# Supplementary material for: The Tara Oceans voyage reveals global diversity and distribution patterns of marine planktonic ciliates
Source: PubMed Central journal article supplement (PMC5025661; doi:10.1038/srep33555), 2016-09-16
Supplement: srep33555-s1.pdf [file srep33555-s1.pdf]

## **Supplementary Information S1: The *Tara* Oceans voyage reveals global diversity and distribution patterns of marine planktonic ciliates**

Anna Gimmler<sup>1</sup>, Ralf Korn<sup>2,3</sup>, Colomban de Vargas<sup>4,5</sup>, Stéphane Audic<sup>4,5</sup>, Thorsten Stoeck<sup>1\*</sup>

<sup>1</sup>University of Kaiserslautern, Ecology Group, D-67663 Kaiserslautern, Germany

<sup>2</sup>University of Kaiserslautern, Financial Mathematics Group, D-67663 Kaiserslautern, Germany

<sup>3</sup>Fraunhofer Institute for Industrial Mathematics ITWM, D-67663 Kaiserslautern, Germany

<sup>4</sup>CNRS, UMR 7144, Station Biologique de Roscoff, Place Georges Teissier, F-29680 Roscoff, France

<sup>5</sup>Sorbonne Universités, UPMC Univ Paris 06, UMR 7144, Station Biologique de Roscoff, Place Georges Teissier, F-29680 Roscoff, France

\* correspondence:

email: [stoeck@rhrk.uni-kl.de](mailto:stoeck@rhrk.uni-kl.de)

phone: +49-631-2052502

fax: +49-631-2052496

| station | environmental feature          | oceanic region       | longitude | latitude | salinity  | temperature [°C] | oxygen [μmol/kg] | NO <sub>2</sub> <sup>-</sup> [μmol/l] | PO <sub>4</sub> <sup>3-</sup> [μmol/l] |
|---------|--------------------------------|----------------------|-----------|----------|-----------|------------------|------------------|---------------------------------------|----------------------------------------|
| 004     | surface water layer            | Mediterranean Sea    | -6.553    | 36.563   | 36.629607 | 20.336888        | NA               | NA                                    | NA                                     |
| 004     | deep chlorophyll maximum layer | Mediterranean Sea    | -6.553    | 36.563   | 36.556443 | 16.240096        | NA               | NA                                    | NA                                     |
| 007     | surface water layer            | Mediterranean Sea    | 1.948     | 37.031   | 37.4911   | 23.82415         | NA               | 0                                     | 0.06                                   |
| 007     | deep chlorophyll maximum layer | Mediterranean Sea    | 1.948     | 37.031   | NA        | NA               | NA               | 0                                     | 0.01                                   |
| 009     | surface water layer            | Mediterranean Sea    | 5.82      | 39.112   | 37.8053   | 24.5021          | NA               | 0.01                                  | 0.02                                   |
| 009     | deep chlorophyll maximum layer | Mediterranean Sea    | 5.82      | 39.112   | 37.8232   | 16.143033        | NA               | 0.02                                  | 0.02                                   |
| 011     | surface water layer            | Mediterranean Sea    | 2.798     | 41.666   | NA        | NA               | NA               | NA                                    | NA                                     |
| 016     | surface water layer            | Mediterranean Sea    | 15.454    | 37.398   | 38.133342 | 20.659508        | 210.106333       | 0.02                                  | 0.04                                   |
| 016     | deep chlorophyll maximum layer | Mediterranean Sea    | 15.454    | 37.398   | 38.262447 | 18.242387        | 220.830542       | 0.01                                  | 0.04                                   |
| 018     | surface water layer            | Mediterranean Sea    | 14.288    | 35.756   | 37.89245  | 21.4384          | 207.791417       | 0.018                                 | 0.026                                  |
| 018     | deep chlorophyll maximum layer | Mediterranean Sea    | 14.288    | 35.756   | 37.89241  | 18.357443        | 237.8893         | 0.025                                 | 0.013                                  |
| 020     | surface water layer            | Mediterranean Sea    | 14.973    | 34.451   | 38.378467 | 21.471742        | 197.550333       | 0.01                                  | 0.01                                   |
| 022     | surface water layer            | Mediterranean Sea    | 17.4      | 39.729   | 37.759667 | 17.040533        | 220.927083       | 0.07                                  | 0.02                                   |
| 022     | deep chlorophyll maximum layer | Mediterranean Sea    | 17.4      | 39.729   | 38.116167 | 17.251367        | 220.987333       | 0.02                                  | 0.01                                   |
| 023     | surface water layer            | Mediterranean Sea    | 17.729    | 42.176   | 38.187633 | 17.635625        | 220.000333       | 0.01                                  | 0.01                                   |
| 023     | deep chlorophyll maximum layer | Mediterranean Sea    | 17.729    | 42.176   | 38.395417 | 15.696917        | 224.266917       | 0.01                                  | 0.01                                   |
| 024     | surface water layer            | Mediterranean Sea    | 17.956    | 42.457   | 38.114217 | 18.141667        | 218.536917       | 0.01                                  | 0.01                                   |
| 025     | surface water layer            | Mediterranean Sea    | 19.421    | 39.333   | 38.182917 | 18.341542        | 218.016833       | 0                                     | 0.01                                   |
| 025     | deep chlorophyll maximum layer | Mediterranean Sea    | 19.421    | 39.333   | 38.475705 | 15.153159        | 229.547682       | 0.07                                  | 0.07                                   |
| 026     | surface water layer            | Mediterranean Sea    | 20.188    | 38.431   | 38.356667 | 19.16765         | 212.903417       | 0.01                                  | 0.01                                   |
| 030     | surface water layer            | Mediterranean Sea    | 32.789    | 33.929   | 39.425058 | 20.452725        | 207.567167       | 0                                     | 0                                      |
| 030     | deep chlorophyll maximum layer | Mediterranean Sea    | 32.789    | 33.929   | 39.255952 | 18.966866        | 218.132538       | 0.01                                  | 0                                      |
| 031     | surface water layer            | Red Sea              | 34.819    | 27.151   | 39.981867 | 25.060908        | 188.763583       | 0.014                                 | 0.024                                  |
| 032     | surface water layer            | Red Sea              | 37.254    | 23.391   | 39.74725  | 25.823117        | 188.416583       | 0.014                                 | 0.018                                  |
| 032     | deep chlorophyll maximum layer | Red Sea              | 37.254    | 23.391   | 40.196433 | 26.0308          | 179.968          | 0.01                                  | 0.025                                  |
| 033     | surface water layer            | Red Sea              | 38.218    | 22.057   | 38.937417 | 27.32825         | 182.812167       | 0                                     | 0.053                                  |
| 033     | deep chlorophyll maximum layer | Red Sea              | 38.218    | 22.057   | NA        | NA               | NA               | NA                                    | NA                                     |
| 034     | surface water layer            | Red Sea              | 39.884    | 18.445   | 38.646858 | 27.59735         | 184.061167       | 0.02                                  | 0.19                                   |
| 034     | deep chlorophyll maximum layer | Red Sea              | 39.884    | 18.445   | 38.916583 | 27.575658        | 175.384083       | 0.27                                  | 0.09                                   |
| 036     | surface water layer            | North Indian Ocean   | 63.524    | 20.824   | 36.530058 | 25.5802          | NA               | 0.05                                  | 0.37                                   |
| 036     | deep chlorophyll maximum layer | North Indian Ocean   | 63.524    | 20.824   | 36.549267 | 25.370083        | 211.606583       | 0.51                                  | 0.51                                   |
| 038     | surface water layer            | North Indian Ocean   | 64.576    | 19.017   | 36.617917 | 26.23015         | 199.9355         | 0.01                                  | 0.32                                   |
| 038     | deep chlorophyll maximum layer | North Indian Ocean   | 64.576    | 19.017   | NA        | 25.488758        | 154.699917       | 0.7                                   | 0.42                                   |
| 039     | surface water layer            | North Indian Ocean   | 66.463    | 18.647   | 36.285367 | 26.816392        | 193.3535         | 0.01                                  | 0.23                                   |
| 039     | deep chlorophyll maximum layer | North Indian Ocean   | 66.463    | 18.647   | 36.332317 | 26.806383        | 192.95875        | 0.02                                  | 0.26                                   |
| 041     | surface water layer            | North Indian Ocean   | 70.011    | 14.582   | 36.024883 | 29.08805         | 187.42925        | 0                                     | 0.14                                   |
| 041     | deep chlorophyll maximum layer | North Indian Ocean   | 70.011    | 14.582   | 36.496162 | 27.104162        | 148.328125       | 0.07                                  | 0.34                                   |
| 042     | surface water layer            | North Indian Ocean   | 73.919    | 5.992    | 34.56155  | 29.978933        | 189.25475        | 0                                     | 0.38                                   |
| 042     | deep chlorophyll maximum layer | North Indian Ocean   | 73.919    | 5.992    | 35.103505 | 27.704835        | 132.77885        | 0.15                                  | 0.04                                   |
| 044     | surface water layer            | North Indian Ocean   | 71.52     | 2.806    | 35.039842 | 30.692617        | 188.152333       | 0                                     | 0.11                                   |
| 045     | surface water layer            | North Indian Ocean   | 71.71     | 0.941    | 35.091133 | 30.495017        | 185.243833       | 0.02                                  | 1.94                                   |
| 048     | surface water layer            | South Indian Ocean   | 66.32     | -9.408   | 34.181417 | 29.844617        | 187.598417       | 0.01                                  | 0.08                                   |
| 052     | surface water layer            | South Indian Ocean   | 53.508    | -17.023  | 34.566667 | 27.867083        | 191.68           | 0                                     | 0.12                                   |
| 052     | deep chlorophyll maximum layer | South Indian Ocean   | 53.508    | -17.023  | 34.910755 | 24.87709         | 192.55925        | 0.03                                  | 0.08                                   |
| 064     | surface water layer            | South Indian Ocean   | 37.929    | -29.508  | 35.334717 | 22.164483        | 210.000775       | 0                                     | 0.08                                   |
| 064     | deep chlorophyll maximum layer | South Indian Ocean   | 37.929    | -29.508  | 35.335545 | 22.237532        | 207.446227       | 0                                     | 0.08                                   |
| 065     | surface water layer            | South Indian Ocean   | 26.334    | -35.226  | 35.446666 | 21.81569         | 207.0439         | NA                                    | NA                                     |
| 065     | deep chlorophyll maximum layer | South Indian Ocean   | 26.334    | -35.226  | NA        | 21.809275        | 206.43725        | NA                                    | NA                                     |
| 066     | surface water layer            | South Atlantic Ocean | 18.016    | -34.905  | 35.323317 | 15.032708        | 238.916333       | 0.3                                   | 0.34                                   |
| 066     | deep chlorophyll maximum layer | South Atlantic Ocean | 18.016    | -34.905  | 35.3315   | 15.01455         | 240.4135         | 0.26                                  | 0.37                                   |
| 067     | surface water layer            | South Atlantic Ocean | 17.206    | -32.292  | 34.845292 | 12.833708        | 249.351417       | 0.171                                 | 1.016                                  |
| 068     | surface water layer            | South Atlantic Ocean | 4.62      | -31.039  | 35.68685  | 16.83115         | 231.914833       | 0.25                                  | 0.229                                  |
| 068     | deep chlorophyll maximum layer | South Atlantic Ocean | 4.62      | -31.039  | 35.687803 | 16.780772        | 231.683361       | 0.285                                 | 0.227                                  |
| 070     | surface water layer            | South Atlantic Ocean | -3.413    | -20.229  | 36.376225 | 19.775817        | 215.650833       | 0.054                                 | 0.364                                  |
| 072     | surface water layer            | South Atlantic Ocean | -18.006   | -8.691   | 36.42324  | 25.0249          | 199.1195         | 0.003                                 | 0.104                                  |
| 072     | deep chlorophyll maximum layer | South Atlantic Ocean | -18.006   | -8.691   | 36.603343 | 24.092317        | 194.428431       | 0.011                                 | 0.143                                  |
| 076     | surface water layer            | South Atlantic Ocean | -35.231   | -21.029  | 37.101367 | 23.3484          | 206.194333       | 0.001                                 | 0.056                                  |
| 076     | deep chlorophyll maximum layer | South Atlantic Ocean | -35.231   | -21.029  | 36.724683 | 21.613933        | 203.814833       | 0.015                                 | 0.038                                  |
| 078     | surface water layer            | South Atlantic Ocean | -43.323   | -30.158  | 36.32425  | 19.853083        | 221.47475        | 0                                     | 0                                      |
| 078     | deep chlorophyll maximum layer | South Atlantic Ocean | -43.323   | -30.158  | 36.27495  | 19.287683        | 217.140667       | 0.053                                 | 0                                      |
| 082     | surface water layer            | Southern Ocean       | -58.012   | -47.165  | 34.048642 | 7.321            | 305.012167       | 0.151                                 | 1.301                                  |
| 082     | deep chlorophyll maximum layer | Southern Ocean       | -58.012   | -47.165  | 34.057594 | 6.971806         | 306.211529       | 0.135                                 | 1.416                                  |
| 084     | surface water layer            | Southern Ocean       | -60.471   | -60.395  | 33.71972  | 1.84374          | 338.2982         | 0.266                                 | 1.723                                  |
| 085     | surface water layer            | Southern Ocean       | -49.503   | -62.176  | 34.35388  | 0.67084          | 343.4373         | 0.107                                 | 2.111                                  |
| 085     | deep chlorophyll maximum layer | Southern Ocean       | -49.503   | -62.176  | 34.319478 | -0.784051        | 325.402987       | 0.06                                  | 2.309                                  |
| 098     | surface water layer            | South Pacific Ocean  | -110.992  | -26.261  | 36.402683 | 25.14755         | 200.538167       | 0                                     | 0.2                                    |
| 098     | deep chlorophyll maximum layer | South Pacific Ocean  | -110.992  | -26.261  | 35.845669 | 20.137131        | 210.5781         | 0.02                                  | 0.1                                    |
| 100     | surface water layer            | South Pacific Ocean  | -96.283   | -13.162  | 35.835267 | 25.249967        | 200.233917       | 0.14                                  | 0.68                                   |
| 100     | deep chlorophyll maximum layer | South Pacific Ocean  | -96.283   | -13.162  | 35.544655 | 20.63862         | 216.790338       | 0.16                                  | 0.78                                   |
| 102     | surface water layer            | South Pacific Ocean  | -85.27    | -5.218   | 34.748175 | 24.941942        | 205.992583       | 0.32                                  | 1                                      |
| 102     | deep chlorophyll maximum layer | South Pacific Ocean  | -85.27    | -5.218   | 34.900284 | 19.557984        | 103.916711       | 1.2                                   | 1.86                                   |
| 109     | surface water layer            | South Pacific Ocean  | -84.545   | 1.8      | 33.3676   | 27.6163          | 198.635833       | 0.04                                  | 0.27                                   |
| 109     | deep chlorophyll maximum layer | South Pacific Ocean  | -84.545   | 1.8      | 34.344808 | 26.525285        | 203.127654       | 0.11                                  | 0.5                                    |
| 111     | surface water layer            | South Pacific Ocean  | -100.662  | -16.932  | 35.97144  | 22.76754         | 208.8654         | 0.04                                  | 0.5                                    |
| 111     | deep chlorophyll maximum layer | South Pacific Ocean  | -100.662  | -16.932  | 35.687249 | 19.864927        | 211.54555        | 0.2                                   | 0.44                                   |
| 122     | surface water layer            | South Pacific Ocean  | -139.338  | -8.969   | 35.3662   | 26.54279         | 186.2407         | 0.12                                  | 0.57                                   |
| 122     | deep chlorophyll maximum layer | South Pacific Ocean  | -139.338  | -8.969   | 36.097575 | 24.67165         | 179.916875       | 0.1                                   | 0.59                                   |
| 123     | surface water layer            | South Pacific Ocean  | -140.304  | -8.878   | 35.359483 | 26.574917        | 189.758333       | 0.14                                  | 0.53                                   |
| 123     | deep chlorophyll maximum layer | South Pacific Ocean  | -140.304  | -8.878   | NA        | NA               | NA               | NA                                    | NA                                     |
| 124     | surface water layer            | South Pacific Ocean  | -140.588  | -8.999   | 35.396729 | 26.516693        | 190.724          | 0.16                                  | 0.63                                   |
| 124     | deep chlorophyll maximum layer | South Pacific Ocean  | -140.588  | -8.999   | NA        | NA               | NA               | NA                                    | NA                                     |
| 125     | surface water layer            | South Pacific Ocean  | -142.61   | -8.89    | 35.427733 | 26.778917        | 187.302833       | 0.19                                  | 0.56                                   |
| 125     | deep chlorophyll maximum layer | South Pacific Ocean  | -142.61   | -8.89    | NA        | NA               | NA               | NA                                    | NA                                     |
