# Supplementary material for: The Tara Oceans voyage reveals global diversity and distribution patterns of marine planktonic ciliates
Source: PubMed Central journal article supplement (PMC5025661; doi:10.1038/srep33555), 2016-09-16
Supplement: srep33555-s2.pdf [file srep33555-s2.pdf]

## **Supplementary Information S2: The *Tara* Oceans voyage reveals global diversity and distribution patterns of marine planktonic ciliates**

Anna Gimmler<sup>1</sup>, Ralf Korn<sup>2,3</sup>, Colomban de Vargas<sup>4,5</sup>, Stéphane Audic<sup>4,5</sup>, Thorsten Stoeck<sup>1\*</sup>

<sup>1</sup>University of Kaiserslautern, Ecology Group, D-67663 Kaiserslautern, Germany

<sup>2</sup>University of Kaiserslautern, Financial Mathematics Group, D-67663 Kaiserslautern, Germany

<sup>3</sup>Fraunhofer Institute for Industrial Mathematics ITWM, D-67663 Kaiserslautern, Germany

<sup>4</sup>CNRS, UMR 7144, Station Biologique de Roscoff, Place Georges Teissier, F-29680 Roscoff, France

<sup>5</sup>Sorbonne Universités, UPMC Univ Paris 06, UMR 7144, Station Biologique de Roscoff, Place Georges Teissier, F-29680 Roscoff, France

\* correspondence:

email: [stoeck@rhrk.uni-kl.de](mailto:stoeck@rhrk.uni-kl.de)

phone: +49-631-2052502

fax: +49-631-2052496

| #OTU ID | representative sequence      | total number of reads | 4.SUR | 4.DCM |
|---------|------------------------------|-----------------------|-------|-------|
| 1889    | GTCGCTCCTACCGATTGAATGATCCG(  | 4                     | 0     | 0     |
| 595     | GTCGCTCCTACCGATTTGAGTACTTT   | 102                   | 0     | 0     |
| 635     | GTCGCTCCTACCGATTTGAGTGCTTT   | 166                   | 0     | 0     |
| 717     | GTCGCTCCTACCGATTTGAGTGCTTT   | 70                    | 0     | 0     |
| 1334    | GTCGCTCCTACCGATTGAGTGTTCTG(  | 18                    | 3     | 0     |
| 1599    | GTCGCTCCTACCGATTTGAGTGCTTT   | 12                    | 0     | 0     |
| 2132    | GTCGCTCCTACCGATTTGAGTGCTCT   | 3                     | 0     | 0     |
| 350     | GTCGCTGCTACCGATTGAGTGATCCG   | 757                   | 0     | 2     |
| 648     | GTCGCTGCTACCGATTGAGTGGTCCG   | 248                   | 0     | 16    |
| 334     | GTCGCTCCTACCGATTTTGAAGTATCC  | 492                   | 0     | 2     |
| 694     | GTCGCTGCTACCGATTGAGTGGTCCG   | 73                    | 0     | 0     |
| 1579    | GTCGCTGCTACCGATTGGGTGTTCCG(  | 11                    | 0     | 0     |
| 1831    | GTCGCTGCTACCGATTGAGTGGTCCG   | 7                     | 0     | 0     |
| 583     | GTCGCTGCTACCGATTGAGTGATCCG   | 107                   | 0     | 0     |
| 911     | GTCGCTCCTACCGATTGAGTGGTCCG(  | 51                    | 0     | 4     |
| 958     | GTCGCTCCTACCGATTGAGTGATCCG(  | 25                    | 0     | 0     |
| 324     | GTCGCTGCTACCGATTGAGTGGTCCG   | 2981                  | 9     | 14    |
| 35      | GTCGCTGCTACCGATTGAGTGGTCCG   | 21471                 | 128   | 17    |
| 85      | GTCGCTCCTACCGATTTTGAAGTGGTC  | 5465                  | 4     | 0     |
| 439     | GTCGCTCCTACCGATTTTGAAGTATCC  | 277                   | 0     | 0     |
| 474     | GTCGCTCCTACCGATTTTGAATGGTCC  | 183                   | 0     | 0     |
| 914     | GTCGCTCCTACCGATTTGAGTGATTC   | 29                    | 0     | 0     |
| 994     | GTCGCTGCTACCGATTGAGTGGTCCG   | 44                    | 0     | 0     |
| 1122    | GTCGCTCCTACCGATTTTGAAGTATCC  | 16                    | 0     | 0     |
| 1169    | GTCGCTGCTACCGATTGAGTGATCCG   | 14                    | 0     | 0     |
| 1467    | GTCGCTCCTACCGATTTTGAAGTGGTC  | 7                     | 0     | 0     |
| 1548    | GTCGCTCCTACCGATTTTGAAGTGGTC  | 8                     | 0     | 0     |
| 1681    | GTCGCTCCTACCGATTTTGAAGTATCC  | 5                     | 0     | 0     |
| 1767    | GTCGCTCCTACCGATTTTGAAGTATCC  | 4                     | 0     | 0     |
| 2008    | GTCGCTGCTACCGATTGAGTGGTCCG   | 33                    | 0     | 0     |
| 1362    | GTCGCTACTACCGATTGAGTGGTCCG   | 51                    | 0     | 0     |
| 1766    | GTCGCTCCTACCGATTTTGAAGTATCC  | 4                     | 0     | 0     |
| 299     | GTCGCTGCTACCGATTGAGTGGTCCG   | 781                   | 21    | 26    |
| 473     | GTCGCTGCTACCGATTGAGTGATCCG   | 184                   | 0     | 0     |
| 781     | GTCGCTGCTACCGATTGAGTGATCCG   | 47                    | 0     | 0     |
| 888     | GTCGCTCCTACCGATTTGAGTGATCCC  | 32                    | 0     | 0     |
| 4       | GTCGCTGCTACCGATTTTGAAGTGGTC( | 176901                | 15    | 5     |
| 32      | GTCGCTGCTACCGATTGAGTGATCAG   | 25263                 | 13    | 0     |
| 37      | GTCGCTGCTACCGATTTTGAAGTGGTC( | 13695                 | 7     | 0     |
| 145     | GTCGCTGCTACCGATTGAGTGGTCCG   | 2369                  | 0     | 0     |
| 167     | GTCGCTGCTACCGATTGAGAGATCCG   | 1672                  | 0     | 0     |
| 169     | GTCGCTGCTACCGATTGAGTGGTCCG   | 1576                  | 3     | 5     |
| 178     | GTCGCTGCTACCGATTGAGTGATCCG   | 1460                  | 0     | 0     |
| 187     | GTCGCTGCTACCGATTGAGTGATCCG   | 3575                  | 1     | 0     |
| 199     | GTCGCTGCTACCGATTGAGTGTTGAG   | 1342                  | 2     | 27    |
| 287     | GTCGCTGCTACCGATTGAGTGATCCG   | 718                   | 0     | 0     |
| 296     | GTCGCTGCTACCGATTGAGTGTTCCG(  | 1334                  | 5     | 29    |

|      |                             |       |      |     |
|------|-----------------------------|-------|------|-----|
| 342  | GTCGCTGCTACCGATTGAGTGGTCCG  | 683   | 0    | 0   |
| 408  | GTCGCTGCTACCGATTGAGTGATCCG  | 433   | 0    | 0   |
| 418  | GTCGCTGCTACCGATTGAGTATTCCG  | 348   | 0    | 0   |
| 428  | GTCGCTGCTACCGATTGAGTGTTCCG  | 986   | 2    | 15  |
| 459  | GTCGCTGCTACCGATTGAGTGGTCCG  | 279   | 0    | 4   |
| 478  | GTCGCTGCTACCGATTGAGTGTTCCG  | 178   | 0    | 0   |
| 516  | GTCGCTGCTACCGATTGAGTGTTCCG  | 202   | 7    | 1   |
| 521  | GTCGCTGCTACCGATTGAGTGATACG  | 334   | 0    | 0   |
| 543  | GTCGCTGCTACCGATTTTGAGTGATC  | 129   | 0    | 0   |
| 552  | GTCGCTGCTACCGATTGAGTGATTAG  | 124   | 0    | 0   |
| 567  | GTCGCTGCTACCGATTGAGTGTTCCG  | 254   | 0    | 13  |
| 616  | GTCGCTGCTACCGATTGAGTGATCCG  | 169   | 0    | 0   |
| 768  | GTCGCTGCTACCGATTGAGTGTTCCG  | 58    | 0    | 0   |
| 809  | GTCGCTGCTACCGATTGAGTGTTCCG  | 104   | 0    | 0   |
| 868  | GTCGCTGCTACCGATTGAGTGTTCCG  | 94    | 0    | 1   |
| 905  | GTCGCTGCTACCGATTGAGTGATCCG  | 39    | 0    | 0   |
| 949  | GTCGCTGCTACCGATTGAGTGATCCG  | 35    | 0    | 0   |
| 966  | GTCGCTGCTACCGATTGAGTGTCCG   | 39    | 0    | 0   |
| 991  | GTCGCTGCTACCGATTTTGAGTGATC  | 23    | 0    | 0   |
| 1015 | GTCGCTGCTACCGATTGAGTGTTCCG  | 25    | 0    | 0   |
| 1172 | GTCGCTGCTACCGATTGAGTGTTCCG  | 14    | 0    | 0   |
| 1259 | GTCGCTCCTACCGATTGAGTGATCCG  | 11    | 0    | 0   |
| 1355 | GTCGCACCTACCGATTTTGAGTGGTC  | 17    | 0    | 0   |
| 1415 | GTCGCTACTACTGATTGGATGATCCG  | 17    | 0    | 0   |
| 1421 | GTTGCTGCTACCGATTGAGAGTTCCG  | 8     | 0    | 0   |
| 1479 | GTCGCTGCTACCGATTGAGTGATCCG  | 7     | 0    | 0   |
| 1560 | GTCGCTGCTACCGATTGAGTGATACG  | 18    | 0    | 0   |
| 1667 | GTCGCTGCTACCGATTGAGGGTCCG   | 8     | 0    | 0   |
| 1949 | GTCGCTGCTACCGATTGTGAGTGGTC  | 9     | 0    | 0   |
| 481  | GTCGCTGCTACCGATTGAGTGATCCG  | 270   | 0    | 0   |
| 622  | GTCGCTGCTACCGATTGAGTGATCCG  | 152   | 0    | 0   |
| 881  | GTCGCTGCTACCGATTGAGTGATCCG  | 75    | 0    | 0   |
| 1144 | GTCGCTGCTACCGATTGAGTGATCCG  | 15    | 0    | 0   |
| 1549 | GTCGCTCCTACCGATTTTGAGTGGTC  | 6     | 0    | 0   |
| 1645 | GTCGCTCCTACCGATTGAGTGGTCCG  | 5     | 0    | 0   |
| 1022 | GTCGCTCCTACCGATTTTGAGTGATCC | 21    | 0    | 0   |
| 1135 | GTCGCTCCTACCGATTTTGAGTGATCC | 41    | 0    | 0   |
| 1316 | GTCGCTGCTACCGATTGAGTGGTCCG  | 10    | 0    | 0   |
| 1550 | GTCGCTCCTACCGATTTTGAGTGGTC  | 6     | 0    | 0   |
| 25   | GTCGCTCCTACCGATCGAGTGTTTAG/ | 25804 | 2    | 0   |
| 26   | GTCGCTCCTACCGATCGAGTGTTTAG/ | 18947 | 1653 | 115 |
| 39   | GTCGCTACTACCGATTGAATGGTTTA/ | 13520 | 14   | 3   |
| 235  | GTCGCTCCTACCGATCGAGTGATTAG/ | 1214  | 0    | 0   |
| 388  | GTCGCTCCTACCGATCGAGTGTTTAG/ | 308   | 0    | 1   |
| 514  | GTCGCTCCTACCGATCGAGTGATTAG/ | 149   | 0    | 0   |
| 715  | GTCGCTCCTACCGATTCGAGTGATTA/ | 64    | 0    | 0   |
| 860  | GTCGCTCCTACCGATCGAGTGTTTAG/ | 36    | 0    | 0   |
| 1072 | GTCGCTCCTACCGATTGAGTGATCCG/ | 25    | 3    | 0   |

|      |                              |       |     |     |
|------|------------------------------|-------|-----|-----|
| 1525 | GTCGCTCCTACCGATTTGAGTGTCTA   | 7     | 0   | 0   |
| 1537 | GTCGCTCCTACCGATCGAGTGATTAG   | 7     | 0   | 0   |
| 1538 | GTCGCTCCTACCGATCGAGTGTTTAG   | 8     | 1   | 0   |
| 1695 | GTCGCTCCTACCGATCGAGTGTTTAG   | 129   | 0   | 0   |
| 1739 | GTCGCTCCTACCGATGAATGTTCCGA   | 5     | 0   | 0   |
| 13   | GTCGCTCCTACCGATCGAGTGTTTAG   | 74486 | 7   | 8   |
| 531  | GTCGCTCCTACCGATTTGAGTGATCC   | 464   | 0   | 0   |
| 977  | GTCGTTACTACCGATTGGTGTGCAGG   | 25    | 0   | 0   |
| 1252 | GTCGCTACTACCGATTGAGTGCCAGG   | 22    | 0   | 0   |
| 1455 | GTCGCTACTACCGATTGAATGGTTTAC  | 18    | 0   | 0   |
| 1526 | GTCGCTCTACCGATTGAGTAATTCTA   | 7     | 0   | 0   |
| 1742 | GTCGCTGCTACCGATTGGATGGTTCT   | 5     | 0   | 0   |
| 1744 | GTCGCTCCTACCGATCGAGTGTTTAG   | 5     | 0   | 0   |
| 850  | GTCGCTCCTACCGATTTGCGGTTACTCT | 37    | 0   | 0   |
| 171  | GTCGCTCCTACCGATTTTGAGTGATCC  | 1528  | 0   | 0   |
| 200  | GTCGCTCGTACCGATTTGAGTGATCC   | 1345  | 50  | 0   |
| 468  | GTCGCTGCTACCGATTGAGTGTTCCG   | 199   | 1   | 5   |
| 681  | GTCGCTCCTACCGATTTGAGTGATCC   | 141   | 0   | 0   |
| 786  | GTCGCTCCTACCGATTGAGTGATCTG   | 59    | 1   | 0   |
| 214  | GTCGCTCCTACCGATACCGGGTGATC   | 1712  | 889 | 16  |
| 1335 | GTCGCTCCTACCGATACCGGGTGATC   | 10    | 0   | 0   |
| 1388 | GTCGCTCCTACCGATTTGCGGTTACTCT | 9     | 0   | 0   |
| 208  | GTCGCTCCTACCGATTTGAGTGATTA   | 1259  | 1   | 0   |
| 736  | GTCGCTCCTACCGATTTGAGTGATCA   | 324   | 0   | 1   |
| 1249 | GTCGCTCCTACCGATTTGAGTGATCA   | 32    | 0   | 0   |
| 398  | GTCGCTCCTACCGATTTGAGTGATCC   | 551   | 0   | 0   |
| 448  | GTCGCTCCTACCGATTTGAGTGATCC   | 218   | 0   | 1   |
| 530  | GTCGCTCCTACCGATTTGAGTGATCC   | 486   | 0   | 0   |
| 574  | GTCGCTCCTACCGATTTGAGTGATCC   | 281   | 0   | 0   |
| 927  | GTCGCTCCTACCGACTTGAGTGGTCC   | 28    | 0   | 0   |
| 1504 | GTCGCTCCTACCGATTTGCGGTTACTCT | 9     | 0   | 0   |
| 2147 | GTCGCTCCTACCGATACCGGGTGATC   | 3     | 0   | 0   |
| 419  | GTCGCTCCTACCGATTTGAGTGATCA   | 266   | 2   | 3   |
| 617  | GTCGCTCCTACCGATTTGAGTGATCA   | 105   | 0   | 0   |
| 780  | GTCGCTCCTACCGATTTGAGTGATCA   | 268   | 0   | 5   |
| 1155 | GTCGCTCCTACCGATTGCGAGTGATC   | 300   | 0   | 0   |
| 288  | GTCGCTCCTACCGATACCGGGTGATC   | 737   | 50  | 4   |
| 670  | GTCGCTCCTACCGATTGGGTGAAATG   | 126   | 0   | 0   |
| 1438 | GTCGCTCCTACCTTGTGTGAAATGGT   | 8     | 0   | 0   |
| 652  | GTCGCTCCTACCGATTTGAGTGATTA   | 121   | 0   | 0   |
| 413  | GTCGCTCCTACCGATATAGGTGATCC   | 260   | 0   | 133 |
| 710  | GTCGCTCCTACCGATTTGAGTGATCA   | 65    | 0   | 0   |
| 1006 | GTCGCTCCTACCGATTTGCGGTTACTCT | 50    | 0   | 0   |
| 580  | GTCGCTCCTACCGATACCGGGTGTTG   | 109   | 0   | 0   |
| 49   | GTCGCTCCTACCGATACCGGGTGTTA   | 10846 | 0   | 4   |
| 365  | GTCGCTCCTACCGATACCGGGTGATG   | 346   | 0   | 0   |
| 880  | GTCGCTCCTACCGATTTGAGTGTTGT   | 65    | 0   | 0   |
| 1246 | GTCGCTGCTACCGATACCGGGTGATG   | 12    | 0   | 0   |

|      |                             |       |    |      |
|------|-----------------------------|-------|----|------|
| 725  | GTCGCTCCTACCGATTGAGTGCTTTGC | 78    | 0  | 0    |
| 1884 | GTCGCTCCTACCGATTTGAGTGGTT/  | 5     | 0  | 0    |
| 111  | GTCGCTGCTACCGATTGGGTGATCCA  | 3418  | 87 | 47   |
| 497  | GTCGCTCCTACCGATTTGAGTGGTT/  | 460   | 0  | 0    |
| 818  | GTCGCTGCTACCGATACCGGGTGATG  | 60    | 0  | 0    |
| 1105 | GTCGCTCCTACCGATTTGAGTGCTTT  | 17    | 0  | 0    |
| 1654 | GTCGCTGCTACCGATTGAGTGATCCA/ | 5     | 0  | 0    |
| 2139 | GTCGCTCCTACCGATTTGAGTGGTT/  | 5     | 0  | 0    |
| 1605 | GTCGCTCCTACCGATTTGAGTGGTC/  | 8     | 0  | 0    |
| 327  | GTCGCTCCTACCGATATCGGGTGATA/ | 461   | 0  | 0    |
| 634  | GTCGCTCCTACCGATTTGAGTGGTCC/ | 237   | 0  | 5    |
| 1887 | GTCGCTCCTACCGATTTGAGTGGTC/  | 40    | 0  | 0    |
| 56   | GTCGCTGCTACCGATTGAGTGATCCG  | 8868  | 6  | 26   |
| 104  | GTCGCTGCTACCGATTTTGAAGTATTC | 3740  | 1  | 0    |
| 211  | GTCGCTGCTACCGATGAGTGATCCGG  | 1380  | 11 | 89   |
| 320  | GTCGCTGCTACCGATGAGTGATCCGG  | 470   | 0  | 0    |
| 374  | GTCGCTGCTACCGATGAGTGATCCGG  | 379   | 0  | 7    |
| 386  | GTCGCTGCTACCGATGAGTGATCCGG  | 390   | 5  | 4    |
| 522  | GTCGCTGCTACCGATTTTGAAGTATTC | 139   | 0  | 0    |
| 788  | GTCGCTGCTACCGATTGAGTGATCCG  | 85    | 0  | 0    |
| 979  | GTCGCTTCTACCGATTGAGTGATCCG/ | 124   | 3  | 0    |
| 1196 | ATCGCTGCTACCGATTGAGTGATCCG/ | 20    | 0  | 0    |
| 1269 | GTCGCTGCTACCGATTGATTGATCCG/ | 11    | 0  | 0    |
| 1313 | GTCGCTGCTACCGATGAGTGATCCGG  | 20    | 0  | 5    |
| 1660 | GTCGCTGCTACCGATTGAGTGATCCG  | 19    | 3  | 0    |
| 1822 | GTCGCTGCTACCTATTGAGTGATCCG/ | 4     | 0  | 0    |
| 2024 | GTCGCTGTTACCGATTGAGTGATCCG/ | 3     | 0  | 0    |
| 549  | GTCGCTCCTACCGATTTTGAAGTATTC | 173   | 0  | 0    |
| 676  | GTCGCTGCTACCGATTGAGTGATCCG  | 74    | 0  | 0    |
| 932  | GTCGCTCCTACCGATTGAGTGGTCCG/ | 39    | 0  | 0    |
| 660  | GTCGCTCCTACCGATTTGAGTGATACT | 82    | 0  | 0    |
| 346  | GTCGCTGCTACCGATTGAGTGGTCCG  | 736   | 0  | 0    |
| 444  | GTCGCTCCTACCGATTTGAGTGATCC/ | 220   | 0  | 0    |
| 502  | GTCGCTGCTACCGATTGAGTGTTCCG/ | 153   | 0  | 22   |
| 926  | GTCGCTGCTACCGATTGAGTGGTCCG  | 28    | 0  | 0    |
| 963  | GTCGCTGCTACCGATTGAGTGATCCG  | 25    | 0  | 0    |
| 1463 | GTCGCTCCTACCGATTTGAGTGATCC/ | 7     | 0  | 0    |
| 812  | GTCGCTCCTACCGATTGAGTGATCAG/ | 42    | 0  | 0    |
| 354  | GTCGCTGCTACCGATTTGAGTGGTC/  | 386   | 0  | 0    |
| 535  | GTCGCTGCTACCGATTTGAGTGGTC/  | 175   | 2  | 0    |
| 1571 | GTCGCTGCTACCGATTTGAGTGGTC/  | 6     | 0  | 0    |
| 1849 | GTCGCTGCTACCGATTTGAGTGTTCC/ | 4     | 0  | 0    |
| 20   | GTCGCTGCTACCGATTTGAGTGGTC/  | 35767 | 22 | 1429 |
| 134  | GTCGCTGCTACCGATTTGAGTGGTC/  | 3115  | 0  | 0    |
| 174  | GTCGCTGCTACCGATTTGAGTGGTC/  | 2554  | 2  | 27   |
| 195  | GTCGCTGCTACCGATTTGAGTGGTT/  | 1300  | 0  | 0    |
| 226  | GTCGCTGCTACCGATTTGAGTGGTC/  | 1810  | 1  | 4    |
| 267  | GTCGCTGCTACCGATTTGAGTGGTC/  | 758   | 0  | 0    |

|      |                              |       |    |    |
|------|------------------------------|-------|----|----|
| 435  | GTCGCTGCTACCGATTTTCGAGTGGTC  | 236   | 0  | 0  |
| 559  | GTCGCTGCTACCGATTTTCGAGTGGTC  | 161   | 0  | 0  |
| 565  | GTCGCTGCTACCGATTTTCGAGTGATC  | 130   | 1  | 0  |
| 573  | GTCGCTGCTACCGATTTTCGAGTGTTCC | 117   | 0  | 0  |
| 575  | GTCGCTGCTACCGATTTTCGAGTGGTC  | 113   | 0  | 0  |
| 620  | GTCGCTGCTACCGATTTTCGAGTGATC  | 93    | 0  | 0  |
| 682  | GTCGCTGCTACCGATTTTCGAGTGGTC  | 85    | 0  | 0  |
| 698  | GTCGCTGCTACCGATTTTCGAGTGGTC  | 68    | 0  | 0  |
| 766  | GTCGCTGCTACCGATTTTCGAGTGGTC  | 52    | 0  | 0  |
| 870  | GTCGCTGCTACCGATTTTCGAGTGGTC  | 35    | 0  | 0  |
| 997  | GTCGCTGCTACCGATTTTCGAGTGGTC  | 34    | 0  | 0  |
| 1097 | GTCGCTGCTACCGATTTTCGAGTGGTC  | 17    | 0  | 0  |
| 1237 | GTCGCTGCTACCGATTTTCGAGTGCTCC | 12    | 0  | 0  |
| 1323 | GTCGCTGCTACCGATTTTCGAGTGGTC  | 78    | 0  | 0  |
| 1423 | GTCGCTGCTACCGATTTTCGAGTGGTC  | 14    | 0  | 0  |
| 1430 | GTCGCTCCTACCGATTGAGTGATCCG   | 8     | 0  | 0  |
| 1584 | GTCGCTGCTACCGATTTTCGAGTGGTC  | 6     | 0  | 0  |
| 1588 | GTCGCTGCTACCGATTTTCGAGTGGTC  | 16    | 0  | 0  |
| 2097 | GTCGCTGCTACCGATTTTCGAGTGGTC  | 23    | 0  | 0  |
| 191  | GTCGCTACTACCGATTTTCGAGTGGTC  | 1432  | 0  | 0  |
| 297  | GTCGCTGCTACCGATTTTCGAGTGGTC  | 584   | 0  | 0  |
| 644  | GTCGCTGCTACCGATTGAGTGTTCCG   | 97    | 0  | 0  |
| 970  | GTCGCTGCATCCGATTTTCGAGTGGTC  | 25    | 0  | 0  |
| 14   | GTCGCTGCTACCGATTTTCGAGTGGTC  | 92238 | 24 | 32 |
| 194  | GTCGCTGCTACCGATTTTCGAGTGCTCC | 1302  | 0  | 0  |
| 609  | GTCGCTGCTACCGATTTTCGAGTGGTC  | 101   | 0  | 0  |
| 654  | GTCGCTGCTACCGATTTTCGAGTGGTC  | 81    | 0  | 0  |
| 839  | GTCAGTGCTACCGATTTTCGAGTGGTC  | 297   | 2  | 1  |
| 1203 | GTCGCTGCTACCGATTTTCGAGTGTTCC | 17    | 0  | 0  |
| 1276 | GTCGCTACTACCGATTTTCGAGTGGTC  | 51    | 0  | 0  |
| 1393 | GTCGCTGCTACCGATTTTCGAGTGGTC  | 9     | 0  | 0  |
| 1498 | GTCGCTACTACCGATTGCGAGTGGTC   | 17    | 0  | 0  |
| 1693 | GTCGCTCCTACCGATTGAGTGATCCG   | 9     | 0  | 0  |
| 2069 | GTCGCTGCTACCGATTTTCGAGTGGTC  | 9     | 0  | 0  |
| 2247 | GTCGCTGCTACCGATTTTCGAGTGGTC  | 9     | 0  | 0  |
| 73   | GTCGCTGCTACCGATTTTCGAGTGGTC  | 6856  | 0  | 0  |
| 107  | GTCGCTGCTACCGATTTTCGAGTGGTC  | 9239  | 3  | 0  |
| 253  | GTCGCTGCCACCGATTTTCGAGTGGTC  | 1973  | 1  | 0  |
| 277  | GTCGCTGCTACCGATTTTCGAGTGGTC  | 882   | 0  | 0  |
| 331  | GTCGCTGCTACCGATTTTCGAGTGGTC  | 986   | 0  | 0  |
| 355  | GTCGCTGCTACCGATTTTCGAGTGGTC  | 383   | 0  | 0  |
| 359  | GTCGCTGCTACCGATTTTCGAGTGTTCC | 683   | 0  | 0  |
| 361  | GTCGCTGCTACCGATTTTCGAGTGTTCC | 365   | 0  | 0  |
| 392  | GTCGCTGCTACCGATTTTCGAGTGTTCC | 298   | 0  | 0  |
| 485  | GTCGCTGCTACCGATTTTCGAGTGATC  | 172   | 0  | 0  |
| 528  | GTCGCTGCTACCGATTTTCGAGTGTTCC | 252   | 0  | 4  |
| 539  | GTCGCTGCTACCGATTTTCGAGTGGTC  | 156   | 0  | 0  |
| 553  | GTCGCTGCTACCGATTTTCGAGTGGTC  | 124   | 0  | 0  |

|      |                              |       |   |    |
|------|------------------------------|-------|---|----|
| 582  | GTCGCTGCTACCGATTTTCGAGTGGTC  | 133   | 0 | 0  |
| 586  | GTCGCTGCTACCGATTTTCGAGTGTTCC | 133   | 0 | 0  |
| 588  | GTCGCTGCTACCGATTTTCGAGTGGTC  | 149   | 0 | 0  |
| 604  | GTCGCTGCTACCGATTTTCGAGTGGTC  | 273   | 0 | 0  |
| 713  | GTCGCTGCTACCGATTTTCGAGTGTTCC | 64    | 0 | 0  |
| 769  | GTCGCTGCTACCGATTTTCGAGTGATCC | 51    | 0 | 0  |
| 777  | GTCGCTGCTACCGATTTTCGAGTTGTCC | 48    | 0 | 0  |
| 885  | GTCGCTGCTACCGATTTTCGAGTGGTC  | 63    | 0 | 0  |
| 1084 | GTCGCTGCTACCGATTTTCGAGTGGTC  | 44    | 0 | 0  |
| 1177 | GTCGCTGCTACCGATTTTCGAGTGGTC  | 49    | 0 | 0  |
| 1273 | GTCGCTGCTACCGATTTTCGAGTGGTC  | 11    | 0 | 0  |
| 1374 | GTCGCTGCTACCGATTTTCGAGTGGTC  | 27    | 0 | 0  |
| 1424 | GTCGCTGCTACCGATTTTCGAGTGTTCC | 8     | 0 | 0  |
| 1495 | GTCGCTGCTACCGATTTTCGAGTGGTC  | 7     | 0 | 0  |
| 1572 | GTCGCTGCTACCGATTTTCGAGTGTTCC | 10    | 0 | 0  |
| 1583 | GTCGCTGCTACCGATTTTCGAGTGGTC  | 6     | 0 | 0  |
| 1682 | GTCGCTGCTACCGATTTTCGAGTGGTC  | 12    | 0 | 0  |
| 799  | GTCGCTCCTACCGATTTTCGAGTTACTA | 44    | 0 | 0  |
| 1231 | GTCGCTCCTACCGATTTTCGAGTTACAA | 12    | 0 | 0  |
| 241  | GTCGCTCCTACCGATTGAGTGGTTCCG  | 956   | 0 | 0  |
| 703  | GTCGCTCCTACCGATTGAGTGGTTCCG  | 66    | 0 | 0  |
| 114  | GTCGCTTGTAGTAACGAATGGTCTGG   | 3324  | 2 | 0  |
| 1669 | GTCGCTGCTACCGATTGAGTGTTCCG   | 7     | 0 | 0  |
| 74   | GTCGCTCCTACCGATTGAGTGATCCG   | 17779 | 0 | 38 |
| 380  | GTCGCTCCTACCGATTGAGTGATCCG   | 326   | 0 | 0  |
| 697  | GTCGCTCCTACCGATTGAGTGATCCG   | 239   | 0 | 0  |
| 1035 | GTCGCTGCTACCGATTGAGTGATCCG   | 104   | 3 | 0  |
| 1142 | GTCGCTGCTACCGATTGAGTGATCCG   | 20    | 0 | 0  |
| 1644 | GTCGCTCCTACCGATTGAGTGATCCG   | 19    | 0 | 0  |
| 1806 | GTCGCTCCTACCGATTGAGTGATCCG   | 10    | 0 | 0  |
| 1808 | GTCGCTCCTACCGATTGAGTGATCCG   | 4     | 0 | 0  |
| 2048 | GTCGCTCCTACCGATCGAGTGGTCCG   | 3     | 0 | 0  |
| 479  | GTCGCTGCTACCGATTGAGTGTTCCG   | 223   | 0 | 0  |
| 512  | GTCGCTGCTACCGATTGAGTGTTCCG   | 239   | 0 | 4  |
| 983  | GTCGCTCCTACCGATCGAGTGGTCCG   | 37    | 0 | 0  |
| 1300 | GTCGCTCCTACCGATTTTCGAGTGGTC  | 10    | 0 | 0  |
| 684  | GTCGCTATTACCGATTGGGTGTATAG   | 73    | 0 | 0  |
| 416  | GTCGCTCCTACCGATTTTCGAGTGCTCT | 516   | 0 | 0  |
| 524  | GTCGCTCCTACCGATTTTCGAGTGTTCT | 162   | 0 | 0  |
| 599  | GTCGCTCCTACCGATTTTCGAGTGCTAT | 115   | 1 | 0  |
| 937  | GTCGCTCCTACCGATTTTCGAGTGCTCT | 33    | 0 | 0  |
| 1004 | GTCGCTCCTACCGATTTTCGAGTGGTC  | 32    | 0 | 3  |
| 1183 | GTCGCTCCTACCGATTTTCGAGTGTTAT | 18    | 0 | 0  |
| 1330 | GTCGCTCCTACCGATTTTCGAGTGCTCT | 14    | 0 | 0  |
| 1440 | GTCGCTCCTACCGATTTTCGAGTGCTCT | 12    | 0 | 0  |
| 1709 | GTCGCTCCTACCGATTTTGAGTGATCT  | 5     | 0 | 0  |
| 403  | GTCGCTCCTACCGATTTTCGAGTGAGC  | 276   | 0 | 0  |
| 726  | GTCGCTCCTACCGATTTTCGAGTGCTTT | 64    | 0 | 0  |

|      |                             |        |      |      |
|------|-----------------------------|--------|------|------|
| 849  | GTCGCTCCTACCGATTTCGAGTGAGC  | 85     | 0    | 0    |
| 1065 | GTCGCTCCTACCGATTGAGTGTTGTG  | 38     | 0    | 0    |
| 157  | GTCGCTTTTACCGATTGAGTGCTCAG  | 1830   | 0    | 0    |
| 47   | GTCGCTTTTACCGATTGAGTGTTCAGG | 10598  | 22   | 1    |
| 70   | GTCGCTTTTACCGATTGAGTGTTCAG  | 7492   | 5    | 5    |
| 251  | GTCGCTTTTACCGATTGAGTGTTCAG  | 921    | 0    | 0    |
| 28   | GTCGCTGTTACCGATTGAGTGTTAAG  | 18312  | 246  | 15   |
| 744  | GTCGCTATTGCCGATTGAGTGCTCAG  | 85     | 0    | 0    |
| 784  | GTCGCTGTTACCGATTGAGTGTTAAG  | 52     | 0    | 0    |
| 1210 | GTCGCTATTACCGATTGAGTGTATAG  | 13     | 0    | 0    |
| 1286 | GTCGCTATTACCGATTGAGTGCTAAG  | 11     | 0    | 0    |
| 7    | GTCGCTGCTACCGATTGAGTGATCCG  | 277320 | 2027 | 1683 |
| 63   | GTCGCTGCTACCGATTGAGTGATCCG  | 7666   | 8    | 94   |
| 69   | GTCGCTGCTACCGATTGAGTGATCCG  | 11753  | 40   | 37   |
| 89   | GTCGCTGCTACCGATTGAGTGATCCG  | 5757   | 6    | 38   |
| 90   | GTCGCTGCTACCGATTGAGTGATCCG  | 10139  | 12   | 193  |
| 120  | GTCGCTGCTACCGATTGAGTGATCCG  | 7028   | 19   | 59   |
| 129  | GTCGCTGCTACCGATTGAGTGGTCCG  | 2728   | 6    | 35   |
| 142  | GTCGCTGCTACCGATTGAGTGATCCA  | 4602   | 0    | 4    |
| 146  | GTCGCTGCTACCGATTGAGTGATCCG  | 2204   | 5    | 4    |
| 177  | GTCGCTGCTACCGATTGAGTGGTCCG  | 1688   | 0    | 3    |
| 189  | GTCGCTGCTACCGATTGAGTGGTCCG  | 2886   | 2    | 0    |
| 197  | GTCGCTGCTACCGATTGAGAGGTCCG  | 2612   | 18   | 17   |
| 224  | GTCGCTGCTACCGATTGAGTGGTCCG  | 1033   | 0    | 12   |
| 240  | GTCGCTGCTACCGATTGAGAGGTCCG  | 1045   | 1    | 0    |
| 248  | GTCGCTGCTACCGATTGAGAGATCCG  | 1113   | 0    | 0    |
| 254  | GTCGCTGCTACCGATTGAGTTGTCCG  | 910    | 0    | 0    |
| 266  | GTCGCTGCTACCGATTGAGTGGTCCG  | 1066   | 0    | 0    |
| 268  | GTCGCTGCTACCGATTGAGTGGTCCG  | 735    | 0    | 4    |
| 280  | GTCGCTGCTACCGATTGAGTGTCCG   | 928    | 6    | 16   |
| 291  | GTCGCTGCTACCGATTGAGTGATCCG  | 1025   | 0    | 5    |
| 301  | GTCGCTGCTACCGATTGAGTGTCCG   | 538    | 0    | 50   |
| 303  | GTCGCTGCTACCGATTTGAGTGGTC   | 571    | 0    | 0    |
| 318  | GTCGCTGCTACCGATTTGAGTGGTC   | 503    | 1    | 23   |
| 339  | GTCGCTGCTACCGATTGAGTGGTCCG  | 492    | 0    | 0    |
| 341  | GTCGCTGCTACCGATTGAGTGATCCG  | 416    | 4    | 0    |
| 351  | GTCGCTGCTACCGATTGAGTGATCCG  | 7012   | 109  | 34   |
| 360  | GTCGCTGCTACCGATTGAGTGGTCAG  | 381    | 0    | 0    |
| 368  | GTCGCTGCTACCGATTGAGTGTCCG   | 416    | 0    | 0    |
| 377  | GTCGCTGCTACCGATTGAGTGATCCG  | 629    | 8    | 7    |
| 381  | GTCGCTGCTACCGATTGAGTGGTCCG  | 391    | 0    | 0    |
| 409  | GTCGCTGCTACCGATTGAGTGGTCCG  | 271    | 0    | 0    |
| 423  | GTCGCTGCTACCGATTGAGTGGTCCG  | 813    | 1    | 0    |
| 443  | GTCGCTGCTACCGATTGAGTGATCCG  | 396    | 0    | 0    |
| 445  | GTCGCTGCTACCGATTGAGAGATCCG  | 222    | 0    | 0    |
| 462  | GTCGCTGCTACCGATTGAGTGGTCCG  | 201    | 0    | 0    |
| 465  | GTCGCTGCTACCGATTGAGTATTCCG  | 286    | 0    | 0    |
| 482  | GTCGCTGCTACCGATTGAGAGGTCCG  | 175    | 0    | 0    |



|      |                            |     |   |    |
|------|----------------------------|-----|---|----|
| 484  | GTCGCTGCTACCGATTGAGTGGTCCG | 265 | 0 | 0  |
| 496  | GTCGCTGCTACCGATTGAGTGATCCG | 384 | 0 | 2  |
| 498  | GTCGCTGCTACCGATTGAGTGGTCCG | 195 | 1 | 0  |
| 515  | GTCGCTGCTACCGATTGAGTGGTCCG | 145 | 1 | 0  |
| 566  | GTCGCTGCTACCGATTGAGTGGTCCG | 140 | 0 | 2  |
| 571  | GTCGCTGCTACCGATTTGAGTGTTCC | 115 | 0 | 0  |
| 585  | GTCGCTGCTACCGATTGAGTGGTCCG | 106 | 0 | 0  |
| 625  | GTCGCTGCTACCGATTGAGTGATCCG | 196 | 0 | 0  |
| 628  | GTCGCTGCTACCGATTGAGTGATCCG | 181 | 0 | 0  |
| 629  | GTCGCTGCTACCGATTGAGTGTTCCG | 91  | 0 | 0  |
| 643  | GTCGCTGCTACCGATTGAGTGTTCAG | 85  | 0 | 0  |
| 687  | GTCGCTGCTACCGATTGAGTGGTCCG | 72  | 0 | 0  |
| 695  | GTCGCTGCTACCGATTGAGTGATCCG | 80  | 0 | 0  |
| 712  | GTCGCTGCTACCGATTGAGTGGTCCG | 122 | 0 | 0  |
| 732  | GTCGCTGCTACCGATTGAGTGGTCCG | 94  | 0 | 11 |
| 742  | GTCGCTGCTACCGATTGAGTATTCCG | 166 | 0 | 0  |
| 782  | GTCGCTGCTACCGATTGAGTGGTCCG | 47  | 3 | 0  |
| 803  | GTCGCTGCTACCGATTGAGTGATCCG | 93  | 0 | 2  |
| 816  | GTCGCTGCTACCGATTGAGTGATCCG | 625 | 0 | 0  |
| 821  | GTCGCTGCTACCGATTGAGTGGTCCG | 45  | 0 | 0  |
| 822  | GTCGCTGCTACCGATTGAGTGGTCCG | 40  | 0 | 0  |
| 866  | GTCGCTGCTACCGATTGAGTGATCCG | 571 | 2 | 0  |
| 883  | GTCGCTGCTACCGATTGAGTGGTCCG | 33  | 0 | 0  |
| 935  | GTCGCTGCTACCGATTGAGAGGTCCG | 28  | 0 | 0  |
| 950  | GTCGCTGCTACCGATTGAGTGTTCCG | 34  | 0 | 0  |
| 962  | GTCGCTGCTACCGATTGAGTGATCCG | 80  | 1 | 0  |
| 965  | GTCGCTGCTACCGATTGAGTGATCCG | 25  | 0 | 0  |
| 993  | GTCGCTGCTACCGATTTGAGTGATT  | 23  | 0 | 0  |
| 995  | GTCGCTGCTACCGATTGAGTGTTCCG | 28  | 1 | 6  |
| 1016 | GTCGCTGCTACCGATTGAGTGTTCCG | 22  | 0 | 1  |
| 1024 | GTCGCTGCTACCGATTGAGTGATCCG | 218 | 0 | 0  |
| 1053 | GTCGCTGCTACCGATTGTGTGATCCG | 189 | 2 | 1  |
| 1054 | GTCGCTGCTACCGATTGAGTGATCCG | 230 | 1 | 0  |
| 1079 | GTCGCTGCTACCGATTGAGTGATACG | 349 | 5 | 1  |
| 1118 | GTCGCTGCTACCGATTGAGTGGTCCG | 77  | 0 | 0  |
| 1121 | GTCGCTGCTACCGATGAGTGATCCGG | 133 | 0 | 0  |
| 1170 | GTCGCTTCTACCGATTGAGTGATCCG | 221 | 3 | 1  |
| 1171 | GTCGCTGCTACCGATTGAGTGGTCCG | 14  | 0 | 0  |
| 1173 | GTCGCTGCTACCGATTGAGTGTTCCG | 18  | 0 | 0  |
| 1227 | GTCGCTGCTACCGATTGAGTGATCCG | 61  | 0 | 0  |
| 1228 | GTCGCTGCTACCGATTGAGTGATCCG | 40  | 0 | 0  |
| 1230 | GTTGCTGCTACCGATTGAGTGATCCG | 12  | 0 | 0  |
| 1308 | GTCGCTGCTACCGATTGAGTGGTCCG | 10  | 0 | 0  |
| 1314 | GTCGCTGCTACCGATTAGTGATCCGG | 34  | 0 | 1  |
| 1315 | GTCGCTGCTACCGATTGAGTGGTCCG | 20  | 0 | 0  |
| 1363 | GTCGCTGCTACCGATTGAGTGTTCCG | 14  | 0 | 0  |
| 1416 | ATCGCTGCTACCGATTGAGTGATCTG | 8   | 0 | 0  |
| 1417 | GTCGCTGCTACCGATTGAGTGTTCCG | 12  | 0 | 0  |

|      |                            |      |   |     |
|------|----------------------------|------|---|-----|
| 1481 | GTCGCTGCTACCGATTGAGTGATCCG | 73   | 0 | 0   |
| 1484 | GTCGCTGCTACCGATTGAGTGATCCG | 47   | 0 | 0   |
| 1490 | GTCGCTGCTACCGATTGAGAGATCCG | 7    | 0 | 0   |
| 1564 | GTCGCACCTACCGATTGAATGGTCCG | 18   | 0 | 0   |
| 1565 | GTCGCGCTACCGAGTGAGTGATCCG  | 43   | 1 | 1   |
| 1569 | GTCGCTGCTACCGATTGAGTGATCCG | 19   | 0 | 0   |
| 1570 | GTCGCTGCTACCGATTGAGTGTGACG | 6    | 0 | 0   |
| 1573 | GTCGCTGCTACCGATTGACTGATCCG | 50   | 0 | 0   |
| 1659 | GTCGCTGCTACCAATTGAGTGATCCG | 9    | 2 | 0   |
| 1661 | GTCGCTGCTACCGATTGAGTGATCCG | 225  | 4 | 1   |
| 1663 | GTCGCTGCTACCGATTGAGTGATCCG | 7    | 0 | 0   |
| 1664 | GTCGCTGCTACCGATTGAGTGATCCT | 9    | 0 | 0   |
| 1665 | GTCGCTGCTACCGATTGAGTGGTCCG | 5    | 0 | 0   |
| 1674 | GTCGCTGCTACCGATGAGTGATCCG  | 20   | 0 | 0   |
| 1797 | GTCGCTGCTACCGATTGAGTGATCCG | 4    | 4 | 0   |
| 1798 | GTCGCTGCTACCGATTGAGTGGTCCG | 4    | 0 | 0   |
| 1812 | GTCGCTGCTACAGATTGAGTGATCCG | 8    | 0 | 0   |
| 1813 | GTCGCTGCTACCGATTGAGTGATCCG | 13   | 0 | 0   |
| 1815 | GTCGCTGCTACCGATTGAGTGATCCG | 12   | 1 | 0   |
| 1817 | GTCGCTGCTACCGATTGAGTGGTCCG | 8    | 0 | 0   |
| 1818 | GTCGCTGCTACCGATTGAGTGGTCCG | 5    | 0 | 0   |
| 1819 | GTCGCTGCTACCGATTGAGTGTCCG  | 4    | 0 | 0   |
| 1826 | GTCGCTACTACCGATTGAATGATCCG | 13   | 0 | 1   |
| 1836 | GTCGCTGCTACCGATTAAGTGGTCCG | 4    | 0 | 0   |
| 2014 | GACGCTGCTACCGATTGAGTGATCCG | 27   | 0 | 0   |
| 2020 | GTCGCTGCTACCGATTGAGTGATCCG | 6    | 0 | 0   |
| 2041 | GTCGCTGCTACCGATGAGTGATCCG  | 8    | 0 | 0   |
| 2078 | GTCGCTACTACCGATCGAGTGGTCAG | 7    | 0 | 0   |
| 2241 | GTCGCTGCTACCGATTGAGAGGTCCG | 11   | 0 | 0   |
| 236  | GTCGCTGCTACCGATTGAGTGGTCCG | 1210 | 2 | 16  |
| 306  | GTCGCTGCTACCGATTGAGTGGTCCG | 1140 | 7 | 149 |
| 356  | GTCGCTGCTACCGATTGAGTGGTCCG | 386  | 1 | 2   |
| 1080 | GTCGCTACTACCGATTGAGTGAACG  | 18   | 0 | 0   |
| 1666 | GTCGCTGCTACCGATTGAGTGGTCCG | 5    | 0 | 0   |
| 1820 | GTCGCTGCTACCGATTGGGTGTTCCG | 4    | 0 | 0   |
| 179  | GTCGCTGCTACCGATTGAGTGGTCCG | 2288 | 0 | 0   |
| 182  | GTCGCTGCTACCGATTGAGTGGTCCG | 3912 | 0 | 3   |
| 193  | GTCGCTGCTACCGATTGAGTGGTCCG | 3462 | 0 | 1   |
| 228  | GTCGCTGCTACCGATTGGGTGCTCAG | 1922 | 2 | 49  |
| 494  | GTCGCTGCTACCGATTGAGTGGTCCG | 388  | 0 | 4   |
| 1272 | GTCGCTGCTACCGATTGAGTGATCCG | 20   | 0 | 0   |
| 1369 | GTCGCTGCTACCGATTGAGTGGTCCG | 42   | 0 | 0   |
| 154  | GTCGCTACTACCGATCGAGTGGTCAG | 1913 | 3 | 0   |
| 907  | GTCGCTACTACCGATTGAGTGGTCCG | 36   | 0 | 0   |
| 952  | GTCGCTACTACCGATCGAGTGGTCAG | 49   | 0 | 0   |
| 1842 | GTCGCTACTACCGATCGAGTGGTCAG | 21   | 0 | 0   |
| 2018 | GTCGCTGCTACCGATTGAGTGATCCG | 3    | 0 | 0   |
| 274  | GTCGCTCCTACCGATTTCGAGTGGTA | 717  | 0 | 0   |

|      |                            |       |    |    |
|------|----------------------------|-------|----|----|
| 286  | GTCGCTGCTACCGATTGAGTGGTCCG | 1539  | 2  | 41 |
| 347  | GTCGCTGCTACCGATTGAGTGTTCCG | 588   | 1  | 0  |
| 475  | GTCGCTCCTACCGATTCGAGTGATTC | 380   | 0  | 9  |
| 829  | GTCGCTGCTACCGATTGAGTGGTCCG | 527   | 0  | 1  |
| 906  | GTCGCTGCTACCGATTGAGTGGTCCG | 75    | 0  | 0  |
| 1816 | GTCGCTGCTACCGATTGAGGGGTCCG | 7     | 0  | 0  |
| 33   | GTCGCTGCTACCGATTGAGTGATCCG | 19942 | 81 | 1  |
| 188  | GTCGCTGCTACCGATTGAGTGTTCCG | 1472  | 10 | 5  |
| 205  | GTCGCTGCTACCGATTGAGTGATCCG | 5130  | 11 | 80 |
| 290  | GTCGCTGCTACCGATTGAGTGGTCCG | 1928  | 5  | 19 |
| 307  | GTCGCTGCTACCGATTGAGTGTTCCG | 724   | 0  | 0  |
| 387  | GTCGCTGCTACCGATTGAGTGGTCCG | 410   | 1  | 0  |
| 414  | GTCGCTGCTACCGATTGAGTGGTCCG | 282   | 0  | 0  |
| 677  | GTCGCTCCTACCGATTCGAGAGGTC  | 74    | 0  | 0  |
| 1056 | GTCGCTGCTACCGATGAGTGATGCGE | 19    | 0  | 0  |
| 1257 | GTCGCTCCTACCGATTCGAGTGATCC | 11    | 0  | 0  |
| 1568 | GTCCTGCTACCGATTGAGTGATCCG  | 12    | 0  | 1  |
| 1638 | GTCGCTCCTACCGATTCGAGTGATTC | 5     | 0  | 0  |
| 80   | GTCGCTGCTACCGATTGAGAGGTCCG | 7174  | 4  | 0  |
| 476  | GTCGCTGCTACCGATTGAGTGTTCCG | 180   | 0  | 29 |
| 527  | GTCGCTGCTACCGATTGAGTGGTCCG | 137   | 0  | 0  |
| 590  | GTCGCTGCTACCGATTGAGTATTCCG | 296   | 0  | 0  |
| 669  | GTCGCTGCTACCGATTGAGTGTTCCG | 120   | 0  | 4  |
| 749  | GTCGCTGCTACCGATTGAGTATTGCG | 64    | 0  | 0  |
| 867  | GTCGCTGCTACCGATTGAGTGCAAAG | 35    | 0  | 0  |
| 1364 | GTCGCTGCTACCGATTGAGTGTTGAG | 9     | 0  | 0  |
| 510  | GTCGCTCCTACCGATTCGAGTGATCC | 334   | 0  | 0  |
| 533  | GTCGCTCCTACCGATTCGAGTGATCC | 134   | 0  | 0  |
| 954  | GTCGCTCCTACCGATCGAGTGGTCCG | 26    | 0  | 0  |
| 1001 | GTCGCTCCTACCGATCGAGTGGTCCG | 23    | 0  | 0  |
| 1373 | GTCGCTCCTACCGATTTGAGTGATCA | 9     | 0  | 0  |
| 1585 | GTCGCTCCTACCGATTCGAGTGATTC | 6     | 0  | 0  |
| 330  | GTCGCTCCTACCGATTCGAGTGATCC | 472   | 0  | 0  |
| 383  | GTCGCTCCTACCGATTTGAGTGTTT  | 319   | 0  | 0  |
| 457  | GTCGCTCCTACCGATTCGAGTGATCC | 237   | 0  | 1  |
| 1691 | GTCGCTCCTACCGATTCGAGTGATCC | 5     | 0  | 0  |
| 139  | GTCGCTCCTACCGATTCGAGTGTTCA | 2556  | 0  | 0  |
| 1038 | GTCGCTCCTACCGATTCGAGTGTTCA | 20    | 0  | 0  |
| 1394 | GTCGCTTCTACCGATTCGATTTGTGA | 9     | 0  | 0  |
| 1582 | GTCGCTCCTACCGATTCGAGTGGTCC | 15    | 0  | 0  |
| 708  | GTCGCTCCTACCGATTCGAGTGATCC | 161   | 1  | 0  |
| 916  | GTCGCTCCTACCGATTCGAGTGATCC | 29    | 0  | 0  |
| 395  | GTCGCTGCTACCGATTGAGTGTTCCG | 590   | 4  | 16 |
| 472  | GTCGCTGCTACCGATTGAGTGTTCCG | 222   | 0  | 10 |
| 1036 | GTCGCTGCTACCGATTGAGTGTTCCG | 20    | 0  | 0  |
| 791  | GTCGCTCCTACCGATCGAGTGGTCCG | 46    | 0  | 0  |
| 1180 | GTCGCTCATACCGATTCGAGTCATTT | 14    | 0  | 0  |
| 1320 | GTCGCTCCTACCGATTCGAGTGATCC | 17    | 0  | 0  |

|      |                              |         |      |     |
|------|------------------------------|---------|------|-----|
| 294  | GTCGCTCCTACCGATTTGAGTGGTCC   | 1106    | 0    | 0   |
| 968  | GTCGCTCCTACCGATTTGAGTGGTCC   | 25      | 0    | 0   |
| 0    | GTCGCTCCTACCGATTTGAGTGGTCC   | 1228483 | 0    | 3   |
| 101  | GTCGCTCCTACCGATTTGAGTGGTCC   | 3986    | 0    | 0   |
| 805  | GTCACATCATGAAAGCCGTTTCGAG    | 43      | 0    | 0   |
| 1062 | GTCGCTCCTACCGATTGAGTGATCCG   | 25      | 0    | 0   |
| 1101 | GTCGCTCCTACCGATTGAGTGGTCCG   | 17      | 0    | 0   |
| 1590 | GTCGCTCCTACCGATTGAGTGCTCAG   | 6       | 0    | 0   |
| 1757 | GTCGCTACTACCGATTGAACGTTTTAC  | 11      | 0    | 0   |
| 840  | GTCGCTCCTACCGATCGAGTGGTCCG   | 38      | 0    | 0   |
| 500  | GTCGCTCCTACCGATTTGAGTGCTCT   | 390     | 0    | 0   |
| 534  | GTCGCTCCTACCGATTTGGAATTATCC  | 143     | 3    | 5   |
| 683  | GTCGCTCCTACCGATTTGGAATTATCC  | 73      | 0    | 0   |
| 1205 | GTCGCTCCTACCGATCGAGTGGTCCG   | 13      | 0    | 0   |
| 1277 | GTCGCTCCTACCGATTTGAGTGGTCC   | 11      | 0    | 0   |
| 1503 | GTCGCTACTACCGATTTGAGTGGTCC   | 7       | 0    | 0   |
| 1864 | GTCGCTCCTACCGATTTGAGTGGTCC   | 4       | 0    | 0   |
| 2045 | GTCGCTTCTACCGATTGAGAGGTCCG   | 5       | 0    | 0   |
| 638  | GTCGCTCCTACCGATTTGAGTGATCC   | 86      | 0    | 0   |
| 407  | GTCGCTCCTACCGATTTGAGTGATCC   | 282     | 0    | 0   |
| 1883 | GTCGCACCTACCGATTGAATGGTCCG   | 4       | 0    | 0   |
| 163  | GTCGCTCCTACCGATTGAGTGATCCG   | 1699    | 0    | 0   |
| 824  | GTCGCTCCTACCGATTGAGTGATCCG   | 40      | 0    | 0   |
| 244  | GTCGCTCCTACCGATCGAGTGGTCCG   | 938     | 0    | 7   |
| 412  | GTCGCTCCTACCGATCGAGTGGTCCG   | 445     | 0    | 5   |
| 1098 | GTCGCTCCTACCGATCGAGTGGTCCG   | 26      | 0    | 0   |
| 1426 | GTCGCTCCTACCGATTTGAGTGGTTCC  | 8       | 0    | 0   |
| 18   | GTCGCTCCTACCGATTTTGAAGTGTCC  | 40371   | 0    | 77  |
| 204  | GTCGCTCCTACCGATTTTGAAGTGATCC | 1189    | 0    | 0   |
| 1026 | GTCGCTCCTACCGATTTTGAAGTGTCC  | 106     | 0    | 0   |
| 1278 | GTCGCTCCTACCGATTTTGAAGTGATCC | 11      | 0    | 0   |
| 138  | GTCGCTCCTACCGATCGAGTGGTCCG   | 2322    | 0    | 3   |
| 846  | GTCGCTCCTACCGATTGAGTGGTCCG   | 52      | 0    | 0   |
| 1029 | GTCGCTCCTACCGATTGAGTGTTCG    | 21      | 0    | 0   |
| 1148 | GTCGCTCCTACCGATTGAGTGATCCG   | 15      | 0    | 0   |
| 371  | GTCGCTCCTACCGATTGAGTGATCCG   | 338     | 0    | 0   |
| 778  | GTCGCTCCTACCGATTGAGTGATCCG   | 64      | 0    | 0   |
| 1856 | GTCGCTGCTACCGATTGGATGGTTCT   | 4       | 0    | 0   |
| 2085 | GTCGCTCCTACCGATTGAATGATCCG   | 3       | 0    | 0   |
| 2092 | GTCGTTACTACCGATTGGTGTGCAGG   | 3       | 0    | 0   |
| 132  | GTCGCTCCTACCGATTGAGTGGTTCCG  | 5592    | 135  | 64  |
| 311  | GTCGCTCCTACCGATTGAGTGGTCCG   | 698     | 0    | 0   |
| 1427 | GTCGCTACTACCGATCGAGTGGTCAG   | 28      | 0    | 0   |
| 15   | GTCGCTCCTACCGATTTTGAAGTGTCC  | 75938   | 173  | 142 |
| 21   | GTCGCTCCTACCGATTTTGAAGTGATCC | 36728   | 7    | 5   |
| 24   | GTCGCTCCTACCGATTTTGAAGTGATCC | 32572   | 1303 | 31  |
| 45   | GTCGCTCCTACCGATTTTGAAGTGATCC | 20472   | 15   | 34  |
| 67   | GTCGCTCCTACCGATTTTGAAGTGATCC | 8995    | 812  | 19  |

|      |                             |      |     |    |
|------|-----------------------------|------|-----|----|
| 149  | GTCGCTCCTACCGATTTTGAGTGATCC | 2165 | 0   | 0  |
| 184  | GTCGCTCCTACCGATTTTGAGTGATCC | 4496 | 157 | 33 |
| 217  | GTCGCTCCTACCGATTTTGAGTGATCC | 1098 | 0   | 10 |
| 256  | GTCGCTCCTACCGATTTTGAGTGATCC | 820  | 0   | 2  |
| 321  | GTCGCTCCTACCGATTTTGAGTGATCC | 767  | 0   | 0  |
| 322  | GTCGCTCCTACCGATTTTGAGTGATCC | 725  | 0   | 0  |
| 325  | GTCGCTCCTACCGATTTTGAGTGATCC | 460  | 2   | 0  |
| 328  | GTCGCTCCTACCGATTTTGAGTGATCC | 660  | 0   | 18 |
| 335  | GTCGCTCCTACCGATTTTGAGTGATCC | 823  | 0   | 0  |
| 343  | GTCGCTCCTACCGATTTTGAGTGATCC | 1018 | 0   | 0  |
| 378  | ATCGCTCCTACCGATTTTGAGTGATCC | 695  | 1   | 4  |
| 385  | GTCGCTCCTACCGATTTTGAGTGATCC | 375  | 0   | 0  |
| 410  | GTCGCTCCTACCGATTTTGAGTGATCC | 503  | 0   | 0  |
| 415  | GTCGCTCCTACCGATTTTGAGTGATCC | 261  | 0   | 0  |
| 429  | GTCGCTCCTACCGATTTGAGGGATCC  | 249  | 0   | 0  |
| 432  | GTCGCTCCTACCGATTTTGAGTGATCC | 286  | 2   | 0  |
| 450  | GTCGCTCCTACCGATTTGAGTGATCC  | 229  | 0   | 1  |
| 469  | GTCGCTCCTACCGATTTTGAGTGATCC | 1110 | 16  | 1  |
| 504  | GTCGCTCCTACCGATTTTGAGTGATCC | 154  | 0   | 0  |
| 513  | GTCGCTCCTACCGATTTTGAGTGATCC | 188  | 0   | 2  |
| 523  | GTCGCTCCTACCGATTTTGAGTGATCC | 138  | 0   | 0  |
| 551  | GTCGCTCCTACCGATTTTGAGTGATCC | 287  | 1   | 0  |
| 611  | GTCGCTCCTACCGATTTTGAGTGATCC | 97   | 0   | 0  |
| 655  | GTCGCTCCTACCGATTTTGAGTGATCC | 81   | 0   | 0  |
| 679  | GTCGCTCCTACCGATTTTGAGTGATCC | 74   | 0   | 0  |
| 707  | GTCGCTCCTACCGATTTTGAGTGATCC | 179  | 0   | 0  |
| 750  | GTCGCTCCTACCGATTTTGAGTGATCC | 105  | 0   | 0  |
| 754  | GTCGCTCCTACCGATTTTGAGTGATCC | 55   | 0   | 0  |
| 789  | GTCGCTCCTACCGATTTTGAGTGATCC | 46   | 0   | 0  |
| 830  | GTCGCTCCTACCGATTTTGAGTGATCC | 39   | 0   | 0  |
| 837  | GTCGCTCCTACCGATTTTGAGTGATCC | 45   | 0   | 0  |
| 844  | GTCGCTCCTACCGATTTTGAGTGATCC | 37   | 0   | 0  |
| 845  | GTCGCTCCTACCGATTTGAGTGATCC  | 51   | 0   | 0  |
| 879  | GTCGCTCCTACCGATTTTGAGTGATCC | 48   | 0   | 0  |
| 889  | GTCGCTCCTACCGATTTTGAGTGATCC | 32   | 0   | 0  |
| 917  | GTCGCTCCTACCGATTTTGAGTGATCC | 97   | 0   | 0  |
| 928  | GTCGCTCCTACCGATTTTGAGTGATCC | 43   | 0   | 4  |
| 982  | GTCGCTCCTACCGATTGAGTGATCCG  | 44   | 7   | 0  |
| 996  | GTCGCTCCTACCGATTTTGAGTGATCC | 23   | 0   | 0  |
| 1000 | GTCGCTCCTACCGATTTGAGTGATCC  | 23   | 0   | 0  |
| 1058 | GTCGCTCCTACCGATTTTGAGTGATCC | 19   | 0   | 0  |
| 1095 | GTCGCTCCTACCGATTTTGAGTGATCC | 39   | 0   | 0  |
| 1096 | GTCGCTCCTACCGATTTTGAGTGATCC | 27   | 0   | 0  |
| 1145 | GTCGCTCCTACCGATTTTGAGTGATCC | 15   | 0   | 0  |
| 1176 | GTCGCTCCTACCGATTTTGAGTGATCC | 14   | 0   | 0  |
| 1202 | GTCGCTCCTACCGATTTTGAGTGATCC | 15   | 0   | 0  |
| 1234 | GTCGCTCCTACCGATTTTGAGTGATCC | 21   | 0   | 0  |
| 1321 | GTCGCTCCTACCGATTTTGAGTGATCC | 10   | 0   | 0  |

|      |                             |       |    |     |
|------|-----------------------------|-------|----|-----|
| 1493 | GTCGCTCCTACCGATTTTGGGTGATCC | 24    | 0  | 0   |
| 1684 | GTCGCTCCTACCGATTTTGAGTGATCC | 9     | 3  | 0   |
| 1685 | GTCGCTCCTACCGATTTTGAGTGATTA | 5     | 0  | 0   |
| 1686 | GTCGCTCCTACCGATTTTGAGTGGTCC | 8     | 0  | 0   |
| 75   | GTCGCTCCTACCGATTGAGTGATCCG  | 9222  | 1  | 0   |
| 242  | GTCGCTCCTACCGATTTTGAGTGATCC | 1196  | 1  | 0   |
| 333  | GTCGCTCCTACCGATTGAGTGATCCG  | 432   | 0  | 0   |
| 50   | GTCGCTCCTACCGATTGAGTGATCCG  | 15335 | 33 | 30  |
| 1807 | GTCGCTGCTACCGATTGAGTGATCCG  | 85    | 0  | 0   |
| 764  | GTCGCTCCTACCGATTCGAGTGCCTCC | 56    | 2  | 0   |
| 890  | GTCGCTCCTACCGATTGAGTGGTTGG  | 43    | 0  | 0   |
| 119  | GCCGCTTCTACCGATTCGAGTGGTTCC | 3069  | 0  | 0   |
| 326  | GCCGCTTCTACCGATTCGAGTGGTTCC | 468   | 0  | 0   |
| 1885 | GCCGCTTCTACCGATTCGAGTGGTTCC | 4     | 0  | 0   |
| 143  | GCCGCTCCCATCGATTGAGTGAGTCG  | 2350  | 0  | 0   |
| 36   | GTCGCTCCTACCGATTGAGTGATTCG  | 13297 | 0  | 0   |
| 125  | GTCGCTCCTACCGATTGAGTGATTCG  | 2817  | 0  | 0   |
| 207  | GTCGCTCCTACCGATTGAGTGATTCG  | 1173  | 0  | 0   |
| 623  | GTCGCTCCTACCGATTGAGTGATTCG  | 92    | 0  | 0   |
| 661  | GTCGCTCCTACCGATTGAGTGATTCG  | 174   | 0  | 0   |
| 743  | GTCGCTCCTACCGATTCGAGTGGTTCC | 58    | 0  | 0   |
| 770  | GTCGCTCCTACCGATTGAGTGATTCG  | 63    | 0  | 1   |
| 847  | GTCGCTCCTACCGATTGAGTGATTCG  | 41    | 0  | 0   |
| 1241 | GTCGCTCCTACCGATTGAGTGATTCG  | 12    | 0  | 0   |
| 1501 | GTCGCTCCTACCGATTGAGTGATTCG  | 7     | 0  | 0   |
| 1512 | GCCGCTTCTACCGATTGAGTGGTTCC  | 7     | 0  | 0   |
| 1862 | GTCGCTCCTACCGATTCGAGTGATTC  | 4     | 0  | 0   |
| 1870 | GTCGCTCCTACCGATTCGAGTGGTCC  | 4     | 0  | 0   |
| 1933 | GTCGCTCCTACCGATTTTGAGTTATTA | 3     | 0  | 0   |
| 168  | GTCGCTGCTACCGATTGGGTGTTCCG  | 1770  | 0  | 7   |
| 310  | GTCGCTGCTACCGATTGGGTGTTCCG  | 527   | 0  | 10  |
| 317  | GTCGCTCCTACCGATTGAGGGATTCG  | 467   | 1  | 16  |
| 390  | GTCGCTCCTACCGATTGAGGGATTCG  | 304   | 0  | 4   |
| 564  | GTCGCTCCTACCGATTGAGGGATTCG  | 118   | 0  | 0   |
| 858  | GTCGCTCCTACCGATCGAGTTGGTATC | 47    | 0  | 0   |
| 293  | GTCGCTCCTACCGATTCGAGTGATCC  | 1166  | 0  | 1   |
| 64   | GTCGCTCCTACCGATCGAGTGATCCG  | 8453  | 16 | 27  |
| 135  | GTCGCTCCTACCGATTGAATGGTTCCG | 2944  | 0  | 32  |
| 159  | GTCGCTCCTACCGATTGAGGGATTCG  | 1832  | 0  | 224 |
| 1060 | GTCGCTCCTACCGATCGAGTGGTCCG  | 19    | 0  | 0   |
| 1671 | GTCGCTCCTACCGATCGAGTGATCCG  | 14    | 0  | 0   |
| 1810 | GTCGCACCTACCGATTGAATGGTCCG  | 7     | 0  | 0   |
| 115  | GTCGCTCCTACCGATTGAATGATTCG  | 3249  | 0  | 0   |
| 173  | GTCGCTCCTACCGATTGAATGGTTCCG | 1450  | 0  | 41  |
| 357  | GTCGCTCCTACCGATTGAATGGTTCCG | 382   | 0  | 0   |
| 541  | GTCGCTCCTACCGATTGAATGGTTCCG | 140   | 0  | 0   |
| 653  | GTCGCTCCTACCGATTTTGAGTGCTGT | 139   | 0  | 0   |
| 855  | GTCGCTCCTACCGATTTTGAGTGCTGT | 79    | 0  | 0   |

|      |                            |       |    |    |
|------|----------------------------|-------|----|----|
| 947  | GTCGCTCCTACCGATTGAATGGTTCG | 26    | 0  | 0  |
| 992  | GTCGCTCCTACCGATTCGAGTGATCC | 23    | 0  | 0  |
| 1081 | GTCGCTCCTACCGATTGAATGGTTCG | 18    | 0  | 0  |
| 1554 | GTCGCTCCTACCGATTGAATGGTTCG | 6     | 0  | 0  |
| 1823 | GTCGCTACTACCGATTGAATGGCTTA | 4     | 0  | 0  |
| 980  | GTCGCTGCTACCGATTGAGTGATCCG | 24    | 0  | 0  |
| 532  | GTCGCTGCTACCGATTGAGTGATCCG | 323   | 0  | 0  |
| 1119 | GTCGCTGCTACCGATTGAGTGTTCCG | 23    | 0  | 0  |
| 1352 | GTCGCTCCTACCGATTTGAGTGATCC | 11    | 0  | 0  |
| 71   | GTCGCTCCTACCGATTTGAGTGGTCC | 6476  | 0  | 0  |
| 315  | GTCGCTCCTACCGATTTGAGTGGTCC | 479   | 3  | 0  |
| 696  | GTCGCTCCTACCGATTTGAGTGGTCC | 69    | 0  | 0  |
| 11   | GTCGCTAGTACCGATTTGAGTGGTCC | 86458 | 0  | 13 |
| 19   | GTCGCTAGTACCGATTTGAGTGGTCC | 35723 | 0  | 1  |
| 82   | GTCGCTCCTACCGATTTGAGTGATCC | 6327  | 19 | 11 |
| 192  | GTCGCTCCTACCGATTTGAGTGGTCC | 1301  | 0  | 11 |
| 206  | GTCGCTCCTACCGATTTGAGTGGTCC | 1193  | 0  | 0  |
| 223  | GTCGCTCCTACCGATTTGAGTGGTCC | 1050  | 0  | 0  |
| 255  | GTCGCTCCTACCGATTTGAGTGGTCC | 1244  | 0  | 15 |
| 257  | GTCGCTCCTACCGATTTGAGTGGTCC | 803   | 0  | 0  |
| 278  | GTCGCTAGTACCGATTTGAGTGGTCC | 694   | 1  | 48 |
| 302  | GTCGCTCCTACCGATTTGAGTGGTCC | 523   | 0  | 0  |
| 308  | GTCGCTCCTACCGATTTGAGTGATCC | 654   | 2  | 13 |
| 363  | GTCGCTCCTACCGATTTGAGTGGTCC | 349   | 0  | 15 |
| 364  | GTCGCTCCTACCGATTTGAGTGGTCC | 354   | 0  | 57 |
| 384  | GTCGCTCCTACCGATTTGAGTGGTCC | 494   | 0  | 0  |
| 451  | GTCGCTCCTACCGATTTGAGTGGTCC | 601   | 9  | 0  |
| 520  | GTCGCTCCTACCGATTTGAGTGGTCC | 209   | 0  | 16 |
| 526  | GTCGCTCCTACCGATTTGAGTGGTCC | 165   | 0  | 0  |
| 594  | GTCGCTCCTACCGATTTGAGTGGTCC | 200   | 0  | 2  |
| 610  | GTCGCTCCTACCGATTTGAGTGATCC | 149   | 0  | 0  |
| 787  | GTCGCTCCTACCGATTTGAGTGATCC | 64    | 0  | 0  |
| 878  | GTCGCTAGTACCGATTTGAGTGGTCC | 113   | 0  | 0  |
| 948  | GTCGCTCCTACCGATTTGAGTGATCC | 29    | 0  | 0  |
| 961  | GTCGCTAGTACCGATTTGAGTGGTCC | 63    | 0  | 0  |
| 1116 | GTCGCTCCTACCGATTTGAGTGATCC | 25    | 0  | 0  |
| 1178 | GTCGCTCCTACCGATTTGAGTGGTCC | 14    | 0  | 0  |
| 1224 | GTCGCTCCTACCGATTTGAGTGGTCC | 12    | 0  | 0  |
| 1370 | GTCGCTGCTACCGATTGGATGGTTC  | 9     | 0  | 0  |
| 1408 | GTCGCTACTACCGATTTGAGTGATCC | 48    | 0  | 0  |
| 1411 | GTCGCTCCTACCGATTTGAGTGGTCC | 8     | 0  | 0  |
| 1486 | GTCGCTCCTACCGATTGAATGATCCG | 7     | 0  | 0  |
| 1559 | GTCGCTCCTACCGATTTGAGTGGTCC | 6     | 0  | 0  |
| 1575 | GTCGCTCGTACCGATTTGAGTGGTCC | 15    | 0  | 0  |
| 1672 | GTCGCTCCTACCGATTGAGTGATCCG | 5     | 0  | 0  |
| 1801 | GTCGCTAGTACCGATTGAGTGGTCC  | 7     | 0  | 0  |
| 1802 | GTCGCTAGTACCGATTTGAGTGGTCC | 4     | 0  | 0  |
| 1828 | GTCGCACCTACCGATTGAATGGTCCG | 4     | 0  | 0  |

|      |                             |        |     |    |
|------|-----------------------------|--------|-----|----|
| 1977 | GTCGCTCCTACCGATTTCAATGGTCC  | 3      | 0   | 0  |
| 81   | GTCGCTCCTACCGATTTGAGTGGTCC  | 16476  | 22  | 93 |
| 153  | GTCGCTCCTACCGATTTGGGTGATCC  | 4485   | 20  | 6  |
| 218  | GTCGCTCCTACCGATTTGGGTGATCC  | 2703   | 114 | 3  |
| 300  | GTCGCTCCTACCGATTTGAGTGGTCC  | 561    | 0   | 18 |
| 313  | GTCGCTCCTACCGATTGAGTGGTTGC  | 658    | 0   | 0  |
| 394  | GTCGCTCCTACCGATTTGGGTGATCC  | 627    | 5   | 1  |
| 405  | GTCGCTCCTACCGATTTGAGTGGTCC  | 276    | 0   | 0  |
| 441  | GTCGCTCCTACCGATTTGAGTGGTCC  | 224    | 0   | 0  |
| 453  | GTCGCTCCTACCGATTTGGGTGATCC  | 978    | 0   | 0  |
| 471  | GTCGCTCCTACCGATTTGAGTGGTCC  | 185    | 0   | 0  |
| 477  | GTCGCTCCTACCGATTTGGGTGATCC  | 276    | 0   | 17 |
| 507  | GTCGCTCCTACCGATTTGGGTGATCC  | 149    | 4   | 0  |
| 562  | GTCGCTCCTACCGATTTGAGTGGTCC  | 209    | 0   | 0  |
| 728  | GTCGCTCCTACCGATTTGAGTGGTCC  | 222    | 0   | 0  |
| 755  | GTCGCTCCTACCGATTTGAGTGATCC  | 68     | 0   | 0  |
| 756  | GTCGCTCCTACCGATTTGAGTGATCC  | 56     | 0   | 3  |
| 757  | GTCGCTCCTACCGATTTGGGTGATCC  | 157    | 0   | 20 |
| 762  | GTCGCTCCTACCGATTTGAGTGGTCC  | 53     | 0   | 2  |
| 771  | GTCGCTCCTACCGATTTGGGTGATCC  | 100    | 0   | 0  |
| 835  | GTCGCTCCTACCGATTTGAGTGGTCC  | 226    | 0   | 2  |
| 843  | GTCGCTCCTACCGATTTGAGTGATCC  | 41     | 0   | 0  |
| 856  | GTCGCTCCTACCGATTTGAGTGGTCC  | 39     | 0   | 0  |
| 1032 | GTCGCTCCTACCGATTTGAGTGGTCC  | 33     | 0   | 2  |
| 1318 | GTCGCTCCTACCGATTTGGGTGATCC  | 10     | 0   | 0  |
| 1356 | GTCGCTCCTACCGATTTGAGTGATCC  | 9      | 0   | 0  |
| 1372 | GTCGCTCCTACCGATTTGGGTGATCC  | 9      | 0   | 0  |
| 1401 | GTCGCTCCTACCGATTTGAGTGGTCC  | 8      | 0   | 0  |
| 1403 | GTCGCTCCTACCGATTTGGGTGATCC  | 8      | 0   | 0  |
| 1558 | GTCGCTCCTACCGATTTGAGTGGTCC  | 6      | 0   | 0  |
| 1581 | GTCGCTCCTACCGATTTGGGTGATCC  | 44     | 1   | 0  |
| 1787 | GTCGCTCCTACCGATTTGAGTGATCC  | 4      | 0   | 0  |
| 2    | CGTCGCTCCTACCGATTTGAGTGATCC | 378699 | 0   | 94 |
| 6    | GTCGCTCCTACCGATTTGAGTGATCC  | 147720 | 35  | 98 |
| 40   | GTCGCTCCTACCGATTTGAGTGATCC  | 12962  | 58  | 96 |
| 78   | GTCGCTCCTACCGATTTGAGTGGTCC  | 6224   | 0   | 63 |
| 99   | GTCGCTCCTACCGATTTGAGTGGTCC  | 4177   | 7   | 12 |
| 198  | GTCGCTCCTACCGATTTGAGTGGTCC  | 1370   | 1   | 0  |
| 216  | GTCGCTCCTACCGATTTGAGTGATCC  | 2597   | 13  | 17 |
| 222  | GTCGCTCCTACCGATTTGAGTGATCC  | 3360   | 0   | 13 |
| 231  | GTCGCTCCTACCGATTTGAGTGGTCC  | 1088   | 0   | 0  |
| 246  | GTCGCTCCTACCGATTTGAGTGGTCC  | 2245   | 11  | 4  |
| 258  | GTCGCTCCTACCGATTTGAGTGATCC  | 824    | 0   | 0  |
| 279  | GTCGCTCCTACCGATTTGAGTGATCC  | 1012   | 2   | 0  |
| 340  | GTCGCTCCTACCGATTTGAGTGGTCC  | 426    | 1   | 0  |
| 352  | GTCGCTCCTACCGATTTGAGTGGTCC  | 705    | 59  | 0  |
| 659  | GTCGCTCCTACCGATTTGAGTGGTCC  | 153    | 0   | 0  |
| 864  | GTCGCTCCTACCGATTTGAGTGATCC  | 120    | 0   | 0  |



|      |                            |      |   |    |
|------|----------------------------|------|---|----|
| 1034 | GTCGCTCCTACCGATTTGAGTGGTC  | 33   | 0 | 0  |
| 1093 | GTCGCACCTACCGATTGAATGGTCCG | 17   | 0 | 0  |
| 1117 | GTCGCTCCTACCGATTTGAGTGGTC  | 16   | 0 | 0  |
| 1167 | GTCGCTCCTACCGATTTGAGTGATCC | 14   | 0 | 0  |
| 1195 | GTTGCTCCTACAAATTTGAGTGATCC | 13   | 0 | 0  |
| 1226 | GTCGCTCCTACCGATTTGAGTGATT  | 12   | 0 | 0  |
| 1232 | GTCGCTCCTACTGATTGAGTGGTCCG | 21   | 0 | 0  |
| 1270 | GTCGCACCTACCGATTGAATGGTCCG | 11   | 0 | 0  |
| 1407 | GTCGCTCCTACCGATTTGAGTGATCC | 36   | 0 | 0  |
| 1409 | GTCGCTCCTACCGATTTGAGTGATCC | 63   | 0 | 0  |
| 1472 | GTCGCTCCTACCGATTGCGAGTGATC | 49   | 0 | 0  |
| 1474 | GTCGCTACTACCGATTTGAGTGGTC  | 46   | 0 | 0  |
| 1475 | GTCGCTCCTACCGATTTGAGTGGTC  | 83   | 0 | 0  |
| 1477 | GTCGCTCCTACCGATTTGAGTGGTC  | 7    | 0 | 0  |
| 1649 | GTCGCTCCTACCGATTTGAGTGGTC  | 15   | 0 | 0  |
| 1803 | GTCGCTCCGACCGATTTGAGTGGTC  | 6    | 0 | 0  |
| 1979 | GTCGCTCCTACCGATTTGAGTGATCC | 3    | 0 | 0  |
| 2004 | GTCGCTAGTACCGATTTGAGTGGTC  | 3    | 0 | 0  |
| 915  | GTCGCTCCTACCGATTTGAGTGATCC | 83   | 0 | 0  |
| 1354 | GTCGCTCCTACCGATTTGAGTGATCC | 9    | 0 | 0  |
| 1555 | GTCGCTCCTACCGATTGCGAGTGATC | 31   | 0 | 0  |
| 1969 | GTCGCTCCTACCGATTGCGAGTGATC | 18   | 0 | 0  |
| 401  | GTCGCTCCTACCGATTTGAGTGGTC  | 280  | 0 | 0  |
| 452  | GTCGCTCCTACCGATTTGAGTGGTC  | 218  | 4 | 0  |
| 554  | GTCGCTCCTACCGATTTGAGTGGTC  | 206  | 0 | 0  |
| 912  | GTCGCTCCTACCGATTTGAGTGGTC  | 29   | 0 | 0  |
| 1112 | GTCGCTCCTACCGATTTGAGTGGTC  | 30   | 0 | 0  |
| 1298 | GTCGCTCCTACCGATTTGAGTGGTC  | 17   | 0 | 0  |
| 1351 | GTCGCTCCTACCGATTTGAGTGGTC  | 15   | 0 | 0  |
| 1264 | GTCGCTCCTACCGATTGCGAGTGGTC | 746  | 0 | 29 |
| 828  | GTCGCTCCTACCGATTTGAGTGGTC  | 195  | 0 | 3  |
| 1261 | GTCGCTCCTACCGATTGCGAGTGGTC | 63   | 0 | 8  |
| 1366 | GTCGCTCCTACCGATTTAGAGTGGTC | 248  | 0 | 2  |
| 1476 | GTCGCTCCTACCGATTTGAGTGGTC  | 255  | 0 | 2  |
| 1651 | GTCGCTCCTACCGATTTGAGTGGTC  | 28   | 0 | 2  |
| 1788 | GTCGCTCCTACCGATTGCGAGTGGTC | 10   | 0 | 1  |
| 1791 | GTCGCTCCTACCGATTTGAGTGGTC  | 7    | 0 | 0  |
| 1796 | GCCGCTCCTACCGATTTGAGTGGTC  | 12   | 0 | 1  |
| 1967 | GTCGCTCCTACCGATGTCGAGTGGTC | 9    | 0 | 0  |
| 1983 | GTCGCTCCTACCGATTTGAGTGGTC  | 33   | 0 | 1  |
| 51   | GTCGCTACTCCGATTTGAGTGGTC   | 9744 | 0 | 0  |
| 271  | GTCGCTACTACCGATTTGAGTGGTC  | 721  | 0 | 15 |
| 425  | GTCGCTACTCCGATTTGAGTGGTC   | 249  | 0 | 0  |
| 632  | GTCGCTCCTACCGATTTGAGTGGTC  | 205  | 0 | 7  |
| 686  | GTCGCTACTACCGATTTGAGTGGTC  | 92   | 0 | 0  |
| 1544 | GTCGCTACTACCGATTTGAGTGGTC  | 6    | 0 | 0  |
| 1999 | GTCGCTTCTACCGATTTGAGTGGTC  | 6    | 0 | 0  |
| 2006 | GTCGCTCCGACCGATTTGAGTGGTC  | 7    | 0 | 0  |

|      |                             |        |      |       |
|------|-----------------------------|--------|------|-------|
| 3    | GTCGCTCCTACCGATTTGAGTGGTC   | 357722 | 38   | 14446 |
| 93   | GTCGCTACTACCGATTTGAGTGGTC   | 5259   | 3    | 103   |
| 124  | GTCGCTCCTACCGATTGAATGGTTCG  | 2837   | 0    | 1     |
| 210  | GTCGCTCCTACCGATTTGAGTGGTC   | 1171   | 0    | 0     |
| 461  | GTCGCTCCTACCGATTTGAGTGGTC   | 711    | 0    | 2     |
| 493  | GTCGCTACTACCGATTTGAGTGGTC   | 243    | 0    | 0     |
| 1302 | GTCGCTCCTACCGATTTGAGTGATCC  | 13     | 0    | 0     |
| 1631 | GTCGCTACTACCGATTGAACGTTTTAC | 11     | 0    | 0     |
| 1646 | GTCGCTCCTACCGATTTGAGTGGTC   | 36     | 0    | 2     |
| 1781 | GTCGCTCCTACCGATTGCGAGTGGTC  | 28     | 0    | 3     |
| 1782 | GTCGCTCCTACCGATTGCGAGTGGTC  | 11     | 0    | 0     |
| 1974 | GTCGCTCCTACCGATTTAGAGTGGTC  | 18     | 0    | 1     |
| 436  | GTCGCTACTACCGATTTGAGTGGTC   | 6059   | 0    | 185   |
| 109  | GTCGCTCCTACCGATTTGAGTGGTC   | 3485   | 0    | 0     |
| 57   | GTCGCTATTTCCGATTTGAGTGGTC   | 8377   | 6    | 2     |
| 1023 | GTCGCTCCTACCGATTTGAGTGGTC   | 21     | 0    | 0     |
| 1256 | GTCGCTACTACCGATTTGAGTGGTC   | 11     | 0    | 0     |
| 1304 | GTCGCTCCTACCGATTTGAGTGGTC   | 10     | 1    | 0     |
| 1410 | GTCGCTCCTACCGATTTGAGTGGTC   | 8      | 0    | 0     |
| 130  | GTCGCTATTTCCGATTTGAGTGGTC   | 4723   | 2    | 0     |
| 619  | GTCGCTCCTACCGATTGCGAGTGGTC  | 451    | 0    | 0     |
| 752  | GTCGCTCCTACCGATTTGAGTGGTC   | 55     | 0    | 0     |
| 1656 | GTCGCTATTTCCGATTTGAGTGGTC   | 31     | 0    | 0     |
| 1972 | GTCGCTCCTACCGATTGCGAGTGGTC  | 45     | 0    | 0     |
| 46   | GTCGCTCCTACCGATTTGAGTGGTC   | 19368  | 69   | 76    |
| 857  | GTCGCTACTACCGATTTGAGTGGTC   | 36     | 0    | 0     |
| 1367 | GTCGCTCCTACCGATTGAGTGATCCG  | 9      | 0    | 0     |
| 1    | GTCGCTCCTACCGATTTGAGTGGTC   | 458880 | 4870 | 32    |
| 54   | GTCGCTCCTACCGATTTGAGTGGTC   | 8830   | 0    | 29    |
| 79   | GTCGCTCCTACCGATTTGAGTGGTC   | 17395  | 14   | 284   |
| 110  | GTCGCTCCTACCGATTTGAGTGGTC   | 4868   | 2    | 22    |
| 113  | GTCGCTCCTACCGATTTGAGTGGTC   | 3820   | 1    | 14    |
| 147  | GTCGCTCCTACCGATTTGAGTGGTC   | 4881   | 2    | 5     |
| 220  | GTCGCTCCTACCGATTTGAGTGGTC   | 1173   | 0    | 0     |
| 245  | GTCGCTCCTACCGATTTGAGTGGTC   | 2238   | 95   | 30    |
| 261  | GTCGCTCCTACCGATTTGAGTGGTC   | 1024   | 0    | 2     |
| 336  | GTCGCTCCTACCGATTTGAGTGGTC   | 886    | 0    | 0     |
| 466  | GTCGCTCCTACCGATTTGAGTGGTC   | 197    | 0    | 14    |
| 613  | GTCGCTCCTACCGATTTGAGTGATCC  | 281    | 4    | 0     |
| 720  | GTCGCTCCTACCGATTTGAGTGGTC   | 62     | 0    | 0     |
| 902  | GTCGCTCCTACCGATTTGAGTGGTC   | 30     | 0    | 0     |
| 1650 | GTCGCTCCTACCGATTTGAGTGGTC   | 5      | 0    | 0     |
| 1780 | GTCGCTCCTACCGATTGCGAGTGGGC  | 12     | 0    | 0     |
| 30   | GTCGCTCCTACCGATTTGAGTGGTC   | 19186  | 387  | 0     |
| 58   | GTCGCTCCTACCGATTTGAGTGGTC   | 16335  | 61   | 0     |
| 219  | GTCGCTCCTACCGATTTGAGTGGTC   | 1245   | 4    | 6     |
| 264  | GTCGCTCCTACCGATTTGAGTGGTC   | 744    | 0    | 0     |
| 281  | GTCGCTCCTACCGATTGAGTGGTTCG  | 682    | 0    | 0     |

|      |                             |        |      |       |
|------|-----------------------------|--------|------|-------|
| 1136 | GTCGCTCCTACCGATTTGAGTGGTC   | 28     | 0    | 0     |
| 1199 | GTCGCTCCTACCGATTTGAGTGGTC   | 61     | 10   | 0     |
| 1262 | GTCGCTCCTACCGATTTGAGTGGTC   | 116    | 19   | 0     |
| 1358 | GTCGCTCCTACCGATTTGAGTGGTC   | 185    | 43   | 0     |
| 1632 | GTCGCTACTACCGATTGAACGTTTTAC | 20     | 8    | 0     |
| 1653 | GTCGCTCCTAGCGATTTGAGTGGTC   | 5      | 0    | 0     |
| 2046 | GTCGCTACTACCGATTGAACGTTTTAC | 6      | 1    | 0     |
| 292  | GTCGCTCCTACCGATTTGAGTGGTC   | 1062   | 160  | 0     |
| 624  | GTCGCTCCTACCGATTTGAGTGGTC   | 161    | 3    | 0     |
| 96   | GTCGCTCCTACCGATTTGAGTGGTC   | 7831   | 2    | 0     |
| 433  | GTCGCTACTACCGATTTGAGTGGTC   | 241    | 0    | 0     |
| 508  | GTCGCTACTACCGATTTGAGTGGTC   | 285    | 0    | 1     |
| 959  | GTCGCTACTACCGATTTGAGTGGTC   | 42     | 0    | 0     |
| 1222 | GTCGCTCCTACCGATTTGAGTGGTC   | 70     | 0    | 0     |
| 1639 | GTCGCTCCTACCGATTTGAGTGGTC   | 11     | 0    | 0     |
| 8    | GTCGCTACTACCGATTGAACGTTTTAC | 135653 | 984  | 679   |
| 23   | GTCGCTACTACCGATTTGAGTGGTC   | 26890  | 46   | 2636  |
| 86   | GTCGCTACTACCGATTTGAGTGGTC   | 6337   | 16   | 0     |
| 589  | GTCGCTACTCCGATTTGGGTGATT    | 131    | 0    | 0     |
| 823  | ATCGCTACTACCGATTTGATGTGGTC  | 40     | 0    | 0     |
| 934  | GTCGCTACTACCGATTTGAGTGGTC   | 228    | 0    | 6     |
| 1225 | GTCGCTACTACCGATTTGAGTGGTC   | 42     | 1    | 0     |
| 1271 | GTCGCTACTACCGATTCCGAGTGGTC  | 38     | 1    | 0     |
| 1305 | GTCGCTACTACCGATTTGAGTGGTC   | 29     | 0    | 0     |
| 1310 | GTCGCTACTACCGATTTGAGTGGTC   | 759    | 3    | 18    |
| 1414 | GTCGCTACTACCGATTTGAGTGGTC   | 412    | 7    | 0     |
| 1679 | GTCGCTACTACCGATTGCGAGTGGTC  | 98     | 0    | 4     |
| 1833 | GTCGCACCTACCGATTGAGTGTCCG   | 7      | 0    | 0     |
| 83   | GTCGCTCCTACCGATTTGGGTGGTC   | 6252   | 93   | 240   |
| 88   | GTCGCTCCTACCGATTTGGGTGGTC   | 5045   | 109  | 672   |
| 103  | GTCGCTCCTACCGATTTGGGTGGTC   | 7859   | 73   | 1     |
| 112  | GTCGCTCCTACCGATTTGGGTGGTC   | 3481   | 1    | 3     |
| 164  | GTCGCTCCTACCGATTTGGGTGGTC   | 3404   | 11   | 16    |
| 489  | GTCGCTCCTACCGATTTGGGTGGTC   | 166    | 0    | 0     |
| 739  | GTCGCTCCTACCGATTTGGGTGGTC   | 58     | 0    | 0     |
| 794  | GTCGCTCCTACCGATTTGGGTGGTC   | 45     | 0    | 0     |
| 1466 | GTCGCTCCTACCGATTTGGGTGGCC   | 12     | 0    | 0     |
| 1764 | GTCGCTCCTACCGATTTGGGTGGCC   | 17     | 0    | 0     |
| 12   | GTCGCTCCTACCGATTTGAGTGGTC   | 144110 | 1340 | 22436 |
| 65   | GTCGCTCCTACCGATTTGAGTGGTC   | 14780  | 147  | 2676  |
| 66   | GTCGCTCCTACCGATTTGAGTGGTC   | 13273  | 0    | 2238  |
| 91   | GTCGCTCCTACCGATTTGAGTGGTC   | 4915   | 0    | 1     |
| 128  | GTCGCTCCTACCGATTTGAGTGCTCC  | 3676   | 9    | 254   |
| 561  | GTCGCTACTACCGATTTGAGTGGTC   | 120    | 0    | 0     |
| 615  | GTCGCTCCTACCGATTTGAGTGGTC   | 95     | 0    | 0     |
| 776  | GTCGCTCCTACCGATTTGAGTGGTC   | 150    | 1    | 17    |
| 1074 | GTCGCTCCTACCGATTTGAGTGGTC   | 133    | 0    | 1     |
| 1165 | GTCGCTCCTACCGATTTGAGTGGTC   | 52     | 0    | 31    |

|      |                              |       |     |     |
|------|------------------------------|-------|-----|-----|
| 1166 | GTCGCTCCTACCGATTGAGTGATCCG(  | 25    | 0   | 11  |
| 1223 | GTCGCTCCTACCGATTTGAGTGGTC(   | 184   | 0   | 0   |
| 1404 | GTCGCTGCTAACGATTTGGAGTGGTC   | 8     | 0   | 0   |
| 1545 | GTCGCTCCTACCGATTTGAGTGGTC(   | 19    | 0   | 0   |
| 1546 | GTCGCTCCTACCGATTTGAGTGGTC(   | 20    | 0   | 5   |
| 1641 | GTAACCTCCTACCGATTTCAAGTGGTC( | 5     | 0   | 0   |
| 1761 | GTCGCTCCTACCGATTTGAGTGGTC(   | 32    | 0   | 8   |
| 1762 | GTCGCTCCTACCGATTTGAGTGGTC(   | 43    | 1   | 6   |
| 1769 | GTTGCTCCTACCGATTTTGAAGTGGTC( | 4     | 0   | 0   |
| 1771 | GTCGCTCCTACCGATTTGAGTGGTC(   | 53    | 1   | 12  |
| 1943 | GTCGCTCCTACCGATTGCGAGTGGTC(  | 12    | 0   | 3   |
| 247  | GTCGCTCCTACCGATTTGAGTGGTC(   | 903   | 0   | 0   |
| 499  | GTCGCTCCTACCGATTTGAGTGGTC(   | 158   | 0   | 0   |
| 1013 | GTCGCTCCTACCGATTTGAGTGGTC(   | 38    | 0   | 0   |
| 180  | GTCGCTCCTACCGATTTGAGTGGTC(   | 1398  | 212 | 138 |
| 186  | GTCGCTCCTACCGATTTGAGTGGTC(   | 1371  | 2   | 0   |
| 229  | GTCGCTCCTACCGATTTGAGTGGTC(   | 1004  | 2   | 43  |
| 269  | GTCGCTCCTACCGATTTGAGTGGTC(   | 757   | 0   | 0   |
| 319  | GTCGCTCCTACCGATTTGAGTGGTC(   | 1082  | 0   | 1   |
| 338  | GTCGCTCCTACCGATTGAGTGGTTCG(  | 425   | 0   | 0   |
| 597  | GTCGCTCCTACCGATTTGAGTGGTC(   | 101   | 0   | 0   |
| 658  | GTCGCTCCTACCGATTTGAGTGGTT(   | 79    | 0   | 0   |
| 738  | GTCGCTCCTACCGATTTGAGTGGTC(   | 58    | 0   | 0   |
| 945  | GTCGCTCCTACCGATTTGAGTGGTT(   | 26    | 0   | 0   |
| 1162 | GTCGCTCCTACCGATTTGAGTGGTC(   | 14    | 0   | 0   |
| 17   | GTCGCTCCTACCGATTTGAGTGGTC(   | 42110 | 5   | 153 |
| 53   | GTCGCTCCTACCGATTTGAGTGGTC(   | 9024  | 40  | 107 |
| 426  | GTCGCTCCTACCGATTTGAGTGGTC(   | 374   | 0   | 0   |
| 587  | GTCGCTCCTACCGATTGAGTGGTTCG(  | 213   | 0   | 0   |
| 810  | GTCGCTCCTACCGATTTGAGTGGTC(   | 93    | 0   | 0   |
| 123  | GTCGCTCCTACCGATTTGAGTGGTC(   | 6365  | 0   | 6   |
| 238  | GTCGCTCCTACCAATTTGAGTGGTC(   | 1947  | 0   | 1   |
| 689  | GTCGCTCCTACCAATTTGAGCGGCT(   | 75    | 0   | 0   |
| 841  | GTCGCTCCTACCGATTTGAGTGATC(   | 38    | 0   | 0   |
| 1005 | GTCGCTCCTACCGATTTGAGTGGTT(   | 48    | 0   | 0   |
| 1747 | GTCGCTCCTACCAATTTGAGCGGCT(   | 4     | 0   | 0   |
| 1886 | GTCGCTCCTACCGATTTGAGTGGTC(   | 4     | 0   | 0   |
| 2106 | GTCGCTACTACCAATTTGAGTGGCT(   | 3     | 0   | 0   |
| 938  | GTCGCTACTACCGATTGAACGTTTTAC( | 27    | 0   | 0   |
| 1125 | GTCGCTCCTACCGATTGAGTGACCCG(  | 17    | 0   | 0   |
| 1711 | GTCGCTACTACCGATTGAACGTTTTAC( | 10    | 0   | 0   |
| 1861 | GTCGCTCCTACCAATAGGGTGACTTG(  | 4     | 0   | 0   |
| 72   | GTCGCTCCTACCGATTTGAGTGATCC(  | 6743  | 0   | 44  |
| 106  | GTCGCTCCTACCGATTTGAGTGATCC(  | 4702  | 1   | 0   |
| 323  | GTCGCTCCTACCGATTTGGGTGATCC(  | 455   | 120 | 2   |
| 896  | GTCGCTCCTACCGATTTGAGTGATCC(  | 31    | 0   | 0   |
| 924  | GTCGCTCCTACCGATTTGAGTGATCC(  | 28    | 0   | 0   |
| 1175 | GTCGCTCCTACCAATTTGAGTGGTC(   | 23    | 0   | 0   |

|      |                              |       |     |      |
|------|------------------------------|-------|-----|------|
| 1580 | GTCGCTCCTACCAATTCGAGTGGCTC   | 6     | 0   | 0    |
| 2050 | GTCGCTCCTACCGATTGAGTGGTTCG/  | 3     | 0   | 0    |
| 16   | GTCGCTACTACCGATCGAGTGGTCAG   | 82356 | 71  | 153  |
| 27   | GTCGCTACTACCGATTTTCGAGTGGTC/ | 31935 | 28  | 7807 |
| 31   | GTCGCTACTACCGATCGAGTGGTCAG   | 23102 | 38  | 225  |
| 61   | GTCGCTACTACCGATTGAGTGGTCAG   | 10706 | 0   | 2    |
| 68   | GTCGCTACTACCGATTGAGTGGTCAG   | 8467  | 48  | 103  |
| 77   | GTCGCTACTACCGATTGAGTGGTCAG   | 14710 | 39  | 40   |
| 92   | GTCGCTACTACCGATTGAGTGGTCAG   | 5206  | 15  | 4    |
| 108  | GTCGCTATTTCCGATTTTCGAGTGGTCC | 4047  | 500 | 5    |
| 117  | GTCGCTACTACCGATTTTCGAGTGGTC/ | 3321  | 0   | 0    |
| 131  | GTCGCTACTACCGATTGAGTGATCCG/  | 3779  | 1   | 11   |
| 150  | GTCGCTACTACCGATCGAGTGGTCAG   | 4063  | 0   | 1    |
| 162  | GTCGCTACTACCGATCGAGTGGTCAG   | 3142  | 0   | 0    |
| 166  | GTCGCTACTACCGATCGAGTGGTCAG   | 9212  | 15  | 52   |
| 172  | GTCGCTACTACCGATTGAGTGGTCAG   | 2246  | 0   | 26   |
| 175  | GTCGCTACTACCGATTGAGTGGTCAG   | 1575  | 0   | 0    |
| 183  | GTCGCTACTACCGATCGAGTGGTCAG   | 2290  | 5   | 23   |
| 209  | GTCGCTACTACCGATCGAGTGGTCAG   | 4785  | 21  | 0    |
| 213  | GTCGCTACTACCGATTGAGTGGCCAG   | 1120  | 0   | 9    |
| 230  | GTCGCTACTACCGATTGAGTGGTCAG   | 1002  | 0   | 1    |
| 233  | GTCGCTACTACCGATCGAGTGGCTAG   | 1068  | 0   | 0    |
| 249  | GTCGCTACTACCGATCGAGTGGTCAG   | 2006  | 0   | 87   |
| 250  | GTCGCTACTACCGATCGAGTGGTCAG   | 1556  | 0   | 0    |
| 273  | GTCGCTACTACCGATCGAGTGGTCAG   | 710   | 0   | 0    |
| 282  | GTCGCTACTACCGATCGAGTGGTCAG   | 2919  | 5   | 0    |
| 289  | GTCGCTACTACCGATCGAGTGGTCAG   | 1200  | 0   | 0    |
| 295  | GTCGCTACTACCGATTGAGTGGTCAG   | 588   | 0   | 0    |
| 305  | GTCGCTACTACCGATTGAGTGGTCAG   | 525   | 0   | 0    |
| 344  | GTCGCTACTACCGATCGAGTGGTCAG   | 486   | 1   | 294  |
| 353  | GTCGCTACTACCGATCGAGTGGTCAG   | 388   | 0   | 0    |
| 389  | GTCGCTACTACCGATTGAGTGGTCAG   | 430   | 0   | 0    |
| 440  | GTCGCTACTACCGATCGAGTGGTCAG   | 223   | 0   | 0    |
| 447  | GTCGCTACTACCGATTGAGTGGTCAG   | 493   | 0   | 1    |
| 483  | GTCGCTACTACCGATTGAGTGGTCAG   | 494   | 7   | 26   |
| 486  | GTCGCTACTACCGATTGAGTGGTCAG   | 201   | 0   | 0    |
| 547  | GTCGCTACTACCGATCGAGTGGTCAG   | 325   | 0   | 0    |
| 569  | GTCGCTACTACCGATCGAATGGTCAG   | 116   | 0   | 0    |
| 576  | GTCGCTACTACCGATCGAGTGGTCAG   | 113   | 0   | 0    |
| 591  | GTCGCTACTACCGATTGAGTGGTCAG   | 103   | 0   | 0    |
| 630  | GTCGCTACTACCGATTGAGTGGTCAG   | 92    | 0   | 0    |
| 631  | GTCGCTACTACCGATTGAGTGGTCAG   | 88    | 0   | 0    |
| 646  | GTCGCTACTACCGATCGAGTGGTCAG   | 176   | 0   | 1    |
| 668  | GTCGCTACTACCGATTGAGTGGTCAG   | 77    | 0   | 0    |
| 706  | GTCGCTACTACCGATTGAGTGGTCAG   | 65    | 0   | 0    |
| 721  | GTCGCTACTACCGATTGAGTGGTCAG   | 155   | 1   | 0    |
| 724  | GTCGCTACTACCGATCGAGTGGTCAG   | 61    | 0   | 0    |
| 733  | GTCGCTACTACCGATCGAGTGGTCAG   | 59    | 0   | 0    |

|      |                            |       |    |    |
|------|----------------------------|-------|----|----|
| 737  | GTCGCTATTTCCGATTTGAGTGGTCC | 58    | 0  | 0  |
| 753  | GTCGCTACTACCGATTGAATGGTCAG | 68    | 0  | 2  |
| 758  | GTCGCTACTACCGATCGAGTGGTCAG | 132   | 0  | 0  |
| 796  | GTCGCTACTACCGATCGAGTGGTCAG | 64    | 0  | 0  |
| 804  | GTCGCTACTACCGATTGAGTGGTCAG | 43    | 0  | 0  |
| 817  | GTCGCTACTACCGATCGAGTGGTCAG | 54    | 0  | 0  |
| 838  | GTCGCTACTACCGATGAATGGTCAGG | 38    | 0  | 0  |
| 884  | GTCGCTACTACCGATCGAGTGGTCAG | 33    | 0  | 0  |
| 919  | GTCGCTACTACCGATCGAGTGGCCAG | 189   | 1  | 1  |
| 964  | GTCGCTACTACCGATCGAATGGTCAG | 29    | 0  | 0  |
| 967  | GTCGCTACTACCGATTGAATGGTCAG | 25    | 0  | 0  |
| 990  | GTCGCTACTACCGATTGAGTAGGTAG | 23    | 0  | 0  |
| 1025 | GTCGCTACTACCGATTGAGTGGTCAG | 39    | 0  | 0  |
| 1057 | GTCGCTACTACCGATCGAGTGGTCAG | 36    | 0  | 0  |
| 1085 | GTCGCTACTACCGATCGAGTGATCCG | 23    | 0  | 0  |
| 1094 | GTCGCTACTACCGATCGAGTGATCAG | 32    | 0  | 0  |
| 1114 | GTCGCTACTACCGATCGAGTGGTCAG | 40    | 0  | 0  |
| 1120 | GTCGCTACTACCGATTGAGTGGTCAG | 32    | 0  | 0  |
| 1201 | GTCGCTACTACCGATCGAATGGTCAG | 24    | 0  | 0  |
| 1235 | GTCGCTACTACCGATCGAGTGGTCAG | 12    | 0  | 0  |
| 1236 | GTCGCTACTACCGATCGAGTGGTCAG | 14    | 0  | 0  |
| 1312 | GTCGCTACTACCGATCGAATGGTCAG | 10    | 0  | 0  |
| 1317 | GTCGCTACTACCGATCGAGTGATCAG | 15    | 0  | 0  |
| 1378 | GTCGCTACTACCGATCGAGTGATCAG | 17    | 0  | 0  |
| 1380 | GTCGCTACTACCGATCGAGTGTTAAG | 9     | 0  | 0  |
| 1384 | GTCGCTACTACCGATCGAGTGGTCAG | 15    | 0  | 0  |
| 1418 | GTCGCTACTACCGATTGAGTGGTCAG | 14    | 0  | 0  |
| 1429 | GTCGCTACTACCGATCGAGTGGTCAG | 15    | 0  | 0  |
| 1492 | GTCGCTACTACCGATCGAGTGGTCAG | 24    | 0  | 1  |
| 1553 | GTCGCTACTACCGATTGAATGGTTCA | 12    | 1  | 0  |
| 1566 | GTCGCTACTACCGATCGAATGGTCAG | 6     | 0  | 0  |
| 1680 | GTCGCTACTACCGATCGAGTGGTCAG | 5     | 0  | 0  |
| 1683 | GTCGCTACTACCGATCGAGTGATCTG | 5     | 0  | 0  |
| 1768 | GTCGCTACTACCGATGTCGAGTGGTC | 4     | 0  | 0  |
| 1843 | GTCGCTACTACCGATTGAATGGTCAG | 26    | 0  | 1  |
| 1848 | GTCGCTACTACCGATCGAGTGGTCAG | 7     | 0  | 0  |
| 1953 | GTCGCTACTACCGATTGGGTGATCAG | 3     | 0  | 0  |
| 2062 | GTCGCTACTACCGATCGAGTGGTCAG | 3     | 0  | 0  |
| 2067 | GTCGCTACTACCGATCGAGTGGTCAG | 9     | 0  | 0  |
| 2068 | GTCGCTACTACCGATCGAGTGGTCAG | 11    | 0  | 0  |
| 2070 | GTCGCTACTACCGATTGAGTGGTCAG | 23    | 0  | 0  |
| 2073 | GTCGCTACTACCGATTGAATGGCTAA | 5     | 0  | 0  |
| 2082 | GTCGCTACTACCGATCGAGCGGTGTC | 6     | 0  | 0  |
| 2083 | GTCGCTACTACCGATCGAGTGGTAAG | 3     | 0  | 0  |
| 41   | GTCGCTCCTACCGATTTGAGTGGTCC | 18311 | 71 | 15 |
| 201  | GTCGCTCCTACCGATTTGAGTGGTCC | 1873  | 0  | 18 |
| 456  | GTCGCTCCTACCGATCGAGTGATCCG | 207   | 0  | 0  |
| 831  | GTCGCTCCTACCGATTGAGTGATCCG | 71    | 2  | 0  |

|      |                             |        |     |       |
|------|-----------------------------|--------|-----|-------|
| 887  | GTCGCTCCTACCGATTTGAGTGGTCC  | 32     | 0   | 0     |
| 1133 | GTCGCTCCTACCGATTGAGTGATCCG  | 15     | 0   | 6     |
| 1973 | GTCGCTCCTACCGATTTGAGTGGCC   | 6      | 0   | 0     |
| 165  | GTCGCTCCTACCGATTTGAGTGGTCC  | 2445   | 0   | 15    |
| 458  | GTCGCTCCTACCGATTTGAGTGGTCC  | 216    | 0   | 0     |
| 505  | GTCGCTCCTACCGATTTGAGTGGTCC  | 149    | 1   | 0     |
| 802  | GTCGCTCCTACCGATTTGAGTGGTCC  | 43     | 0   | 0     |
| 1078 | GTCGCTCCTACCGATTTGAGTGGTCC  | 18     | 0   | 0     |
| 5    | GTCGCTCCTACCGATTTGAGTGGTCC  | 162306 | 16  | 5172  |
| 9    | GTCGCTCCTACCGATTTGAGTGGTCC  | 418737 | 942 | 15610 |
| 29   | GTCGCTACTACCGATTTGAGTGGTCC  | 24891  | 1   | 339   |
| 34   | GTCGCTACTACCGATTTGAGTGGTCC  | 15056  | 54  | 0     |
| 48   | GTCGCTCCTACCGATTTGAGTGGTCC  | 21748  | 109 | 1037  |
| 76   | GTCGCTCCTACCGATTTGAGTGGTCC  | 6692   | 34  | 128   |
| 97   | GTCGCTCCTACCGATTTGAGTGGTCC  | 4400   | 0   | 153   |
| 122  | GTCGCTCCTACCGATTTGAGTGGTCC  | 3867   | 5   | 99    |
| 152  | GTCGCTACTACCGATTTGAGTGGTCC  | 2267   | 4   | 3     |
| 212  | GTCGCTCCTACCGATTTGAGTGGTCC  | 1423   | 3   | 34    |
| 221  | GTCGCTCCTACCGATTTGAGTGGTCC  | 1074   | 0   | 14    |
| 237  | GTCGCTCCTACCGATTTGAGTGGTCC  | 1320   | 0   | 45    |
| 262  | GTCGCTCCTACCGATTTGAGTGGTCC  | 1463   | 36  | 75    |
| 362  | GTCGCTCCTACCGATTTGAGTGGTCC  | 979    | 2   | 75    |
| 379  | GTCGCTCCTACCGATTTGAGTGGTCC  | 541    | 0   | 3     |
| 417  | GTCGCTCCTACCGATTTGAGTGGTCC  | 262    | 166 | 3     |
| 540  | GTCGCTCCTACCGATTTGAGTGGTCC  | 268    | 0   | 0     |
| 557  | GTCGCTCCTACCGATTTGAGTGGTCC  | 484    | 0   | 2     |
| 601  | GTCGCTCCTACCGATTTGAGTGGTCC  | 182    | 1   | 10    |
| 627  | GTCGCTCCTACCGATTTGAGTGGTCC  | 1622   | 2   | 52    |
| 636  | GTCGCTCCTACCGATTGCGAGTGGTCC | 1005   | 0   | 89    |
| 663  | GTCGCTCCTACCGATTTGAGTGGTCC  | 78     | 0   | 1     |
| 667  | GTCGCTCCTACCGATTTGAGTGGTCC  | 216    | 1   | 2     |
| 671  | GTCGCTCCTACCGATTTGAGTGGTCC  | 112    | 5   | 0     |
| 699  | GTCGCTCCTACCGATTTGAGTGGTCC  | 569    | 2   | 29    |
| 793  | GTCGCTCCTACCGATTTGAGTGGTCC  | 211    | 1   | 7     |
| 795  | GTCGCTCCTACCGACTTGAGTGGTCC  | 45     | 0   | 0     |
| 814  | GTCGCTCCTACCGATTTGAGTGGTCC  | 41     | 0   | 0     |
| 826  | GTCGCTCCTACCGATTTGAGTGGTCC  | 131    | 0   | 1     |
| 832  | GTCGCTCCTACCGATTTGAGTGGTCC  | 230    | 0   | 24    |
| 833  | GTCGCTCCTACCGATTTGAGTGGTCC  | 48     | 0   | 8     |
| 834  | GTCGCTCCTACCGATTTGAGTGGTCC  | 98     | 0   | 5     |
| 895  | GTCGCTCCTACCGATTTGAGTGGTCC  | 39     | 0   | 0     |
| 903  | GTCGCTCCTACCGATTTGAGTGGTCC  | 44     | 9   | 0     |
| 946  | GTCGCTCCTACCGATTTGAGTGGTCC  | 64     | 0   | 0     |
| 978  | GTCGCTCCTACCGATTTGAGTGGTCC  | 24     | 7   | 0     |
| 1021 | GTCGCTCCTACCGATTTGAGTGGTCC  | 85     | 0   | 1     |
| 1033 | GTCGCTCCTACCGATTTGAGTGGTCC  | 26     | 0   | 0     |
| 1050 | GTCGCTCCTACCGATTTGAGTGGTCC  | 109    | 0   | 2     |
| 1073 | GTCGCTCCTACCGATTGAGTGGTCCG  | 18     | 0   | 0     |

|      |                             |      |   |    |
|------|-----------------------------|------|---|----|
| 1075 | GTCGCTCCTACCGATTTGAGTGGTCC  | 18   | 0 | 0  |
| 1091 | GTCGCTCCTACCGATTTGAGTGGTCC  | 1118 | 6 | 37 |
| 1134 | GTCGCTCCTACCGATTTGAGTGGTCC  | 37   | 0 | 0  |
| 1137 | GTCGCTCCTACCGATTTGATTGGTCC  | 23   | 0 | 0  |
| 1140 | GTCGCTCCTACCGATTTGAGTGGTCC  | 15   | 0 | 0  |
| 1163 | GTCGCTCCTACCGATTTGAGTGGTCC  | 187  | 0 | 23 |
| 1164 | ATCGCTCCTACCGATTTCAAGTGGTCT | 17   | 0 | 0  |
| 1191 | GTCGCTCCTACCGATTTGAGTGGTCC  | 1155 | 6 | 43 |
| 1194 | GTCGCTCCTACCGATTTGAGTGATCC  | 39   | 0 | 0  |
| 1221 | GTCGCTCCTACCGATTTGAGTGGTCC  | 25   | 0 | 0  |
| 1294 | GTCGCTCCTACCGATTTGAGTGGCG   | 44   | 0 | 0  |
| 1296 | GTCGCTCCTACCGATTTGAGTGGTCC  | 115  | 0 | 0  |
| 1299 | GTCGCTCCTACCGATTTGAGTGGTCC  | 23   | 0 | 0  |
| 1350 | GTCGCTCCTACCGATTTGAGTGGTCC  | 214  | 0 | 7  |
| 1398 | GTCGCTCCTACCGATTTGAGTGGTCC  | 8    | 0 | 0  |
| 1399 | GTCTCTCCTACCGATTTGAGTGGTCC  | 177  | 1 | 1  |
| 1402 | GTCGCTCCTACCGATTTGAGTGGTCC  | 16   | 0 | 0  |
| 1405 | GTCGCTCCTACCGATTGAATGATCCG  | 8    | 0 | 0  |
| 1460 | GTCGCTCCTACCGATTTGAGTGGTCC  | 92   | 0 | 3  |
| 1465 | GTCGCTCCTACCGATTTGAGTGGTCC  | 36   | 0 | 0  |
| 1468 | GTCGCACCTACCGATTGAATGGTCCG  | 11   | 0 | 0  |
| 1469 | GTCGCTCCTACCGATTTGAGTGGTCC  | 7    | 0 | 0  |
| 1478 | GTCGCTCCTACCGATTTGAGTGGTCC  | 56   | 1 | 0  |
| 1543 | GTCGCTCCTACCGATTTGAGTGGTCC  | 88   | 0 | 18 |
| 1557 | GTCGCTCCTACCGATTTGAGTGGTCC  | 19   | 0 | 0  |
| 1561 | GTCGCTGCTACCGATTGGATGGTTCTC | 6    | 0 | 0  |
| 1576 | GTCGCTCCTACCGATTGAGTGATCCG  | 8    | 0 | 1  |
| 1636 | GTCGCTCCTACCGATTGAGTGGTCCG  | 5    | 0 | 0  |
| 1643 | GTCGCTGCTACCGATTGGATGGTTCTC | 5    | 0 | 0  |
| 1749 | GTCGCTCCTACCGATTGCGAGTGGTCC | 36   | 0 | 2  |
| 1750 | GTCGCTCCTACCGATTTGAGTGGTCC  | 11   | 0 | 1  |
| 1751 | GTCGCTCCTACCGATTTGAGTGGTCC  | 15   | 0 | 1  |
| 1752 | GTCGCTCCTACCGATTTGAGTGGTCC  | 15   | 0 | 0  |
| 1760 | GTCGCTCCTAACAATTTCAATGGTCC  | 4    | 0 | 0  |
| 1765 | GTCGCTCCTACCGATTTGAGTGGTCC  | 4    | 0 | 0  |
| 1772 | GTCGCTCCTACCGATTGAATGATCCG  | 4    | 0 | 0  |
| 1774 | GTCGCTCCTACCGATTTGATTGGTCT  | 4    | 1 | 3  |
| 1786 | GTCGCACCTACCGATTGAATGGTCCG  | 4    | 0 | 0  |
| 1917 | GTCGCTCCTACCGATTTGAGTGGTCC  | 9    | 0 | 1  |
| 1918 | GTCGCTCCTACCGATTGCGAGTGGTCC | 6    | 0 | 1  |
| 1921 | GTCGCTCCTACCGATTTGAGTGATCC  | 6    | 0 | 0  |
| 1922 | GTCGCTCCTACCGATTTGAGTGGGC   | 21   | 0 | 5  |
| 1924 | GTCGCTCCTACCGATTTGAGTGGTCC  | 78   | 0 | 3  |
| 1927 | GTCGCTCCTACCGATTTGAGTGGTCC  | 9    | 0 | 1  |
| 1930 | GTCGCTCCTACCGATTTGAGTGGTCC  | 12   | 0 | 0  |
| 1931 | GTCGCTCCTACCGATTTGAGTGGTCC  | 18   | 1 | 2  |
| 1940 | TTCGCTCCTACCGATTTGAGTGGTCC  | 3    | 0 | 0  |
| 1947 | ATCGCTCCTACCGATTTGAGTGGTCC  | 18   | 0 | 0  |



|      |                             |        |      |      |
|------|-----------------------------|--------|------|------|
| 1260 | GTCGCTCCTACCGATTGAGTGGTCCG  | 11     | 0    | 0    |
| 43   | GTCGCTCCTACCGATTTGAGTGGTCC  | 33330  | 273  | 585  |
| 84   | GTCGCTCCTACCGATTTGAGTGGTCC  | 15012  | 14   | 176  |
| 100  | GTCGCTCCTACCGATTTGAGTGGTCC  | 4377   | 26   | 107  |
| 121  | GTCGCTCCTACCGATTTGAGTGGTCC  | 2982   | 2    | 0    |
| 137  | GTCGCTATTTCCGATTTGAGTGGTCC  | 3260   | 18   | 37   |
| 156  | GTCGCTATTTCCGATTTGAGTGGTCC  | 2111   | 0    | 93   |
| 285  | GTCGCTTATACCGATTTGAGTGGTCC  | 1062   | 13   | 15   |
| 314  | GTCGCTACTACCGATTTGAGTGGTCC  | 476    | 9    | 0    |
| 329  | GTCGCTCCTACCGATTTGAGTGGTCC  | 6005   | 7    | 119  |
| 411  | GTCGCTACTACCGATTTGAGTGGTCC  | 327    | 0    | 32   |
| 424  | GTCGCTCCTACCGATTTGAGTGGTCC  | 433    | 0    | 46   |
| 467  | GTCGCTCCTACCGATTTGAGTGGTCC  | 261    | 0    | 0    |
| 618  | GTCGCTCCTACCGATTTGAGTGGTCC  | 93     | 0    | 0    |
| 693  | GTCGCTCCTACCGATTTGAGTGGTCC  | 75     | 0    | 1    |
| 716  | GTCGCTCCTACCGATTTGAGTGGTCC  | 63     | 0    | 0    |
| 808  | GTCGCTCCTACCGAGTTCGAGTGGTCC | 2679   | 5    | 12   |
| 861  | GTCGCTCCTACCGATTTGAGTGGTCC  | 243    | 0    | 12   |
| 944  | GTCGCTCCTACCGATTTGAGTGGTCC  | 61     | 0    | 2    |
| 1092 | GTCGCTCCTACCGATTTGAGTGTTCC  | 59     | 1    | 0    |
| 1192 | GTCGCTCCTACCGATTTGAGTGGTCC  | 199    | 0    | 1    |
| 1255 | GTCGCTCCTACCGATTTGAGTGGTCC  | 273    | 1    | 2    |
| 1295 | GTCGCTCCTACCGATTTGAGTGGTCC  | 129    | 0    | 10   |
| 1297 | GTCGCTCCTACCGATTTGAGTGGTCC  | 20     | 0    | 0    |
| 1353 | GTCGCTCCAACCGATTTCAATTGGACC | 9      | 0    | 0    |
| 1461 | GTCGCTCCTACCGATTTGAGTGGTCC  | 78     | 0    | 1    |
| 1542 | GTCGCTCCTACCGATTTGAGTGGTCC  | 6      | 0    | 0    |
| 1634 | GTCGCTCCTACCGATTTGAGTGGTCC  | 73     | 0    | 1    |
| 1635 | GTCGCTCCTACCGATTTGAGTGGTCC  | 28     | 0    | 0    |
| 1754 | GTCGCTCCTACCGATTTGAGTGGTCC  | 28     | 0    | 0    |
| 1759 | GTCGCTACTACCGATTTGAGTGGTCC  | 11     | 0    | 0    |
| 1763 | GTCGCTCCTACCGATTTGAGTGTCCT  | 4      | 0    | 0    |
| 1775 | GTCGCTGCTACCGATTGGATGGTTCTC | 4      | 0    | 0    |
| 1925 | GTCGCTCCTACCGATTTGAGTGGTCC  | 41     | 0    | 0    |
| 1926 | GTCGCTCCTACCGATTTGAGTGGTCC  | 26     | 0    | 0    |
| 1963 | GTCGCTGCTACCGATTGGATGGTTCTC | 3      | 0    | 0    |
| 10   | GTCGCTACTACCGATTTGAGTGGTCC  | 171655 | 1835 | 1390 |
| 155  | GTCGCTACTACCGATTTGAGTGGTCC  | 2046   | 0    | 55   |
| 202  | GTCGCTACTACCGATTTGAGTGGTCC  | 1207   | 0    | 0    |
| 203  | GTCGCTACTACCGATTTGAGTGGTCC  | 1192   | 0    | 0    |
| 312  | GTCGCTATTTCCGATTTGAGTGGTCC  | 487    | 0    | 4    |
| 367  | GTCGCTACTACCGATCGAATGGTCAG  | 345    | 0    | 0    |
| 421  | GTCGCTATTTCCGATTTGAGTGGTCC  | 252    | 0    | 0    |
| 422  | GTCGCTACTACCGATTTGAGTGGTCC  | 315    | 0    | 0    |
| 544  | GTCGCTACTACCGATTGAATGGTTCA  | 131    | 0    | 0    |
| 642  | GTCGCTACTACCGATTGAACGTTTTAC | 99     | 1    | 0    |
| 1012 | GTCGCTACTACCGATTGCGAGTGGTCC | 111    | 2    | 0    |
| 1052 | GTCGCTACTACCGATTTGAGTGGTCC  | 71     | 0    | 46   |

|      |                             |       |     |     |
|------|-----------------------------|-------|-----|-----|
| 1138 | GTCGCTACTACCGATTTCGAATGGTC/ | 67    | 1   | 0   |
| 1174 | GTCGCTACTACCGATCGAGTGGTCAG  | 21    | 0   | 0   |
| 1258 | GTCGCTACTACCGATTTGAGTGGTC(  | 225   | 0   | 112 |
| 1266 | GTCGCTACTACCGATTGAATGGCTTA( | 11    | 0   | 0   |
| 1267 | GTCGCTACTACCGATTGATGTGCAGG  | 11    | 0   | 0   |
| 1301 | GTCGCTACTACCGATTTGGAGGGGTC  | 34    | 1   | 0   |
| 1413 | GTCGTTACTACCGATTGGTGTGCAGG  | 22    | 0   | 0   |
| 1471 | GTCGCTCCTACCGATTGAGTGATCCG( | 11    | 0   | 0   |
| 1480 | GTCGCTACTACCGATTGAATAACAGG  | 7     | 0   | 0   |
| 1640 | GTCGCTAGTACCGATTTGAGTGGTC(  | 17    | 0   | 0   |
| 1770 | GTCGCTACTACCGATTTGAGTGGTC/  | 62    | 0   | 0   |
| 1830 | GTCGCTACTACCGATCGAGTGATCAG  | 4     | 0   | 0   |
| 1942 | GTCGCTACTACCGATTGCGAGTGGTC. | 6     | 0   | 0   |
| 1954 | GTCGCTACTACCGATTTGAGTGGTC/  | 57    | 0   | 28  |
| 1956 | GTCGCTACTACCGATTTGAGTGGTC/  | 12    | 0   | 0   |
| 1980 | GTCGCACCTACCGATTGAATGGTCCG  | 3     | 0   | 0   |
| 2001 | GTCGCTACTACCGATTGAATGGTTTA( | 3     | 0   | 0   |
| 370  | GTCGCTCCTACCGATTTGAGTGATCC  | 342   | 0   | 9   |
| 614  | GTCGCTCCTACCGATTTGAGTGATG(  | 96    | 0   | 0   |
| 645  | GTCGCTCCTACCGATTTGAGTGATCC  | 89    | 0   | 0   |
| 748  | GTCGCTCCTACCGATTTGAGTGATCC  | 56    | 0   | 0   |
| 225  | GTCGCTACTACCGATTGAGTGATCCG( | 1270  | 0   | 0   |
| 548  | GTCGCTCCTACCGATTTGAGTGATCC  | 166   | 0   | 0   |
| 731  | GTCGCTACTACCGATTGAGTGATCCG( | 69    | 0   | 0   |
| 1633 | GTCGCTCCTACCGATTTGAGTGATCC  | 5     | 0   | 0   |
| 1113 | GTCGCTCCTACCGATTTGAGTGGTC(  | 16    | 0   | 0   |
| 98   | GTCGCTCCTACCGATTTGAGTGATCC  | 4061  | 0   | 0   |
| 1115 | GTCGCTCCTACCGATTTGAGTGATCC  | 16    | 0   | 0   |
| 140  | GTCGCTCCTACCGATTTGAGTGATCC  | 2334  | 106 | 9   |
| 372  | GTCGCTCCTACCGATTTGAGTGGTC(  | 457   | 25  | 7   |
| 572  | GTCGCTCCTACCGATTTGGGTGATCC  | 144   | 1   | 0   |
| 904  | GTCGCTCCTACCGATTTGAGTGATCC  | 30    | 0   | 0   |
| 1642 | GTCGCTCCTACCGATTTGAATGTTCC  | 5     | 0   | 0   |
| 59   | GTCGCTCCTACCGATTTGAGTGGTC(  | 10903 | 70  | 4   |
| 1789 | GTCGCTACTACCGATTTGAGTGGTC(  | 45    | 0   | 0   |
| 144  | GTCGCTCCTACCGATTTGAGTGGTC(  | 2226  | 81  | 5   |
| 399  | GTCGCTCCTACCGATTTGAGTGATCC  | 305   | 0   | 0   |
| 455  | GTCGCTCCTACCGATTTGAGTGGTC(  | 207   | 0   | 0   |
| 637  | GTCGCTCCTACCGATTTGAGTGGTC(  | 107   | 0   | 0   |
| 711  | GTCGCTCCTACCGATTTGAGTGGTC(  | 67    | 0   | 0   |
| 746  | GTCGCTCCTACCGATTTGAGTGGTC(  | 57    | 0   | 0   |
| 1412 | GTCGCTCCTACCGATTTGAGTGTTCC  | 21    | 0   | 0   |
| 118  | GTCGCTCCTACCGATTTGGGTGATCC  | 4318  | 15  | 3   |
| 700  | GTCGCTCCTACCGATTTGAGTGATCC  | 222   | 0   | 0   |
| 176  | GTCGCTCCTACCGATTGCGAGTGGTC( | 1506  | 1   | 0   |
| 1652 | GTCGCTCCTACCGATTTGGGTGATCC  | 8     | 0   | 0   |
| 87   | GTCGCTCCTACCGATTTGGGTGATCC  | 4931  | 0   | 0   |
| 239  | GTCGCTCCTACCGATTTGAGTGGTC(  | 2228  | 0   | 28  |

|      |                             |       |      |     |
|------|-----------------------------|-------|------|-----|
| 1779 | GTCGCTCCTACCGATGAGGGATCCGG  | 4     | 0    | 0   |
| 38   | GTCGCTCCTACCGATTGAATACATTGC | 13270 | 123  | 5   |
| 160  | GTCGCTCCTACCGATTTGAGTGATCC  | 3843  | 5    | 25  |
| 442  | GTCGCTCCTACCGATTTGGGGTGATCC | 221   | 0    | 40  |
| 641  | GTCGCTCCTACCGATTTGGGGTGATCC | 85    | 0    | 9   |
| 865  | GTCGCTCCTACCGATTTGGGGTGATCC | 49    | 0    | 0   |
| 1139 | GTCGCTCCTACCGATTTGAGTGATCC  | 29    | 0    | 0   |
| 1422 | GTCGCTCCTACCGATTTGGGGTGATCC | 8     | 0    | 0   |
| 1306 | GTCGCTCCTACCGATTTGAGTGATCC  | 10    | 0    | 0   |
| 52   | GTCGCTCCTACCGATTGAGTGGTTCCG | 9596  | 136  | 101 |
| 55   | GTCGCTCCTACCGATTTGAGTGATCC  | 9011  | 1036 | 23  |
| 196  | GTCGCTCCTACCGATTTGAGTGATCC  | 1273  | 0    | 0   |
| 501  | GTCGCTCCTACCGATTTGAGTGATCC  | 153   | 0    | 0   |
| 506  | GTCGCTCCTACCGATTTGAGTGATCC  | 163   | 0    | 15  |
| 719  | GTCGCTCCTACCGATTTGAGTGATCC  | 62    | 0    | 0   |
| 740  | GTCGCTCCTACCGATTTGAGTGATCC  | 58    | 0    | 0   |
| 747  | GTCGCTCCTACCGATTTGAGTGATCC  | 56    | 0    | 0   |
| 763  | GTCGCTCCTACCGATTTGAGTGATCC  | 53    | 0    | 1   |
| 862  | GTCGCTCCTACCGATTTGAGTGATCC  | 35    | 0    | 0   |
| 875  | GTCGCTCCTACCGATTTGAGTGATCC  | 34    | 0    | 0   |
| 933  | GTCGCTCCTACCGATTTGAGTGATCC  | 36    | 0    | 0   |
| 1263 | GTCGCTCCTACCGATTTGAGTGATCC  | 11    | 0    | 0   |
| 1265 | GTCGCTCCTACCGATTTGAGTGGTCC  | 11    | 0    | 0   |
| 1406 | GTCGCTCCTACCGATTCAAGTGATCC  | 8     | 0    | 0   |
| 1473 | GTCGCTCCTACCGATTTGAGTGATCC  | 7     | 0    | 0   |
| 1637 | GTCGCTCCTACCGATTTGAGTGATCC  | 5     | 0    | 0   |
| 1785 | GTCGCTCCTACCGATTTGAGTGATCC  | 8     | 0    | 0   |
| 1978 | GTCGCTCCTACCGATTTGAGTGATCC  | 12    | 0    | 0   |
| 1784 | GTCGCTCCTACCGATTTGAGTGATCC  | 4     | 0    | 0   |
| 348  | GTCGCTCCTACCGATTTGAGTGATCC  | 426   | 0    | 0   |
| 1491 | GTCGCTCCTACCGATTTGAGTGATCC  | 10    | 0    | 0   |
| 621  | GTCGCTCCTACCGATTTGAGTGATCC  | 131   | 0    | 3   |
| 960  | GTCGCTCCTACCGATTTGAGTGATCC  | 25    | 0    | 0   |
| 1400 | GTCGCTCCTACCGATTTGAGTGATCC  | 8     | 0    | 0   |
| 148  | GTCGCTCCTACCGATTTGAGTGATCC  | 2131  | 0    | 4   |
| 227  | GTCGCTCCTACCGATTTGAGTGGTCC  | 1028  | 0    | 0   |
| 877  | GTCGCTCCTACCGACTTGAGTGGTCC  | 34    | 0    | 0   |
| 1689 | GTCGCTCCTACCGATTGAGTGGTTTCC | 42    | 0    | 0   |
| 95   | GTCGCTCCTACCGATTTGAGTGTTCC  | 4154  | 0    | 1   |
| 151  | GTCGCTCCTACCGATTTGAGTGATCC  | 2031  | 0    | 0   |
| 284  | GTCGCTCCTACCGATTTGAGTGATCC  | 1116  | 0    | 2   |
| 393  | GTCGCTCCTACCGATTTGAGTGATCC  | 345   | 0    | 0   |
| 761  | GTCGCTCCTACCGATTTGAGTGATCC  | 53    | 0    | 0   |
| 775  | GTCGCTCCTACCGATTTGAGTGATCC  | 94    | 0    | 0   |
| 863  | GTCGCTCCTACCGATTTGAGTGATCC  | 35    | 0    | 0   |
| 876  | GTCGCTCCTACCGATTTGAGTGATCC  | 34    | 0    | 1   |
| 1076 | GTCGCTCCTACCGATTTGAGTGATCC  | 18    | 0    | 0   |
| 1464 | GTCGCCCCTACCGATTCCGAGTGATCC | 12    | 0    | 0   |

|      |                              |       |    |     |
|------|------------------------------|-------|----|-----|
| 345  | GTCGCTCCTACCGATGAGTGATCCGG   | 425   | 0  | 13  |
| 1732 | GTCGCTCCTACCGATTGAGTGATTCG(  | 5     | 0  | 0   |
| 2259 | GTCGCACCTACCGATTGAATGGTCCG(  | 3     | 0  | 0   |
| 190  | GTCGCTCCTACCGATTTGAGTGGTC/   | 1440  | 0  | 0   |
| 1102 | GTCGCTACTACCGATTGAACGTTTTAC( | 29    | 0  | 0   |
| 1854 | GTCGCTCCTACCGATTTGAGTGATG/   | 4     | 0  | 0   |
| 185  | GTCGCTCCTACCGATTGGGTGATGCG   | 2957  | 0  | 362 |
| 633  | GTCGCTCCTACCGATTGGATGATGCG   | 88    | 0  | 0   |
| 735  | GTCGCTCCTACCGATTGGATGATGCG   | 113   | 0  | 1   |
| 1432 | GTCGCTCCTACCGATTGGGTGATGCG   | 8     | 0  | 0   |
| 1502 | GTCGCTCCTACCGATTTGAGTGATTA/  | 21    | 0  | 0   |
| 1387 | GTCGCTCCTACCGATTGAGTGGTCCG(  | 18    | 0  | 0   |
| 650  | GTCGCTCCTACCGATTTGAGTGTGC/   | 178   | 0  | 0   |
| 1911 | GTCGCACCTACCGATTGAGTGATCCG(  | 4     | 0  | 0   |
| 60   | GTCGCTCCTACCGATTTGAGTGATC/   | 22059 | 13 | 334 |
| 760  | GTCGCTCCTACCGATTTGAGTGACT/   | 66    | 0  | 0   |
| 892  | GTCGCTCCTACCGATTTGAGTGATC/   | 32    | 0  | 1   |
| 901  | GTCGCTCCTACCGATTGAGTGTTCCG(  | 36    | 0  | 0   |
| 1069 | GTCGCTCCTACCGATTTGAGTGTGC/   | 39    | 0  | 2   |
| 1106 | GTCGCTCCTACCGATTTGAGTGATTA/  | 17    | 0  | 0   |
| 1519 | GTCGCTCCTACCGATTGAGTGATCCG(  | 7     | 0  | 0   |
| 1614 | GTCGCTCCTACCGATTGGATGTGCTG(  | 6     | 0  | 0   |
| 1720 | GTCGCTCCTACCGATTTGAGTGATC/   | 98    | 0  | 0   |
| 1721 | GTCGCTCCTACCGATTTGAGTGATC/   | 10    | 0  | 0   |
| 2160 | GTCGCTCCTACCGATTTGAGTGATC/   | 6     | 0  | 0   |
| 2267 | GTCGCTCCTACCGATTTGAGTGATC/   | 48    | 0  | 1   |
| 1287 | GTCGCTCCTACCGATTTGAGTGTAC/   | 15    | 0  | 0   |

| 7.SUR | 7.DCM | 9.SUR | 9.DCM | 11.SUR | 16.SUR | 16.DCM |    |
|-------|-------|-------|-------|--------|--------|--------|----|
| 0     | 0     | 0     | 0     | 0      | 0      | 0      | 0  |
| 0     | 0     | 0     | 0     | 0      | 0      | 1      | 0  |
| 0     | 0     | 0     | 0     | 0      | 0      | 0      | 0  |
| 0     | 0     | 0     | 0     | 0      | 0      | 0      | 0  |
| 0     | 0     | 0     | 0     | 0      | 0      | 0      | 0  |
| 0     | 0     | 0     | 0     | 0      | 0      | 0      | 0  |
| 0     | 0     | 0     | 0     | 0      | 0      | 0      | 0  |
| 0     | 0     | 0     | 0     | 0      | 0      | 0      | 0  |
| 0     | 1     | 0     | 0     | 0      | 0      | 0      | 0  |
| 0     | 0     | 6     | 67    | 53     | 0      | 0      | 0  |
| 0     | 0     | 0     | 0     | 0      | 0      | 0      | 3  |
| 0     | 0     | 0     | 0     | 0      | 0      | 0      | 0  |
| 0     | 1     | 0     | 0     | 1      | 0      | 0      | 0  |
| 0     | 0     | 0     | 0     | 0      | 0      | 0      | 0  |
| 0     | 0     | 0     | 0     | 0      | 0      | 0      | 0  |
| 0     | 0     | 0     | 0     | 2      | 0      | 0      | 4  |
| 0     | 0     | 0     | 0     | 0      | 0      | 0      | 0  |
| 0     | 0     | 5     | 11    | 11     | 0      | 1      | 43 |
| 115   | 473   | 16    | 45    | 45     | 57     | 19     | 85 |
| 1     | 0     | 3     | 0     | 0      | 0      | 0      | 0  |
| 0     | 0     | 1     | 1     | 1      | 0      | 1      | 2  |
| 0     | 0     | 0     | 0     | 0      | 0      | 0      | 0  |
| 0     | 0     | 0     | 0     | 0      | 0      | 0      | 0  |
| 0     | 0     | 0     | 0     | 0      | 0      | 0      | 1  |
| 0     | 0     | 2     | 0     | 0      | 0      | 0      | 0  |
| 0     | 0     | 0     | 0     | 0      | 0      | 0      | 0  |
| 0     | 0     | 0     | 0     | 0      | 0      | 0      | 0  |
| 0     | 0     | 0     | 0     | 0      | 0      | 0      | 0  |
| 0     | 0     | 0     | 0     | 0      | 0      | 0      | 0  |
| 0     | 0     | 0     | 0     | 0      | 0      | 0      | 0  |
| 0     | 0     | 1     | 0     | 0      | 0      | 0      | 0  |
| 0     | 0     | 0     | 0     | 0      | 0      | 0      | 0  |
| 1     | 0     | 0     | 0     | 0      | 0      | 0      | 0  |
| 0     | 72    | 1     | 5     | 5      | 0      | 0      | 9  |
| 0     | 0     | 0     | 0     | 0      | 0      | 0      | 0  |
| 0     | 0     | 0     | 0     | 0      | 0      | 0      | 0  |
| 0     | 0     | 0     | 0     | 0      | 0      | 0      | 0  |
| 6     | 660   | 336   | 0     | 0      | 0      | 46     | 0  |
| 80    | 12    | 8068  | 37    | 37     | 1      | 162    | 3  |
| 8     | 5     | 0     | 0     | 0      | 0      | 2      | 0  |
| 0     | 0     | 0     | 0     | 0      | 0      | 0      | 9  |
| 0     | 52    | 11    | 91    | 91     | 1      | 6      | 37 |
| 3     | 1034  | 0     | 1     | 1      | 2      | 0      | 0  |
| 2     | 0     | 0     | 0     | 0      | 0      | 3      | 0  |
| 0     | 31    | 0     | 1     | 1      | 2      | 4      | 3  |
| 0     | 199   | 1     | 21    | 21     | 6      | 1      | 81 |
| 0     | 0     | 0     | 0     | 0      | 0      | 0      | 11 |
| 0     | 310   | 2     | 12    | 12     | 0      | 0      | 14 |



|   |    |     |     |   |   |   |
|---|----|-----|-----|---|---|---|
| 0 | 0  | 0   | 0   | 0 | 0 | 0 |
| 0 | 0  | 0   | 0   | 2 | 0 | 0 |
| 0 | 0  | 0   | 0   | 0 | 0 | 0 |
| 0 | 0  | 6   | 0   | 0 | 0 | 0 |
| 0 | 0  | 0   | 0   | 0 | 0 | 0 |
| 0 | 1  | 92  | 22  | 2 | 0 | 0 |
| 0 | 0  | 0   | 0   | 0 | 0 | 0 |
| 0 | 0  | 0   | 0   | 0 | 0 | 0 |
| 0 | 0  | 0   | 0   | 0 | 0 | 0 |
| 0 | 0  | 0   | 0   | 0 | 0 | 0 |
| 0 | 0  | 0   | 0   | 0 | 0 | 0 |
| 0 | 0  | 0   | 0   | 0 | 0 | 0 |
| 0 | 0  | 0   | 0   | 0 | 0 | 0 |
| 0 | 0  | 0   | 0   | 0 | 0 | 0 |
| 0 | 0  | 0   | 0   | 0 | 0 | 0 |
| 0 | 4  | 0   | 0   | 0 | 0 | 0 |
| 0 | 15 | 0   | 3   | 0 | 0 | 0 |
| 0 | 0  | 0   | 0   | 0 | 0 | 0 |
| 0 | 0  | 0   | 0   | 0 | 0 | 0 |
| 3 | 25 | 138 | 0   | 0 | 0 | 0 |
| 0 | 0  | 0   | 0   | 0 | 0 | 0 |
| 0 | 0  | 0   | 0   | 0 | 0 | 0 |
| 0 | 0  | 35  | 416 | 0 | 0 | 3 |
| 0 | 1  | 0   | 3   | 0 | 1 | 0 |
| 0 | 0  | 0   | 3   | 0 | 0 | 0 |
| 0 | 13 | 0   | 2   | 2 | 4 | 6 |
| 0 | 0  | 0   | 0   | 0 | 0 | 0 |
| 2 | 1  | 0   | 0   | 0 | 1 | 0 |
| 0 | 0  | 0   | 0   | 1 | 2 | 9 |
| 0 | 0  | 0   | 0   | 0 | 0 | 0 |
| 0 | 0  | 0   | 0   | 0 | 0 | 1 |
| 0 | 0  | 0   | 0   | 0 | 0 | 0 |
| 0 | 0  | 0   | 0   | 0 | 0 | 0 |
| 0 | 0  | 0   | 0   | 0 | 0 | 0 |
| 0 | 0  | 0   | 0   | 0 | 0 | 0 |
| 0 | 0  | 0   | 0   | 0 | 0 | 0 |
| 0 | 0  | 0   | 3   | 0 | 0 | 2 |
| 0 | 0  | 4   | 0   | 0 | 0 | 0 |
| 0 | 0  | 242 | 0   | 0 | 3 | 0 |
| 0 | 0  | 0   | 0   | 0 | 0 | 0 |
| 0 | 0  | 0   | 0   | 0 | 0 | 0 |
| 0 | 0  | 0   | 1   | 0 | 0 | 0 |
| 0 | 2  | 0   | 10  | 0 | 0 | 0 |
| 0 | 0  | 0   | 1   | 0 | 0 | 0 |
| 0 | 0  | 0   | 0   | 0 | 0 | 0 |
| 0 | 0  | 0   | 0   | 0 | 0 | 0 |
| 0 | 0  | 0   | 0   | 0 | 0 | 0 |
| 0 | 0  | 0   | 0   | 0 | 0 | 0 |
| 0 | 0  | 0   | 0   | 0 | 0 | 0 |
| 0 | 0  | 0   | 0   | 0 | 0 | 0 |
| 0 | 2  | 0   | 1   | 0 | 0 | 0 |

|      |      |     |     |      |   |    |
|------|------|-----|-----|------|---|----|
| 0    | 0    | 0   | 2   | 0    | 0 | 0  |
| 0    | 0    | 0   | 0   | 0    | 0 | 0  |
| 0    | 8    | 8   | 123 | 2    | 1 | 49 |
| 0    | 0    | 0   | 0   | 0    | 1 | 0  |
| 0    | 0    | 8   | 0   | 0    | 0 | 0  |
| 0    | 0    | 0   | 0   | 0    | 0 | 0  |
| 0    | 0    | 0   | 0   | 0    | 0 | 0  |
| 0    | 0    | 0   | 0   | 0    | 0 | 0  |
| 0    | 0    | 0   | 0   | 0    | 0 | 0  |
| 0    | 0    | 0   | 0   | 0    | 4 | 0  |
| 0    | 1    | 1   | 5   | 2    | 0 | 46 |
| 0    | 0    | 0   | 0   | 0    | 0 | 6  |
| 0    | 9    | 243 | 16  | 0    | 1 | 11 |
| 0    | 0    | 0   | 0   | 0    | 0 | 0  |
| 0    | 96   | 1   | 13  | 7    | 0 | 57 |
| 0    | 0    | 0   | 0   | 0    | 1 | 0  |
| 0    | 0    | 0   | 1   | 0    | 0 | 4  |
| 0    | 42   | 0   | 8   | 0    | 0 | 19 |
| 0    | 0    | 0   | 0   | 0    | 0 | 0  |
| 0    | 0    | 0   | 1   | 0    | 0 | 1  |
| 1    | 2    | 30  | 2   | 0    | 0 | 0  |
| 0    | 0    | 0   | 0   | 0    | 0 | 0  |
| 0    | 0    | 0   | 0   | 0    | 0 | 0  |
| 0    | 0    | 0   | 0   | 0    | 0 | 1  |
| 0    | 0    | 2   | 0   | 0    | 0 | 1  |
| 0    | 0    | 0   | 0   | 0    | 0 | 0  |
| 0    | 0    | 0   | 0   | 0    | 0 | 0  |
| 0    | 0    | 0   | 0   | 0    | 0 | 0  |
| 0    | 0    | 7   | 0   | 9    | 0 | 0  |
| 0    | 0    | 0   | 0   | 0    | 0 | 0  |
| 0    | 0    | 1   | 2   | 0    | 0 | 0  |
| 0    | 0    | 0   | 0   | 0    | 0 | 0  |
| 0    | 0    | 0   | 0   | 0    | 0 | 0  |
| 0    | 0    | 0   | 0   | 0    | 0 | 2  |
| 12   | 23   | 12  | 0   | 0    | 0 | 0  |
| 0    | 7    | 0   | 3   | 2    | 0 | 9  |
| 0    | 0    | 0   | 1   | 0    | 0 | 0  |
| 0    | 0    | 0   | 0   | 0    | 0 | 3  |
| 0    | 0    | 0   | 0   | 0    | 0 | 0  |
| 0    | 0    | 0   | 0   | 0    | 0 | 0  |
| 0    | 0    | 0   | 0   | 0    | 1 | 0  |
| 0    | 0    | 0   | 0   | 0    | 0 | 1  |
| 0    | 0    | 0   | 0   | 0    | 0 | 0  |
| 0    | 0    | 0   | 0   | 0    | 0 | 0  |
| 1937 | 5835 | 537 | 3   | 3030 | 0 | 3  |
| 0    | 3    | 37  | 0   | 0    | 0 | 10 |
| 0    | 31   | 2   | 61  | 0    | 1 | 0  |
| 0    | 0    | 0   | 0   | 0    | 0 | 0  |
| 0    | 0    | 3   | 32  | 0    | 0 | 0  |
| 0    | 0    | 0   | 81  | 0    | 0 | 0  |



|    |    |     |    |     |   |    |
|----|----|-----|----|-----|---|----|
| 0  | 0  | 0   | 1  | 0   | 0 | 0  |
| 0  | 0  | 0   | 0  | 0   | 0 | 0  |
| 81 | 7  | 0   | 0  | 0   | 0 | 0  |
| 0  | 0  | 0   | 0  | 0   | 0 | 0  |
| 0  | 0  | 0   | 0  | 0   | 0 | 0  |
| 0  | 1  | 0   | 0  | 0   | 0 | 0  |
| 0  | 0  | 0   | 0  | 0   | 8 | 0  |
| 0  | 0  | 0   | 0  | 0   | 0 | 0  |
| 0  | 0  | 0   | 0  | 0   | 0 | 0  |
| 0  | 0  | 0   | 0  | 0   | 0 | 0  |
| 0  | 2  | 0   | 0  | 0   | 0 | 0  |
| 0  | 0  | 0   | 0  | 0   | 0 | 0  |
| 0  | 0  | 0   | 0  | 0   | 0 | 0  |
| 0  | 0  | 3   | 1  | 0   | 0 | 0  |
| 0  | 0  | 0   | 0  | 0   | 0 | 0  |
| 0  | 0  | 0   | 0  | 0   | 0 | 0  |
| 0  | 0  | 0   | 0  | 0   | 0 | 0  |
| 0  | 0  | 0   | 0  | 0   | 0 | 0  |
| 0  | 0  | 0   | 0  | 0   | 0 | 0  |
| 0  | 3  | 0   | 0  | 0   | 0 | 1  |
| 3  | 0  | 5   | 0  | 0   | 0 | 0  |
| 0  | 4  | 2   | 5  | 1   | 0 | 5  |
| 0  | 0  | 0   | 0  | 0   | 0 | 0  |
| 80 | 10 | 907 | 0  | 442 | 8 | 2  |
| 3  | 2  | 0   | 1  | 2   | 0 | 0  |
| 0  | 0  | 0   | 0  | 0   | 0 | 0  |
| 0  | 0  | 0   | 0  | 0   | 0 | 0  |
| 0  | 0  | 10  | 0  | 3   | 0 | 0  |
| 0  | 0  | 0   | 0  | 0   | 0 | 0  |
| 0  | 0  | 0   | 0  | 4   | 0 | 0  |
| 0  | 0  | 0   | 0  | 0   | 0 | 0  |
| 0  | 0  | 0   | 0  | 0   | 0 | 0  |
| 0  | 4  | 0   | 0  | 1   | 0 | 0  |
| 0  | 0  | 0   | 0  | 0   | 0 | 0  |
| 0  | 0  | 0   | 0  | 0   | 0 | 0  |
| 0  | 0  | 148 | 0  | 0   | 0 | 0  |
| 9  | 5  | 42  | 22 | 4   | 1 | 58 |
| 1  | 5  | 6   | 1  | 0   | 0 | 7  |
| 91 | 0  | 0   | 0  | 6   | 0 | 9  |
| 0  | 0  | 0   | 0  | 0   | 0 | 0  |
| 0  | 0  | 0   | 0  | 1   | 0 | 8  |
| 0  | 0  | 0   | 34 | 0   | 0 | 0  |
| 0  | 0  | 0   | 0  | 0   | 0 | 0  |
| 0  | 0  | 0   | 0  | 0   | 0 | 0  |
| 0  | 0  | 0   | 0  | 0   | 0 | 0  |
| 0  | 0  | 0   | 2  | 0   | 0 | 0  |
| 0  | 0  | 0   | 1  | 0   | 0 | 0  |
| 0  | 0  | 0   | 0  | 0   | 0 | 0  |

|    |     |     |     |    |    |     |
|----|-----|-----|-----|----|----|-----|
| 0  | 0   | 0   | 1   | 0  | 0  | 0   |
| 0  | 0   | 0   | 0   | 0  | 0  | 0   |
| 0  | 0   | 0   | 0   | 1  | 0  | 0   |
| 0  | 0   | 12  | 0   | 0  | 0  | 0   |
| 0  | 0   | 0   | 0   | 0  | 0  | 0   |
| 0  | 0   | 0   | 0   | 0  | 0  | 0   |
| 0  | 0   | 0   | 0   | 0  | 0  | 0   |
| 1  | 0   | 0   | 0   | 0  | 0  | 0   |
| 0  | 0   | 0   | 0   | 0  | 0  | 0   |
| 0  | 0   | 0   | 0   | 0  | 0  | 0   |
| 0  | 0   | 0   | 0   | 0  | 0  | 0   |
| 1  | 0   | 0   | 0   | 0  | 0  | 0   |
| 0  | 0   | 0   | 0   | 0  | 0  | 0   |
| 0  | 0   | 2   | 0   | 0  | 0  | 0   |
| 0  | 0   | 0   | 0   | 0  | 0  | 0   |
| 0  | 0   | 0   | 0   | 0  | 0  | 0   |
| 0  | 0   | 0   | 0   | 0  | 0  | 0   |
| 0  | 0   | 0   | 0   | 0  | 0  | 0   |
| 0  | 0   | 0   | 0   | 0  | 0  | 0   |
| 0  | 1   | 118 | 0   | 28 | 3  | 0   |
| 0  | 0   | 0   | 0   | 0  | 0  | 0   |
| 6  | 0   | 1   | 0   | 0  | 71 | 1   |
| 0  | 0   | 0   | 0   | 0  | 0  | 0   |
| 29 | 341 | 254 | 121 | 13 | 18 | 189 |
| 0  | 0   | 0   | 0   | 1  | 7  | 0   |
| 0  | 0   | 0   | 0   | 1  | 0  | 0   |
| 0  | 3   | 1   | 0   | 0  | 4  | 3   |
| 0  | 0   | 0   | 0   | 0  | 1  | 0   |
| 0  | 0   | 0   | 0   | 0  | 0  | 0   |
| 0  | 0   | 0   | 0   | 0  | 0  | 0   |
| 0  | 0   | 0   | 0   | 0  | 0  | 0   |
| 0  | 0   | 0   | 0   | 0  | 0  | 0   |
| 0  | 1   | 0   | 3   | 0  | 1  | 6   |
| 0  | 0   | 0   | 2   | 0  | 0  | 1   |
| 0  | 0   | 0   | 0   | 0  | 0  | 3   |
| 0  | 0   | 0   | 0   | 0  | 0  | 0   |
| 0  | 0   | 0   | 0   | 0  | 0  | 0   |
| 0  | 0   | 0   | 0   | 0  | 0  | 0   |
| 0  | 0   | 0   | 0   | 0  | 1  | 0   |
| 0  | 16  | 0   | 2   | 1  | 1  | 6   |
| 0  | 0   | 0   | 0   | 0  | 0  | 0   |
| 0  | 0   | 0   | 0   | 0  | 0  | 0   |
| 0  | 3   | 0   | 1   | 0  | 0  | 4   |
| 0  | 0   | 0   | 0   | 0  | 0  | 0   |
| 0  | 0   | 0   | 0   | 0  | 0  | 0   |
| 0  | 0   | 0   | 0   | 0  | 0  | 0   |
| 0  | 0   | 0   | 7   | 0  | 0  | 1   |
| 0  | 0   | 0   | 0   | 0  | 0  | 0   |

|      |      |      |      |     |      |      |
|------|------|------|------|-----|------|------|
| 0    | 0    | 0    | 2    | 0   | 0    | 0    |
| 0    | 0    | 0    | 0    | 0   | 0    | 4    |
| 0    | 0    | 117  | 0    | 0   | 0    | 0    |
| 47   | 323  | 91   | 2    | 4   | 0    | 0    |
| 0    | 0    | 0    | 0    | 0   | 0    | 0    |
| 0    | 0    | 0    | 0    | 0   | 0    | 0    |
| 699  | 536  | 3815 | 15   | 552 | 1    | 4    |
| 0    | 0    | 0    | 0    | 0   | 0    | 0    |
| 0    | 0    | 1    | 0    | 0   | 0    | 0    |
| 0    | 0    | 0    | 0    | 0   | 0    | 0    |
| 0    | 0    | 0    | 0    | 0   | 0    | 0    |
| 2097 | 4097 | 6243 | 1964 | 573 | 6008 | 3566 |
| 0    | 124  | 11   | 138  | 0   | 19   | 52   |
| 50   | 5    | 388  | 24   | 17  | 3    | 330  |
| 0    | 18   | 3    | 0    | 1   | 5    | 17   |
| 1    | 619  | 8    | 91   | 9   | 17   | 122  |
| 30   | 601  | 273  | 55   | 42  | 4    | 271  |
| 1    | 162  | 3    | 41   | 16  | 2    | 75   |
| 0    | 0    | 1    | 0    | 1   | 714  | 2    |
| 0    | 1    | 9    | 66   | 0   | 0    | 0    |
| 0    | 0    | 0    | 0    | 0   | 1    | 4    |
| 0    | 10   | 0    | 2    | 0   | 19   | 0    |
| 0    | 800  | 3    | 29   | 0   | 0    | 0    |
| 0    | 0    | 0    | 0    | 0   | 0    | 0    |
| 0    | 0    | 0    | 5    | 0   | 1    | 0    |
| 0    | 0    | 0    | 0    | 0   | 5    | 0    |
| 0    | 0    | 0    | 0    | 0   | 0    | 0    |
| 0    | 0    | 0    | 2    | 0   | 0    | 12   |
| 0    | 0    | 0    | 0    | 6   | 0    | 71   |
| 0    | 73   | 4    | 44   | 0   | 0    | 3    |
| 0    | 385  | 0    | 4    | 0   | 3    | 9    |
| 0    | 17   | 0    | 8    | 1   | 0    | 19   |
| 0    | 0    | 0    | 0    | 0   | 0    | 0    |
| 0    | 22   | 0    | 0    | 0   | 0    | 6    |
| 0    | 0    | 0    | 0    | 0   | 0    | 0    |
| 4    | 0    | 0    | 0    | 0   | 0    | 0    |
| 156  | 133  | 458  | 30   | 35  | 193  | 72   |
| 0    | 0    | 0    | 0    | 0   | 0    | 0    |
| 0    | 0    | 0    | 1    | 0   | 40   | 0    |
| 0    | 15   | 2    | 22   | 0   | 0    | 3    |
| 0    | 0    | 0    | 0    | 0   | 0    | 0    |
| 0    | 0    | 0    | 0    | 0   | 0    | 0    |
| 0    | 0    | 0    | 4    | 0   | 0    | 5    |
| 0    | 0    | 0    | 0    | 0   | 0    | 0    |
| 0    | 0    | 0    | 0    | 0   | 1    | 0    |
| 0    | 0    | 0    | 0    | 0   | 0    | 0    |
| 0    | 0    | 0    | 0    | 0   | 0    | 3    |
| 0    | 0    | 0    | 0    | 0   | 1    | 0    |

|    |   |    |   |   |    |    |
|----|---|----|---|---|----|----|
| 0  | 0 | 1  | 0 | 0 | 99 | 0  |
| 2  | 6 | 15 | 0 | 0 | 5  | 0  |
| 0  | 0 | 0  | 0 | 0 | 0  | 0  |
| 19 | 0 | 12 | 0 | 0 | 0  | 0  |
| 0  | 0 | 0  | 0 | 0 | 0  | 0  |
| 0  | 0 | 0  | 0 | 0 | 0  | 0  |
| 0  | 0 | 0  | 0 | 0 | 0  | 1  |
| 0  | 0 | 1  | 0 | 0 | 0  | 0  |
| 0  | 0 | 0  | 0 | 0 | 0  | 0  |
| 0  | 0 | 0  | 0 | 0 | 0  | 0  |
| 0  | 0 | 0  | 0 | 0 | 0  | 0  |
| 0  | 0 | 0  | 1 | 0 | 0  | 0  |
| 1  | 0 | 0  | 4 | 0 | 1  | 0  |
| 0  | 0 | 0  | 0 | 1 | 1  | 11 |
| 0  | 7 | 0  | 0 | 0 | 0  | 0  |
| 0  | 0 | 0  | 0 | 0 | 0  | 0  |
| 0  | 0 | 0  | 0 | 0 | 0  | 0  |
| 0  | 0 | 0  | 4 | 0 | 0  | 0  |
| 0  | 1 | 0  | 0 | 0 | 44 | 0  |
| 0  | 0 | 1  | 0 | 0 | 0  | 0  |
| 0  | 0 | 0  | 0 | 0 | 0  | 0  |
| 0  | 2 | 5  | 4 | 0 | 10 | 8  |
| 0  | 0 | 0  | 0 | 0 | 0  | 0  |
| 0  | 0 | 0  | 0 | 0 | 0  | 0  |
| 0  | 0 | 1  | 0 | 0 | 0  | 0  |
| 0  | 3 | 0  | 0 | 0 | 0  | 0  |
| 0  | 0 | 0  | 0 | 0 | 0  | 0  |
| 1  | 0 | 5  | 0 | 0 | 2  | 0  |
| 0  | 0 | 0  | 2 | 0 | 0  | 0  |
| 0  | 3 | 0  | 0 | 0 | 0  | 1  |
| 0  | 0 | 0  | 0 | 0 | 2  | 0  |
| 4  | 3 | 13 | 4 | 0 | 4  | 2  |
| 3  | 5 | 23 | 1 | 1 | 1  | 9  |
| 9  | 8 | 22 | 3 | 1 | 5  | 2  |
| 0  | 0 | 0  | 0 | 0 | 0  | 0  |
| 0  | 0 | 0  | 0 | 1 | 0  | 1  |
| 0  | 1 | 10 | 0 | 1 | 0  | 13 |
| 0  | 0 | 0  | 0 | 0 | 0  | 0  |
| 0  | 0 | 0  | 0 | 0 | 0  | 1  |
| 0  | 0 | 0  | 0 | 0 | 1  | 1  |
| 0  | 1 | 0  | 0 | 0 | 0  | 0  |
| 0  | 5 | 0  | 1 | 0 | 0  | 2  |
| 0  | 0 | 0  | 0 | 0 | 0  | 0  |
| 0  | 0 | 0  | 1 | 0 | 0  | 2  |
| 0  | 0 | 0  | 0 | 0 | 0  | 0  |
| 0  | 0 | 0  | 0 | 0 | 0  | 0  |
| 0  | 0 | 0  | 0 | 0 | 0  | 0  |
| 0  | 0 | 0  | 0 | 0 | 0  | 0  |
| 0  | 0 | 0  | 0 | 0 | 0  | 0  |

|    |   |    |    |   |    |    |
|----|---|----|----|---|----|----|
| 0  | 0 | 1  | 0  | 0 | 1  | 1  |
| 2  | 1 | 5  | 0  | 0 | 0  | 0  |
| 0  | 0 | 0  | 0  | 0 | 0  | 0  |
| 0  | 0 | 0  | 0  | 0 | 1  | 0  |
| 0  | 1 | 0  | 0  | 0 | 0  | 0  |
| 0  | 1 | 1  | 0  | 0 | 0  | 0  |
| 0  | 0 | 0  | 0  | 0 | 0  | 0  |
| 2  | 3 | 8  | 0  | 0 | 1  | 0  |
| 0  | 0 | 0  | 0  | 0 | 0  | 0  |
| 6  | 5 | 15 | 0  | 3 | 8  | 4  |
| 0  | 0 | 0  | 0  | 0 | 0  | 0  |
| 0  | 0 | 0  | 0  | 0 | 0  | 0  |
| 0  | 0 | 0  | 0  | 0 | 0  | 0  |
| 0  | 0 | 4  | 0  | 0 | 0  | 0  |
| 0  | 0 | 0  | 0  | 0 | 0  | 0  |
| 0  | 0 | 0  | 0  | 0 | 0  | 0  |
| 0  | 0 | 0  | 0  | 0 | 0  | 0  |
| 0  | 0 | 0  | 0  | 0 | 0  | 1  |
| 0  | 0 | 0  | 0  | 0 | 0  | 0  |
| 0  | 0 | 1  | 0  | 0 | 3  | 0  |
| 0  | 0 | 0  | 0  | 1 | 0  | 0  |
| 0  | 0 | 0  | 0  | 0 | 0  | 0  |
| 0  | 0 | 0  | 0  | 0 | 0  | 0  |
| 0  | 0 | 0  | 0  | 0 | 2  | 0  |
| 0  | 0 | 0  | 0  | 0 | 0  | 0  |
| 1  | 0 | 0  | 0  | 0 | 0  | 1  |
| 0  | 0 | 1  | 0  | 0 | 0  | 0  |
| 0  | 0 | 0  | 0  | 0 | 0  | 0  |
| 3  | 0 | 0  | 0  | 0 | 0  | 0  |
| 0  | 0 | 0  | 0  | 0 | 0  | 0  |
| 0  | 0 | 0  | 0  | 0 | 0  | 0  |
| 0  | 0 | 2  | 6  | 0 | 0  | 0  |
| 0  | 0 | 10 | 70 | 0 | 0  | 22 |
| 0  | 0 | 0  | 0  | 0 | 0  | 0  |
| 0  | 0 | 0  | 0  | 0 | 0  | 0  |
| 0  | 0 | 0  | 0  | 0 | 0  | 0  |
| 0  | 0 | 0  | 7  | 1 | 3  | 2  |
| 0  | 0 | 1  | 14 | 0 | 1  | 7  |
| 0  | 0 | 0  | 0  | 1 | 0  | 12 |
| 0  | 3 | 0  | 12 | 0 | 4  | 5  |
| 0  | 0 | 0  | 0  | 0 | 35 | 0  |
| 0  | 0 | 0  | 0  | 0 | 0  | 0  |
| 0  | 0 | 0  | 0  | 0 | 0  | 0  |
| 0  | 0 | 1  | 20 | 0 | 0  | 18 |
| 0  | 0 | 0  | 0  | 0 | 0  | 0  |
| 0  | 0 | 0  | 0  | 0 | 0  | 0  |
| 0  | 0 | 0  | 0  | 0 | 1  | 0  |
| 0  | 0 | 0  | 0  | 0 | 0  | 0  |
| 18 | 0 | 3  | 0  | 4 | 10 | 0  |

|     |     |     |    |    |    |    |
|-----|-----|-----|----|----|----|----|
| 0   | 52  | 0   | 18 | 2  | 0  | 9  |
| 0   | 0   | 0   | 3  | 1  | 2  | 6  |
| 0   | 0   | 0   | 0  | 0  | 2  | 0  |
| 9   | 31  | 1   | 2  | 1  | 0  | 3  |
| 0   | 0   | 0   | 0  | 0  | 0  | 0  |
| 0   | 0   | 0   | 0  | 0  | 0  | 0  |
| 112 | 7   | 733 | 3  | 0  | 82 | 0  |
| 0   | 2   | 2   | 12 | 1  | 0  | 3  |
| 1   | 173 | 92  | 11 | 1  | 22 | 33 |
| 0   | 5   | 0   | 26 | 1  | 2  | 2  |
| 0   | 0   | 0   | 4  | 0  | 0  | 2  |
| 0   | 4   | 0   | 4  | 2  | 0  | 26 |
| 0   | 0   | 0   | 0  | 0  | 0  | 0  |
| 0   | 0   | 0   | 0  | 0  | 0  | 0  |
| 0   | 0   | 0   | 0  | 0  | 0  | 0  |
| 0   | 0   | 0   | 0  | 0  | 2  | 0  |
| 0   | 0   | 0   | 0  | 0  | 0  | 0  |
| 0   | 0   | 0   | 0  | 0  | 0  | 0  |
| 0   | 3   | 31  | 34 | 1  | 5  | 13 |
| 0   | 9   | 0   | 5  | 2  | 0  | 29 |
| 0   | 0   | 0   | 0  | 0  | 0  | 0  |
| 0   | 0   | 1   | 2  | 0  | 0  | 0  |
| 0   | 2   | 0   | 5  | 1  | 0  | 9  |
| 0   | 0   | 0   | 0  | 0  | 0  | 0  |
| 0   | 0   | 0   | 0  | 0  | 0  | 0  |
| 0   | 0   | 0   | 0  | 0  | 0  | 0  |
| 4   | 79  | 1   | 8  | 0  | 0  | 9  |
| 0   | 0   | 0   | 0  | 0  | 13 | 0  |
| 0   | 0   | 0   | 0  | 0  | 0  | 0  |
| 0   | 0   | 1   | 0  | 0  | 0  | 1  |
| 0   | 0   | 0   | 0  | 0  | 0  | 0  |
| 0   | 0   | 0   | 0  | 0  | 0  | 0  |
| 204 | 183 | 6   | 0  | 2  | 0  | 0  |
| 0   | 0   | 0   | 0  | 0  | 0  | 0  |
| 0   | 0   | 0   | 0  | 0  | 2  | 0  |
| 0   | 0   | 0   | 0  | 0  | 0  | 0  |
| 0   | 0   | 132 | 0  | 0  | 0  | 0  |
| 0   | 0   | 0   | 0  | 16 | 0  | 0  |
| 0   | 0   | 0   | 0  | 0  | 0  | 0  |
| 0   | 0   | 0   | 0  | 0  | 0  | 0  |
| 0   | 0   | 0   | 0  | 0  | 3  | 0  |
| 0   | 0   | 0   | 0  | 0  | 0  | 0  |
| 0   | 88  | 6   | 27 | 0  | 0  | 8  |
| 0   | 49  | 0   | 0  | 0  | 0  | 2  |
| 0   | 0   | 0   | 0  | 0  | 0  | 0  |
| 0   | 0   | 0   | 0  | 0  | 0  | 0  |
| 0   | 0   | 0   | 0  | 0  | 0  | 10 |
| 0   | 0   | 0   | 0  | 0  | 0  | 0  |

|     |     |      |     |     |         |      |
|-----|-----|------|-----|-----|---------|------|
| 6   | 24  | 4    | 1   | 8   | 0       | 0    |
| 0   | 0   | 0    | 0   | 0   | 0       | 0    |
| 0   | 4   | 188  | 8   | 104 | 1190668 | 2914 |
| 0   | 0   | 0    | 9   | 0   | 0       | 0    |
| 0   | 0   | 0    | 0   | 0   | 43      | 0    |
| 0   | 0   | 0    | 0   | 0   | 1       | 0    |
| 0   | 0   | 0    | 0   | 0   | 0       | 0    |
| 0   | 0   | 0    | 0   | 0   | 0       | 0    |
| 0   | 0   | 0    | 0   | 0   | 2       | 1    |
| 4   | 3   | 8    | 0   | 0   | 0       | 0    |
| 0   | 0   | 0    | 0   | 0   | 0       | 0    |
| 24  | 2   | 0    | 0   | 0   | 0       | 0    |
| 0   | 0   | 0    | 0   | 0   | 0       | 0    |
| 0   | 0   | 0    | 0   | 0   | 0       | 1    |
| 0   | 0   | 0    | 0   | 0   | 0       | 0    |
| 0   | 0   | 0    | 0   | 0   | 0       | 0    |
| 0   | 0   | 0    | 0   | 0   | 0       | 0    |
| 0   | 0   | 0    | 0   | 0   | 0       | 0    |
| 0   | 0   | 0    | 0   | 2   | 0       | 9    |
| 9   | 4   | 0    | 0   | 0   | 1       | 0    |
| 0   | 0   | 0    | 0   | 0   | 0       | 0    |
| 0   | 5   | 0    | 0   | 0   | 0       | 0    |
| 0   | 0   | 0    | 0   | 0   | 0       | 0    |
| 0   | 5   | 1    | 18  | 1   | 0       | 17   |
| 1   | 22  | 2    | 23  | 0   | 0       | 2    |
| 0   | 1   | 0    | 0   | 0   | 0       | 0    |
| 0   | 0   | 0    | 0   | 0   | 0       | 0    |
| 0   | 0   | 0    | 0   | 0   | 0       | 0    |
| 0   | 15  | 0    | 0   | 0   | 0       | 0    |
| 2   | 0   | 1    | 0   | 0   | 0       | 1    |
| 0   | 0   | 0    | 0   | 0   | 0       | 0    |
| 0   | 21  | 3    | 8   | 0   | 0       | 0    |
| 0   | 0   | 0    | 0   | 0   | 30      | 0    |
| 0   | 0   | 0    | 0   | 0   | 0       | 0    |
| 0   | 0   | 0    | 0   | 0   | 0       | 0    |
| 2   | 0   | 2    | 0   | 0   | 0       | 1    |
| 0   | 0   | 0    | 0   | 0   | 0       | 0    |
| 0   | 0   | 0    | 0   | 0   | 0       | 0    |
| 0   | 0   | 0    | 0   | 0   | 0       | 0    |
| 184 | 160 | 121  | 17  | 30  | 3       | 65   |
| 0   | 0   | 0    | 0   | 0   | 0       | 0    |
| 0   | 4   | 0    | 0   | 0   | 0       | 7    |
| 991 | 864 | 4048 | 324 | 902 | 875     | 2537 |
| 0   | 1   | 8    | 3   | 0   | 331     | 24   |
| 548 | 49  | 644  | 8   | 78  | 65      | 66   |
| 20  | 9   | 390  | 16  | 84  | 353     | 66   |
| 2   | 43  | 15   | 7   | 6   | 148     | 101  |

|     |    |     |    |   |    |    |
|-----|----|-----|----|---|----|----|
| 1   | 1  | 16  | 0  | 0 | 1  | 0  |
| 6   | 92 | 11  | 74 | 5 | 15 | 9  |
| 4   | 24 | 17  | 9  | 0 | 0  | 11 |
| 9   | 0  | 0   | 1  | 0 | 1  | 0  |
| 0   | 1  | 0   | 1  | 0 | 0  | 6  |
| 0   | 0  | 0   | 0  | 0 | 1  | 0  |
| 128 | 0  | 3   | 2  | 0 | 0  | 3  |
| 0   | 1  | 0   | 1  | 0 | 0  | 24 |
| 2   | 0  | 1   | 2  | 0 | 39 | 2  |
| 4   | 0  | 0   | 0  | 0 | 0  | 0  |
| 0   | 2  | 117 | 3  | 5 | 0  | 33 |
| 0   | 8  | 1   | 1  | 0 | 1  | 0  |
| 0   | 1  | 271 | 0  | 0 | 0  | 0  |
| 0   | 2  | 1   | 0  | 0 | 0  | 0  |
| 0   | 0  | 0   | 0  | 0 | 0  | 2  |
| 9   | 15 | 13  | 0  | 0 | 0  | 5  |
| 0   | 9  | 0   | 4  | 2 | 0  | 20 |
| 0   | 20 | 3   | 4  | 6 | 1  | 86 |
| 0   | 0  | 0   | 0  | 0 | 0  | 0  |
| 5   | 21 | 4   | 15 | 0 | 0  | 6  |
| 58  | 0  | 0   | 1  | 0 | 0  | 3  |
| 6   | 0  | 1   | 0  | 1 | 0  | 1  |
| 0   | 0  | 0   | 0  | 0 | 0  | 0  |
| 0   | 5  | 0   | 0  | 0 | 0  | 0  |
| 0   | 0  | 0   | 9  | 0 | 0  | 1  |
| 2   | 1  | 4   | 0  | 0 | 0  | 0  |
| 0   | 0  | 0   | 0  | 2 | 3  | 0  |
| 0   | 0  | 0   | 0  | 0 | 0  | 1  |
| 0   | 0  | 0   | 4  | 0 | 0  | 0  |
| 0   | 0  | 0   | 0  | 0 | 0  | 4  |
| 0   | 0  | 0   | 0  | 0 | 0  | 0  |
| 0   | 0  | 0   | 0  | 0 | 0  | 0  |
| 0   | 0  | 0   | 0  | 0 | 0  | 0  |
| 0   | 0  | 0   | 0  | 0 | 0  | 0  |
| 0   | 0  | 2   | 1  | 0 | 0  | 1  |
| 0   | 0  | 0   | 0  | 0 | 0  | 1  |
| 0   | 0  | 0   | 0  | 0 | 0  | 0  |
| 0   | 4  | 0   | 0  | 0 | 0  | 1  |
| 4   | 0  | 0   | 0  | 0 | 0  | 0  |
| 0   | 0  | 0   | 0  | 0 | 0  | 0  |
| 0   | 0  | 0   | 0  | 0 | 0  | 0  |
| 0   | 0  | 0   | 0  | 0 | 0  | 0  |
| 0   | 0  | 0   | 0  | 0 | 0  | 0  |
| 0   | 0  | 0   | 0  | 0 | 0  | 0  |
| 0   | 1  | 1   | 0  | 0 | 1  | 1  |
| 0   | 0  | 0   | 0  | 0 | 3  | 0  |
| 0   | 0  | 0   | 0  | 0 | 0  | 0  |
| 0   | 0  | 0   | 0  | 0 | 0  | 0  |
| 0   | 0  | 0   | 1  | 0 | 0  | 0  |
| 1   | 1  | 0   | 0  | 0 | 0  | 0  |
| 0   | 0  | 0   | 0  | 0 | 0  | 0  |







|     |     |      |    |      |     |     |
|-----|-----|------|----|------|-----|-----|
| 0   | 0   | 0    | 0  | 0    | 0   | 0   |
| 103 | 24  | 292  | 64 | 23   | 63  | 239 |
| 20  | 11  | 2    | 4  | 2    | 32  | 52  |
| 0   | 11  | 2    | 2  | 1    | 1   | 10  |
| 81  | 18  | 21   | 22 | 24   | 11  | 0   |
| 0   | 0   | 0    | 0  | 0    | 0   | 0   |
| 2   | 8   | 89   | 3  | 1    | 29  | 3   |
| 69  | 2   | 39   | 4  | 1    | 59  | 0   |
| 0   | 0   | 0    | 0  | 0    | 27  | 0   |
| 0   | 1   | 1    | 8  | 4    | 0   | 76  |
| 0   | 0   | 1    | 24 | 0    | 0   | 3   |
| 0   | 0   | 1    | 8  | 2    | 0   | 60  |
| 3   | 0   | 9    | 3  | 1    | 19  | 0   |
| 0   | 1   | 2    | 6  | 0    | 0   | 3   |
| 4   | 6   | 2    | 1  | 2    | 0   | 0   |
| 0   | 0   | 0    | 0  | 0    | 0   | 0   |
| 0   | 0   | 0    | 0  | 0    | 0   | 0   |
| 0   | 5   | 1    | 2  | 0    | 0   | 0   |
| 0   | 0   | 0    | 0  | 1    | 0   | 10  |
| 0   | 1   | 0    | 0  | 0    | 0   | 0   |
| 0   | 1   | 14   | 0  | 0    | 0   | 1   |
| 0   | 0   | 0    | 0  | 0    | 0   | 0   |
| 0   | 0   | 0    | 0  | 0    | 0   | 0   |
| 1   | 0   | 0    | 0  | 0    | 0   | 0   |
| 0   | 0   | 0    | 0  | 0    | 0   | 0   |
| 0   | 0   | 1    | 0  | 0    | 0   | 0   |
| 0   | 0   | 0    | 0  | 0    | 0   | 0   |
| 0   | 0   | 0    | 0  | 0    | 0   | 0   |
| 0   | 0   | 0    | 0  | 0    | 0   | 0   |
| 0   | 0   | 0    | 0  | 0    | 0   | 0   |
| 0   | 0   | 0    | 0  | 0    | 0   | 0   |
| 0   | 0   | 0    | 0  | 0    | 0   | 0   |
| 0   | 0   | 0    | 0  | 0    | 0   | 0   |
| 0   | 0   | 142  | 4  | 1    | 0   | 46  |
| 23  | 68  | 94   | 64 | 30   | 14  | 63  |
| 505 | 6   | 1237 | 0  | 1540 | 113 | 2   |
| 0   | 22  | 0    | 0  | 0    | 1   | 7   |
| 0   | 0   | 0    | 3  | 0    | 1   | 0   |
| 1   | 3   | 45   | 0  | 4    | 0   | 0   |
| 0   | 7   | 10   | 1  | 8    | 3   | 14  |
| 24  | 35  | 12   | 17 | 6    | 1   | 32  |
| 1   | 0   | 126  | 2  | 1    | 0   | 2   |
| 39  | 23  | 84   | 33 | 21   | 98  | 42  |
| 0   | 0   | 0    | 0  | 0    | 0   | 0   |
| 0   | 0   | 0    | 7  | 0    | 3   | 15  |
| 6   | 3   | 4    | 0  | 0    | 0   | 0   |
| 51  | 105 | 2    | 0  | 0    | 1   | 9   |
| 0   | 0   | 1    | 4  | 0    | 0   | 3   |
| 0   | 0   | 0    | 0  | 0    | 0   | 0   |



|    |      |     |    |     |     |     |
|----|------|-----|----|-----|-----|-----|
| 79 | 8588 | 669 | 20 | 891 | 120 | 399 |
| 52 | 25   | 5   | 14 | 5   | 71  | 39  |
| 0  | 0    | 0   | 0  | 0   | 0   | 0   |
| 0  | 0    | 0   | 0  | 5   | 0   | 0   |
| 0  | 1    | 0   | 3  | 0   | 0   | 0   |
| 0  | 0    | 0   | 0  | 0   | 0   | 0   |
| 0  | 0    | 0   | 0  | 0   | 0   | 0   |
| 0  | 2    | 0   | 0  | 0   | 0   | 0   |
| 0  | 0    | 0   | 0  | 1   | 0   | 0   |
| 0  | 0    | 0   | 0  | 0   | 0   | 0   |
| 0  | 0    | 0   | 0  | 0   | 0   | 0   |
| 0  | 0    | 0   | 0  | 0   | 0   | 0   |
| 0  | 353  | 11  | 0  | 13  | 2   | 9   |
| 0  | 0    | 0   | 0  | 0   | 0   | 0   |
| 0  | 0    | 2   | 0  | 0   | 2   | 0   |
| 0  | 0    | 0   | 0  | 0   | 0   | 0   |
| 0  | 0    | 0   | 0  | 0   | 0   | 0   |
| 0  | 0    | 0   | 0  | 0   | 0   | 0   |
| 0  | 0    | 0   | 0  | 0   | 0   | 0   |
| 0  | 0    | 0   | 0  | 0   | 0   | 0   |
| 0  | 0    | 146 | 0  | 31  | 29  | 0   |
| 0  | 0    | 0   | 0  | 0   | 0   | 0   |
| 0  | 0    | 0   | 0  | 0   | 0   | 0   |
| 0  | 0    | 4   | 0  | 0   | 0   | 0   |
| 0  | 0    | 0   | 0  | 0   | 0   | 0   |
| 37 | 57   | 134 | 1  | 16  | 3   | 58  |
| 0  | 0    | 0   | 0  | 0   | 0   | 0   |
| 0  | 0    | 0   | 0  | 0   | 0   | 0   |
| 13 | 107  | 0   | 0  | 5   | 0   | 0   |
| 1  | 0    | 0   | 1  | 1   | 0   | 10  |
| 8  | 22   | 16  | 16 | 5   | 70  | 113 |
| 8  | 1    | 2   | 2  | 9   | 3   | 3   |
| 1  | 0    | 0   | 0  | 0   | 0   | 0   |
| 14 | 0    | 3   | 2  | 3   | 81  | 33  |
| 0  | 0    | 0   | 0  | 1   | 0   | 0   |
| 0  | 9    | 6   | 1  | 12  | 5   | 4   |
| 0  | 0    | 0   | 0  | 0   | 1   | 4   |
| 3  | 1    | 0   | 0  | 1   | 0   | 0   |
| 0  | 0    | 0   | 1  | 1   | 0   | 12  |
| 0  | 0    | 0   | 0  | 0   | 0   | 0   |
| 0  | 0    | 0   | 0  | 0   | 0   | 0   |
| 0  | 0    | 0   | 0  | 0   | 0   | 0   |
| 0  | 0    | 0   | 0  | 0   | 0   | 0   |
| 0  | 0    | 0   | 0  | 0   | 0   | 0   |
| 0  | 0    | 0   | 0  | 0   | 0   | 0   |
| 0  | 0    | 0   | 0  | 0   | 0   | 0   |
| 0  | 8    | 418 | 0  | 2   | 0   | 0   |
| 29 | 39   | 0   | 9  | 5   | 3   | 8   |
| 0  | 0    | 0   | 0  | 0   | 0   | 17  |
| 0  | 0    | 0   | 0  | 0   | 1   | 0   |
| 0  | 0    | 0   | 0  | 0   | 0   | 0   |

|      |      |      |    |      |    |     |
|------|------|------|----|------|----|-----|
| 0    | 0    | 0    | 0  | 0    | 0  | 0   |
| 0    | 0    | 0    | 0  | 0    | 0  | 0   |
| 0    | 1    | 1    | 0  | 0    | 0  | 0   |
| 0    | 1    | 0    | 0  | 0    | 0  | 0   |
| 0    | 0    | 0    | 0  | 0    | 0  | 0   |
| 0    | 0    | 0    | 0  | 0    | 0  | 0   |
| 0    | 0    | 0    | 0  | 0    | 0  | 0   |
| 0    | 5    | 0    | 0  | 0    | 0  | 0   |
| 0    | 1    | 0    | 0  | 0    | 0  | 0   |
| 0    | 0    | 0    | 0  | 5    | 2  | 0   |
| 0    | 0    | 0    | 0  | 0    | 0  | 0   |
| 0    | 0    | 0    | 0  | 5    | 0  | 0   |
| 0    | 0    | 0    | 0  | 0    | 0  | 0   |
| 0    | 0    | 0    | 0  | 0    | 0  | 0   |
| 0    | 0    | 0    | 0  | 0    | 0  | 0   |
| 115  | 192  | 151  | 9  | 4043 | 47 | 25  |
| 0    | 2    | 20   | 2  | 45   | 0  | 89  |
| 7    | 4    | 0    | 1  | 10   | 0  | 0   |
| 0    | 0    | 0    | 0  | 0    | 0  | 0   |
| 0    | 0    | 0    | 0  | 0    | 0  | 0   |
| 1    | 0    | 0    | 0  | 5    | 0  | 0   |
| 0    | 0    | 0    | 0  | 1    | 0  | 0   |
| 0    | 0    | 0    | 0  | 0    | 0  | 0   |
| 0    | 0    | 0    | 0  | 0    | 0  | 0   |
| 0    | 1    | 7    | 0  | 16   | 0  | 0   |
| 1    | 9    | 0    | 0  | 1    | 1  | 0   |
| 0    | 0    | 0    | 0  | 2    | 0  | 0   |
| 0    | 0    | 0    | 0  | 0    | 0  | 0   |
| 431  | 210  | 33   | 1  | 83   | 13 | 0   |
| 0    | 12   | 161  | 9  | 16   | 41 | 45  |
| 407  | 291  | 84   | 0  | 24   | 0  | 0   |
| 0    | 5    | 0    | 1  | 8    | 0  | 39  |
| 90   | 32   | 100  | 25 | 9    | 60 | 45  |
| 0    | 0    | 0    | 0  | 0    | 0  | 0   |
| 0    | 0    | 0    | 0  | 0    | 0  | 0   |
| 0    | 0    | 0    | 0  | 0    | 0  | 0   |
| 0    | 0    | 0    | 0  | 0    | 0  | 0   |
| 0    | 0    | 1    | 0  | 0    | 0  | 0   |
| 1477 | 1254 | 1335 | 10 | 421  | 81 | 493 |
| 407  | 1225 | 307  | 0  | 80   | 0  | 118 |
| 0    | 0    | 1    | 1  | 6    | 0  | 38  |
| 0    | 0    | 0    | 0  | 0    | 1  | 1   |
| 12   | 16   | 160  | 0  | 21   | 0  | 15  |
| 0    | 0    | 0    | 0  | 0    | 0  | 0   |
| 0    | 0    | 0    | 0  | 0    | 0  | 0   |
| 1    | 1    | 1    | 0  | 0    | 0  | 1   |
| 0    | 0    | 0    | 0  | 0    | 0  | 0   |
| 0    | 0    | 0    | 0  | 0    | 0  | 0   |



|      |       |     |     |     |     |     |
|------|-------|-----|-----|-----|-----|-----|
| 0    | 0     | 0   | 0   | 0   | 0   | 0   |
| 0    | 0     | 0   | 0   | 0   | 0   | 0   |
| 2346 | 13296 | 446 | 146 | 936 | 200 | 671 |
| 3    | 19    | 67  | 0   | 6   | 9   | 12  |
| 1    | 132   | 337 | 279 | 50  | 54  | 512 |
| 0    | 0     | 3   | 0   | 0   | 2   | 0   |
| 86   | 298   | 9   | 59  | 13  | 34  | 313 |
| 0    | 105   | 153 | 82  | 12  | 19  | 281 |
| 0    | 41    | 7   | 6   | 1   | 0   | 58  |
| 105  | 61    | 129 | 29  | 35  | 37  | 8   |
| 0    | 0     | 0   | 0   | 0   | 17  | 0   |
| 0    | 3     | 0   | 0   | 0   | 0   | 19  |
| 1    | 4     | 26  | 39  | 5   | 1   | 53  |
| 0    | 0     | 0   | 0   | 0   | 8   | 0   |
| 11   | 1210  | 74  | 19  | 6   | 132 | 210 |
| 0    | 9     | 3   | 11  | 4   | 6   | 33  |
| 0    | 0     | 49  | 1   | 0   | 1   | 0   |
| 0    | 0     | 0   | 12  | 0   | 0   | 4   |
| 1    | 18    | 10  | 28  | 4   | 0   | 103 |
| 0    | 85    | 0   | 3   | 1   | 0   | 12  |
| 15   | 147   | 1   | 4   | 0   | 0   | 11  |
| 1    | 12    | 0   | 16  | 0   | 0   | 0   |
| 3    | 0     | 7   | 34  | 0   | 7   | 94  |
| 0    | 0     | 0   | 3   | 2   | 1   | 72  |
| 0    | 1     | 3   | 13  | 0   | 0   | 1   |
| 67   | 35    | 5   | 42  | 1   | 33  | 40  |
| 0    | 0     | 0   | 1   | 0   | 2   | 8   |
| 0    | 0     | 0   | 0   | 0   | 25  | 0   |
| 0    | 4     | 127 | 0   | 0   | 1   | 0   |
| 0    | 0     | 0   | 0   | 0   | 1   | 0   |
| 0    | 0     | 0   | 0   | 0   | 1   | 0   |
| 0    | 0     | 1   | 3   | 0   | 0   | 0   |
| 0    | 0     | 0   | 0   | 0   | 0   | 0   |
| 0    | 4     | 0   | 0   | 0   | 0   | 0   |
| 0    | 1     | 0   | 1   | 0   | 1   | 0   |
| 0    | 0     | 0   | 0   | 0   | 1   | 0   |
| 0    | 1     | 0   | 5   | 0   | 0   | 8   |
| 0    | 0     | 0   | 2   | 0   | 0   | 0   |
| 0    | 0     | 4   | 33  | 0   | 0   | 2   |
| 0    | 0     | 0   | 0   | 0   | 0   | 0   |
| 0    | 0     | 86  | 0   | 0   | 0   | 0   |
| 0    | 0     | 0   | 0   | 0   | 0   | 0   |
| 0    | 1     | 8   | 38  | 0   | 0   | 3   |
| 0    | 0     | 0   | 0   | 0   | 0   | 0   |
| 0    | 0     | 0   | 0   | 0   | 0   | 0   |
| 0    | 0     | 0   | 0   | 0   | 0   | 0   |
| 0    | 0     | 0   | 0   | 0   | 0   | 0   |
| 0    | 0     | 0   | 0   | 0   | 0   | 0   |





|      |      |      |      |      |      |      |
|------|------|------|------|------|------|------|
| 0    | 0    | 0    | 0    | 0    | 0    | 0    |
| 0    | 0    | 0    | 0    | 0    | 0    | 0    |
| 0    | 0    | 0    | 0    | 0    | 0    | 0    |
| 44   | 16   | 5    | 17   | 10   | 2    | 53   |
| 0    | 0    | 3    | 0    | 0    | 0    | 0    |
| 13   | 7    | 1    | 0    | 3    | 0    | 0    |
| 0    | 0    | 0    | 0    | 0    | 0    | 0    |
| 0    | 0    | 0    | 0    | 0    | 0    | 0    |
| 7636 | 485  | 4589 | 284  | 3336 | 350  | 521  |
| 2211 | 2014 | 4414 | 1048 | 1411 | 1132 | 3704 |
| 9    | 99   | 2    | 16   | 0    | 6    | 33   |
| 5    | 11   | 28   | 0    | 0    | 56   | 0    |
| 59   | 124  | 235  | 82   | 40   | 133  | 303  |
| 7    | 45   | 29   | 22   | 35   | 60   | 60   |
| 0    | 1    | 1    | 4    | 1    | 0    | 49   |
| 2    | 5    | 9    | 3    | 0    | 0    | 4    |
| 0    | 0    | 313  | 1    | 3    | 17   | 0    |
| 28   | 6    | 40   | 11   | 16   | 10   | 15   |
| 135  | 354  | 48   | 0    | 6    | 12   | 0    |
| 0    | 69   | 1    | 14   | 5    | 1    | 30   |
| 39   | 3    | 69   | 16   | 2    | 2    | 15   |
| 0    | 5    | 8    | 43   | 9    | 36   | 15   |
| 0    | 0    | 0    | 0    | 1    | 0    | 6    |
| 15   | 2    | 2    | 0    | 0    | 0    | 0    |
| 0    | 0    | 2    | 10   | 1    | 0    | 10   |
| 1    | 1    | 2    | 1    | 2    | 0    | 3    |
| 1    | 0    | 0    | 0    | 0    | 0    | 3    |
| 21   | 11   | 49   | 6    | 11   | 4    | 18   |
| 0    | 0    | 6    | 1    | 0    | 0    | 4    |
| 0    | 0    | 0    | 0    | 0    | 0    | 0    |
| 0    | 3    | 2    | 16   | 0    | 1    | 6    |
| 0    | 0    | 0    | 0    | 0    | 0    | 0    |
| 6    | 3    | 1    | 0    | 0    | 1    | 7    |
| 1    | 1    | 2    | 0    | 0    | 1    | 1    |
| 0    | 0    | 0    | 0    | 0    | 0    | 0    |
| 0    | 0    | 0    | 0    | 0    | 0    | 0    |
| 1    | 3    | 3    | 0    | 1    | 0    | 1    |
| 6    | 1    | 6    | 7    | 5    | 0    | 6    |
| 0    | 0    | 0    | 0    | 0    | 0    | 0    |
| 0    | 0    | 0    | 0    | 0    | 0    | 1    |
| 0    | 0    | 0    | 0    | 0    | 0    | 0    |
| 1    | 0    | 0    | 0    | 3    | 0    | 0    |
| 0    | 0    | 0    | 0    | 0    | 1    | 0    |
| 0    | 0    | 0    | 0    | 0    | 0    | 0    |
| 0    | 0    | 3    | 0    | 0    | 0    | 0    |
| 0    | 0    | 4    | 0    | 1    | 1    | 0    |
| 1    | 0    | 1    | 1    | 1    | 0    | 0    |
| 0    | 0    | 0    | 0    | 0    | 0    | 0    |









|    |   |     |     |    |    |     |
|----|---|-----|-----|----|----|-----|
| 0  | 0 | 3   | 41  | 0  | 1  | 1   |
| 0  | 0 | 0   | 0   | 0  | 0  | 0   |
| 0  | 0 | 0   | 0   | 0  | 0  | 0   |
| 0  | 0 | 18  | 193 | 1  | 0  | 29  |
| 0  | 1 | 0   | 0   | 0  | 0  | 0   |
| 0  | 0 | 0   | 0   | 0  | 0  | 0   |
| 11 | 9 | 3   | 14  | 4  | 1  | 89  |
| 0  | 0 | 1   | 3   | 0  | 0  | 9   |
| 0  | 0 | 0   | 7   | 0  | 0  | 0   |
| 0  | 0 | 0   | 0   | 0  | 0  | 0   |
| 0  | 0 | 0   | 0   | 0  | 0  | 0   |
| 0  | 0 | 0   | 0   | 0  | 0  | 0   |
| 0  | 5 | 1   | 2   | 0  | 1  | 3   |
| 1  | 0 | 0   | 0   | 3  | 0  | 0   |
| 0  | 7 | 162 | 763 | 29 | 10 | 508 |
| 0  | 0 | 0   | 2   | 0  | 0  | 0   |
| 0  | 0 | 0   | 0   | 0  | 0  | 0   |
| 0  | 0 | 0   | 0   | 0  | 0  | 0   |
| 0  | 3 | 1   | 4   | 0  | 0  | 0   |
| 0  | 0 | 0   | 0   | 0  | 0  | 0   |
| 0  | 0 | 0   | 0   | 0  | 0  | 0   |
| 0  | 0 | 0   | 0   | 0  | 0  | 0   |
| 0  | 0 | 0   | 0   | 0  | 0  | 0   |
| 0  | 0 | 0   | 0   | 0  | 0  | 0   |
| 0  | 0 | 0   | 0   | 0  | 0  | 0   |
| 0  | 0 | 1   | 1   | 0  | 1  | 0   |
| 0  | 0 | 0   | 1   | 0  | 0  | 0   |







|   |   |   |    |    |    |    |
|---|---|---|----|----|----|----|
| 0 | 0 | 0 | 0  | 0  | 0  | 0  |
| 0 | 0 | 0 | 0  | 0  | 0  | 0  |
| 0 | 0 | 0 | 0  | 0  | 0  | 0  |
| 0 | 0 | 0 | 0  | 0  | 0  | 0  |
| 0 | 0 | 0 | 0  | 0  | 0  | 0  |
| 0 | 0 | 0 | 18 | 12 | 16 | 3  |
| 0 | 0 | 0 | 0  | 0  | 0  | 0  |
| 0 | 0 | 0 | 0  | 0  | 0  | 0  |
| 0 | 0 | 0 | 0  | 0  | 0  | 0  |
| 0 | 0 | 0 | 0  | 0  | 0  | 0  |
| 0 | 0 | 0 | 0  | 0  | 0  | 0  |
| 0 | 0 | 0 | 0  | 0  | 0  | 0  |
| 0 | 0 | 0 | 0  | 0  | 0  | 0  |
| 0 | 0 | 0 | 0  | 0  | 0  | 0  |
| 0 | 0 | 0 | 0  | 0  | 0  | 0  |
| 0 | 0 | 0 | 0  | 0  | 0  | 0  |
| 0 | 0 | 0 | 0  | 0  | 0  | 0  |
| 0 | 0 | 1 | 0  | 0  | 0  | 0  |
| 0 | 3 | 0 | 0  | 0  | 0  | 1  |
| 0 | 0 | 1 | 0  | 0  | 0  | 0  |
| 0 | 0 | 0 | 0  | 0  | 0  | 0  |
| 9 | 0 | 2 | 21 | 21 | 10 | 0  |
| 0 | 0 | 0 | 0  | 0  | 0  | 0  |
| 0 | 0 | 0 | 0  | 0  | 0  | 0  |
| 0 | 4 | 0 | 0  | 0  | 0  | 9  |
| 0 | 3 | 0 | 0  | 0  | 0  | 2  |
| 0 | 0 | 0 | 0  | 0  | 0  | 0  |
| 0 | 0 | 0 | 0  | 0  | 0  | 0  |
| 6 | 1 | 0 | 3  | 0  | 0  | 17 |
| 0 | 2 | 0 | 9  | 5  | 1  | 0  |
| 3 | 1 | 0 | 12 | 1  | 5  | 1  |
| 2 | 1 | 2 | 0  | 1  | 2  | 0  |
| 0 | 0 | 0 | 0  | 0  | 0  | 0  |
| 0 | 0 | 0 | 0  | 0  | 0  | 0  |
| 0 | 0 | 0 | 0  | 0  | 0  | 0  |
| 0 | 0 | 0 | 0  | 0  | 0  | 0  |
| 0 | 0 | 0 | 0  | 0  | 0  | 0  |
| 0 | 2 | 0 | 0  | 3  | 0  | 0  |
| 0 | 0 | 0 | 0  | 0  | 0  | 0  |
| 0 | 0 | 0 | 0  | 0  | 0  | 0  |
| 0 | 0 | 0 | 0  | 0  | 0  | 0  |
| 0 | 0 | 0 | 0  | 0  | 0  | 0  |
| 0 | 0 | 0 | 0  | 0  | 0  | 0  |
| 0 | 3 | 0 | 0  | 0  | 0  | 0  |
| 0 | 0 | 0 | 0  | 0  | 0  | 0  |
| 0 | 0 | 0 | 0  | 3  | 0  | 2  |
| 0 | 0 | 0 | 0  | 0  | 0  | 0  |
| 0 | 0 | 0 | 0  | 0  | 0  | 0  |
| 0 | 0 | 0 | 0  | 0  | 0  | 1  |
| 0 | 0 | 0 | 0  | 0  | 0  | 0  |
| 0 | 0 | 0 | 0  | 0  | 0  | 1  |
| 0 | 3 | 0 | 1  | 0  | 0  | 0  |



|    |    |    |      |     |   |     |
|----|----|----|------|-----|---|-----|
| 0  | 0  | 2  | 0    | 0   | 0 | 0   |
| 0  | 0  | 0  | 0    | 0   | 1 | 2   |
| 0  | 0  | 0  | 0    | 0   | 0 | 0   |
| 0  | 0  | 0  | 0    | 0   | 0 | 1   |
| 0  | 0  | 0  | 0    | 0   | 0 | 0   |
| 0  | 14 | 3  | 0    | 0   | 0 | 0   |
| 0  | 0  | 0  | 0    | 0   | 0 | 0   |
| 0  | 7  | 0  | 0    | 0   | 0 | 0   |
| 0  | 0  | 0  | 0    | 0   | 0 | 0   |
| 0  | 0  | 0  | 0    | 0   | 0 | 0   |
| 0  | 0  | 2  | 0    | 1   | 0 | 0   |
| 0  | 2  | 0  | 1    | 4   | 2 | 0   |
| 0  | 0  | 0  | 0    | 0   | 0 | 0   |
| 0  | 0  | 0  | 0    | 0   | 0 | 0   |
| 0  | 0  | 0  | 1    | 0   | 0 | 1   |
| 0  | 0  | 0  | 0    | 0   | 0 | 0   |
| 0  | 0  | 0  | 0    | 0   | 0 | 0   |
| 0  | 0  | 0  | 1    | 0   | 0 | 0   |
| 0  | 0  | 0  | 0    | 0   | 0 | 0   |
| 1  | 26 | 0  | 3    | 2   | 0 | 1   |
| 1  | 36 | 10 | 41   | 59  | 0 | 34  |
| 0  | 2  | 0  | 0    | 3   | 0 | 9   |
| 0  | 0  | 0  | 0    | 0   | 0 | 0   |
| 5  | 22 | 5  | 1418 | 127 | 2 | 128 |
| 1  | 2  | 0  | 0    | 0   | 1 | 0   |
| 0  | 0  | 1  | 0    | 0   | 0 | 0   |
| 0  | 0  | 0  | 0    | 0   | 0 | 0   |
| 0  | 0  | 0  | 15   | 1   | 0 | 0   |
| 1  | 0  | 0  | 0    | 12  | 0 | 0   |
| 0  | 0  | 0  | 0    | 1   | 0 | 0   |
| 0  | 0  | 0  | 0    | 0   | 0 | 0   |
| 0  | 0  | 0  | 0    | 0   | 0 | 0   |
| 0  | 0  | 0  | 1    | 3   | 0 | 0   |
| 0  | 0  | 0  | 0    | 0   | 0 | 0   |
| 0  | 0  | 0  | 0    | 0   | 0 | 0   |
| 0  | 0  | 0  | 1    | 71  | 0 | 0   |
| 21 | 12 | 7  | 98   | 0   | 1 | 34  |
| 0  | 0  | 0  | 2    | 0   | 0 | 0   |
| 32 | 0  | 8  | 6    | 19  | 0 | 3   |
| 0  | 4  | 11 | 0    | 0   | 0 | 0   |
| 0  | 0  | 0  | 0    | 0   | 0 | 0   |
| 0  | 72 | 0  | 77   | 0   | 0 | 36  |
| 0  | 0  | 0  | 0    | 0   | 0 | 0   |
| 0  | 0  | 0  | 0    | 0   | 0 | 0   |
| 0  | 0  | 0  | 0    | 0   | 0 | 0   |
| 0  | 0  | 0  | 1    | 10  | 0 | 2   |
| 0  | 0  | 0  | 6    | 0   | 0 | 7   |
| 0  | 0  | 3  | 7    | 6   | 0 | 4   |

|    |     |     |   |     |    |    |
|----|-----|-----|---|-----|----|----|
| 0  | 0   | 0   | 0 | 0   | 0  | 1  |
| 0  | 0   | 0   | 0 | 0   | 0  | 0  |
| 0  | 0   | 0   | 0 | 0   | 0  | 0  |
| 0  | 0   | 0   | 0 | 0   | 0  | 0  |
| 0  | 0   | 0   | 0 | 0   | 0  | 0  |
| 0  | 0   | 0   | 0 | 0   | 0  | 0  |
| 0  | 0   | 0   | 0 | 0   | 0  | 0  |
| 0  | 0   | 0   | 0 | 0   | 0  | 0  |
| 0  | 0   | 0   | 0 | 0   | 0  | 2  |
| 1  | 1   | 0   | 0 | 0   | 0  | 3  |
| 0  | 0   | 0   | 2 | 0   | 0  | 2  |
| 0  | 0   | 0   | 0 | 0   | 0  | 0  |
| 0  | 0   | 0   | 0 | 0   | 0  | 4  |
| 0  | 0   | 0   | 0 | 0   | 0  | 0  |
| 0  | 0   | 0   | 0 | 0   | 0  | 0  |
| 0  | 0   | 0   | 0 | 0   | 0  | 0  |
| 0  | 0   | 0   | 0 | 0   | 0  | 0  |
| 0  | 0   | 0   | 0 | 0   | 0  | 0  |
| 0  | 0   | 0   | 0 | 0   | 0  | 0  |
| 0  | 0   | 0   | 0 | 0   | 0  | 0  |
| 0  | 0   | 0   | 0 | 0   | 6  | 0  |
| 0  | 0   | 0   | 4 | 84  | 84 | 0  |
| 0  | 0   | 0   | 0 | 0   | 0  | 0  |
| 1  | 1   | 0   | 2 | 0   | 0  | 49 |
| 0  | 0   | 0   | 0 | 0   | 0  | 0  |
| 41 | 484 | 483 | 8 | 244 | 18 | 86 |
| 0  | 0   | 0   | 0 | 0   | 1  | 0  |
| 1  | 2   | 5   | 0 | 1   | 0  | 0  |
| 1  | 2   | 0   | 1 | 1   | 1  | 2  |
| 0  | 0   | 0   | 0 | 0   | 0  | 0  |
| 0  | 0   | 0   | 0 | 0   | 0  | 0  |
| 0  | 0   | 0   | 0 | 0   | 0  | 0  |
| 0  | 0   | 0   | 0 | 0   | 0  | 0  |
| 0  | 0   | 0   | 0 | 0   | 0  | 0  |
| 0  | 10  | 0   | 0 | 0   | 0  | 1  |
| 0  | 32  | 0   | 0 | 3   | 0  | 0  |
| 1  | 2   | 2   | 0 | 0   | 0  | 2  |
| 0  | 0   | 0   | 0 | 0   | 0  | 0  |
| 0  | 0   | 0   | 0 | 0   | 0  | 0  |
| 0  | 0   | 0   | 0 | 0   | 0  | 0  |
| 0  | 2   | 0   | 0 | 0   | 0  | 0  |
| 0  | 0   | 0   | 0 | 0   | 0  | 1  |
| 0  | 0   | 0   | 0 | 0   | 0  | 0  |
| 0  | 0   | 0   | 0 | 0   | 0  | 0  |
| 0  | 3   | 0   | 0 | 0   | 1  | 1  |
| 0  | 0   | 0   | 0 | 0   | 0  | 0  |
| 0  | 0   | 0   | 0 | 0   | 0  | 0  |
| 0  | 0   | 0   | 0 | 0   | 0  | 0  |
| 0  | 5   | 0   | 0 | 0   | 0  | 0  |
| 0  | 0   | 0   | 0 | 0   | 0  | 0  |

|      |      |      |      |      |      |      |
|------|------|------|------|------|------|------|
| 0    | 0    | 0    | 0    | 0    | 0    | 0    |
| 0    | 0    | 0    | 0    | 0    | 0    | 0    |
| 0    | 0    | 0    | 0    | 0    | 0    | 0    |
| 0    | 4    | 0    | 26   | 70   | 12   | 18   |
| 0    | 1    | 0    | 0    | 0    | 0    | 0    |
| 0    | 0    | 0    | 0    | 0    | 0    | 0    |
| 1    | 34   | 3    | 771  | 436  | 677  | 152  |
| 0    | 0    | 0    | 0    | 0    | 0    | 0    |
| 0    | 0    | 0    | 0    | 0    | 0    | 0    |
| 0    | 0    | 0    | 0    | 0    | 0    | 0    |
| 0    | 0    | 0    | 0    | 0    | 0    | 0    |
| 2357 | 3424 | 3942 | 1035 | 6204 | 3478 | 2162 |
| 0    | 16   | 1    | 1    | 0    | 1    | 40   |
| 39   | 102  | 46   | 5    | 34   | 19   | 127  |
| 1    | 16   | 2    | 0    | 4    | 0    | 5    |
| 4    | 17   | 11   | 140  | 1173 | 138  | 125  |
| 42   | 141  | 124  | 14   | 90   | 48   | 33   |
| 6    | 61   | 15   | 29   | 120  | 46   | 174  |
| 163  | 24   | 478  | 1    | 30   | 120  | 0    |
| 1    | 2    | 0    | 0    | 2    | 0    | 0    |
| 0    | 40   | 1    | 0    | 0    | 1    | 5    |
| 0    | 0    | 0    | 0    | 0    | 0    | 0    |
| 2    | 0    | 0    | 0    | 0    | 0    | 1    |
| 0    | 0    | 0    | 0    | 0    | 0    | 0    |
| 0    | 0    | 0    | 0    | 0    | 0    | 0    |
| 0    | 0    | 0    | 0    | 0    | 0    | 0    |
| 0    | 0    | 0    | 0    | 0    | 0    | 0    |
| 0    | 0    | 0    | 0    | 0    | 0    | 0    |
| 0    | 3    | 0    | 1    | 0    | 0    | 18   |
| 31   | 130  | 68   | 2    | 10   | 2    | 14   |
| 0    | 6    | 0    | 0    | 0    | 1    | 3    |
| 0    | 5    | 0    | 0    | 0    | 0    | 3    |
| 0    | 0    | 0    | 12   | 63   | 40   | 74   |
| 0    | 0    | 0    | 0    | 0    | 0    | 0    |
| 0    | 0    | 0    | 21   | 45   | 67   | 25   |
| 0    | 0    | 0    | 0    | 0    | 0    | 0    |
| 1    | 54   | 54   | 0    | 0    | 3    | 0    |
| 71   | 109  | 66   | 37   | 196  | 132  | 69   |
| 0    | 0    | 0    | 0    | 0    | 0    | 0    |
| 0    | 0    | 0    | 0    | 0    | 0    | 0    |
| 0    | 4    | 0    | 7    | 29   | 58   | 239  |
| 0    | 0    | 0    | 0    | 0    | 0    | 0    |
| 0    | 0    | 1    | 0    | 0    | 0    | 0    |
| 2    | 22   | 46   | 0    | 1    | 2    | 2    |
| 0    | 0    | 0    | 0    | 0    | 0    | 0    |
| 0    | 0    | 0    | 0    | 0    | 0    | 0    |
| 0    | 0    | 0    | 0    | 0    | 0    | 2    |
| 0    | 0    | 0    | 0    | 0    | 0    | 1    |
| 0    | 0    | 0    | 0    | 0    | 0    | 0    |

|    |    |    |   |    |    |   |
|----|----|----|---|----|----|---|
| 0  | 0  | 0  | 0 | 0  | 0  | 0 |
| 0  | 3  | 1  | 1 | 1  | 3  | 0 |
| 0  | 0  | 0  | 0 | 0  | 0  | 0 |
| 5  | 0  | 0  | 0 | 0  | 0  | 0 |
| 0  | 5  | 0  | 0 | 0  | 0  | 0 |
| 0  | 0  | 0  | 0 | 0  | 0  | 0 |
| 0  | 0  | 0  | 0 | 0  | 0  | 0 |
| 0  | 0  | 0  | 0 | 0  | 0  | 0 |
| 0  | 7  | 0  | 0 | 0  | 0  | 0 |
| 0  | 0  | 0  | 0 | 0  | 0  | 0 |
| 0  | 0  | 0  | 0 | 0  | 0  | 0 |
| 0  | 1  | 0  | 0 | 3  | 0  | 0 |
| 0  | 0  | 0  | 0 | 0  | 0  | 0 |
| 0  | 15 | 0  | 0 | 4  | 0  | 0 |
| 0  | 0  | 0  | 0 | 0  | 0  | 0 |
| 0  | 0  | 0  | 1 | 0  | 0  | 0 |
| 0  | 0  | 0  | 0 | 0  | 0  | 0 |
| 0  | 0  | 0  | 0 | 0  | 0  | 0 |
| 12 | 0  | 27 | 1 | 1  | 11 | 0 |
| 0  | 0  | 0  | 0 | 0  | 0  | 0 |
| 0  | 0  | 0  | 0 | 0  | 0  | 0 |
| 9  | 14 | 13 | 1 | 4  | 14 | 4 |
| 0  | 0  | 0  | 0 | 0  | 0  | 0 |
| 0  | 0  | 0  | 0 | 0  | 0  | 0 |
| 0  | 0  | 0  | 0 | 2  | 0  | 0 |
| 1  | 2  | 2  | 0 | 0  | 1  | 2 |
| 0  | 0  | 0  | 0 | 0  | 0  | 0 |
| 0  | 0  | 0  | 0 | 0  | 0  | 0 |
| 0  | 0  | 0  | 0 | 0  | 0  | 0 |
| 0  | 0  | 0  | 1 | 3  | 1  | 3 |
| 0  | 0  | 0  | 0 | 0  | 0  | 0 |
| 2  | 2  | 0  | 1 | 4  | 4  | 2 |
| 1  | 7  | 0  | 0 | 1  | 2  | 0 |
| 6  | 3  | 3  | 3 | 10 | 3  | 1 |
| 0  | 0  | 0  | 0 | 0  | 0  | 0 |
| 0  | 5  | 0  | 0 | 0  | 0  | 0 |
| 0  | 4  | 2  | 0 | 1  | 0  | 4 |
| 0  | 0  | 0  | 0 | 0  | 0  | 0 |
| 0  | 0  | 0  | 0 | 0  | 0  | 0 |
| 2  | 0  | 1  | 0 | 1  | 1  | 0 |
| 0  | 0  | 0  | 0 | 0  | 0  | 1 |
| 0  | 1  | 0  | 0 | 0  | 0  | 1 |
| 0  | 0  | 0  | 0 | 0  | 0  | 0 |
| 0  | 3  | 0  | 0 | 0  | 0  | 1 |
| 0  | 0  | 0  | 0 | 0  | 0  | 0 |
| 0  | 0  | 0  | 0 | 0  | 0  | 0 |
| 0  | 0  | 0  | 0 | 0  | 0  | 0 |
| 0  | 0  | 0  | 0 | 0  | 0  | 0 |

|   |     |   |   |    |   |    |
|---|-----|---|---|----|---|----|
| 2 | 2   | 0 | 0 | 2  | 0 | 0  |
| 1 | 0   | 0 | 0 | 2  | 0 | 0  |
| 0 | 0   | 0 | 0 | 0  | 0 | 0  |
| 0 | 1   | 0 | 0 | 0  | 0 | 0  |
| 0 | 2   | 0 | 0 | 0  | 0 | 0  |
| 0 | 0   | 0 | 0 | 0  | 1 | 0  |
| 0 | 0   | 0 | 0 | 0  | 0 | 0  |
| 0 | 0   | 0 | 0 | 0  | 0 | 0  |
| 0 | 0   | 0 | 0 | 0  | 0 | 0  |
| 0 | 0   | 0 | 1 | 0  | 0 | 0  |
| 3 | 3   | 4 | 2 | 8  | 2 | 4  |
| 0 | 0   | 0 | 0 | 0  | 0 | 0  |
| 0 | 0   | 0 | 0 | 0  | 1 | 0  |
| 0 | 0   | 0 | 0 | 0  | 0 | 0  |
| 0 | 0   | 0 | 0 | 0  | 0 | 0  |
| 0 | 0   | 0 | 0 | 0  | 0 | 0  |
| 0 | 0   | 0 | 0 | 0  | 0 | 0  |
| 0 | 0   | 1 | 0 | 0  | 0 | 0  |
| 0 | 0   | 0 | 0 | 0  | 1 | 0  |
| 0 | 0   | 0 | 0 | 0  | 1 | 0  |
| 0 | 1   | 0 | 0 | 0  | 0 | 0  |
| 0 | 0   | 0 | 0 | 0  | 0 | 0  |
| 0 | 0   | 0 | 0 | 0  | 0 | 0  |
| 0 | 0   | 0 | 0 | 1  | 0 | 0  |
| 0 | 3   | 0 | 0 | 0  | 0 | 0  |
| 0 | 2   | 0 | 0 | 0  | 1 | 0  |
| 0 | 0   | 0 | 0 | 0  | 0 | 0  |
| 0 | 2   | 0 | 0 | 0  | 0 | 0  |
| 0 | 0   | 0 | 0 | 0  | 0 | 0  |
| 0 | 0   | 0 | 0 | 0  | 0 | 0  |
| 0 | 0   | 0 | 0 | 0  | 0 | 0  |
| 1 | 72  | 0 | 6 | 73 | 0 | 2  |
| 0 | 0   | 0 | 0 | 0  | 0 | 0  |
| 0 | 40  | 0 | 0 | 3  | 0 | 1  |
| 0 | 0   | 0 | 0 | 0  | 0 | 0  |
| 0 | 0   | 0 | 0 | 0  | 0 | 0  |
| 0 | 0   | 0 | 0 | 0  | 0 | 0  |
| 0 | 18  | 0 | 0 | 4  | 1 | 3  |
| 0 | 159 | 8 | 1 | 0  | 0 | 19 |
| 1 | 172 | 0 | 0 | 1  | 0 | 1  |
| 0 | 0   | 0 | 0 | 5  | 0 | 0  |
| 0 | 5   | 0 | 0 | 1  | 0 | 2  |
| 0 | 0   | 0 | 0 | 0  | 0 | 0  |
| 0 | 1   | 0 | 0 | 0  | 0 | 0  |
| 0 | 242 | 6 | 0 | 1  | 3 | 0  |
| 0 | 0   | 0 | 0 | 0  | 0 | 0  |
| 0 | 0   | 0 | 0 | 0  | 0 | 0  |
| 0 | 0   | 0 | 0 | 0  | 0 | 0  |
| 0 | 0   | 0 | 0 | 0  | 0 | 0  |
| 0 | 0   | 0 | 0 | 0  | 0 | 0  |
| 2 | 0   | 0 | 0 | 0  | 0 | 0  |



|    |    |    |    |     |    |    |
|----|----|----|----|-----|----|----|
| 0  | 19 | 8  | 1  | 80  | 32 | 17 |
| 0  | 0  | 0  | 0  | 0   | 0  | 0  |
| 0  | 6  | 0  | 0  | 2   | 0  | 7  |
| 7  | 3  | 6  | 0  | 4   | 7  | 2  |
| 0  | 0  | 0  | 0  | 0   | 0  | 0  |
| 0  | 0  | 0  | 0  | 0   | 0  | 0  |
| 18 | 8  | 1  | 62 | 200 | 91 | 1  |
| 0  | 19 | 0  | 0  | 0   | 0  | 6  |
| 6  | 82 | 17 | 0  | 23  | 4  | 64 |
| 3  | 89 | 56 | 6  | 119 | 0  | 27 |
| 0  | 17 | 0  | 0  | 7   | 0  | 4  |
| 0  | 9  | 0  | 0  | 10  | 1  | 44 |
| 0  | 0  | 0  | 0  | 0   | 0  | 0  |
| 0  | 6  | 0  | 0  | 0   | 0  | 0  |
| 0  | 0  | 0  | 0  | 0   | 0  | 0  |
| 0  | 0  | 0  | 0  | 0   | 0  | 0  |
| 0  | 0  | 0  | 0  | 0   | 0  | 2  |
| 0  | 0  | 0  | 0  | 0   | 0  | 0  |
| 0  | 38 | 16 | 2  | 3   | 28 | 4  |
| 0  | 6  | 0  | 1  | 11  | 0  | 23 |
| 0  | 0  | 0  | 0  | 0   | 0  | 0  |
| 0  | 0  | 0  | 0  | 0   | 0  | 0  |
| 0  | 1  | 0  | 0  | 0   | 0  | 6  |
| 0  | 0  | 0  | 0  | 0   | 0  | 0  |
| 0  | 0  | 0  | 0  | 0   | 0  | 0  |
| 0  | 0  | 0  | 0  | 0   | 0  | 0  |
| 0  | 4  | 8  | 1  | 12  | 7  | 2  |
| 0  | 0  | 0  | 0  | 0   | 0  | 0  |
| 0  | 0  | 0  | 0  | 0   | 0  | 0  |
| 1  | 0  | 0  | 1  | 0   | 0  | 2  |
| 0  | 0  | 0  | 0  | 0   | 0  | 0  |
| 0  | 0  | 0  | 0  | 0   | 0  | 0  |
| 5  | 0  | 0  | 0  | 0   | 0  | 0  |
| 5  | 0  | 0  | 0  | 0   | 0  | 0  |
| 0  | 0  | 0  | 0  | 3   | 0  | 0  |
| 0  | 0  | 0  | 0  | 0   | 0  | 0  |
| 0  | 0  | 0  | 0  | 0   | 0  | 0  |
| 0  | 0  | 0  | 0  | 0   | 0  | 0  |
| 0  | 0  | 0  | 0  | 0   | 0  | 0  |
| 0  | 0  | 0  | 0  | 0   | 0  | 0  |
| 0  | 0  | 0  | 2  | 0   | 0  | 0  |
| 1  | 0  | 0  | 0  | 0   | 0  | 0  |
| 0  | 0  | 0  | 0  | 0   | 0  | 0  |
| 0  | 9  | 0  | 0  | 7   | 2  | 50 |
| 0  | 11 | 0  | 1  | 0   | 1  | 11 |
| 0  | 0  | 0  | 0  | 0   | 0  | 0  |
| 12 | 9  | 6  | 0  | 0   | 7  | 0  |
| 0  | 0  | 0  | 1  | 1   | 0  | 2  |
| 0  | 0  | 0  | 0  | 0   | 0  | 0  |



|    |    |    |    |    |     |    |
|----|----|----|----|----|-----|----|
| 6  | 7  | 1  | 0  | 2  | 0   | 0  |
| 17 | 36 | 79 | 24 | 50 | 370 | 31 |
| 8  | 0  | 0  | 8  | 59 | 4   | 46 |
| 3  | 6  | 20 | 0  | 4  | 4   | 31 |
| 3  | 9  | 47 | 1  | 10 | 5   | 4  |
| 0  | 3  | 0  | 0  | 1  | 2   | 0  |
| 2  | 1  | 0  | 0  | 11 | 5   | 39 |
| 8  | 8  | 0  | 6  | 31 | 64  | 0  |
| 0  | 9  | 12 | 7  | 6  | 4   | 3  |
| 1  | 0  | 0  | 3  | 1  | 1   | 0  |
| 5  | 19 | 4  | 1  | 10 | 0   | 4  |
| 0  | 3  | 3  | 1  | 18 | 3   | 32 |
| 1  | 1  | 0  | 0  | 13 | 7   | 0  |
| 1  | 0  | 1  | 10 | 55 | 21  | 29 |
| 4  | 5  | 18 | 0  | 4  | 0   | 0  |
| 3  | 3  | 0  | 2  | 3  | 1   | 18 |
| 1  | 0  | 0  | 2  | 17 | 17  | 17 |
| 1  | 13 | 0  | 4  | 47 | 1   | 38 |
| 0  | 0  | 0  | 0  | 0  | 0   | 0  |
| 1  | 7  | 3  | 4  | 2  | 13  | 4  |
| 5  | 5  | 7  | 1  | 2  | 0   | 1  |
| 1  | 2  | 0  | 7  | 6  | 3   | 95 |
| 0  | 0  | 0  | 0  | 0  | 0   | 0  |
| 0  | 0  | 0  | 0  | 0  | 0   | 0  |
| 0  | 0  | 4  | 0  | 0  | 0   | 2  |
| 0  | 1  | 0  | 0  | 0  | 3   | 0  |
| 0  | 4  | 2  | 0  | 1  | 1   | 0  |
| 0  | 0  | 0  | 3  | 10 | 0   | 4  |
| 0  | 0  | 0  | 0  | 0  | 0   | 0  |
| 0  | 1  | 0  | 0  | 0  | 0   | 0  |
| 0  | 0  | 0  | 0  | 0  | 0   | 0  |
| 0  | 0  | 0  | 0  | 0  | 0   | 0  |
| 0  | 0  | 0  | 0  | 0  | 0   | 0  |
| 0  | 0  | 0  | 0  | 0  | 1   | 0  |
| 0  | 2  | 0  | 0  | 0  | 0   | 0  |
| 0  | 5  | 0  | 0  | 18 | 0   | 0  |
| 3  | 0  | 0  | 0  | 2  | 1   | 0  |
| 0  | 14 | 0  | 0  | 10 | 0   | 0  |
| 4  | 1  | 2  | 5  | 3  | 3   | 0  |
| 0  | 0  | 0  | 0  | 0  | 0   | 0  |
| 0  | 0  | 0  | 0  | 0  | 0   | 0  |
| 0  | 0  | 0  | 0  | 0  | 0   | 0  |
| 0  | 0  | 0  | 0  | 0  | 0   | 0  |
| 0  | 0  | 0  | 0  | 2  | 0   | 8  |
| 0  | 0  | 0  | 0  | 0  | 0   | 0  |
| 0  | 0  | 0  | 0  | 0  | 2   | 0  |
| 0  | 0  | 0  | 0  | 0  | 0   | 0  |
| 0  | 0  | 4  | 0  | 1  | 1   | 0  |
| 0  | 0  | 0  | 0  | 0  | 0   | 0  |

|     |     |     |     |     |     |    |
|-----|-----|-----|-----|-----|-----|----|
| 0   | 3   | 0   | 0   | 0   | 0   | 1  |
| 0   | 0   | 1   | 0   | 0   | 0   | 0  |
| 0   | 0   | 0   | 0   | 0   | 0   | 0  |
| 0   | 0   | 0   | 0   | 0   | 0   | 0  |
| 0   | 0   | 1   | 0   | 0   | 0   | 0  |
| 7   | 0   | 10  | 1   | 7   | 21  | 4  |
| 0   | 0   | 0   | 0   | 0   | 0   | 0  |
| 13  | 226 | 61  | 27  | 504 | 56  | 87 |
| 1   | 1   | 0   | 0   | 0   | 1   | 1  |
| 8   | 1   | 0   | 8   | 2   | 0   | 0  |
| 0   | 0   | 19  | 5   | 0   | 0   | 0  |
| 0   | 0   | 0   | 0   | 0   | 0   | 0  |
| 0   | 0   | 0   | 0   | 1   | 0   | 5  |
| 0   | 0   | 0   | 0   | 0   | 0   | 0  |
| 0   | 0   | 0   | 0   | 0   | 0   | 1  |
| 0   | 0   | 0   | 0   | 0   | 0   | 3  |
| 0   | 0   | 0   | 0   | 0   | 0   | 0  |
| 0   | 0   | 0   | 0   | 0   | 0   | 0  |
| 0   | 0   | 0   | 0   | 0   | 0   | 0  |
| 0   | 1   | 0   | 0   | 0   | 0   | 0  |
| 0   | 0   | 0   | 0   | 0   | 0   | 0  |
| 0   | 0   | 0   | 0   | 0   | 0   | 0  |
| 0   | 0   | 0   | 0   | 0   | 0   | 0  |
| 0   | 0   | 0   | 0   | 0   | 0   | 0  |
| 0   | 0   | 2   | 0   | 1   | 0   | 0  |
| 0   | 0   | 0   | 0   | 0   | 0   | 0  |
| 0   | 0   | 0   | 0   | 0   | 0   | 0  |
| 0   | 0   | 0   | 0   | 0   | 0   | 0  |
| 1   | 0   | 0   | 0   | 0   | 0   | 0  |
| 0   | 0   | 0   | 0   | 0   | 0   | 0  |
| 0   | 0   | 0   | 0   | 0   | 0   | 0  |
| 0   | 0   | 0   | 0   | 0   | 0   | 0  |
| 4   | 0   | 12  | 0   | 7   | 0   | 13 |
| 11  | 0   | 0   | 8   | 15  | 25  | 1  |
| 0   | 0   | 0   | 5   | 0   | 0   | 0  |
| 0   | 0   | 0   | 0   | 0   | 0   | 0  |
| 0   | 0   | 0   | 0   | 0   | 0   | 0  |
| 6   | 104 | 30  | 325 | 218 | 25  | 25 |
| 122 | 244 | 156 | 177 | 56  | 139 | 11 |
| 16  | 0   | 0   | 242 | 2   | 611 | 1  |
| 0   | 0   | 0   | 197 | 9   | 234 | 8  |
| 0   | 0   | 0   | 0   | 0   | 0   | 0  |
| 0   | 2   | 0   | 1   | 2   | 0   | 0  |
| 0   | 0   | 0   | 0   | 0   | 0   | 0  |
| 0   | 0   | 0   | 1   | 0   | 0   | 0  |
| 0   | 0   | 0   | 2   | 0   | 1   | 0  |
| 0   | 0   | 2   | 0   | 0   | 0   | 0  |
| 0   | 0   | 0   | 0   | 0   | 0   | 0  |
| 0   | 0   | 0   | 0   | 0   | 0   | 0  |
| 0   | 0   | 0   | 0   | 3   | 0   | 0  |



|     |     |     |     |     |     |     |
|-----|-----|-----|-----|-----|-----|-----|
| 0   | 0   | 0   | 0   | 0   | 0   | 0   |
| 167 | 125 | 150 | 230 | 238 | 476 | 117 |
| 37  | 11  | 13  | 33  | 99  | 39  | 2   |
| 38  | 25  | 31  | 0   | 4   | 11  | 0   |
| 16  | 0   | 0   | 42  | 24  | 65  | 3   |
| 0   | 0   | 0   | 0   | 0   | 0   | 0   |
| 50  | 1   | 0   | 11  | 6   | 11  | 1   |
| 15  | 3   | 0   | 12  | 4   | 20  | 0   |
| 38  | 2   | 57  | 10  | 3   | 24  | 14  |
| 0   | 23  | 0   | 0   | 12  | 2   | 6   |
| 1   | 1   | 2   | 0   | 0   | 0   | 3   |
| 0   | 6   | 0   | 0   | 0   | 1   | 44  |
| 18  | 0   | 0   | 0   | 0   | 10  | 0   |
| 0   | 0   | 0   | 2   | 3   | 5   | 35  |
| 3   | 0   | 0   | 6   | 5   | 7   | 2   |
| 0   | 5   | 0   | 0   | 0   | 0   | 0   |
| 0   | 0   | 0   | 0   | 0   | 0   | 0   |
| 0   | 0   | 0   | 0   | 0   | 0   | 8   |
| 0   | 1   | 0   | 4   | 13  | 4   | 5   |
| 0   | 0   | 0   | 0   | 0   | 0   | 0   |
| 2   | 4   | 1   | 3   | 1   | 6   | 2   |
| 0   | 0   | 0   | 0   | 0   | 0   | 0   |
| 0   | 0   | 1   | 0   | 0   | 0   | 0   |
| 0   | 1   | 0   | 0   | 0   | 0   | 2   |
| 0   | 0   | 0   | 0   | 0   | 0   | 0   |
| 0   | 0   | 0   | 0   | 0   | 0   | 0   |
| 0   | 0   | 0   | 0   | 0   | 0   | 0   |
| 0   | 0   | 0   | 0   | 0   | 0   | 0   |
| 0   | 0   | 0   | 0   | 0   | 0   | 0   |
| 0   | 0   | 0   | 0   | 0   | 0   | 0   |
| 0   | 0   | 0   | 0   | 0   | 0   | 0   |
| 0   | 0   | 0   | 0   | 0   | 0   | 0   |
| 2   | 0   | 0   | 0   | 0   | 0   | 0   |
| 0   | 0   | 0   | 0   | 0   | 0   | 0   |
| 0   | 7   | 0   | 196 | 733 | 14  | 186 |
| 42  | 58  | 14  | 30  | 66  | 52  | 34  |
| 101 | 66  | 7   | 200 | 659 | 387 | 1   |
| 168 | 7   | 11  | 9   | 31  | 27  | 0   |
| 3   | 0   | 0   | 41  | 8   | 5   | 0   |
| 0   | 0   | 0   | 1   | 0   | 0   | 0   |
| 12  | 97  | 42  | 19  | 68  | 42  | 39  |
| 18  | 18  | 45  | 114 | 164 | 122 | 133 |
| 45  | 111 | 18  | 6   | 10  | 8   | 32  |
| 31  | 5   | 3   | 85  | 113 | 199 | 64  |
| 0   | 8   | 0   | 0   | 0   | 0   | 0   |
| 1   | 2   | 0   | 0   | 0   | 3   | 9   |
| 1   | 0   | 0   | 12  | 10  | 0   | 2   |
| 6   | 0   | 0   | 0   | 0   | 0   | 2   |
| 0   | 0   | 5   | 3   | 1   | 0   | 0   |
| 0   | 1   | 0   | 2   | 0   | 0   | 1   |



|      |      |      |      |      |      |     |
|------|------|------|------|------|------|-----|
| 3492 | 6190 | 3054 | 2416 | 3248 | 9283 | 349 |
| 29   | 46   | 15   | 51   | 188  | 31   | 2   |
| 0    | 0    | 0    | 0    | 0    | 0    | 0   |
| 0    | 0    | 0    | 0    | 0    | 0    | 0   |
| 1    | 0    | 0    | 0    | 0    | 0    | 0   |
| 0    | 3    | 1    | 0    | 1    | 1    | 0   |
| 0    | 0    | 0    | 0    | 0    | 0    | 0   |
| 0    | 0    | 0    | 0    | 0    | 0    | 0   |
| 0    | 0    | 0    | 0    | 0    | 1    | 0   |
| 0    | 2    | 0    | 0    | 0    | 0    | 0   |
| 0    | 0    | 0    | 0    | 0    | 0    | 0   |
| 0    | 0    | 0    | 0    | 0    | 0    | 0   |
| 41   | 61   | 7    | 65   | 64   | 72   | 3   |
| 0    | 133  | 0    | 184  | 44   | 41   | 25  |
| 0    | 0    | 0    | 0    | 0    | 0    | 0   |
| 0    | 0    | 0    | 0    | 0    | 0    | 0   |
| 0    | 0    | 0    | 0    | 0    | 0    | 0   |
| 0    | 0    | 0    | 0    | 0    | 0    | 0   |
| 0    | 0    | 0    | 0    | 6    | 0    | 0   |
| 98   | 126  | 28   | 90   | 84   | 415  | 1   |
| 2    | 4    | 0    | 1    | 0    | 0    | 0   |
| 0    | 0    | 0    | 0    | 0    | 0    | 0   |
| 0    | 0    | 0    | 0    | 0    | 5    | 0   |
| 0    | 1    | 2    | 0    | 0    | 0    | 0   |
| 48   | 53   | 11   | 107  | 220  | 44   | 29  |
| 0    | 0    | 0    | 0    | 0    | 0    | 0   |
| 0    | 0    | 0    | 0    | 0    | 0    | 0   |
| 0    | 3    | 0    | 86   | 8    | 509  | 518 |
| 6    | 25   | 19   | 1    | 4    | 1    | 1   |
| 381  | 46   | 277  | 52   | 113  | 186  | 30  |
| 0    | 5    | 4    | 52   | 15   | 128  | 11  |
| 0    | 0    | 0    | 0    | 0    | 1    | 1   |
| 153  | 17   | 28   | 16   | 6    | 17   | 1   |
| 0    | 0    | 4    | 1    | 0    | 2    | 0   |
| 57   | 6    | 8    | 19   | 14   | 46   | 2   |
| 23   | 4    | 4    | 1    | 0    | 0    | 0   |
| 10   | 51   | 8    | 22   | 34   | 3    | 0   |
| 0    | 0    | 0    | 0    | 2    | 0    | 11  |
| 0    | 0    | 0    | 0    | 0    | 0    | 0   |
| 0    | 1    | 0    | 0    | 0    | 0    | 0   |
| 0    | 0    | 0    | 0    | 0    | 0    | 0   |
| 0    | 0    | 0    | 0    | 0    | 0    | 0   |
| 0    | 0    | 0    | 0    | 0    | 0    | 0   |
| 53   | 33   | 0    | 2    | 1    | 53   | 1   |
| 72   | 151  | 149  | 342  | 334  | 18   | 45  |
| 2    | 4    | 0    | 31   | 54   | 21   | 27  |
| 0    | 0    | 1    | 0    | 0    | 0    | 0   |
| 11   | 0    | 0    | 0    | 0    | 0    | 0   |



|     |     |      |      |      |      |     |
|-----|-----|------|------|------|------|-----|
| 0   | 0   | 0    | 0    | 0    | 0    | 0   |
| 0   | 0   | 0    | 0    | 0    | 0    | 0   |
| 0   | 0   | 0    | 0    | 0    | 1    | 0   |
| 0   | 0   | 0    | 0    | 0    | 6    | 0   |
| 0   | 0   | 0    | 0    | 0    | 0    | 0   |
| 1   | 0   | 0    | 0    | 0    | 0    | 0   |
| 0   | 0   | 0    | 1    | 0    | 0    | 0   |
| 0   | 0   | 0    | 3    | 0    | 1    | 0   |
| 4   | 0   | 0    | 1    | 0    | 3    | 0   |
| 1   | 79  | 3    | 3    | 6    | 7    | 0   |
| 0   | 0   | 0    | 0    | 0    | 0    | 0   |
| 0   | 0   | 1    | 3    | 3    | 7    | 0   |
| 0   | 0   | 0    | 0    | 0    | 0    | 0   |
| 0   | 0   | 0    | 0    | 0    | 0    | 0   |
| 0   | 0   | 0    | 0    | 0    | 0    | 0   |
| 155 | 449 | 2476 | 3803 | 4929 | 7031 | 216 |
| 34  | 657 | 195  | 48   | 208  | 3    | 49  |
| 0   | 3   | 0    | 103  | 57   | 7    | 0   |
| 0   | 0   | 1    | 0    | 0    | 0    | 0   |
| 0   | 0   | 0    | 0    | 0    | 0    | 0   |
| 1   | 0   | 0    | 13   | 7    | 16   | 4   |
| 0   | 0   | 0    | 4    | 0    | 0    | 0   |
| 0   | 0   | 0    | 0    | 0    | 0    | 0   |
| 0   | 0   | 0    | 0    | 0    | 0    | 0   |
| 1   | 3   | 0    | 17   | 31   | 63   | 3   |
| 0   | 0   | 0    | 2    | 1    | 2    | 0   |
| 2   | 0   | 0    | 2    | 2    | 6    | 0   |
| 0   | 0   | 1    | 1    | 3    | 1    | 0   |
| 15  | 29  | 5    | 136  | 48   | 600  | 8   |
| 66  | 102 | 47   | 93   | 117  | 115  | 7   |
| 65  | 85  | 8    | 422  | 226  | 203  | 1   |
| 71  | 67  | 16   | 70   | 81   | 40   | 64  |
| 50  | 9   | 17   | 18   | 32   | 75   | 17  |
| 0   | 0   | 0    | 0    | 0    | 0    | 0   |
| 0   | 0   | 0    | 0    | 0    | 0    | 0   |
| 0   | 0   | 0    | 0    | 0    | 0    | 0   |
| 0   | 0   | 0    | 0    | 0    | 0    | 0   |
| 0   | 0   | 0    | 0    | 0    | 0    | 0   |
| 582 | 972 | 214  | 3132 | 3535 | 1356 | 420 |
| 32  | 248 | 35   | 81   | 88   | 252  | 72  |
| 11  | 283 | 1    | 8    | 32   | 22   | 7   |
| 0   | 0   | 0    | 0    | 0    | 0    | 0   |
| 39  | 123 | 88   | 17   | 20   | 21   | 11  |
| 0   | 0   | 0    | 0    | 0    | 0    | 0   |
| 0   | 0   | 0    | 0    | 0    | 0    | 0   |
| 1   | 5   | 0    | 0    | 0    | 0    | 0   |
| 0   | 0   | 0    | 0    | 0    | 0    | 0   |
| 0   | 2   | 0    | 0    | 0    | 0    | 0   |

|      |      |     |      |      |      |    |
|------|------|-----|------|------|------|----|
| 0    | 0    | 0   | 0    | 1    | 0    | 0  |
| 0    | 0    | 0   | 0    | 0    | 0    | 0  |
| 0    | 0    | 0   | 1    | 3    | 0    | 0  |
| 0    | 0    | 0   | 0    | 0    | 0    | 0  |
| 0    | 0    | 0   | 0    | 0    | 1    | 0  |
| 0    | 0    | 0   | 0    | 0    | 0    | 0  |
| 0    | 0    | 0   | 0    | 0    | 0    | 0  |
| 0    | 0    | 0   | 0    | 0    | 0    | 0  |
| 0    | 0    | 0   | 0    | 0    | 0    | 0  |
| 0    | 0    | 0   | 0    | 0    | 0    | 0  |
| 0    | 0    | 0   | 1    | 0    | 0    | 0  |
| 0    | 2    | 0   | 0    | 0    | 0    | 2  |
| 0    | 1    | 0   | 59   | 93   | 145  | 22 |
| 0    | 0    | 0   | 0    | 0    | 0    | 0  |
| 0    | 0    | 0   | 0    | 0    | 0    | 0  |
| 24   | 3    | 73  | 9    | 29   | 62   | 14 |
| 0    | 0    | 0   | 6    | 0    | 143  | 0  |
| 0    | 1    | 0   | 0    | 0    | 0    | 0  |
| 10   | 8    | 8   | 3    | 22   | 5    | 1  |
| 3    | 77   | 11  | 2    | 5    | 6    | 0  |
| 0    | 0    | 0   | 6    | 3    | 3    | 0  |
| 2    | 0    | 0   | 0    | 0    | 0    | 0  |
| 0    | 0    | 0   | 0    | 0    | 0    | 0  |
| 0    | 0    | 0   | 0    | 0    | 3    | 3  |
| 0    | 0    | 0   | 0    | 0    | 0    | 0  |
| 0    | 0    | 0   | 2    | 0    | 5    | 0  |
| 1815 | 859  | 546 | 2185 | 1099 | 4681 | 20 |
| 995  | 1262 | 443 | 21   | 25   | 23   | 91 |
| 5    | 13   | 3   | 8    | 1    | 15   | 0  |
| 0    | 0    | 0   | 34   | 34   | 6    | 0  |
| 4    | 2    | 0   | 2    | 1    | 5    | 0  |
| 3    | 707  | 87  | 2    | 12   | 7    | 38 |
| 10   | 14   | 0   | 0    | 1    | 2    | 0  |
| 0    | 0    | 0   | 0    | 0    | 0    | 0  |
| 0    | 0    | 0   | 0    | 0    | 0    | 0  |
| 0    | 0    | 0   | 0    | 0    | 0    | 0  |
| 0    | 0    | 0   | 0    | 0    | 0    | 0  |
| 0    | 0    | 0   | 0    | 0    | 0    | 0  |
| 0    | 0    | 0   | 0    | 0    | 0    | 0  |
| 0    | 0    | 0   | 0    | 0    | 0    | 0  |
| 0    | 0    | 0   | 0    | 0    | 0    | 0  |
| 0    | 0    | 0   | 0    | 0    | 0    | 0  |
| 0    | 0    | 0   | 0    | 0    | 0    | 0  |
| 0    | 0    | 0   | 0    | 0    | 0    | 0  |
| 0    | 0    | 0   | 0    | 0    | 0    | 0  |
| 0    | 0    | 0   | 0    | 0    | 0    | 0  |
| 0    | 0    | 0   | 0    | 0    | 0    | 0  |
| 0    | 0    | 0   | 0    | 0    | 0    | 0  |
| 0    | 3    | 0   | 29   | 17   | 1    | 19 |
| 5    | 0    | 0   | 46   | 89   | 31   | 0  |
| 1    | 0    | 0   | 0    | 7    | 1    | 0  |
| 0    | 0    | 0   | 0    | 0    | 0    | 0  |
| 0    | 0    | 0   | 0    | 0    | 0    | 0  |
| 0    | 0    | 0   | 0    | 0    | 3    | 0  |





|      |      |      |      |      |      |      |
|------|------|------|------|------|------|------|
| 0    | 0    | 0    | 0    | 0    | 0    | 0    |
| 0    | 0    | 0    | 0    | 0    | 0    | 0    |
| 0    | 0    | 0    | 0    | 0    | 0    | 0    |
| 65   | 35   | 210  | 12   | 254  | 116  | 252  |
| 10   | 1    | 1    | 0    | 0    | 1    | 0    |
| 11   | 0    | 0    | 3    | 10   | 0    | 0    |
| 0    | 0    | 0    | 0    | 0    | 0    | 0    |
| 0    | 0    | 0    | 0    | 0    | 0    | 0    |
| 274  | 594  | 87   | 804  | 782  | 2408 | 368  |
| 4104 | 2292 | 2254 | 4555 | 5696 | 6899 | 2562 |
| 0    | 0    | 4    | 11   | 41   | 60   | 67   |
| 85   | 0    | 8    | 0    | 0    | 1    | 0    |
| 148  | 154  | 254  | 167  | 141  | 808  | 105  |
| 72   | 3    | 90   | 51   | 12   | 154  | 50   |
| 0    | 21   | 0    | 2    | 30   | 0    | 14   |
| 8    | 19   | 20   | 7    | 23   | 30   | 7    |
| 8    | 2    | 0    | 0    | 8    | 0    | 0    |
| 9    | 8    | 16   | 0    | 0    | 2    | 1    |
| 26   | 1    | 10   | 4    | 0    | 13   | 0    |
| 49   | 11   | 5    | 25   | 20   | 38   | 27   |
| 39   | 6    | 17   | 54   | 31   | 75   | 18   |
| 26   | 5    | 20   | 21   | 6    | 20   | 12   |
| 0    | 10   | 0    | 0    | 3    | 1    | 0    |
| 0    | 0    | 0    | 0    | 4    | 0    | 0    |
| 0    | 0    | 0    | 8    | 38   | 1    | 47   |
| 3    | 7    | 11   | 2    | 2    | 29   | 1    |
| 1    | 42   | 11   | 0    | 0    | 2    | 1    |
| 46   | 11   | 13   | 33   | 35   | 24   | 4    |
| 2    | 2    | 0    | 7    | 18   | 4    | 2    |
| 0    | 0    | 0    | 0    | 0    | 0    | 0    |
| 2    | 0    | 1    | 2    | 16   | 5    | 23   |
| 5    | 0    | 0    | 0    | 0    | 6    | 0    |
| 7    | 3    | 1    | 6    | 7    | 10   | 2    |
| 0    | 5    | 0    | 1    | 3    | 1    | 0    |
| 0    | 0    | 0    | 0    | 0    | 1    | 0    |
| 0    | 0    | 0    | 1    | 36   | 0    | 0    |
| 1    | 3    | 0    | 0    | 5    | 1    | 1    |
| 3    | 12   | 1    | 4    | 9    | 1    | 2    |
| 0    | 1    | 0    | 0    | 0    | 0    | 4    |
| 0    | 0    | 0    | 2    | 2    | 0    | 0    |
| 0    | 0    | 0    | 0    | 0    | 0    | 0    |
| 0    | 0    | 0    | 4    | 0    | 11   | 0    |
| 0    | 0    | 1    | 0    | 0    | 0    | 0    |
| 0    | 0    | 0    | 0    | 0    | 6    | 0    |
| 1    | 0    | 0    | 0    | 0    | 0    | 0    |
| 1    | 0    | 0    | 0    | 0    | 0    | 0    |
| 0    | 2    | 1    | 0    | 0    | 1    | 0    |
| 0    | 0    | 0    | 0    | 0    | 0    | 0    |



|      |     |      |      |     |      |     |
|------|-----|------|------|-----|------|-----|
| 0    | 0   | 0    | 0    | 0   | 0    | 0   |
| 995  | 189 | 814  | 465  | 304 | 1217 | 484 |
| 676  | 257 | 117  | 97   | 89  | 154  | 63  |
| 58   | 17  | 89   | 59   | 20  | 155  | 44  |
| 228  | 1   | 40   | 0    | 0   | 0    | 0   |
| 107  | 40  | 291  | 24   | 26  | 134  | 23  |
| 47   | 10  | 89   | 255  | 10  | 67   | 19  |
| 43   | 0   | 8    | 3    | 6   | 5    | 1   |
| 17   | 0   | 25   | 0    | 0   | 0    | 6   |
| 91   | 32  | 116  | 29   | 64  | 193  | 93  |
| 2    | 2   | 5    | 0    | 0   | 0    | 1   |
| 2    | 6   | 0    | 1    | 1   | 2    | 5   |
| 1    | 0   | 4    | 6    | 1   | 5    | 1   |
| 5    | 2   | 5    | 2    | 0   | 7    | 0   |
| 0    | 0   | 0    | 2    | 3   | 5    | 1   |
| 0    | 0   | 0    | 0    | 0   | 0    | 0   |
| 32   | 21  | 21   | 14   | 15  | 24   | 16  |
| 4    | 1   | 0    | 0    | 7   | 2    | 2   |
| 1    | 1   | 3    | 1    | 0   | 0    | 3   |
| 1    | 0   | 0    | 3    | 0   | 0    | 2   |
| 2    | 0   | 0    | 3    | 6   | 3    | 1   |
| 4    | 1   | 2    | 0    | 0   | 5    | 0   |
| 11   | 1   | 0    | 3    | 2   | 8    | 2   |
| 0    | 0   | 0    | 0    | 0   | 0    | 0   |
| 0    | 0   | 0    | 0    | 7   | 2    | 0   |
| 1    | 0   | 0    | 0    | 1   | 3    | 0   |
| 0    | 0   | 0    | 0    | 0   | 0    | 0   |
| 0    | 1   | 0    | 1    | 1   | 1    | 0   |
| 2    | 0   | 0    | 1    | 0   | 0    | 0   |
| 2    | 1   | 0    | 1    | 0   | 5    | 0   |
| 1    | 0   | 0    | 0    | 0   | 0    | 0   |
| 0    | 0   | 0    | 0    | 0   | 0    | 0   |
| 0    | 0   | 0    | 0    | 0   | 0    | 0   |
| 0    | 0   | 1    | 0    | 1   | 2    | 0   |
| 0    | 0   | 0    | 0    | 0   | 1    | 0   |
| 0    | 0   | 0    | 0    | 0   | 0    | 0   |
| 1004 | 38  | 3745 | 1398 | 172 | 742  | 37  |
| 23   | 18  | 26   | 1    | 19  | 18   | 51  |
| 0    | 0   | 0    | 0    | 0   | 0    | 0   |
| 0    | 0   | 0    | 0    | 0   | 0    | 0   |
| 1    | 0   | 1    | 0    | 0   | 0    | 0   |
| 0    | 6   | 0    | 0    | 0   | 0    | 0   |
| 0    | 0   | 0    | 9    | 0   | 5    | 0   |
| 0    | 0   | 0    | 0    | 0   | 0    | 0   |
| 0    | 0   | 0    | 0    | 0   | 0    | 0   |
| 1    | 0   | 0    | 0    | 0   | 0    | 0   |
| 1    | 0   | 0    | 0    | 0   | 0    | 0   |
| 0    | 0   | 0    | 0    | 0   | 0    | 0   |







|   |      |    |   |    |    |     |
|---|------|----|---|----|----|-----|
| 1 | 3    | 0  | 0 | 0  | 1  | 2   |
| 0 | 0    | 0  | 0 | 0  | 0  | 0   |
| 0 | 0    | 0  | 0 | 0  | 0  | 0   |
| 0 | 10   | 0  | 0 | 0  | 0  | 9   |
| 0 | 0    | 0  | 0 | 1  | 0  | 0   |
| 0 | 0    | 0  | 0 | 0  | 0  | 0   |
| 1 | 157  | 10 | 4 | 45 | 0  | 5   |
| 0 | 0    | 0  | 1 | 0  | 0  | 1   |
| 0 | 0    | 0  | 0 | 6  | 0  | 0   |
| 0 | 0    | 0  | 0 | 0  | 0  | 0   |
| 0 | 0    | 0  | 0 | 0  | 0  | 0   |
| 0 | 0    | 0  | 0 | 0  | 0  | 0   |
| 0 | 6    | 0  | 0 | 1  | 0  | 0   |
| 0 | 0    | 0  | 0 | 0  | 0  | 0   |
| 0 | 1227 | 0  | 4 | 11 | 20 | 516 |
| 0 | 0    | 0  | 0 | 0  | 0  | 0   |
| 0 | 1    | 0  | 0 | 0  | 0  | 0   |
| 0 | 0    | 0  | 0 | 0  | 0  | 0   |
| 0 | 0    | 0  | 0 | 0  | 0  | 3   |
| 0 | 0    | 0  | 0 | 0  | 0  | 0   |
| 0 | 0    | 0  | 0 | 0  | 0  | 0   |
| 0 | 0    | 0  | 0 | 0  | 0  | 0   |
| 0 | 0    | 0  | 0 | 0  | 0  | 0   |
| 0 | 1    | 0  | 0 | 0  | 0  | 0   |
| 0 | 0    | 0  | 0 | 0  | 0  | 0   |
| 0 | 0    | 0  | 0 | 0  | 0  | 0   |
| 0 | 0    | 0  | 0 | 0  | 0  | 0   |
| 0 | 0    | 0  | 0 | 0  | 0  | 0   |

| 24.SUR | 25.SUR | 25.DCM | 26.SUR | 30.SUR | 30.DCM | 31.SUR |   |
|--------|--------|--------|--------|--------|--------|--------|---|
| 0      | 0      | 0      | 0      | 0      | 0      | 0      | 0 |
| 0      | 0      | 0      | 0      | 0      | 0      | 0      | 0 |
| 0      | 0      | 0      | 0      | 0      | 0      | 0      | 0 |
| 0      | 4      | 0      | 0      | 0      | 0      | 0      | 0 |
| 0      | 0      | 0      | 0      | 0      | 0      | 0      | 0 |
| 0      | 0      | 0      | 0      | 0      | 0      | 0      | 0 |
| 0      | 0      | 0      | 0      | 0      | 0      | 0      | 0 |
| 0      | 0      | 0      | 1      | 0      | 0      | 4      | 5 |
| 0      | 0      | 0      | 0      | 2      | 0      | 0      | 0 |
| 0      | 0      | 0      | 0      | 0      | 0      | 1      | 0 |
| 0      | 0      | 0      | 0      | 0      | 0      | 0      | 0 |
| 0      | 0      | 0      | 0      | 0      | 0      | 0      | 0 |
| 0      | 0      | 0      | 0      | 0      | 0      | 0      | 0 |
| 1      | 0      | 0      | 0      | 0      | 0      | 0      | 0 |
| 0      | 1      | 4      | 4      | 0      | 0      | 0      | 0 |
| 0      | 0      | 0      | 0      | 0      | 1      | 0      | 0 |
| 0      | 0      | 133    | 1      | 1      | 1      | 1      | 4 |
| 349    | 420    | 104    | 704    | 71     | 50     | 260    |   |
| 1      | 0      | 0      | 18     | 0      | 0      | 0      | 0 |
| 0      | 0      | 3      | 0      | 0      | 5      | 0      | 0 |
| 0      | 0      | 0      | 0      | 0      | 2      | 0      | 0 |
| 0      | 0      | 0      | 0      | 0      | 0      | 0      | 0 |
| 1      | 0      | 0      | 0      | 0      | 0      | 0      | 0 |
| 0      | 0      | 0      | 0      | 0      | 0      | 0      | 0 |
| 0      | 0      | 0      | 0      | 0      | 0      | 0      | 0 |
| 0      | 0      | 0      | 0      | 0      | 0      | 0      | 0 |
| 0      | 0      | 0      | 0      | 0      | 0      | 0      | 0 |
| 0      | 0      | 0      | 0      | 1      | 0      | 0      | 0 |
| 0      | 0      | 1      | 0      | 0      | 0      | 0      | 0 |
| 0      | 0      | 2      | 1      | 0      | 1      | 0      | 0 |
| 0      | 0      | 1      | 0      | 0      | 0      | 0      | 0 |
| 0      | 0      | 0      | 0      | 0      | 0      | 0      | 0 |
| 0      | 0      | 14     | 0      | 0      | 0      | 0      | 0 |
| 0      | 0      | 0      | 0      | 0      | 0      | 0      | 0 |
| 0      | 0      | 0      | 0      | 0      | 0      | 0      | 0 |
| 0      | 0      | 0      | 0      | 0      | 0      | 0      | 0 |
| 2      | 0      | 0      | 0      | 2      | 0      | 0      | 0 |
| 127    | 429    | 87     | 264    | 147    | 177    | 646    |   |
| 1      | 1      | 0      | 0      | 0      | 0      | 0      | 0 |
| 0      | 0      | 25     | 0      | 0      | 2233   | 0      | 0 |
| 0      | 0      | 43     | 0      | 0      | 0      | 0      | 0 |
| 0      | 2      | 12     | 0      | 0      | 0      | 0      | 0 |
| 0      | 0      | 0      | 0      | 0      | 0      | 18     | 0 |
| 31     | 0      | 9      | 73     | 0      | 0      | 58     | 0 |
| 0      | 16     | 28     | 0      | 0      | 23     | 0      | 0 |
| 0      | 0      | 10     | 0      | 0      | 0      | 0      | 0 |
| 0      | 0      | 40     | 0      | 0      | 0      | 17     | 0 |



|    |   |     |    |    |     |    |
|----|---|-----|----|----|-----|----|
| 0  | 0 | 0   | 0  | 0  | 0   | 0  |
| 0  | 0 | 0   | 0  | 0  | 0   | 0  |
| 0  | 0 | 0   | 0  | 0  | 0   | 0  |
| 0  | 0 | 0   | 0  | 0  | 0   | 17 |
| 0  | 0 | 0   | 0  | 0  | 0   | 0  |
| 18 | 3 | 2   | 4  | 0  | 12  | 4  |
| 2  | 0 | 0   | 0  | 0  | 0   | 0  |
| 0  | 0 | 0   | 0  | 0  | 0   | 0  |
| 0  | 0 | 0   | 0  | 0  | 0   | 0  |
| 0  | 0 | 0   | 0  | 0  | 0   | 0  |
| 0  | 0 | 0   | 0  | 0  | 0   | 0  |
| 0  | 0 | 0   | 0  | 0  | 0   | 0  |
| 0  | 0 | 0   | 0  | 0  | 0   | 0  |
| 0  | 0 | 0   | 0  | 0  | 0   | 0  |
| 1  | 0 | 0   | 0  | 0  | 0   | 0  |
| 0  | 0 | 0   | 0  | 0  | 0   | 0  |
| 0  | 0 | 3   | 0  | 0  | 2   | 0  |
| 0  | 0 | 0   | 0  | 0  | 0   | 0  |
| 0  | 0 | 0   | 0  | 0  | 0   | 0  |
| 2  | 0 | 1   | 0  | 3  | 2   | 0  |
| 0  | 0 | 0   | 0  | 0  | 0   | 0  |
| 0  | 0 | 0   | 0  | 0  | 0   | 0  |
| 0  | 0 | 614 | 8  | 0  | 0   | 0  |
| 0  | 0 | 5   | 0  | 0  | 1   | 0  |
| 0  | 0 | 3   | 0  | 0  | 0   | 0  |
| 11 | 1 | 0   | 0  | 51 | 29  | 0  |
| 0  | 0 | 8   | 44 | 0  | 4   | 0  |
| 0  | 5 | 4   | 0  | 0  | 3   | 2  |
| 0  | 0 | 0   | 0  | 0  | 15  | 1  |
| 0  | 1 | 0   | 5  | 0  | 0   | 0  |
| 0  | 0 | 0   | 0  | 0  | 0   | 0  |
| 0  | 0 | 0   | 0  | 0  | 0   | 0  |
| 0  | 0 | 1   | 0  | 0  | 0   | 0  |
| 0  | 0 | 0   | 0  | 0  | 0   | 0  |
| 0  | 0 | 7   | 0  | 0  | 2   | 0  |
| 0  | 0 | 1   | 0  | 0  | 0   | 0  |
| 0  | 0 | 0   | 0  | 0  | 0   | 25 |
| 0  | 0 | 0   | 0  | 0  | 0   | 0  |
| 0  | 0 | 0   | 0  | 0  | 0   | 0  |
| 0  | 0 | 2   | 0  | 0  | 0   | 0  |
| 0  | 0 | 0   | 0  | 0  | 0   | 0  |
| 0  | 0 | 5   | 4  | 0  | 0   | 0  |
| 0  | 0 | 2   | 0  | 0  | 0   | 0  |
| 0  | 0 | 0   | 0  | 2  | 106 | 0  |
| 0  | 0 | 0   | 0  | 0  | 3   | 0  |
| 0  | 0 | 0   | 0  | 0  | 0   | 0  |
| 0  | 0 | 2   | 0  | 0  | 0   | 0  |
| 0  | 0 | 0   | 0  | 0  | 0   | 0  |

|     |     |     |     |    |    |    |
|-----|-----|-----|-----|----|----|----|
| 0   | 0   | 0   | 0   | 0  | 1  | 0  |
| 0   | 0   | 0   | 0   | 0  | 0  | 0  |
| 0   | 0   | 316 | 0   | 0  | 0  | 10 |
| 0   | 0   | 0   | 46  | 0  | 0  | 0  |
| 0   | 0   | 0   | 0   | 0  | 0  | 0  |
| 0   | 0   | 0   | 0   | 0  | 0  | 0  |
| 0   | 0   | 0   | 0   | 0  | 0  | 0  |
| 0   | 0   | 0   | 0   | 0  | 0  | 0  |
| 0   | 0   | 0   | 0   | 0  | 0  | 0  |
| 0   | 0   | 0   | 0   | 0  | 0  | 28 |
| 0   | 1   | 9   | 0   | 0  | 2  | 3  |
| 0   | 0   | 6   | 0   | 0  | 3  | 0  |
| 33  | 5   | 20  | 47  | 0  | 32 | 11 |
| 0   | 0   | 0   | 0   | 0  | 0  | 0  |
| 0   | 2   | 111 | 0   | 0  | 97 | 0  |
| 0   | 0   | 0   | 0   | 0  | 0  | 0  |
| 0   | 0   | 16  | 0   | 0  | 8  | 0  |
| 0   | 0   | 10  | 0   | 0  | 5  | 0  |
| 6   | 16  | 0   | 0   | 5  | 0  | 18 |
| 14  | 2   | 4   | 27  | 1  | 3  | 2  |
| 1   | 2   | 0   | 2   | 0  | 0  | 1  |
| 0   | 0   | 0   | 0   | 0  | 0  | 0  |
| 0   | 0   | 0   | 0   | 0  | 0  | 0  |
| 0   | 0   | 14  | 0   | 0  | 0  | 0  |
| 0   | 0   | 0   | 0   | 0  | 0  | 0  |
| 0   | 0   | 0   | 0   | 0  | 0  | 0  |
| 0   | 0   | 0   | 0   | 0  | 0  | 0  |
| 0   | 0   | 0   | 0   | 0  | 0  | 0  |
| 0   | 0   | 0   | 0   | 0  | 0  | 0  |
| 0   | 0   | 0   | 0   | 0  | 0  | 0  |
| 0   | 0   | 0   | 0   | 1  | 1  | 0  |
| 0   | 0   | 0   | 0   | 0  | 0  | 1  |
| 8   | 2   | 1   | 0   | 0  | 6  | 3  |
| 0   | 0   | 0   | 0   | 0  | 0  | 8  |
| 0   | 0   | 19  | 0   | 0  | 0  | 0  |
| 0   | 0   | 4   | 0   | 0  | 0  | 0  |
| 0   | 0   | 0   | 0   | 0  | 0  | 0  |
| 0   | 0   | 0   | 0   | 0  | 0  | 0  |
| 0   | 0   | 0   | 0   | 0  | 0  | 0  |
| 0   | 0   | 0   | 0   | 0  | 0  | 0  |
| 13  | 0   | 0   | 0   | 0  | 0  | 0  |
| 0   | 0   | 0   | 0   | 0  | 0  | 0  |
| 0   | 0   | 0   | 0   | 0  | 0  | 0  |
| 631 | 249 | 76  | 504 | 0  | 7  | 85 |
| 3   | 53  | 32  | 10  | 1  | 3  | 0  |
| 18  | 64  | 100 | 3   | 12 | 4  | 0  |
| 0   | 0   | 0   | 0   | 0  | 0  | 0  |
| 0   | 1   | 22  | 0   | 0  | 0  | 0  |
| 7   | 50  | 62  | 0   | 1  | 1  | 0  |

|    |     |    |    |    |    |     |
|----|-----|----|----|----|----|-----|
| 0  | 0   | 0  | 0  | 0  | 0  | 0   |
| 0  | 0   | 0  | 0  | 0  | 0  | 6   |
| 0  | 0   | 0  | 0  | 0  | 0  | 0   |
| 0  | 0   | 0  | 0  | 0  | 0  | 0   |
| 0  | 0   | 6  | 0  | 0  | 0  | 0   |
| 0  | 0   | 0  | 0  | 0  | 0  | 0   |
| 0  | 0   | 0  | 0  | 0  | 0  | 0   |
| 0  | 0   | 0  | 3  | 0  | 0  | 0   |
| 0  | 0   | 0  | 0  | 0  | 0  | 8   |
| 0  | 0   | 0  | 0  | 0  | 0  | 0   |
| 1  | 0   | 17 | 0  | 0  | 0  | 0   |
| 0  | 0   | 0  | 0  | 0  | 0  | 0   |
| 0  | 0   | 0  | 0  | 0  | 0  | 11  |
| 0  | 0   | 0  | 0  | 0  | 0  | 1   |
| 0  | 0   | 1  | 0  | 0  | 0  | 0   |
| 0  | 0   | 0  | 0  | 0  | 0  | 0   |
| 0  | 0   | 0  | 0  | 0  | 0  | 0   |
| 0  | 0   | 0  | 0  | 0  | 0  | 0   |
| 0  | 0   | 0  | 0  | 0  | 0  | 0   |
| 0  | 196 | 10 | 0  | 0  | 1  | 10  |
| 0  | 9   | 6  | 0  | 0  | 0  | 0   |
| 0  | 0   | 13 | 0  | 0  | 0  | 0   |
| 0  | 0   | 0  | 0  | 0  | 0  | 0   |
| 13 | 10  | 29 | 5  | 12 | 63 | 599 |
| 0  | 0   | 1  | 0  | 0  | 0  | 3   |
| 0  | 0   | 0  | 0  | 0  | 0  | 0   |
| 0  | 0   | 0  | 0  | 0  | 0  | 1   |
| 0  | 1   | 1  | 0  | 0  | 0  | 0   |
| 0  | 0   | 0  | 0  | 0  | 0  | 0   |
| 0  | 0   | 0  | 0  | 0  | 2  | 0   |
| 0  | 0   | 0  | 0  | 0  | 0  | 0   |
| 0  | 0   | 0  | 0  | 0  | 0  | 0   |
| 0  | 0   | 0  | 0  | 0  | 0  | 0   |
| 0  | 0   | 0  | 0  | 0  | 0  | 0   |
| 0  | 0   | 0  | 0  | 0  | 0  | 0   |
| 0  | 0   | 0  | 0  | 0  | 0  | 0   |
| 0  | 0   | 0  | 0  | 0  | 0  | 0   |
| 0  | 0   | 0  | 0  | 0  | 0  | 0   |
| 0  | 0   | 0  | 0  | 0  | 0  | 0   |
| 6  | 21  | 1  | 3  | 0  | 18 | 104 |
| 0  | 1   | 0  | 0  | 0  | 0  | 2   |
| 0  | 2   | 2  | 25 | 0  | 0  | 19  |
| 0  | 0   | 0  | 0  | 0  | 0  | 4   |
| 0  | 2   | 1  | 0  | 0  | 0  | 0   |
| 0  | 3   | 54 | 0  | 0  | 12 | 0   |
| 0  | 0   | 0  | 0  | 0  | 0  | 0   |
| 0  | 0   | 0  | 0  | 0  | 0  | 0   |
| 0  | 0   | 0  | 0  | 0  | 0  | 1   |
| 0  | 0   | 0  | 0  | 0  | 0  | 0   |
| 0  | 0   | 12 | 0  | 0  | 0  | 0   |
| 0  | 0   | 12 | 0  | 0  | 0  | 0   |





|      |      |      |      |     |      |      |
|------|------|------|------|-----|------|------|
| 0    | 0    | 7    | 0    | 0   | 0    | 0    |
| 0    | 0    | 1    | 0    | 0   | 0    | 0    |
| 0    | 0    | 0    | 0    | 0   | 0    | 0    |
| 8    | 77   | 18   | 5    | 0   | 0    | 1    |
| 0    | 0    | 0    | 0    | 0   | 7388 | 0    |
| 0    | 0    | 0    | 0    | 0   | 8    | 0    |
| 109  | 97   | 253  | 259  | 13  | 42   | 430  |
| 0    | 0    | 0    | 0    | 0   | 0    | 0    |
| 0    | 0    | 0    | 0    | 0   | 0    | 3    |
| 0    | 0    | 0    | 0    | 0   | 0    | 0    |
| 0    | 0    | 0    | 0    | 0   | 0    | 0    |
| 6130 | 2382 | 3481 | 7422 | 451 | 1051 | 4091 |
| 2    | 0    | 574  | 1    | 0   | 0    | 250  |
| 4    | 0    | 391  | 0    | 0   | 36   | 619  |
| 8    | 2    | 10   | 4    | 0   | 0    | 122  |
| 108  | 85   | 88   | 174  | 1   | 15   | 9    |
| 68   | 13   | 93   | 38   | 4   | 23   | 442  |
| 59   | 15   | 58   | 99   | 1   | 84   | 20   |
| 473  | 385  | 18   | 531  | 80  | 115  | 54   |
| 0    | 1    | 121  | 1    | 0   | 0    | 0    |
| 0    | 0    | 4    | 1    | 0   | 0    | 0    |
| 0    | 0    | 2    | 1    | 0   | 121  | 1    |
| 0    | 0    | 0    | 0    | 0   | 0    | 0    |
| 0    | 0    | 0    | 0    | 0   | 0    | 0    |
| 0    | 0    | 0    | 0    | 0   | 0    | 0    |
| 0    | 0    | 0    | 0    | 0   | 0    | 0    |
| 0    | 0    | 0    | 0    | 0   | 0    | 0    |
| 0    | 0    | 10   | 0    | 0   | 0    | 0    |
| 0    | 5    | 254  | 0    | 9   | 36   | 0    |
| 0    | 0    | 16   | 0    | 0   | 0    | 1    |
| 0    | 0    | 2    | 0    | 0   | 0    | 0    |
| 0    | 15   | 7    | 0    | 0   | 0    | 0    |
| 0    | 0    | 0    | 0    | 0   | 0    | 0    |
| 60   | 6    | 3    | 29   | 0   | 0    | 0    |
| 0    | 0    | 0    | 0    | 0   | 0    | 0    |
| 0    | 1    | 0    | 0    | 26  | 42   | 0    |
| 163  | 85   | 51   | 125  | 7   | 14   | 81   |
| 0    | 0    | 0    | 0    | 0   | 0    | 0    |
| 0    | 0    | 2    | 0    | 0   | 0    | 0    |
| 15   | 2    | 15   | 0    | 0   | 0    | 0    |
| 0    | 0    | 0    | 0    | 0   | 0    | 0    |
| 0    | 0    | 0    | 0    | 0   | 0    | 11   |
| 0    | 9    | 10   | 0    | 2   | 4    | 7    |
| 2    | 0    | 0    | 0    | 0   | 0    | 0    |
| 0    | 0    | 0    | 0    | 0   | 0    | 0    |
| 22   | 11   | 4    | 0    | 0   | 0    | 0    |
| 0    | 0    | 6    | 0    | 0   | 0    | 1    |
| 1    | 0    | 0    | 0    | 0   | 0    | 0    |

|    |    |    |    |   |   |   |
|----|----|----|----|---|---|---|
| 0  | 0  | 0  | 1  | 0 | 0 | 0 |
| 6  | 0  | 1  | 0  | 0 | 0 | 5 |
| 0  | 0  | 0  | 0  | 0 | 0 | 0 |
| 0  | 0  | 0  | 0  | 3 | 0 | 0 |
| 0  | 0  | 0  | 0  | 0 | 3 | 0 |
| 0  | 0  | 0  | 0  | 0 | 0 | 0 |
| 0  | 0  | 12 | 0  | 0 | 0 | 0 |
| 0  | 0  | 0  | 0  | 0 | 0 | 6 |
| 0  | 0  | 0  | 0  | 0 | 2 | 0 |
| 0  | 0  | 4  | 0  | 0 | 0 | 0 |
| 0  | 0  | 0  | 0  | 0 | 0 | 0 |
| 0  | 0  | 20 | 0  | 0 | 0 | 0 |
| 0  | 0  | 44 | 0  | 0 | 0 | 0 |
| 0  | 0  | 11 | 2  | 0 | 0 | 0 |
| 1  | 0  | 0  | 0  | 0 | 0 | 0 |
| 0  | 0  | 0  | 0  | 0 | 0 | 0 |
| 0  | 0  | 0  | 0  | 0 | 0 | 0 |
| 0  | 0  | 1  | 0  | 0 | 0 | 0 |
| 19 | 25 | 1  | 46 | 4 | 4 | 0 |
| 0  | 0  | 0  | 0  | 0 | 0 | 0 |
| 0  | 0  | 0  | 0  | 0 | 0 | 0 |
| 42 | 9  | 10 | 6  | 4 | 3 | 5 |
| 0  | 0  | 0  | 0  | 0 | 0 | 0 |
| 0  | 0  | 0  | 0  | 0 | 0 | 0 |
| 0  | 0  | 0  | 0  | 0 | 0 | 0 |
| 0  | 1  | 0  | 1  | 0 | 0 | 3 |
| 0  | 0  | 0  | 0  | 0 | 0 | 0 |
| 0  | 0  | 0  | 0  | 0 | 0 | 0 |
| 0  | 0  | 0  | 0  | 0 | 0 | 0 |
| 0  | 0  | 0  | 0  | 0 | 0 | 0 |
| 0  | 0  | 0  | 0  | 0 | 0 | 0 |
| 5  | 1  | 3  | 5  | 0 | 0 | 2 |
| 1  | 0  | 1  | 2  | 0 | 1 | 5 |
| 15 | 1  | 1  | 10 | 0 | 1 | 6 |
| 0  | 0  | 0  | 0  | 0 | 0 | 0 |
| 0  | 0  | 0  | 0  | 0 | 0 | 0 |
| 2  | 0  | 9  | 0  | 0 | 1 | 9 |
| 0  | 0  | 0  | 0  | 0 | 0 | 0 |
| 0  | 0  | 1  | 0  | 0 | 0 | 0 |
| 0  | 6  | 2  | 2  | 3 | 0 | 7 |
| 0  | 0  | 0  | 0  | 0 | 0 | 0 |
| 0  | 0  | 2  | 0  | 0 | 0 | 0 |
| 0  | 0  | 0  | 0  | 0 | 0 | 0 |
| 0  | 0  | 2  | 0  | 0 | 2 | 0 |
| 0  | 0  | 0  | 0  | 0 | 0 | 0 |
| 0  | 0  | 3  | 0  | 0 | 0 | 0 |
| 0  | 0  | 0  | 0  | 0 | 0 | 0 |
| 0  | 0  | 0  | 0  | 0 | 0 | 0 |



|    |    |    |    |   |     |     |
|----|----|----|----|---|-----|-----|
| 48 | 0  | 1  | 25 | 0 | 18  | 2   |
| 1  | 0  | 72 | 1  | 0 | 0   | 0   |
| 0  | 0  | 15 | 1  | 0 | 0   | 0   |
| 1  | 9  | 7  | 3  | 1 | 5   | 3   |
| 0  | 0  | 3  | 0  | 0 | 0   | 0   |
| 0  | 0  | 0  | 0  | 0 | 0   | 0   |
| 98 | 70 | 47 | 85 | 0 | 0   | 132 |
| 0  | 0  | 40 | 0  | 0 | 0   | 0   |
| 32 | 4  | 70 | 20 | 0 | 43  | 32  |
| 4  | 1  | 71 | 0  | 4 | 3   | 1   |
| 0  | 0  | 4  | 0  | 0 | 2   | 0   |
| 0  | 0  | 51 | 0  | 0 | 3   | 0   |
| 1  | 0  | 0  | 0  | 2 | 0   | 0   |
| 0  | 0  | 0  | 0  | 0 | 0   | 0   |
| 0  | 0  | 0  | 0  | 0 | 0   | 0   |
| 0  | 0  | 0  | 0  | 0 | 0   | 0   |
| 0  | 0  | 3  | 0  | 0 | 0   | 0   |
| 0  | 0  | 0  | 0  | 0 | 0   | 0   |
| 3  | 0  | 74 | 3  | 8 | 128 | 134 |
| 0  | 1  | 34 | 0  | 0 | 6   | 0   |
| 0  | 0  | 0  | 0  | 0 | 0   | 0   |
| 0  | 0  | 0  | 0  | 0 | 0   | 0   |
| 0  | 0  | 10 | 0  | 0 | 0   | 0   |
| 0  | 0  | 0  | 0  | 0 | 0   | 0   |
| 0  | 0  | 0  | 0  | 0 | 0   | 0   |
| 0  | 0  | 0  | 0  | 0 | 0   | 0   |
| 0  | 8  | 7  | 24 | 0 | 0   | 2   |
| 0  | 0  | 0  | 0  | 0 | 0   | 0   |
| 0  | 0  | 0  | 0  | 0 | 0   | 0   |
| 1  | 0  | 5  | 1  | 0 | 0   | 0   |
| 0  | 0  | 0  | 0  | 1 | 0   | 0   |
| 0  | 0  | 1  | 0  | 0 | 0   | 0   |
| 0  | 0  | 0  | 0  | 0 | 0   | 0   |
| 0  | 0  | 0  | 1  | 0 | 0   | 0   |
| 0  | 0  | 0  | 0  | 0 | 0   | 0   |
| 0  | 0  | 0  | 0  | 0 | 0   | 0   |
| 0  | 0  | 0  | 0  | 0 | 0   | 0   |
| 0  | 0  | 0  | 0  | 0 | 0   | 0   |
| 0  | 0  | 0  | 0  | 0 | 0   | 0   |
| 0  | 0  | 0  | 0  | 0 | 0   | 0   |
| 0  | 0  | 0  | 0  | 0 | 0   | 1   |
| 0  | 0  | 0  | 0  | 0 | 0   | 3   |
| 0  | 0  | 0  | 0  | 0 | 0   | 0   |
| 0  | 0  | 22 | 0  | 0 | 2   | 0   |
| 0  | 5  | 10 | 43 | 0 | 5   | 0   |
| 0  | 0  | 0  | 0  | 0 | 0   | 0   |
| 0  | 4  | 2  | 0  | 1 | 0   | 0   |
| 0  | 0  | 0  | 0  | 0 | 0   | 0   |
| 0  | 0  | 0  | 0  | 0 | 0   | 0   |











|      |     |     |     |     |     |     |
|------|-----|-----|-----|-----|-----|-----|
| 0    | 0   | 0   | 0   | 0   | 0   | 0   |
| 163  | 329 | 354 | 355 | 169 | 213 | 107 |
| 43   | 49  | 14  | 64  | 4   | 13  | 36  |
| 15   | 18  | 3   | 15  | 26  | 19  | 55  |
| 15   | 21  | 7   | 66  | 0   | 0   | 1   |
| 0    | 0   | 0   | 0   | 0   | 0   | 0   |
| 6    | 6   | 0   | 3   | 2   | 0   | 0   |
| 10   | 6   | 4   | 1   | 0   | 0   | 0   |
| 1    | 11  | 2   | 0   | 11  | 1   | 0   |
| 0    | 2   | 23  | 0   | 0   | 1   | 12  |
| 0    | 0   | 2   | 0   | 0   | 0   | 0   |
| 0    | 0   | 26  | 0   | 0   | 2   | 0   |
| 4    | 45  | 1   | 25  | 3   | 1   | 0   |
| 0    | 2   | 4   | 0   | 0   | 0   | 0   |
| 9    | 3   | 2   | 1   | 0   | 0   | 0   |
| 0    | 0   | 45  | 0   | 0   | 0   | 0   |
| 0    | 0   | 0   | 0   | 0   | 0   | 0   |
| 0    | 0   | 5   | 0   | 0   | 0   | 0   |
| 0    | 5   | 2   | 0   | 0   | 0   | 0   |
| 0    | 0   | 0   | 0   | 0   | 0   | 1   |
| 1    | 4   | 4   | 3   | 15  | 9   | 2   |
| 0    | 0   | 0   | 0   | 0   | 0   | 0   |
| 1    | 0   | 0   | 0   | 0   | 1   | 0   |
| 9    | 0   | 0   | 0   | 0   | 0   | 0   |
| 0    | 0   | 0   | 0   | 0   | 0   | 0   |
| 0    | 0   | 0   | 0   | 0   | 0   | 0   |
| 0    | 0   | 0   | 0   | 0   | 0   | 0   |
| 0    | 0   | 0   | 0   | 0   | 0   | 0   |
| 0    | 0   | 0   | 0   | 0   | 0   | 0   |
| 0    | 0   | 0   | 0   | 0   | 0   | 0   |
| 0    | 0   | 0   | 0   | 0   | 0   | 0   |
| 0    | 0   | 0   | 0   | 0   | 0   | 0   |
| 0    | 0   | 0   | 0   | 0   | 0   | 0   |
| 0    | 0   | 0   | 0   | 0   | 0   | 0   |
| 0    | 0   | 0   | 0   | 0   | 0   | 0   |
| 0    | 0   | 0   | 0   | 0   | 0   | 0   |
| 4    | 0   | 87  | 12  | 0   | 3   | 0   |
| 73   | 33  | 100 | 26  | 0   | 17  | 16  |
| 1084 | 196 | 133 | 529 | 36  | 233 | 87  |
| 62   | 2   | 131 | 81  | 0   | 10  | 9   |
| 12   | 0   | 1   | 0   | 1   | 0   | 44  |
| 0    | 0   | 0   | 6   | 0   | 0   | 43  |
| 42   | 3   | 116 | 12  | 15  | 390 | 5   |
| 53   | 21  | 363 | 49  | 7   | 138 | 2   |
| 5    | 8   | 15  | 6   | 19  | 6   | 0   |
| 190  | 35  | 7   | 75  | 4   | 0   | 20  |
| 0    | 0   | 0   | 0   | 9   | 3   | 0   |
| 0    | 1   | 43  | 0   | 2   | 9   | 0   |
| 0    | 0   | 0   | 0   | 0   | 0   | 0   |
| 0    | 0   | 0   | 0   | 0   | 2   | 5   |
| 0    | 0   | 12  | 0   | 0   | 0   | 0   |
| 0    | 0   | 0   | 0   | 0   | 1   | 0   |



|      |      |       |     |      |      |      |
|------|------|-------|-----|------|------|------|
| 1143 | 2940 | 11102 | 673 | 4254 | 4201 | 4276 |
| 5    | 23   | 189   | 16  | 17   | 12   | 41   |
| 0    | 0    | 0     | 0   | 0    | 0    | 0    |
| 0    | 0    | 0     | 0   | 0    | 0    | 0    |
| 0    | 0    | 2     | 0   | 0    | 0    | 0    |
| 0    | 1    | 8     | 0   | 3    | 2    | 0    |
| 0    | 0    | 0     | 0   | 0    | 0    | 0    |
| 0    | 0    | 3     | 0   | 0    | 1    | 0    |
| 0    | 0    | 1     | 0   | 0    | 0    | 0    |
| 0    | 0    | 0     | 0   | 0    | 2    | 0    |
| 0    | 0    | 0     | 0   | 0    | 0    | 0    |
| 0    | 0    | 0     | 0   | 2    | 5    | 0    |
| 17   | 29   | 274   | 3   | 149  | 43   | 435  |
| 1    | 0    | 212   | 0   | 0    | 13   | 0    |
| 0    | 0    | 0     | 0   | 0    | 0    | 144  |
| 0    | 0    | 0     | 0   | 0    | 0    | 0    |
| 0    | 0    | 0     | 0   | 0    | 0    | 0    |
| 0    | 0    | 0     | 0   | 0    | 0    | 0    |
| 2    | 0    | 0     | 0   | 0    | 0    | 0    |
| 115  | 288  | 172   | 33  | 221  | 16   | 2    |
| 0    | 0    | 0     | 0   | 0    | 0    | 0    |
| 0    | 0    | 0     | 0   | 0    | 0    | 0    |
| 1    | 0    | 0     | 0   | 0    | 0    | 0    |
| 0    | 0    | 0     | 0   | 0    | 0    | 0    |
| 12   | 57   | 555   | 41  | 10   | 65   | 114  |
| 0    | 0    | 0     | 0   | 0    | 0    | 9    |
| 0    | 0    | 0     | 0   | 0    | 0    | 0    |
| 641  | 10   | 6     | 4   | 96   | 12   | 3    |
| 0    | 2    | 1     | 116 | 5    | 4    | 77   |
| 193  | 347  | 208   | 525 | 81   | 33   | 124  |
| 232  | 6    | 59    | 137 | 2    | 9    | 78   |
| 0    | 0    | 67    | 0   | 0    | 126  | 137  |
| 15   | 52   | 19    | 189 | 39   | 7    | 24   |
| 3    | 0    | 0     | 1   | 17   | 23   | 0    |
| 65   | 48   | 19    | 259 | 1    | 0    | 0    |
| 5    | 8    | 2     | 2   | 3    | 0    | 1    |
| 3    | 12   | 43    | 9   | 0    | 1    | 1    |
| 0    | 1    | 5     | 0   | 0    | 0    | 0    |
| 0    | 0    | 0     | 0   | 1    | 0    | 0    |
| 0    | 0    | 0     | 0   | 0    | 0    | 0    |
| 0    | 0    | 0     | 0   | 0    | 0    | 0    |
| 0    | 0    | 0     | 0   | 0    | 0    | 0    |
| 0    | 0    | 0     | 0   | 0    | 0    | 0    |
| 0    | 0    | 0     | 0   | 0    | 0    | 0    |
| 56   | 0    | 0     | 3   | 7    | 1    | 283  |
| 3    | 10   | 120   | 20  | 15   | 4    | 115  |
| 0    | 26   | 53    | 27  | 2    | 63   | 0    |
| 0    | 0    | 0     | 0   | 0    | 0    | 2    |
| 0    | 0    | 0     | 0   | 0    | 0    | 110  |

|      |      |       |      |      |      |      |
|------|------|-------|------|------|------|------|
| 0    | 0    | 0     | 0    | 0    | 0    | 0    |
| 3    | 0    | 0     | 0    | 0    | 0    | 1    |
| 1    | 0    | 0     | 0    | 0    | 0    | 0    |
| 4    | 0    | 0     | 0    | 1    | 0    | 0    |
| 0    | 0    | 0     | 0    | 0    | 0    | 0    |
| 0    | 0    | 0     | 0    | 0    | 0    | 0    |
| 0    | 0    | 0     | 0    | 0    | 0    | 0    |
| 0    | 0    | 0     | 0    | 0    | 0    | 0    |
| 0    | 0    | 0     | 0    | 38   | 73   | 0    |
| 0    | 0    | 0     | 0    | 36   | 3    | 0    |
| 2    | 3    | 310   | 5    | 8    | 95   | 1    |
| 0    | 0    | 0     | 0    | 0    | 0    | 0    |
| 3    | 14   | 15    | 7    | 2    | 0    | 0    |
| 0    | 0    | 0     | 0    | 0    | 3    | 0    |
| 0    | 0    | 0     | 0    | 0    | 0    | 0    |
| 0    | 0    | 0     | 0    | 0    | 0    | 0    |
| 3381 | 7570 | 10214 | 3266 | 1086 | 192  | 313  |
| 4    | 169  | 5192  | 32   | 5    | 122  | 1512 |
| 5    | 11   | 28    | 6    | 0    | 1    | 2578 |
| 0    | 0    | 2     | 0    | 0    | 0    | 6    |
| 0    | 0    | 0     | 0    | 0    | 0    | 1    |
| 5    | 8    | 10    | 0    | 1    | 0    | 0    |
| 0    | 0    | 0     | 0    | 0    | 0    | 0    |
| 0    | 1    | 1     | 0    | 0    | 0    | 0    |
| 0    | 0    | 0     | 0    | 0    | 0    | 2    |
| 25   | 10   | 29    | 2    | 2    | 0    | 0    |
| 5    | 3    | 5     | 3    | 0    | 0    | 2    |
| 5    | 4    | 3     | 1    | 0    | 0    | 0    |
| 0    | 0    | 0     | 0    | 0    | 0    | 0    |
| 196  | 268  | 421   | 65   | 19   | 0    | 0    |
| 66   | 66   | 174   | 80   | 48   | 11   | 6    |
| 39   | 43   | 155   | 20   | 273  | 21   | 2    |
| 4    | 60   | 778   | 8    | 71   | 44   | 0    |
| 19   | 33   | 21    | 51   | 13   | 13   | 59   |
| 0    | 0    | 0     | 0    | 0    | 0    | 0    |
| 0    | 0    | 0     | 0    | 0    | 0    | 0    |
| 0    | 0    | 0     | 0    | 0    | 0    | 0    |
| 1    | 0    | 0     | 0    | 0    | 0    | 1    |
| 0    | 0    | 0     | 0    | 0    | 0    | 0    |
| 379  | 436  | 5426  | 542  | 476  | 6429 | 374  |
| 16   | 36   | 1696  | 74   | 107  | 854  | 4    |
| 4    | 10   | 1518  | 13   | 17   | 103  | 0    |
| 0    | 0    | 18    | 0    | 0    | 267  | 0    |
| 10   | 30   | 546   | 12   | 74   | 277  | 0    |
| 0    | 0    | 0     | 0    | 0    | 0    | 0    |
| 0    | 0    | 0     | 0    | 0    | 0    | 0    |
| 0    | 0    | 63    | 0    | 2    | 9    | 0    |
| 0    | 0    | 14    | 1    | 0    | 1    | 0    |
| 0    | 0    | 2     | 0    | 0    | 2    | 0    |

|      |      |      |     |      |      |     |
|------|------|------|-----|------|------|-----|
| 0    | 0    | 0    | 0   | 0    | 0    | 0   |
| 0    | 0    | 0    | 0   | 0    | 0    | 0   |
| 0    | 1    | 0    | 0   | 0    | 0    | 0   |
| 0    | 0    | 0    | 0   | 0    | 0    | 0   |
| 0    | 0    | 1    | 0   | 0    | 2    | 0   |
| 0    | 0    | 0    | 0   | 0    | 0    | 0   |
| 0    | 0    | 6    | 0   | 2    | 2    | 0   |
| 0    | 0    | 6    | 0   | 2    | 13   | 0   |
| 0    | 0    | 0    | 0   | 0    | 0    | 0   |
| 0    | 0    | 1    | 0   | 1    | 4    | 0   |
| 0    | 0    | 0    | 0   | 0    | 2    | 0   |
| 191  | 42   | 143  | 66  | 0    | 0    | 0   |
| 0    | 0    | 0    | 0   | 0    | 0    | 0   |
| 0    | 0    | 0    | 0   | 0    | 0    | 0   |
| 17   | 57   | 32   | 100 | 53   | 36   | 1   |
| 362  | 8    | 3    | 10  | 0    | 0    | 0   |
| 0    | 0    | 21   | 0   | 0    | 0    | 0   |
| 0    | 0    | 0    | 0   | 0    | 0    | 1   |
| 0    | 3    | 5    | 1   | 1    | 1    | 0   |
| 2    | 0    | 0    | 6   | 0    | 0    | 64  |
| 0    | 0    | 0    | 0   | 1    | 0    | 0   |
| 0    | 0    | 0    | 0   | 0    | 0    | 0   |
| 0    | 0    | 2    | 0   | 0    | 0    | 0   |
| 0    | 0    | 0    | 0   | 0    | 0    | 0   |
| 7    | 0    | 0    | 0   | 0    | 0    | 0   |
| 1409 | 3532 | 5081 | 551 | 772  | 146  | 416 |
| 6    | 68   | 284  | 9   | 1665 | 213  | 0   |
| 3    | 10   | 15   | 0   | 0    | 61   | 0   |
| 0    | 0    | 0    | 0   | 0    | 0    | 0   |
| 0    | 3    | 11   | 1   | 1    | 0    | 0   |
| 0    | 5    | 559  | 33  | 74   | 1446 | 0   |
| 0    | 13   | 4    | 4   | 1    | 0    | 0   |
| 0    | 0    | 0    | 0   | 0    | 0    | 0   |
| 0    | 0    | 0    | 0   | 0    | 2    | 0   |
| 0    | 0    | 0    | 0   | 0    | 0    | 0   |
| 0    | 0    | 0    | 0   | 0    | 0    | 0   |
| 0    | 0    | 0    | 0   | 0    | 0    | 0   |
| 0    | 0    | 0    | 0   | 0    | 3    | 0   |
| 0    | 0    | 0    | 0   | 0    | 0    | 0   |
| 0    | 0    | 0    | 0   | 0    | 0    | 0   |
| 0    | 0    | 0    | 0   | 0    | 4    | 0   |
| 0    | 0    | 0    | 0   | 0    | 0    | 0   |
| 0    | 0    | 59   | 0   | 0    | 0    | 0   |
| 6    | 5    | 1    | 9   | 0    | 0    | 0   |
| 0    | 0    | 0    | 0   | 0    | 0    | 14  |
| 0    | 0    | 0    | 0   | 0    | 0    | 0   |
| 0    | 0    | 0    | 0   | 0    | 0    | 0   |
| 0    | 0    | 0    | 0   | 0    | 0    | 0   |

|     |     |      |     |    |      |      |
|-----|-----|------|-----|----|------|------|
| 0   | 0   | 0    | 0   | 0  | 0    | 0    |
| 0   | 0   | 0    | 0   | 0  | 0    | 0    |
| 113 | 26  | 3522 | 178 | 21 | 120  | 1766 |
| 329 | 319 | 7    | 205 | 10 | 0    | 23   |
| 76  | 18  | 533  | 89  | 0  | 10   | 254  |
| 2   | 0   | 0    | 1   | 0  | 0    | 0    |
| 48  | 41  | 99   | 30  | 1  | 8    | 153  |
| 4   | 0   | 309  | 21  | 5  | 180  | 15   |
| 0   | 3   | 233  | 15  | 0  | 6    | 10   |
| 201 | 111 | 12   | 77  | 27 | 8    | 13   |
| 0   | 0   | 0    | 0   | 0  | 0    | 1    |
| 0   | 0   | 8    | 0   | 1  | 1720 | 0    |
| 47  | 7   | 65   | 35  | 7  | 46   | 220  |
| 3   | 0   | 0    | 0   | 0  | 0    | 64   |
| 43  | 1   | 52   | 14  | 3  | 6    | 243  |
| 3   | 0   | 46   | 0   | 0  | 19   | 0    |
| 0   | 0   | 3    | 0   | 0  | 0    | 70   |
| 0   | 0   | 3    | 0   | 0  | 0    | 26   |
| 14  | 6   | 52   | 46  | 17 | 510  | 26   |
| 0   | 1   | 42   | 0   | 0  | 0    | 87   |
| 0   | 0   | 5    | 0   | 0  | 0    | 0    |
| 0   | 0   | 0    | 0   | 0  | 0    | 0    |
| 1   | 0   | 83   | 0   | 0  | 3    | 1    |
| 0   | 0   | 10   | 0   | 0  | 0    | 4    |
| 7   | 0   | 4    | 19  | 0  | 10   | 26   |
| 38  | 6   | 69   | 22  | 5  | 9    | 44   |
| 0   | 0   | 22   | 0   | 0  | 12   | 51   |
| 0   | 0   | 0    | 339 | 0  | 0    | 0    |
| 0   | 0   | 0    | 0   | 1  | 6    | 0    |
| 0   | 0   | 11   | 0   | 0  | 0    | 0    |
| 0   | 0   | 0    | 0   | 0  | 0    | 0    |
| 0   | 0   | 56   | 0   | 0  | 0    | 0    |
| 0   | 0   | 0    | 0   | 0  | 0    | 0    |
| 0   | 0   | 0    | 0   | 0  | 0    | 0    |
| 0   | 0   | 18   | 0   | 0  | 0    | 0    |
| 0   | 0   | 1    | 0   | 0  | 0    | 0    |
| 0   | 0   | 17   | 0   | 0  | 20   | 0    |
| 10  | 2   | 0    | 0   | 0  | 0    | 1    |
| 0   | 0   | 0    | 0   | 0  | 0    | 0    |
| 0   | 0   | 4    | 0   | 0  | 0    | 0    |
| 0   | 0   | 0    | 0   | 0  | 0    | 0    |
| 0   | 0   | 0    | 0   | 0  | 0    | 0    |
| 0   | 0   | 3    | 0   | 0  | 2    | 2    |
| 0   | 0   | 0    | 0   | 0  | 0    | 0    |
| 0   | 0   | 0    | 0   | 0  | 0    | 0    |
| 0   | 0   | 0    | 23  | 0  | 0    | 0    |
| 0   | 0   | 0    | 0   | 0  | 0    | 0    |
| 0   | 0   | 0    | 0   | 0  | 0    | 0    |



|      |      |      |      |     |       |      |
|------|------|------|------|-----|-------|------|
| 0    | 0    | 0    | 0    | 0   | 0     | 0    |
| 0    | 0    | 0    | 0    | 0   | 0     | 0    |
| 1    | 1    | 0    | 1    | 0   | 0     | 0    |
| 94   | 70   | 111  | 168  | 10  | 35    | 3    |
| 2    | 0    | 0    | 0    | 11  | 0     | 0    |
| 1    | 2    | 0    | 7    | 0   | 0     | 2    |
| 0    | 0    | 0    | 0    | 0   | 0     | 0    |
| 0    | 0    | 0    | 0    | 0   | 0     | 5    |
| 2275 | 1444 | 1145 | 2460 | 102 | 703   | 213  |
| 2599 | 3398 | 5966 | 2539 | 532 | 60670 | 1382 |
| 9    | 0    | 60   | 15   | 0   | 0     | 11   |
| 0    | 10   | 0    | 4    | 0   | 0     | 19   |
| 403  | 375  | 133  | 826  | 132 | 66    | 110  |
| 88   | 94   | 21   | 135  | 2   | 5     | 7    |
| 0    | 0    | 175  | 5    | 1   | 3405  | 0    |
| 8    | 6    | 16   | 9    | 0   | 62    | 3    |
| 3    | 0    | 0    | 0    | 0   | 0     | 58   |
| 0    | 5    | 9    | 18   | 0   | 7     | 0    |
| 1    | 0    | 0    | 4    | 1   | 5     | 0    |
| 12   | 53   | 56   | 5    | 4   | 90    | 3    |
| 22   | 188  | 128  | 73   | 1   | 15    | 1    |
| 0    | 19   | 32   | 16   | 2   | 41    | 5    |
| 1    | 4    | 8    | 7    | 3   | 94    | 20   |
| 4    | 0    | 7    | 0    | 0   | 0     | 0    |
| 0    | 1    | 5    | 7    | 0   | 0     | 10   |
| 14   | 18   | 36   | 12   | 12  | 61    | 12   |
| 1    | 0    | 17   | 4    | 1   | 6     | 0    |
| 11   | 26   | 20   | 12   | 4   | 498   | 14   |
| 1    | 5    | 21   | 1    | 0   | 773   | 0    |
| 0    | 0    | 0    | 0    | 0   | 0     | 0    |
| 1    | 1    | 7    | 1    | 0   | 0     | 0    |
| 0    | 2    | 0    | 0    | 0   | 0     | 0    |
| 3    | 4    | 8    | 2    | 2   | 33    | 3    |
| 1    | 2    | 5    | 2    | 0   | 22    | 1    |
| 5    | 0    | 0    | 7    | 0   | 0     | 0    |
| 0    | 0    | 0    | 0    | 0   | 0     | 0    |
| 0    | 0    | 1    | 0    | 0   | 3     | 0    |
| 0    | 0    | 8    | 0    | 0   | 50    | 6    |
| 0    | 0    | 29   | 0    | 0   | 0     | 0    |
| 0    | 1    | 0    | 0    | 0   | 18    | 0    |
| 0    | 0    | 0    | 0    | 0   | 0     | 0    |
| 0    | 2    | 0    | 0    | 0   | 0     | 2    |
| 0    | 0    | 0    | 0    | 0   | 0     | 5    |
| 2    | 3    | 0    | 6    | 0   | 0     | 0    |
| 0    | 0    | 0    | 0    | 1   | 67    | 0    |
| 0    | 0    | 0    | 0    | 0   | 0     | 0    |
| 0    | 1    | 0    | 0    | 0   | 7     | 0    |
| 0    | 0    | 0    | 0    | 0   | 0     | 0    |



|    |    |    |   |   |     |    |
|----|----|----|---|---|-----|----|
| 0  | 0  | 0  | 0 | 0 | 0   | 0  |
| 8  | 11 | 42 | 2 | 1 | 149 | 9  |
| 0  | 0  | 0  | 0 | 0 | 0   | 0  |
| 0  | 4  | 0  | 0 | 0 | 0   | 0  |
| 0  | 0  | 0  | 0 | 0 | 0   | 0  |
| 0  | 0  | 4  | 0 | 0 | 19  | 1  |
| 0  | 0  | 0  | 0 | 0 | 0   | 0  |
| 10 | 23 | 9  | 9 | 2 | 281 | 14 |
| 0  | 1  | 0  | 0 | 0 | 0   | 0  |
| 0  | 0  | 0  | 1 | 0 | 0   | 0  |
| 0  | 0  | 1  | 0 | 0 | 3   | 0  |
| 1  | 2  | 2  | 1 | 0 | 21  | 3  |
| 0  | 1  | 0  | 0 | 0 | 0   | 0  |
| 1  | 1  | 1  | 0 | 0 | 3   | 0  |
| 0  | 0  | 0  | 0 | 0 | 0   | 0  |
| 5  | 3  | 4  | 4 | 1 | 40  | 1  |
| 0  | 0  | 0  | 0 | 0 | 0   | 0  |
| 0  | 0  | 0  | 0 | 0 | 0   | 0  |
| 0  | 2  | 1  | 0 | 0 | 32  | 2  |
| 0  | 0  | 0  | 0 | 0 | 3   | 0  |
| 0  | 0  | 0  | 0 | 0 | 0   | 0  |
| 0  | 0  | 0  | 0 | 0 | 0   | 0  |
| 0  | 1  | 3  | 0 | 0 | 0   | 1  |
| 0  | 1  | 11 | 0 | 0 | 38  | 0  |
| 1  | 0  | 0  | 1 | 0 | 0   | 0  |
| 0  | 0  | 0  | 0 | 0 | 0   | 0  |
| 0  | 0  | 0  | 0 | 0 | 0   | 0  |
| 0  | 0  | 0  | 0 | 0 | 0   | 2  |
| 0  | 0  | 0  | 0 | 0 | 0   | 0  |
| 1  | 0  | 1  | 0 | 0 | 0   | 0  |
| 0  | 0  | 0  | 0 | 0 | 7   | 0  |
| 0  | 0  | 2  | 0 | 0 | 3   | 0  |
| 0  | 0  | 0  | 0 | 0 | 1   | 0  |
| 0  | 0  | 0  | 0 | 0 | 0   | 0  |
| 0  | 0  | 0  | 0 | 0 | 0   | 0  |
| 0  | 0  | 0  | 0 | 0 | 0   | 0  |
| 0  | 0  | 0  | 0 | 0 | 0   | 0  |
| 0  | 0  | 0  | 0 | 0 | 0   | 0  |
| 0  | 0  | 0  | 0 | 0 | 0   | 0  |
| 0  | 0  | 0  | 0 | 0 | 0   | 0  |
| 0  | 0  | 0  | 0 | 0 | 0   | 0  |
| 0  | 0  | 0  | 0 | 0 | 0   | 0  |
| 0  | 0  | 0  | 0 | 0 | 0   | 0  |
| 0  | 0  | 1  | 0 | 0 | 9   | 0  |
| 0  | 2  | 1  | 0 | 0 | 14  | 0  |
| 0  | 0  | 0  | 0 | 0 | 5   | 0  |
| 0  | 0  | 0  | 0 | 0 | 7   | 0  |
| 0  | 0  | 0  | 0 | 0 | 8   | 0  |
| 0  | 0  | 0  | 0 | 0 | 0   | 0  |
| 0  | 0  | 0  | 0 | 0 | 0   | 0  |

|      |     |     |     |     |      |     |
|------|-----|-----|-----|-----|------|-----|
| 0    | 0   | 0   | 0   | 0   | 0    | 0   |
| 280  | 792 | 444 | 502 | 172 | 350  | 382 |
| 54   | 97  | 606 | 49  | 24  | 7490 | 72  |
| 88   | 150 | 15  | 145 | 21  | 24   | 108 |
| 3    | 1   | 0   | 0   | 33  | 2    | 22  |
| 10   | 31  | 5   | 45  | 20  | 40   | 9   |
| 39   | 64  | 16  | 29  | 3   | 23   | 14  |
| 3    | 2   | 0   | 5   | 0   | 0    | 0   |
| 3    | 0   | 7   | 0   | 1   | 3    | 1   |
| 31   | 40  | 62  | 30  | 5   | 156  | 4   |
| 1    | 1   | 3   | 0   | 0   | 0    | 0   |
| 0    | 1   | 50  | 0   | 0   | 21   | 1   |
| 1    | 4   | 1   | 0   | 0   | 2    | 0   |
| 5    | 32  | 1   | 7   | 11  | 9    | 0   |
| 0    | 2   | 1   | 0   | 0   | 0    | 0   |
| 0    | 0   | 0   | 0   | 0   | 0    | 0   |
| 14   | 7   | 10  | 12  | 5   | 10   | 0   |
| 0    | 1   | 12  | 1   | 0   | 78   | 2   |
| 0    | 1   | 1   | 0   | 0   | 9    | 0   |
| 1    | 0   | 0   | 1   | 0   | 1    | 0   |
| 0    | 0   | 5   | 0   | 0   | 59   | 0   |
| 1    | 2   | 1   | 2   | 0   | 0    | 0   |
| 1    | 5   | 6   | 0   | 0   | 0    | 2   |
| 0    | 0   | 1   | 0   | 0   | 3    | 0   |
| 0    | 0   | 0   | 0   | 0   | 0    | 0   |
| 1    | 0   | 0   | 0   | 0   | 0    | 0   |
| 0    | 0   | 0   | 0   | 0   | 0    | 0   |
| 0    | 0   | 0   | 0   | 0   | 0    | 0   |
| 0    | 0   | 1   | 0   | 0   | 0    | 0   |
| 0    | 0   | 2   | 0   | 0   | 1    | 1   |
| 0    | 0   | 0   | 0   | 0   | 0    | 0   |
| 0    | 0   | 0   | 0   | 0   | 0    | 0   |
| 0    | 0   | 0   | 0   | 0   | 0    | 0   |
| 0    | 0   | 0   | 0   | 0   | 0    | 0   |
| 0    | 0   | 0   | 0   | 0   | 1    | 0   |
| 0    | 0   | 0   | 0   | 0   | 0    | 0   |
| 3156 | 913 | 29  | 977 | 392 | 90   | 33  |
| 0    | 9   | 9   | 56  | 4   | 23   | 2   |
| 0    | 0   | 0   | 0   | 0   | 0    | 0   |
| 0    | 0   | 0   | 0   | 0   | 0    | 11  |
| 0    | 0   | 0   | 0   | 0   | 0    | 0   |
| 1    | 0   | 0   | 0   | 0   | 0    | 0   |
| 0    | 1   | 0   | 5   | 0   | 0    | 2   |
| 0    | 0   | 0   | 0   | 0   | 0    | 0   |
| 0    | 0   | 0   | 0   | 0   | 0    | 0   |
| 0    | 0   | 0   | 0   | 0   | 0    | 0   |
| 1    | 0   | 0   | 1   | 0   | 0    | 0   |
| 0    | 2   | 0   | 3   | 0   | 0    | 0   |

|     |     |    |     |    |    |     |
|-----|-----|----|-----|----|----|-----|
| 0   | 0   | 0  | 0   | 1  | 0  | 0   |
| 0   | 0   | 0  | 0   | 0  | 0  | 0   |
| 0   | 5   | 1  | 1   | 0  | 0  | 0   |
| 0   | 0   | 0  | 0   | 0  | 0  | 0   |
| 0   | 0   | 0  | 0   | 0  | 0  | 0   |
| 0   | 0   | 0  | 0   | 0  | 0  | 0   |
| 0   | 0   | 0  | 0   | 0  | 0  | 0   |
| 0   | 0   | 1  | 0   | 0  | 0  | 0   |
| 0   | 0   | 0  | 0   | 0  | 0  | 0   |
| 0   | 0   | 0  | 0   | 0  | 0  | 0   |
| 0   | 0   | 0  | 0   | 0  | 0  | 0   |
| 4   | 0   | 0  | 0   | 0  | 0  | 0   |
| 0   | 0   | 0  | 0   | 0  | 0  | 0   |
| 0   | 0   | 0  | 0   | 0  | 0  | 0   |
| 0   | 1   | 0  | 0   | 0  | 0  | 0   |
| 0   | 0   | 0  | 0   | 0  | 0  | 0   |
| 0   | 0   | 0  | 0   | 0  | 0  | 0   |
| 0   | 0   | 0  | 0   | 0  | 0  | 0   |
| 0   | 0   | 6  | 0   | 0  | 3  | 8   |
| 0   | 0   | 0  | 0   | 0  | 0  | 1   |
| 0   | 0   | 0  | 0   | 0  | 0  | 0   |
| 0   | 0   | 0  | 0   | 0  | 0  | 0   |
| 0   | 1   | 58 | 0   | 0  | 0  | 0   |
| 0   | 0   | 9  | 0   | 0  | 0  | 0   |
| 0   | 0   | 0  | 0   | 0  | 0  | 0   |
| 0   | 0   | 0  | 0   | 0  | 0  | 0   |
| 0   | 0   | 0  | 0   | 0  | 0  | 0   |
| 0   | 0   | 0  | 0   | 0  | 0  | 0   |
| 0   | 0   | 0  | 0   | 0  | 0  | 0   |
| 0   | 0   | 0  | 0   | 0  | 0  | 0   |
| 0   | 0   | 0  | 27  | 0  | 0  | 0   |
| 4   | 39  | 17 | 140 | 1  | 4  | 0   |
| 0   | 0   | 0  | 30  | 0  | 3  | 0   |
| 0   | 0   | 0  | 0   | 0  | 0  | 0   |
| 0   | 0   | 0  | 0   | 0  | 0  | 0   |
| 27  | 43  | 7  | 92  | 18 | 10 | 110 |
| 0   | 0   | 0  | 0   | 0  | 0  | 0   |
| 142 | 111 | 18 | 342 | 2  | 2  | 0   |
| 0   | 21  | 8  | 18  | 3  | 5  | 2   |
| 0   | 0   | 0  | 0   | 0  | 0  | 0   |
| 25  | 1   | 1  | 0   | 0  | 0  | 0   |
| 1   | 0   | 0  | 0   | 0  | 0  | 0   |
| 0   | 0   | 0  | 0   | 0  | 0  | 0   |
| 8   | 4   | 2  | 4   | 0  | 0  | 0   |
| 257 | 107 | 5  | 256 | 1  | 0  | 16  |
| 0   | 1   | 0  | 0   | 0  | 0  | 0   |
| 1   | 4   | 1  | 23  | 0  | 14 | 0   |
| 0   | 0   | 0  | 0   | 0  | 3  | 0   |
| 0   | 0   | 0  | 0   | 0  | 0  | 0   |
| 0   | 5   | 1  | 9   | 6  | 10 | 2   |

|     |     |     |     |     |     |     |
|-----|-----|-----|-----|-----|-----|-----|
| 0   | 0   | 0   | 0   | 0   | 0   | 0   |
| 85  | 39  | 6   | 189 | 299 | 27  | 117 |
| 119 | 326 | 59  | 285 | 54  | 86  | 6   |
| 6   | 0   | 0   | 0   | 0   | 0   | 0   |
| 0   | 0   | 7   | 0   | 0   | 0   | 0   |
| 0   | 0   | 0   | 0   | 0   | 0   | 0   |
| 0   | 0   | 0   | 0   | 0   | 0   | 0   |
| 0   | 0   | 0   | 0   | 0   | 0   | 0   |
| 0   | 0   | 0   | 0   | 0   | 0   | 0   |
| 112 | 38  | 4   | 48  | 40  | 17  | 55  |
| 78  | 23  | 23  | 107 | 5   | 188 | 66  |
| 0   | 0   | 470 | 0   | 1   | 7   | 0   |
| 0   | 0   | 0   | 0   | 0   | 1   | 0   |
| 0   | 0   | 70  | 0   | 0   | 0   | 0   |
| 0   | 0   | 0   | 0   | 0   | 0   | 0   |
| 0   | 0   | 0   | 0   | 0   | 0   | 0   |
| 0   | 0   | 0   | 0   | 0   | 0   | 0   |
| 0   | 0   | 0   | 0   | 0   | 6   | 0   |
| 0   | 0   | 0   | 0   | 0   | 0   | 0   |
| 0   | 0   | 0   | 0   | 0   | 0   | 0   |
| 0   | 0   | 0   | 0   | 0   | 0   | 0   |
| 0   | 0   | 6   | 0   | 0   | 0   | 0   |
| 0   | 0   | 0   | 0   | 0   | 0   | 0   |
| 0   | 0   | 0   | 0   | 0   | 0   | 0   |
| 0   | 0   | 0   | 0   | 0   | 0   | 0   |
| 0   | 0   | 0   | 0   | 0   | 0   | 0   |
| 0   | 0   | 4   | 0   | 0   | 0   | 0   |
| 0   | 0   | 0   | 0   | 0   | 0   | 0   |
| 0   | 0   | 0   | 0   | 0   | 0   | 0   |
| 0   | 0   | 0   | 0   | 0   | 0   | 0   |
| 0   | 0   | 0   | 0   | 0   | 0   | 0   |
| 0   | 8   | 0   | 0   | 0   | 5   | 0   |
| 0   | 0   | 0   | 0   | 0   | 0   | 0   |
| 0   | 0   | 0   | 0   | 0   | 0   | 0   |
| 0   | 0   | 4   | 0   | 0   | 0   | 0   |
| 0   | 2   | 0   | 0   | 0   | 0   | 3   |
| 0   | 1   | 1   | 0   | 0   | 1   | 2   |
| 0   | 0   | 0   | 0   | 0   | 0   | 0   |
| 0   | 0   | 0   | 0   | 0   | 0   | 0   |
| 0   | 0   | 0   | 0   | 0   | 0   | 0   |
| 2   | 0   | 28  | 2   | 1   | 6   | 0   |
| 2   | 0   | 1   | 0   | 0   | 1   | 0   |
| 0   | 0   | 0   | 0   | 0   | 0   | 0   |
| 0   | 0   | 0   | 0   | 0   | 0   | 0   |
| 1   | 0   | 0   | 0   | 0   | 0   | 6   |
| 0   | 0   | 2   | 0   | 0   | 2   | 0   |
| 0   | 0   | 0   | 0   | 0   | 0   | 0   |
| 2   | 0   | 0   | 0   | 0   | 0   | 0   |

|   |   |      |    |   |    |   |
|---|---|------|----|---|----|---|
| 1 | 0 | 7    | 0  | 2 | 4  | 1 |
| 0 | 0 | 0    | 0  | 0 | 0  | 1 |
| 0 | 0 | 0    | 0  | 0 | 0  | 0 |
| 0 | 0 | 76   | 0  | 2 | 79 | 0 |
| 0 | 0 | 0    | 0  | 0 | 0  | 0 |
| 0 | 0 | 0    | 0  | 0 | 0  | 0 |
| 2 | 0 | 421  | 1  | 1 | 96 | 7 |
| 0 | 0 | 17   | 0  | 0 | 0  | 0 |
| 0 | 0 | 44   | 0  | 0 | 0  | 0 |
| 0 | 0 | 0    | 0  | 0 | 0  | 0 |
| 0 | 0 | 0    | 0  | 0 | 0  | 0 |
| 0 | 0 | 0    | 0  | 0 | 0  | 0 |
| 0 | 0 | 37   | 0  | 0 | 2  | 1 |
| 0 | 0 | 0    | 0  | 0 | 0  | 0 |
| 1 | 0 | 1433 | 10 | 2 | 47 | 2 |
| 0 | 0 | 3    | 0  | 0 | 0  | 0 |
| 0 | 0 | 0    | 0  | 0 | 0  | 0 |
| 0 | 0 | 0    | 0  | 0 | 0  | 0 |
| 0 | 0 | 4    | 0  | 0 | 0  | 0 |
| 0 | 0 | 0    | 0  | 0 | 0  | 0 |
| 0 | 0 | 0    | 0  | 0 | 0  | 0 |
| 0 | 0 | 0    | 0  | 0 | 0  | 0 |
| 0 | 0 | 0    | 0  | 0 | 0  | 0 |
| 0 | 0 | 1    | 0  | 0 | 0  | 0 |
| 0 | 0 | 0    | 0  | 0 | 0  | 0 |
| 0 | 0 | 3    | 0  | 0 | 0  | 0 |
| 0 | 0 | 0    | 0  | 0 | 0  | 0 |
| 0 | 0 | 0    | 0  | 0 | 0  | 0 |

| 32.SUR | 32.DCM | 33.SUR | 33.DCM | 34.SUR | 34.DCM | 36.SUR |   |
|--------|--------|--------|--------|--------|--------|--------|---|
|        | 0      | 0      | 0      | 0      | 0      | 0      | 0 |
|        | 0      | 0      | 0      | 0      | 0      | 10     | 0 |
|        | 0      | 0      | 0      | 2      | 0      | 9      | 0 |
|        | 1      | 3      | 0      | 1      | 1      | 14     | 0 |
|        | 0      | 0      | 6      | 0      | 0      | 0      | 0 |
|        | 0      | 0      | 0      | 0      | 0      | 1      | 0 |
|        | 0      | 0      | 0      | 0      | 0      | 0      | 0 |
|        | 0      | 10     | 7      | 1      | 9      | 167    | 0 |
|        | 0      | 0      | 0      | 7      | 0      | 1      | 0 |
|        | 0      | 0      | 1      | 0      | 0      | 0      | 0 |
|        | 0      | 0      | 0      | 0      | 0      | 0      | 0 |
|        | 0      | 5      | 0      | 0      | 0      | 0      | 0 |
|        | 0      | 0      | 0      | 0      | 1      | 3      | 0 |
|        | 0      | 1      | 0      | 0      | 3      | 33     | 0 |
|        | 1      | 5      | 0      | 0      | 0      | 1      | 0 |
|        | 3      | 8      | 0      | 0      | 0      | 0      | 0 |
|        | 1      | 27     | 6      | 7      | 4      | 54     | 0 |
| 273    | 112    | 775    | 181    | 60     | 75     | 28     |   |
| 0      | 0      | 0      | 8      | 3948   | 182    | 75     |   |
| 0      | 1      | 0      | 1      | 0      | 16     | 6      |   |
| 0      | 0      | 0      | 0      | 0      | 0      | 0      |   |
| 0      | 2      | 0      | 0      | 0      | 0      | 0      |   |
| 0      | 0      | 0      | 0      | 0      | 0      | 0      |   |
| 0      | 0      | 0      | 0      | 0      | 0      | 0      |   |
| 0      | 0      | 0      | 0      | 0      | 0      | 1      |   |
| 0      | 0      | 0      | 0      | 0      | 0      | 0      |   |
| 0      | 0      | 0      | 0      | 0      | 0      | 0      |   |
| 0      | 0      | 0      | 0      | 0      | 0      | 0      |   |
| 1      | 0      | 0      | 1      | 0      | 1      | 0      |   |
| 0      | 0      | 0      | 0      | 0      | 0      | 1      |   |
| 0      | 0      | 0      | 0      | 0      | 0      | 0      |   |
| 1      | 15     | 0      | 12     | 2      | 11     | 0      |   |
| 1      | 3      | 0      | 0      | 0      | 12     | 0      |   |
| 0      | 2      | 0      | 1      | 0      | 4      | 0      |   |
| 0      | 0      | 0      | 0      | 0      | 0      | 0      |   |
| 0      | 838    | 5      | 7      | 23     | 4      | 16     |   |
| 647    | 46     | 1736   | 316    | 50     | 83     | 583    |   |
| 11     | 8      | 0      | 3      | 1      | 1      | 3      |   |
| 0      | 0      | 0      | 0      | 0      | 0      | 0      |   |
| 1      | 23     | 0      | 0      | 0      | 16     | 0      |   |
| 0      | 0      | 0      | 27     | 0      | 4      | 0      |   |
| 28     | 4      | 30     | 80     | 4      | 9      | 1      |   |
| 2      | 12     | 85     | 104    | 46     | 664    | 8      |   |
| 1      | 14     | 0      | 27     | 1      | 21     | 0      |   |
| 0      | 0      | 0      | 1      | 1      | 73     | 0      |   |
| 0      | 1      | 39     | 19     | 5      | 11     | 8      |   |

|     |     |      |     |     |     |     |
|-----|-----|------|-----|-----|-----|-----|
| 1   | 8   | 0    | 11  | 0   | 0   | 0   |
| 0   | 2   | 0    | 1   | 0   | 37  | 0   |
| 2   | 4   | 0    | 0   | 1   | 27  | 0   |
| 7   | 38  | 0    | 9   | 0   | 26  | 0   |
| 0   | 1   | 0    | 2   | 0   | 0   | 0   |
| 0   | 1   | 0    | 0   | 3   | 56  | 0   |
| 0   | 5   | 0    | 1   | 1   | 5   | 0   |
| 25  | 2   | 6    | 0   | 0   | 4   | 1   |
| 0   | 0   | 0    | 0   | 0   | 0   | 13  |
| 0   | 0   | 0    | 0   | 0   | 6   | 0   |
| 0   | 0   | 0    | 0   | 0   | 1   | 5   |
| 0   | 2   | 0    | 1   | 0   | 15  | 0   |
| 1   | 0   | 6    | 1   | 0   | 0   | 8   |
| 1   | 0   | 0    | 2   | 0   | 1   | 0   |
| 1   | 3   | 0    | 0   | 0   | 13  | 0   |
| 0   | 0   | 0    | 0   | 0   | 0   | 0   |
| 0   | 0   | 0    | 0   | 3   | 2   | 0   |
| 0   | 1   | 0    | 0   | 0   | 8   | 0   |
| 0   | 0   | 0    | 0   | 0   | 0   | 0   |
| 0   | 0   | 0    | 3   | 0   | 0   | 0   |
| 0   | 7   | 0    | 0   | 0   | 2   | 0   |
| 0   | 0   | 0    | 0   | 0   | 0   | 0   |
| 0   | 0   | 0    | 0   | 0   | 0   | 0   |
| 0   | 0   | 0    | 0   | 0   | 0   | 0   |
| 0   | 0   | 0    | 0   | 0   | 0   | 0   |
| 0   | 0   | 0    | 0   | 0   | 0   | 0   |
| 0   | 0   | 0    | 0   | 0   | 0   | 0   |
| 1   | 0   | 0    | 0   | 0   | 0   | 0   |
| 0   | 0   | 0    | 1   | 0   | 0   | 0   |
| 0   | 0   | 0    | 0   | 0   | 0   | 0   |
| 0   | 2   | 0    | 5   | 0   | 5   | 0   |
| 0   | 1   | 0    | 0   | 1   | 5   | 0   |
| 0   | 0   | 0    | 2   | 1   | 0   | 0   |
| 0   | 0   | 0    | 0   | 0   | 0   | 0   |
| 0   | 0   | 0    | 0   | 0   | 0   | 0   |
| 0   | 0   | 0    | 0   | 0   | 0   | 0   |
| 0   | 0   | 0    | 0   | 0   | 0   | 0   |
| 0   | 0   | 2    | 0   | 1   | 0   | 0   |
| 0   | 0   | 0    | 0   | 0   | 0   | 0   |
| 0   | 0   | 0    | 0   | 0   | 0   | 0   |
| 0   | 0   | 0    | 0   | 0   | 0   | 0   |
| 0   | 0   | 0    | 0   | 0   | 0   | 0   |
| 0   | 0   | 2    | 0   | 1   | 0   | 0   |
| 0   | 0   | 0    | 0   | 0   | 0   | 0   |
| 0   | 0   | 0    | 0   | 0   | 0   | 0   |
| 152 | 308 | 867  | 392 | 41  | 219 | 205 |
| 21  | 34  | 253  | 54  | 6   | 1   | 9   |
| 27  | 58  | 4529 | 182 | 144 | 8   | 572 |
| 0   | 9   | 0    | 0   | 2   | 44  | 0   |
| 0   | 0   | 8    | 1   | 0   | 0   | 0   |
| 0   | 0   | 0    | 0   | 0   | 2   | 0   |
| 0   | 0   | 0    | 0   | 0   | 0   | 0   |
| 0   | 0   | 0    | 0   | 0   | 10  | 0   |
| 0   | 0   | 2    | 0   | 0   | 0   | 0   |





|    |    |    |     |    |     |    |
|----|----|----|-----|----|-----|----|
| 3  | 2  | 0  | 0   | 1  | 7   | 0  |
| 0  | 0  | 0  | 0   | 0  | 0   | 0  |
| 66 | 6  | 41 | 26  | 2  | 1   | 38 |
| 0  | 0  | 0  | 1   | 4  | 0   | 0  |
| 0  | 0  | 2  | 0   | 1  | 1   | 6  |
| 0  | 0  | 0  | 0   | 0  | 0   | 0  |
| 0  | 0  | 0  | 0   | 0  | 0   | 0  |
| 0  | 0  | 0  | 0   | 0  | 0   | 0  |
| 0  | 0  | 0  | 0   | 0  | 0   | 0  |
| 0  | 0  | 57 | 0   | 0  | 0   | 0  |
| 0  | 4  | 4  | 2   | 0  | 1   | 0  |
| 0  | 1  | 0  | 0   | 0  | 3   | 0  |
| 13 | 67 | 18 | 104 | 89 | 583 | 0  |
| 0  | 0  | 0  | 0   | 0  | 0   | 0  |
| 1  | 1  | 0  | 36  | 0  | 18  | 0  |
| 3  | 20 | 1  | 10  | 1  | 60  | 0  |
| 0  | 3  | 0  | 23  | 0  | 0   | 0  |
| 4  | 4  | 0  | 9   | 0  | 8   | 0  |
| 1  | 0  | 32 | 0   | 0  | 0   | 0  |
| 0  | 0  | 4  | 0   | 0  | 0   | 0  |
| 0  | 0  | 1  | 9   | 1  | 2   | 3  |
| 0  | 0  | 0  | 0   | 0  | 0   | 0  |
| 0  | 0  | 0  | 0   | 0  | 0   | 0  |
| 0  | 0  | 0  | 0   | 0  | 1   | 0  |
| 0  | 0  | 0  | 0   | 0  | 1   | 0  |
| 0  | 0  | 0  | 0   | 0  | 0   | 0  |
| 0  | 0  | 0  | 0   | 0  | 0   | 0  |
| 0  | 0  | 0  | 0   | 0  | 0   | 0  |
| 0  | 0  | 0  | 0   | 0  | 0   | 0  |
| 0  | 0  | 0  | 0   | 0  | 0   | 0  |
| 0  | 0  | 2  | 0   | 0  | 0   | 0  |
| 0  | 0  | 2  | 2   | 0  | 0   | 0  |
| 0  | 0  | 1  | 0   | 3  | 0   | 0  |
| 0  | 0  | 22 | 0   | 1  | 1   | 0  |
| 0  | 0  | 0  | 0   | 0  | 0   | 0  |
| 0  | 0  | 0  | 2   | 0  | 2   | 0  |
| 0  | 0  | 0  | 0   | 0  | 0   | 0  |
| 0  | 0  | 0  | 0   | 0  | 0   | 0  |
| 0  | 0  | 0  | 0   | 0  | 0   | 0  |
| 0  | 0  | 0  | 0   | 0  | 0   | 7  |
| 0  | 0  | 0  | 0   | 0  | 0   | 0  |
| 0  | 0  | 0  | 0   | 0  | 0   | 0  |
| 0  | 0  | 0  | 0   | 0  | 0   | 0  |
| 0  | 0  | 0  | 0   | 0  | 0   | 0  |
| 0  | 0  | 0  | 0   | 0  | 0   | 0  |
| 0  | 2  | 52 | 69  | 20 | 23  | 90 |
| 0  | 43 | 0  | 0   | 0  | 6   | 5  |
| 0  | 2  | 0  | 0   | 4  | 0   | 2  |
| 0  | 0  | 0  | 0   | 0  | 0   | 0  |
| 1  | 0  | 0  | 0   | 2  | 0   | 0  |
| 0  | 1  | 0  | 0   | 0  | 0   | 0  |

|   |     |     |     |    |    |    |
|---|-----|-----|-----|----|----|----|
| 0 | 0   | 0   | 0   | 0  | 0  | 0  |
| 0 | 1   | 3   | 0   | 2  | 28 | 0  |
| 0 | 0   | 0   | 0   | 0  | 0  | 0  |
| 0 | 0   | 0   | 0   | 0  | 0  | 0  |
| 0 | 0   | 0   | 0   | 0  | 0  | 0  |
| 0 | 3   | 0   | 0   | 0  | 0  | 0  |
| 0 | 0   | 0   | 0   | 0  | 0  | 0  |
| 0 | 0   | 0   | 0   | 0  | 0  | 5  |
| 0 | 0   | 4   | 8   | 0  | 0  | 0  |
| 0 | 0   | 0   | 0   | 0  | 0  | 0  |
| 0 | 0   | 0   | 0   | 0  | 0  | 0  |
| 0 | 0   | 0   | 0   | 0  | 0  | 0  |
| 0 | 0   | 1   | 0   | 0  | 0  | 0  |
| 0 | 0   | 1   | 2   | 0  | 0  | 0  |
| 0 | 0   | 0   | 0   | 0  | 0  | 0  |
| 0 | 0   | 0   | 0   | 0  | 0  | 0  |
| 0 | 0   | 0   | 0   | 0  | 0  | 0  |
| 0 | 0   | 0   | 0   | 0  | 0  | 1  |
| 0 | 0   | 0   | 0   | 0  | 1  | 0  |
| 0 | 31  | 0   | 6   | 0  | 0  | 0  |
| 1 | 0   | 0   | 0   | 0  | 0  | 0  |
| 3 | 5   | 3   | 7   | 0  | 0  | 0  |
| 0 | 0   | 0   | 0   | 0  | 0  | 0  |
| 9 | 582 | 244 | 530 | 36 | 84 | 55 |
| 0 | 4   | 2   | 2   | 6  | 1  | 31 |
| 0 | 0   | 0   | 0   | 0  | 0  | 0  |
| 0 | 2   | 0   | 0   | 15 | 63 | 0  |
| 0 | 0   | 0   | 3   | 0  | 0  | 0  |
| 0 | 0   | 0   | 0   | 0  | 0  | 0  |
| 0 | 2   | 1   | 2   | 0  | 0  | 0  |
| 4 | 0   | 4   | 0   | 0  | 1  | 0  |
| 0 | 0   | 0   | 0   | 0  | 0  | 0  |
| 0 | 0   | 0   | 0   | 0  | 0  | 0  |
| 0 | 0   | 0   | 0   | 0  | 0  | 0  |
| 0 | 0   | 0   | 0   | 0  | 0  | 0  |
| 0 | 0   | 0   | 3   | 0  | 0  | 0  |
| 5 | 13  | 66  | 490 | 28 | 24 | 29 |
| 0 | 2   | 2   | 1   | 3  | 1  | 1  |
| 1 | 1   | 19  | 0   | 0  | 2  | 4  |
| 1 | 1   | 2   | 0   | 7  | 2  | 25 |
| 0 | 0   | 0   | 0   | 0  | 0  | 0  |
| 0 | 0   | 0   | 0   | 0  | 0  | 0  |
| 0 | 0   | 0   | 0   | 0  | 0  | 0  |
| 0 | 0   | 0   | 0   | 0  | 0  | 0  |
| 0 | 0   | 0   | 0   | 0  | 0  | 0  |
| 0 | 0   | 0   | 0   | 0  | 0  | 0  |
| 0 | 1   | 0   | 0   | 1  | 0  | 0  |
| 0 | 0   | 0   | 0   | 0  | 0  | 0  |
| 0 | 0   | 0   | 0   | 0  | 0  | 0  |

|    |     |     |     |      |     |    |
|----|-----|-----|-----|------|-----|----|
| 0  | 2   | 0   | 0   | 0    | 6   | 0  |
| 0  | 0   | 0   | 0   | 0    | 0   | 0  |
| 0  | 0   | 3   | 3   | 0    | 0   | 0  |
| 0  | 1   | 0   | 0   | 0    | 0   | 0  |
| 0  | 0   | 0   | 0   | 0    | 0   | 0  |
| 0  | 0   | 0   | 0   | 0    | 0   | 0  |
| 0  | 0   | 0   | 0   | 0    | 0   | 0  |
| 0  | 0   | 0   | 0   | 0    | 0   | 0  |
| 0  | 0   | 0   | 0   | 0    | 0   | 0  |
| 0  | 0   | 0   | 0   | 0    | 0   | 0  |
| 0  | 0   | 0   | 0   | 0    | 0   | 0  |
| 0  | 0   | 0   | 0   | 0    | 0   | 0  |
| 0  | 0   | 0   | 0   | 0    | 0   | 0  |
| 0  | 0   | 0   | 0   | 1    | 0   | 0  |
| 0  | 0   | 0   | 0   | 0    | 0   | 0  |
| 0  | 0   | 0   | 0   | 0    | 0   | 0  |
| 0  | 0   | 1   | 1   | 0    | 0   | 0  |
| 0  | 0   | 0   | 0   | 0    | 0   | 0  |
| 20 | 0   | 0   | 0   | 0    | 0   | 0  |
| 0  | 0   | 0   | 0   | 0    | 0   | 20 |
| 0  | 1   | 0   | 0   | 2092 | 55  | 0  |
| 0  | 0   | 0   | 0   | 0    | 0   | 0  |
| 59 | 379 | 199 | 142 | 23   | 314 | 3  |
| 1  | 0   | 1   | 0   | 8    | 5   | 0  |
| 2  | 0   | 16  | 56  | 3    | 2   | 0  |
| 1  | 0   | 6   | 2   | 0    | 0   | 0  |
| 0  | 0   | 0   | 0   | 0    | 0   | 0  |
| 0  | 0   | 0   | 1   | 0    | 3   | 0  |
| 0  | 0   | 0   | 1   | 0    | 0   | 0  |
| 0  | 0   | 0   | 0   | 0    | 0   | 0  |
| 0  | 0   | 0   | 0   | 0    | 0   | 0  |
| 5  | 5   | 1   | 18  | 0    | 24  | 0  |
| 0  | 0   | 0   | 6   | 0    | 1   | 0  |
| 0  | 0   | 0   | 0   | 0    | 0   | 0  |
| 0  | 0   | 0   | 0   | 0    | 0   | 0  |
| 1  | 2   | 0   | 0   | 2    | 17  | 0  |
| 0  | 1   | 0   | 12  | 0    | 6   | 0  |
| 2  | 1   | 1   | 0   | 0    | 12  | 0  |
| 0  | 0   | 0   | 0   | 0    | 0   | 0  |
| 0  | 0   | 0   | 0   | 0    | 0   | 0  |
| 0  | 0   | 0   | 0   | 0    | 0   | 0  |
| 0  | 0   | 0   | 0   | 0    | 3   | 0  |
| 0  | 0   | 0   | 0   | 0    | 0   | 0  |
| 0  | 0   | 0   | 0   | 0    | 0   | 0  |
| 1  | 7   | 0   | 5   | 0    | 2   | 0  |
| 0  | 0   | 0   | 0   | 0    | 0   | 0  |

|      |      |       |      |     |      |      |
|------|------|-------|------|-----|------|------|
| 1    | 6    | 0     | 1    | 0   | 2    | 0    |
| 0    | 2    | 0     | 1    | 0   | 0    | 0    |
| 0    | 0    | 0     | 0    | 0   | 0    | 0    |
| 19   | 30   | 2     | 72   | 8   | 0    | 32   |
| 0    | 0    | 0     | 0    | 0   | 0    | 7    |
| 0    | 0    | 0     | 0    | 0   | 0    | 0    |
| 34   | 147  | 283   | 135  | 42  | 41   | 77   |
| 0    | 0    | 0     | 0    | 0   | 0    | 0    |
| 0    | 0    | 6     | 1    | 5   | 3    | 0    |
| 0    | 0    | 0     | 0    | 0   | 0    | 0    |
| 0    | 0    | 0     | 0    | 0   | 0    | 0    |
| 3533 | 1818 | 10673 | 2825 | 598 | 2804 | 2284 |
| 110  | 13   | 732   | 113  | 62  | 4    | 103  |
| 141  | 149  | 1604  | 185  | 106 | 297  | 2    |
| 119  | 99   | 354   | 36   | 25  | 192  | 10   |
| 26   | 37   | 26    | 57   | 14  | 68   | 54   |
| 49   | 9    | 960   | 112  | 20  | 35   | 18   |
| 5    | 2    | 39    | 22   | 2   | 5    | 0    |
| 20   | 35   | 165   | 18   | 15  | 65   | 0    |
| 11   | 44   | 8     | 1    | 4   | 116  | 3    |
| 3    | 25   | 0     | 26   | 2   | 62   | 0    |
| 0    | 10   | 5     | 74   | 8   | 32   | 22   |
| 0    | 0    | 0     | 0    | 1   | 0    | 0    |
| 2    | 14   | 0     | 28   | 0   | 41   | 0    |
| 0    | 0    | 0     | 40   | 1   | 0    | 0    |
| 1    | 0    | 0     | 1    | 0   | 0    | 0    |
| 0    | 0    | 0     | 1    | 0   | 0    | 0    |
| 0    | 0    | 0     | 56   | 0   | 0    | 0    |
| 0    | 0    | 0     | 0    | 0   | 0    | 0    |
| 3    | 25   | 4     | 35   | 0   | 20   | 0    |
| 0    | 0    | 0     | 0    | 0   | 7    | 0    |
| 0    | 0    | 0     | 0    | 0   | 0    | 0    |
| 0    | 0    | 0     | 0    | 0   | 0    | 4    |
| 0    | 0    | 0     | 0    | 0   | 1    | 0    |
| 0    | 0    | 0     | 0    | 0   | 0    | 0    |
| 3    | 0    | 0     | 0    | 0   | 0    | 0    |
| 107  | 22   | 110   | 97   | 6   | 27   | 114  |
| 0    | 18   | 0     | 0    | 0   | 0    | 0    |
| 0    | 4    | 0     | 0    | 0   | 47   | 0    |
| 0    | 0    | 0     | 6    | 0   | 0    | 0    |
| 1    | 5    | 0     | 0    | 0   | 8    | 0    |
| 39   | 2    | 44    | 46   | 1   | 2    | 0    |
| 61   | 5    | 39    | 39   | 4   | 14   | 2    |
| 0    | 1    | 0     | 0    | 0   | 41   | 0    |
| 0    | 0    | 0     | 0    | 0   | 0    | 0    |
| 0    | 0    | 2     | 0    | 4   | 9    | 0    |
| 2    | 28   | 0     | 2    | 0   | 27   | 0    |
| 0    | 0    | 0     | 0    | 0   | 0    | 0    |

|    |   |    |    |   |    |    |
|----|---|----|----|---|----|----|
| 0  | 0 | 0  | 0  | 3 | 0  | 0  |
| 5  | 3 | 9  | 2  | 0 | 20 | 0  |
| 0  | 0 | 0  | 0  | 0 | 0  | 0  |
| 9  | 0 | 2  | 0  | 0 | 0  | 0  |
| 0  | 0 | 0  | 12 | 0 | 0  | 0  |
| 0  | 0 | 0  | 0  | 0 | 0  | 0  |
| 0  | 0 | 0  | 0  | 0 | 0  | 0  |
| 2  | 4 | 4  | 11 | 1 | 26 | 0  |
| 0  | 0 | 0  | 0  | 2 | 20 | 0  |
| 0  | 0 | 0  | 0  | 0 | 0  | 0  |
| 0  | 0 | 0  | 0  | 0 | 0  | 0  |
| 0  | 0 | 0  | 0  | 0 | 0  | 0  |
| 0  | 0 | 0  | 0  | 1 | 0  | 0  |
| 0  | 4 | 0  | 0  | 0 | 3  | 0  |
| 0  | 0 | 0  | 0  | 0 | 0  | 0  |
| 0  | 0 | 0  | 2  | 0 | 0  | 0  |
| 0  | 2 | 0  | 0  | 0 | 13 | 20 |
| 29 | 0 | 1  | 13 | 0 | 0  | 0  |
| 0  | 0 | 0  | 0  | 1 | 2  | 0  |
| 0  | 0 | 0  | 2  | 0 | 1  | 0  |
| 4  | 4 | 21 | 5  | 4 | 3  | 6  |
| 0  | 0 | 0  | 0  | 0 | 0  | 0  |
| 0  | 0 | 0  | 0  | 0 | 0  | 0  |
| 0  | 0 | 0  | 0  | 0 | 4  | 0  |
| 0  | 1 | 2  | 1  | 0 | 0  | 1  |
| 0  | 0 | 0  | 0  | 0 | 0  | 0  |
| 0  | 0 | 0  | 0  | 0 | 0  | 0  |
| 0  | 0 | 0  | 1  | 0 | 3  | 0  |
| 0  | 0 | 0  | 0  | 0 | 0  | 0  |
| 0  | 1 | 0  | 7  | 0 | 1  | 3  |
| 8  | 2 | 4  | 2  | 0 | 0  | 5  |
| 1  | 6 | 19 | 3  | 3 | 10 | 1  |
| 1  | 0 | 3  | 2  | 0 | 0  | 6  |
| 0  | 1 | 0  | 1  | 0 | 0  | 0  |
| 3  | 1 | 0  | 5  | 0 | 4  | 0  |
| 1  | 1 | 26 | 2  | 2 | 4  | 0  |
| 0  | 0 | 0  | 0  | 0 | 0  | 0  |
| 0  | 0 | 0  | 2  | 0 | 1  | 0  |
| 1  | 0 | 10 | 2  | 1 | 2  | 0  |
| 0  | 0 | 7  | 0  | 0 | 3  | 0  |
| 0  | 0 | 0  | 0  | 0 | 0  | 0  |
| 0  | 0 | 0  | 0  | 0 | 0  | 0  |
| 0  | 0 | 1  | 0  | 0 | 0  | 0  |
| 0  | 0 | 0  | 0  | 0 | 4  | 0  |
| 0  | 0 | 0  | 0  | 0 | 0  | 0  |
| 0  | 0 | 0  | 0  | 0 | 0  | 0  |
| 0  | 0 | 0  | 0  | 0 | 0  | 0  |
| 1  | 3 | 0  | 0  | 1 | 1  | 0  |



|     |     |     |     |    |     |    |
|-----|-----|-----|-----|----|-----|----|
| 7   | 9   | 3   | 13  | 1  | 11  | 0  |
| 1   | 3   | 0   | 4   | 0  | 10  | 0  |
| 1   | 9   | 0   | 5   | 1  | 5   | 0  |
| 4   | 10  | 8   | 21  | 1  | 5   | 0  |
| 0   | 1   | 0   | 1   | 0  | 0   | 0  |
| 0   | 0   | 0   | 0   | 0  | 0   | 0  |
| 351 | 53  | 273 | 9   | 79 | 236 | 54 |
| 0   | 11  | 0   | 5   | 3  | 42  | 0  |
| 27  | 94  | 67  | 124 | 7  | 132 | 0  |
| 0   | 12  | 1   | 51  | 1  | 22  | 0  |
| 0   | 34  | 1   | 13  | 1  | 103 | 0  |
| 0   | 0   | 0   | 0   | 0  | 0   | 0  |
| 2   | 9   | 0   | 0   | 0  | 9   | 0  |
| 0   | 0   | 0   | 0   | 0  | 0   | 0  |
| 0   | 1   | 0   | 0   | 0  | 2   | 0  |
| 0   | 0   | 0   | 0   | 0  | 0   | 0  |
| 0   | 0   | 0   | 0   | 0  | 0   | 0  |
| 0   | 0   | 0   | 0   | 0  | 0   | 0  |
| 49  | 352 | 351 | 342 | 58 | 477 | 0  |
| 0   | 0   | 0   | 1   | 0  | 0   | 0  |
| 0   | 0   | 0   | 0   | 0  | 0   | 0  |
| 0   | 1   | 0   | 1   | 0  | 4   | 0  |
| 0   | 0   | 0   | 4   | 0  | 1   | 0  |
| 0   | 0   | 0   | 0   | 0  | 0   | 0  |
| 0   | 0   | 0   | 0   | 0  | 0   | 0  |
| 0   | 0   | 0   | 0   | 0  | 0   | 0  |
| 0   | 0   | 0   | 0   | 0  | 0   | 0  |
| 3   | 0   | 0   | 0   | 0  | 0   | 5  |
| 0   | 0   | 0   | 0   | 0  | 0   | 0  |
| 0   | 0   | 0   | 0   | 0  | 0   | 0  |
| 0   | 0   | 0   | 0   | 0  | 0   | 0  |
| 0   | 0   | 0   | 0   | 0  | 0   | 0  |
| 0   | 0   | 0   | 0   | 0  | 0   | 0  |
| 0   | 0   | 0   | 0   | 0  | 0   | 0  |
| 0   | 0   | 0   | 0   | 0  | 0   | 9  |
| 0   | 1   | 0   | 0   | 0  | 4   | 0  |
| 0   | 0   | 0   | 0   | 0  | 0   | 0  |
| 0   | 0   | 0   | 0   | 0  | 0   | 0  |
| 0   | 0   | 0   | 4   | 0  | 14  | 0  |
| 0   | 0   | 0   | 0   | 0  | 0   | 0  |
| 0   | 0   | 0   | 0   | 0  | 0   | 0  |
| 0   | 0   | 4   | 1   | 0  | 0   | 0  |
| 0   | 0   | 0   | 1   | 1  | 3   | 0  |
| 0   | 0   | 0   | 0   | 0  | 0   | 0  |
| 2   | 4   | 0   | 6   | 0  | 18  | 0  |
| 0   | 3   | 0   | 2   | 0  | 0   | 0  |
| 0   | 0   | 0   | 0   | 0  | 0   | 0  |
| 0   | 0   | 0   | 0   | 0  | 0   | 0  |
| 0   | 0   | 0   | 0   | 0  | 0   | 0  |
| 0   | 0   | 0   | 0   | 0  | 0   | 0  |











|    |    |     |    |    |    |     |
|----|----|-----|----|----|----|-----|
| 0  | 0  | 0   | 0  | 0  | 0  | 0   |
| 36 | 27 | 341 | 26 | 65 | 33 | 39  |
| 6  | 2  | 94  | 21 | 20 | 6  | 115 |
| 17 | 4  | 121 | 5  | 5  | 4  | 9   |
| 0  | 0  | 3   | 0  | 0  | 0  | 26  |
| 0  | 0  | 0   | 0  | 1  | 1  | 0   |
| 6  | 2  | 1   | 1  | 1  | 4  | 7   |
| 0  | 0  | 0   | 0  | 0  | 0  | 2   |
| 0  | 0  | 0   | 0  | 0  | 0  | 0   |
| 36 | 4  | 43  | 13 | 5  | 2  | 0   |
| 0  | 7  | 0   | 1  | 0  | 3  | 0   |
| 0  | 0  | 0   | 3  | 0  | 0  | 0   |
| 0  | 0  | 0   | 0  | 0  | 0  | 0   |
| 1  | 0  | 2   | 0  | 0  | 0  | 13  |
| 3  | 2  | 0   | 0  | 2  | 0  | 6   |
| 0  | 0  | 0   | 0  | 0  | 0  | 0   |
| 0  | 0  | 0   | 0  | 0  | 4  | 0   |
| 0  | 0  | 0   | 0  | 0  | 0  | 0   |
| 0  | 0  | 0   | 0  | 0  | 0  | 0   |
| 1  | 0  | 6   | 0  | 2  | 1  | 0   |
| 1  | 0  | 0   | 1  | 0  | 0  | 0   |
| 0  | 0  | 0   | 2  | 0  | 0  | 0   |
| 0  | 0  | 0   | 1  | 0  | 0  | 0   |
| 1  | 0  | 1   | 1  | 0  | 0  | 0   |
| 0  | 0  | 0   | 0  | 1  | 3  | 0   |
| 0  | 0  | 0   | 0  | 0  | 0  | 0   |
| 0  | 0  | 0   | 0  | 0  | 0  | 0   |
| 0  | 0  | 0   | 0  | 0  | 0  | 0   |
| 0  | 1  | 0   | 0  | 0  | 0  | 0   |
| 0  | 0  | 0   | 0  | 0  | 0  | 0   |
| 0  | 0  | 2   | 2  | 0  | 0  | 2   |
| 0  | 0  | 0   | 0  | 0  | 0  | 0   |
| 0  | 0  | 0   | 1  | 8  | 0  | 6   |
| 7  | 6  | 66  | 11 | 13 | 1  | 19  |
| 4  | 5  | 71  | 2  | 7  | 5  | 0   |
| 0  | 0  | 30  | 13 | 8  | 7  | 13  |
| 0  | 3  | 99  | 0  | 29 | 0  | 73  |
| 0  | 0  | 117 | 0  | 0  | 0  | 28  |
| 36 | 37 | 29  | 9  | 6  | 12 | 6   |
| 16 | 19 | 5   | 8  | 1  | 18 | 18  |
| 0  | 0  | 0   | 1  | 0  | 0  | 0   |
| 2  | 2  | 64  | 2  | 9  | 0  | 11  |
| 0  | 0  | 0   | 0  | 0  | 0  | 0   |
| 5  | 1  | 0   | 6  | 2  | 1  | 0   |
| 0  | 0  | 0   | 0  | 2  | 0  | 26  |
| 0  | 0  | 22  | 2  | 0  | 0  | 48  |
| 0  | 0  | 0   | 0  | 0  | 0  | 27  |
| 0  | 0  | 0   | 1  | 0  | 1  | 0   |

|    |    |   |    |   |    |   |
|----|----|---|----|---|----|---|
| 0  | 0  | 0 | 0  | 0 | 0  | 0 |
| 0  | 0  | 0 | 0  | 0 | 0  | 0 |
| 0  | 0  | 0 | 0  | 0 | 0  | 0 |
| 0  | 0  | 0 | 0  | 0 | 0  | 0 |
| 0  | 0  | 0 | 0  | 0 | 0  | 0 |
| 0  | 0  | 0 | 0  | 0 | 0  | 0 |
| 0  | 0  | 0 | 0  | 0 | 0  | 0 |
| 0  | 0  | 0 | 0  | 0 | 0  | 0 |
| 0  | 0  | 0 | 0  | 0 | 0  | 0 |
| 0  | 0  | 0 | 0  | 0 | 0  | 0 |
| 0  | 0  | 0 | 0  | 0 | 0  | 0 |
| 1  | 0  | 0 | 1  | 0 | 0  | 0 |
| 0  | 0  | 0 | 0  | 0 | 0  | 0 |
| 0  | 0  | 0 | 0  | 0 | 0  | 0 |
| 0  | 0  | 0 | 0  | 0 | 0  | 0 |
| 0  | 0  | 0 | 0  | 0 | 0  | 0 |
| 0  | 0  | 0 | 0  | 0 | 0  | 0 |
| 0  | 0  | 0 | 0  | 0 | 0  | 0 |
| 0  | 0  | 0 | 0  | 0 | 0  | 0 |
| 0  | 5  | 0 | 0  | 1 | 3  | 0 |
| 0  | 1  | 0 | 0  | 1 | 0  | 0 |
| 0  | 0  | 0 | 0  | 0 | 0  | 0 |
| 0  | 0  | 0 | 0  | 0 | 0  | 0 |
| 0  | 1  | 3 | 0  | 1 | 1  | 0 |
| 0  | 0  | 0 | 14 | 0 | 0  | 0 |
| 0  | 0  | 0 | 0  | 4 | 25 | 0 |
| 0  | 0  | 0 | 0  | 0 | 0  | 0 |
| 0  | 0  | 0 | 0  | 0 | 0  | 0 |
| 0  | 1  | 0 | 0  | 0 | 0  | 0 |
| 0  | 0  | 0 | 0  | 0 | 0  | 0 |
| 2  | 53 | 2 | 0  | 1 | 5  | 0 |
| 0  | 0  | 4 | 0  | 1 | 7  | 0 |
| 2  | 1  | 0 | 0  | 0 | 0  | 0 |
| 0  | 8  | 0 | 0  | 0 | 2  | 0 |
| 0  | 7  | 0 | 0  | 0 | 2  | 0 |
| 2  | 0  | 1 | 0  | 0 | 2  | 0 |
| 0  | 0  | 0 | 0  | 0 | 1  | 0 |
| 0  | 0  | 0 | 0  | 0 | 0  | 0 |
| 0  | 0  | 0 | 0  | 0 | 0  | 0 |
| 0  | 0  | 0 | 0  | 0 | 0  | 0 |
| 0  | 0  | 0 | 0  | 0 | 1  | 0 |
| 0  | 0  | 0 | 0  | 0 | 0  | 0 |
| 0  | 0  | 0 | 0  | 0 | 0  | 0 |
| 0  | 0  | 0 | 0  | 0 | 0  | 0 |
| 0  | 0  | 0 | 0  | 0 | 0  | 0 |
| 0  | 47 | 1 | 0  | 3 | 20 | 0 |
| 0  | 0  | 0 | 0  | 0 | 0  | 0 |
| 22 | 3  | 2 | 0  | 0 | 0  | 0 |
| 0  | 0  | 0 | 0  | 0 | 0  | 0 |
| 0  | 0  | 0 | 0  | 0 | 0  | 0 |
| 0  | 0  | 0 | 0  | 0 | 0  | 0 |
| 0  | 0  | 0 | 0  | 0 | 0  | 0 |

|      |      |      |    |     |      |     |
|------|------|------|----|-----|------|-----|
| 5713 | 9305 | 3854 | 76 | 602 | 2224 | 23  |
| 52   | 110  | 65   | 9  | 20  | 57   | 7   |
| 0    | 0    | 0    | 0  | 0   | 0    | 0   |
| 25   | 18   | 0    | 0  | 0   | 0    | 0   |
| 1    | 2    | 0    | 0  | 0   | 1    | 0   |
| 0    | 0    | 0    | 0  | 0   | 2    | 0   |
| 0    | 0    | 0    | 0  | 0   | 0    | 0   |
| 0    | 1    | 0    | 0  | 0   | 0    | 0   |
| 0    | 0    | 0    | 0  | 0   | 0    | 0   |
| 0    | 0    | 0    | 0  | 0   | 0    | 0   |
| 0    | 0    | 0    | 0  | 0   | 0    | 0   |
| 0    | 0    | 0    | 0  | 0   | 0    | 0   |
| 464  | 121  | 394  | 2  | 33  | 62   | 0   |
| 0    | 419  | 0    | 0  | 0   | 4    | 1   |
| 36   | 16   | 142  | 56 | 28  | 22   | 0   |
| 0    | 0    | 0    | 0  | 0   | 0    | 0   |
| 0    | 3    | 0    | 0  | 0   | 0    | 0   |
| 0    | 0    | 0    | 0  | 0   | 0    | 0   |
| 0    | 0    | 0    | 0  | 0   | 0    | 0   |
| 24   | 159  | 2    | 1  | 4   | 0    | 0   |
| 9    | 8    | 0    | 0  | 6   | 13   | 0   |
| 0    | 0    | 0    | 0  | 0   | 0    | 0   |
| 0    | 0    | 0    | 0  | 0   | 0    | 0   |
| 1    | 2    | 0    | 0  | 2   | 0    | 0   |
| 141  | 162  | 136  | 26 | 52  | 66   | 157 |
| 0    | 0    | 27   | 0  | 0   | 0    | 0   |
| 0    | 0    | 0    | 0  | 0   | 0    | 0   |
| 1    | 4    | 2    | 1  | 0   | 1    | 0   |
| 18   | 1    | 184  | 11 | 9   | 3    | 0   |
| 361  | 33   | 255  | 29 | 20  | 5    | 48  |
| 16   | 8    | 185  | 2  | 12  | 2    | 147 |
| 3    | 54   | 140  | 35 | 360 | 273  | 0   |
| 2    | 0    | 56   | 2  | 7   | 6    | 0   |
| 256  | 46   | 1    | 1  | 2   | 0    | 0   |
| 0    | 0    | 2    | 3  | 2   | 0    | 0   |
| 1    | 1    | 3    | 0  | 1   | 0    | 0   |
| 9    | 9    | 0    | 0  | 2   | 0    | 28  |
| 0    | 0    | 0    | 0  | 0   | 0    | 0   |
| 0    | 0    | 0    | 0  | 0   | 0    | 0   |
| 0    | 0    | 0    | 0  | 0   | 0    | 0   |
| 0    | 0    | 0    | 0  | 0   | 0    | 0   |
| 0    | 0    | 0    | 0  | 0   | 0    | 0   |
| 0    | 0    | 0    | 0  | 0   | 0    | 0   |
| 1503 | 89   | 280  | 67 | 56  | 67   | 0   |
| 222  | 301  | 120  | 4  | 152 | 240  | 293 |
| 0    | 0    | 2    | 1  | 0   | 0    | 0   |
| 11   | 1    | 12   | 2  | 0   | 0    | 0   |
| 9    | 2    | 283  | 6  | 3   | 1    | 1   |

|      |      |      |     |     |     |     |
|------|------|------|-----|-----|-----|-----|
| 0    | 0    | 0    | 0   | 0   | 0   | 0   |
| 1    | 0    | 0    | 0   | 0   | 0   | 0   |
| 1    | 0    | 0    | 0   | 1   | 0   | 0   |
| 0    | 0    | 0    | 0   | 0   | 0   | 0   |
| 0    | 0    | 0    | 0   | 0   | 0   | 0   |
| 0    | 0    | 0    | 0   | 0   | 0   | 0   |
| 0    | 0    | 0    | 0   | 0   | 0   | 0   |
| 0    | 0    | 0    | 0   | 0   | 0   | 0   |
| 1    | 0    | 0    | 0   | 0   | 0   | 0   |
| 1    | 1026 | 0    | 5   | 0   | 68  | 0   |
| 0    | 3    | 0    | 0   | 0   | 4   | 0   |
| 6    | 3    | 0    | 0   | 0   | 1   | 0   |
| 0    | 24   | 0    | 0   | 0   | 0   | 0   |
| 0    | 0    | 0    | 0   | 0   | 0   | 0   |
| 0    | 0    | 0    | 0   | 0   | 0   | 0   |
| 7412 | 1421 | 392  | 70  | 215 | 289 | 0   |
| 3903 | 1813 | 1511 | 102 | 103 | 236 | 0   |
| 20   | 2    | 2493 | 1   | 4   | 6   | 0   |
| 5    | 0    | 10   | 1   | 2   | 0   | 0   |
| 0    | 0    | 0    | 0   | 0   | 0   | 0   |
| 0    | 0    | 1    | 0   | 0   | 0   | 0   |
| 0    | 0    | 0    | 0   | 0   | 0   | 0   |
| 0    | 0    | 0    | 0   | 0   | 0   | 0   |
| 0    | 0    | 3    | 0   | 0   | 1   | 0   |
| 0    | 0    | 0    | 0   | 0   | 0   | 0   |
| 0    | 0    | 1    | 1   | 0   | 0   | 0   |
| 0    | 0    | 1    | 0   | 0   | 0   | 0   |
| 0    | 0    | 0    | 0   | 0   | 0   | 0   |
| 433  | 206  | 2    | 5   | 0   | 0   | 1   |
| 46   | 31   | 13   | 2   | 7   | 5   | 697 |
| 715  | 375  | 5    | 3   | 0   | 13  | 81  |
| 0    | 32   | 0    | 1   | 2   | 23  | 1   |
| 21   | 3    | 158  | 12  | 6   | 7   | 101 |
| 0    | 0    | 0    | 0   | 0   | 0   | 0   |
| 0    | 1    | 0    | 0   | 0   | 0   | 0   |
| 0    | 0    | 0    | 0   | 0   | 0   | 0   |
| 0    | 0    | 6    | 0   | 0   | 0   | 0   |
| 0    | 0    | 2    | 0   | 0   | 0   | 0   |
| 318  | 1347 | 1011 | 94  | 45  | 118 | 99  |
| 1057 | 650  | 5    | 3   | 10  | 251 | 0   |
| 100  | 2110 | 0    | 0   | 2   | 46  | 0   |
| 1    | 1380 | 0    | 1   | 1   | 40  | 0   |
| 163  | 309  | 1    | 1   | 0   | 52  | 1   |
| 1    | 13   | 0    | 0   | 0   | 1   | 0   |
| 0    | 2    | 0    | 0   | 0   | 1   | 0   |
| 2    | 5    | 0    | 0   | 1   | 2   | 0   |
| 0    | 66   | 0    | 0   | 0   | 1   | 0   |
| 0    | 1    | 0    | 0   | 0   | 0   | 0   |

|     |     |     |    |     |     |    |
|-----|-----|-----|----|-----|-----|----|
| 0   | 0   | 0   | 0  | 0   | 0   | 0  |
| 0   | 0   | 0   | 0  | 0   | 0   | 0  |
| 0   | 0   | 0   | 0  | 0   | 0   | 0  |
| 0   | 0   | 0   | 0  | 0   | 0   | 0  |
| 0   | 2   | 0   | 0  | 0   | 0   | 0  |
| 0   | 0   | 0   | 0  | 0   | 0   | 0  |
| 0   | 1   | 0   | 0  | 0   | 0   | 0  |
| 0   | 3   | 0   | 0  | 0   | 0   | 0  |
| 0   | 0   | 0   | 0  | 0   | 0   | 0  |
| 1   | 0   | 2   | 1  | 0   | 0   | 0  |
| 0   | 0   | 0   | 0  | 0   | 0   | 0  |
| 0   | 2   | 0   | 0  | 0   | 0   | 0  |
| 0   | 0   | 0   | 0  | 0   | 0   | 0  |
| 0   | 0   | 0   | 0  | 0   | 0   | 0  |
| 11  | 3   | 10  | 7  | 0   | 0   | 0  |
| 1   | 0   | 0   | 0  | 0   | 0   | 0  |
| 0   | 2   | 0   | 6  | 0   | 1   | 1  |
| 44  | 12  | 3   | 6  | 6   | 3   | 0  |
| 14  | 7   | 0   | 0  | 1   | 0   | 6  |
| 8   | 0   | 129 | 0  | 0   | 0   | 0  |
| 0   | 0   | 0   | 0  | 0   | 0   | 0  |
| 0   | 0   | 0   | 0  | 0   | 0   | 0  |
| 2   | 8   | 0   | 0  | 0   | 0   | 0  |
| 0   | 0   | 0   | 0  | 26  | 0   | 0  |
| 0   | 0   | 0   | 0  | 0   | 0   | 0  |
| 748 | 337 | 494 | 10 | 105 | 245 | 0  |
| 98  | 540 | 0   | 0  | 0   | 0   | 1  |
| 2   | 98  | 2   | 0  | 0   | 6   | 0  |
| 0   | 0   | 0   | 0  | 0   | 0   | 0  |
| 2   | 2   | 0   | 0  | 0   | 0   | 0  |
| 0   | 30  | 0   | 17 | 2   | 73  | 3  |
| 3   | 2   | 2   | 0  | 0   | 6   | 15 |
| 0   | 0   | 0   | 0  | 0   | 0   | 0  |
| 0   | 2   | 0   | 0  | 0   | 1   | 0  |
| 0   | 0   | 0   | 0  | 1   | 0   | 0  |
| 0   | 0   | 0   | 0  | 0   | 0   | 0  |
| 0   | 0   | 0   | 0  | 0   | 0   | 0  |
| 0   | 0   | 0   | 0  | 0   | 0   | 0  |
| 3   | 1   | 0   | 0  | 0   | 0   | 0  |
| 0   | 0   | 0   | 0  | 0   | 0   | 0  |
| 0   | 0   | 0   | 0  | 0   | 0   | 0  |
| 0   | 0   | 0   | 0  | 0   | 0   | 0  |
| 0   | 0   | 1   | 0  | 0   | 0   | 0  |
| 5   | 2   | 0   | 1  | 0   | 0   | 0  |
| 21  | 1   | 21  | 3  | 1   | 0   | 0  |
| 0   | 0   | 0   | 0  | 0   | 0   | 0  |
| 0   | 0   | 0   | 0  | 0   | 0   | 0  |
| 2   | 2   | 0   | 0  | 0   | 0   | 0  |



|     |     |      |     |     |     |     |
|-----|-----|------|-----|-----|-----|-----|
| 0   | 0   | 0    | 0   | 0   | 0   | 0   |
| 0   | 0   | 0    | 0   | 0   | 0   | 0   |
| 426 | 573 | 3489 | 454 | 144 | 170 | 383 |
| 534 | 23  | 32   | 6   | 107 | 4   | 5   |
| 96  | 91  | 483  | 266 | 31  | 43  | 249 |
| 0   | 0   | 0    | 7   | 2   | 7   | 0   |
| 29  | 54  | 287  | 59  | 10  | 7   | 153 |
| 2   | 3   | 28   | 100 | 9   | 91  | 0   |
| 29  | 19  | 23   | 113 | 2   | 1   | 2   |
| 29  | 1   | 27   | 11  | 20  | 0   | 166 |
| 0   | 0   | 0    | 2   | 5   | 0   | 198 |
| 0   | 1   | 0    | 5   | 1   | 50  | 0   |
| 7   | 17  | 466  | 26  | 5   | 1   | 226 |
| 2   | 2   | 130  | 12  | 25  | 7   | 0   |
| 119 | 68  | 499  | 137 | 56  | 29  | 4   |
| 0   | 1   | 0    | 8   | 3   | 0   | 0   |
| 1   | 2   | 186  | 134 | 2   | 33  | 11  |
| 1   | 1   | 41   | 2   | 0   | 0   | 3   |
| 35  | 22  | 34   | 30  | 13  | 2   | 24  |
| 5   | 12  | 205  | 28  | 2   | 0   | 4   |
| 0   | 0   | 0    | 3   | 0   | 0   | 0   |
| 0   | 0   | 0    | 0   | 1   | 0   | 1   |
| 22  | 112 | 0    | 12  | 1   | 19  | 0   |
| 2   | 6   | 4    | 4   | 4   | 1   | 0   |
| 2   | 5   | 48   | 3   | 1   | 7   | 39  |
| 13  | 39  | 76   | 6   | 1   | 1   | 154 |
| 14  | 24  | 87   | 67  | 7   | 29  | 0   |
| 0   | 0   | 0    | 1   | 0   | 0   | 0   |
| 1   | 11  | 0    | 0   | 1   | 41  | 0   |
| 0   | 0   | 0    | 0   | 0   | 0   | 0   |
| 0   | 0   | 0    | 4   | 5   | 0   | 0   |
| 0   | 0   | 0    | 3   | 0   | 0   | 0   |
| 0   | 0   | 0    | 0   | 0   | 0   | 0   |
| 0   | 0   | 0    | 0   | 0   | 1   | 0   |
| 0   | 0   | 0    | 0   | 0   | 0   | 0   |
| 0   | 0   | 0    | 1   | 0   | 1   | 0   |
| 3   | 5   | 1    | 0   | 0   | 1   | 0   |
| 1   | 0   | 0    | 0   | 0   | 2   | 0   |
| 0   | 0   | 0    | 0   | 0   | 0   | 0   |
| 0   | 0   | 0    | 0   | 0   | 0   | 0   |
| 0   | 0   | 0    | 0   | 0   | 0   | 0   |
| 0   | 0   | 0    | 0   | 0   | 0   | 0   |
| 5   | 1   | 0    | 0   | 0   | 0   | 0   |
| 0   | 0   | 0    | 0   | 0   | 0   | 0   |
| 0   | 0   | 0    | 0   | 0   | 0   | 0   |
| 0   | 0   | 0    | 0   | 2   | 2   | 0   |
| 0   | 0   | 0    | 0   | 0   | 0   | 0   |
| 0   | 14  | 0    | 0   | 0   | 10  | 0   |



|      |     |      |     |     |     |      |
|------|-----|------|-----|-----|-----|------|
| 0    | 0   | 0    | 0   | 0   | 0   | 0    |
| 0    | 0   | 0    | 0   | 0   | 0   | 0    |
| 0    | 0   | 0    | 0   | 0   | 0   | 0    |
| 4    | 30  | 6    | 6   | 0   | 0   | 2    |
| 0    | 0   | 0    | 0   | 0   | 0   | 0    |
| 0    | 0   | 1    | 0   | 2   | 2   | 0    |
| 0    | 0   | 0    | 0   | 0   | 0   | 0    |
| 0    | 0   | 13   | 0   | 0   | 0   | 0    |
| 2788 | 300 | 485  | 60  | 27  | 50  | 24   |
| 1213 | 671 | 3990 | 524 | 393 | 282 | 1379 |
| 2    | 5   | 11   | 2   | 0   | 0   | 0    |
| 117  | 1   | 29   | 2   | 1   | 0   | 0    |
| 258  | 31  | 283  | 35  | 53  | 26  | 153  |
| 27   | 2   | 37   | 12  | 6   | 3   | 8    |
| 0    | 6   | 0    | 0   | 0   | 3   | 0    |
| 2    | 7   | 7    | 2   | 1   | 0   | 2    |
| 7    | 1   | 127  | 5   | 49  | 19  | 0    |
| 13   | 3   | 1    | 4   | 6   | 1   | 2    |
| 2    | 0   | 0    | 0   | 0   | 0   | 15   |
| 3    | 1   | 18   | 0   | 2   | 0   | 0    |
| 5    | 7   | 2    | 2   | 0   | 0   | 0    |
| 1    | 8   | 6    | 0   | 1   | 6   | 0    |
| 47   | 1   | 60   | 0   | 5   | 1   | 4    |
| 0    | 0   | 0    | 7   | 0   | 0   | 0    |
| 4    | 8   | 37   | 1   | 0   | 0   | 0    |
| 1    | 3   | 34   | 1   | 1   | 0   | 0    |
| 1    | 2   | 2    | 0   | 0   | 0   | 0    |
| 5    | 6   | 41   | 5   | 15  | 2   | 7    |
| 0    | 2   | 1    | 2   | 0   | 1   | 0    |
| 0    | 0   | 0    | 0   | 0   | 0   | 0    |
| 0    | 0   | 0    | 0   | 0   | 0   | 2    |
| 7    | 1   | 0    | 0   | 0   | 0   | 0    |
| 0    | 1   | 4    | 0   | 0   | 0   | 0    |
| 0    | 3   | 4    | 1   | 0   | 0   | 1    |
| 0    | 0   | 0    | 0   | 0   | 0   | 1    |
| 0    | 0   | 0    | 0   | 0   | 0   | 0    |
| 1    | 3   | 3    | 2   | 0   | 5   | 1    |
| 0    | 0   | 10   | 0   | 3   | 1   | 0    |
| 0    | 0   | 0    | 0   | 0   | 0   | 0    |
| 0    | 0   | 0    | 0   | 0   | 0   | 4    |
| 0    | 0   | 0    | 1   | 0   | 0   | 0    |
| 0    | 0   | 2    | 0   | 1   | 0   | 1    |
| 0    | 0   | 7    | 0   | 1   | 1   | 0    |
| 0    | 0   | 0    | 0   | 0   | 0   | 0    |
| 0    | 0   | 0    | 1   | 0   | 0   | 0    |
| 0    | 0   | 0    | 0   | 0   | 0   | 0    |
| 0    | 0   | 0    | 0   | 0   | 0   | 1    |
| 0    | 0   | 0    | 0   | 0   | 0   | 0    |



|     |    |     |     |     |    |      |
|-----|----|-----|-----|-----|----|------|
| 0   | 0  | 0   | 0   | 0   | 0  | 0    |
| 452 | 75 | 966 | 129 | 121 | 38 | 544  |
| 26  | 14 | 145 | 23  | 14  | 14 | 34   |
| 27  | 5  | 278 | 11  | 13  | 2  | 51   |
| 88  | 4  | 83  | 8   | 32  | 1  | 0    |
| 64  | 4  | 24  | 14  | 15  | 2  | 146  |
| 11  | 1  | 62  | 6   | 4   | 0  | 107  |
| 0   | 0  | 0   | 1   | 3   | 0  | 9    |
| 13  | 0  | 2   | 0   | 0   | 1  | 8    |
| 24  | 28 | 27  | 6   | 3   | 12 | 31   |
| 1   | 1  | 0   | 3   | 1   | 0  | 0    |
| 4   | 12 | 2   | 1   | 0   | 1  | 0    |
| 0   | 0  | 0   | 0   | 0   | 0  | 2    |
| 0   | 0  | 0   | 0   | 0   | 0  | 0    |
| 0   | 0  | 1   | 3   | 0   | 0  | 0    |
| 0   | 0  | 0   | 0   | 1   | 0  | 0    |
| 11  | 2  | 13  | 4   | 0   | 0  | 19   |
| 0   | 1  | 4   | 1   | 0   | 0  | 0    |
| 2   | 1  | 2   | 0   | 1   | 0  | 0    |
| 1   | 0  | 0   | 0   | 0   | 0  | 2    |
| 1   | 0  | 2   | 1   | 0   | 0  | 0    |
| 2   | 0  | 0   | 1   | 0   | 0  | 1    |
| 1   | 0  | 6   | 2   | 0   | 0  | 1    |
| 0   | 3  | 0   | 0   | 0   | 1  | 0    |
| 0   | 0  | 0   | 0   | 0   | 0  | 0    |
| 0   | 0  | 3   | 1   | 0   | 1  | 2    |
| 0   | 0  | 0   | 1   | 0   | 0  | 0    |
| 1   | 0  | 0   | 0   | 0   | 0  | 0    |
| 1   | 0  | 0   | 0   | 0   | 0  | 0    |
| 0   | 0  | 0   | 0   | 0   | 0  | 0    |
| 0   | 0  | 0   | 0   | 0   | 0  | 0    |
| 0   | 0  | 0   | 0   | 0   | 0  | 0    |
| 0   | 0  | 0   | 0   | 0   | 0  | 0    |
| 0   | 0  | 0   | 0   | 0   | 0  | 0    |
| 0   | 0  | 0   | 0   | 0   | 0  | 0    |
| 0   | 0  | 1   | 0   | 0   | 0  | 0    |
| 0   | 0  | 0   | 0   | 0   | 0  | 0    |
| 397 | 22 | 60  | 97  | 23  | 4  | 1253 |
| 9   | 8  | 4   | 9   | 0   | 7  | 11   |
| 0   | 0  | 0   | 1   | 0   | 0  | 48   |
| 98  | 12 | 25  | 0   | 1   | 0  | 0    |
| 0   | 1  | 0   | 1   | 1   | 0  | 11   |
| 0   | 0  | 0   | 0   | 0   | 0  | 0    |
| 15  | 0  | 6   | 0   | 2   | 0  | 4    |
| 0   | 0  | 0   | 1   | 1   | 0  | 0    |
| 0   | 0  | 0   | 0   | 0   | 0  | 0    |
| 0   | 0  | 0   | 0   | 0   | 0  | 0    |
| 0   | 0  | 0   | 0   | 0   | 0  | 0    |
| 0   | 0  | 0   | 0   | 0   | 0  | 0    |
| 2   | 0  | 0   | 0   | 0   | 0  | 0    |

|    |    |     |    |    |    |     |
|----|----|-----|----|----|----|-----|
| 0  | 0  | 0   | 0  | 0  | 0  | 0   |
| 0  | 0  | 0   | 0  | 0  | 0  | 0   |
| 6  | 0  | 0   | 0  | 0  | 0  | 0   |
| 0  | 0  | 0   | 0  | 0  | 0  | 0   |
| 0  | 0  | 0   | 0  | 0  | 0  | 0   |
| 0  | 0  | 0   | 0  | 0  | 0  | 0   |
| 0  | 0  | 0   | 0  | 0  | 0  | 0   |
| 0  | 0  | 0   | 0  | 0  | 0  | 1   |
| 0  | 0  | 0   | 0  | 0  | 0  | 0   |
| 0  | 0  | 0   | 0  | 0  | 0  | 0   |
| 0  | 0  | 0   | 0  | 0  | 0  | 0   |
| 0  | 0  | 0   | 0  | 0  | 0  | 0   |
| 3  | 1  | 0   | 0  | 0  | 0  | 0   |
| 0  | 0  | 0   | 0  | 0  | 0  | 0   |
| 0  | 0  | 0   | 0  | 0  | 0  | 0   |
| 0  | 0  | 0   | 0  | 0  | 0  | 0   |
| 1  | 1  | 10  | 0  | 6  | 3  | 1   |
| 0  | 0  | 5   | 0  | 2  | 3  | 0   |
| 0  | 0  | 0   | 0  | 0  | 0  | 0   |
| 0  | 6  | 0   | 1  | 0  | 4  | 0   |
| 0  | 52 | 0   | 1  | 1  | 38 | 0   |
| 0  | 0  | 0   | 0  | 0  | 0  | 0   |
| 0  | 0  | 0   | 0  | 0  | 0  | 0   |
| 0  | 0  | 0   | 0  | 0  | 0  | 0   |
| 0  | 0  | 0   | 0  | 0  | 0  | 0   |
| 0  | 0  | 0   | 0  | 0  | 0  | 0   |
| 0  | 0  | 0   | 0  | 0  | 0  | 0   |
| 0  | 0  | 1   | 1  | 1  | 0  | 0   |
| 0  | 0  | 0   | 0  | 1  | 0  | 0   |
| 0  | 0  | 0   | 1  | 0  | 0  | 0   |
| 0  | 0  | 0   | 0  | 0  | 0  | 0   |
| 0  | 0  | 0   | 0  | 0  | 0  | 0   |
| 61 | 15 | 250 | 42 | 31 | 12 | 119 |
| 1  | 0  | 0   | 0  | 0  | 0  | 0   |
| 0  | 0  | 0   | 3  | 0  | 0  | 0   |
| 1  | 0  | 5   | 1  | 2  | 0  | 0   |
| 0  | 0  | 0   | 1  | 0  | 1  | 0   |
| 0  | 0  | 0   | 0  | 0  | 0  | 0   |
| 0  | 0  | 0   | 0  | 0  | 0  | 0   |
| 0  | 0  | 0   | 0  | 0  | 0  | 0   |
| 0  | 0  | 0   | 0  | 0  | 0  | 0   |
| 0  | 0  | 0   | 0  | 0  | 0  | 0   |
| 0  | 0  | 27  | 2  | 8  | 0  | 3   |
| 0  | 0  | 0   | 2  | 0  | 0  | 0   |
| 44 | 7  | 1   | 2  | 10 | 0  | 0   |
| 0  | 0  | 0   | 0  | 0  | 0  | 0   |
| 0  | 0  | 0   | 0  | 0  | 0  | 0   |
| 2  | 9  | 7   | 4  | 8  | 1  | 0   |



|     |      |    |     |    |     |    |
|-----|------|----|-----|----|-----|----|
| 0   | 8    | 0  | 2   | 0  | 11  | 0  |
| 0   | 0    | 0  | 0   | 0  | 0   | 0  |
| 0   | 0    | 0  | 0   | 0  | 0   | 0  |
| 28  | 11   | 0  | 26  | 0  | 14  | 0  |
| 1   | 0    | 0  | 5   | 0  | 0   | 0  |
| 0   | 1    | 0  | 0   | 0  | 0   | 0  |
| 30  | 136  | 11 | 0   | 4  | 15  | 50 |
| 0   | 0    | 0  | 0   | 0  | 0   | 0  |
| 0   | 3    | 1  | 0   | 1  | 3   | 0  |
| 0   | 0    | 0  | 0   | 0  | 0   | 0  |
| 0   | 0    | 0  | 0   | 0  | 0   | 0  |
| 0   | 0    | 0  | 0   | 0  | 0   | 2  |
| 1   | 2    | 0  | 2   | 0  | 5   | 0  |
| 0   | 0    | 0  | 0   | 0  | 0   | 0  |
| 121 | 1017 | 0  | 297 | 84 | 818 | 0  |
| 3   | 5    | 0  | 0   | 0  | 0   | 0  |
| 0   | 1    | 0  | 4   | 0  | 3   | 0  |
| 1   | 0    | 0  | 0   | 0  | 0   | 0  |
| 1   | 4    | 0  | 0   | 0  | 1   | 0  |
| 0   | 0    | 0  | 0   | 0  | 0   | 0  |
| 0   | 0    | 0  | 0   | 0  | 0   | 0  |
| 0   | 0    | 0  | 0   | 0  | 0   | 0  |
| 0   | 0    | 0  | 0   | 0  | 0   | 0  |
| 1   | 8    | 0  | 1   | 0  | 10  | 0  |
| 0   | 0    | 0  | 0   | 0  | 0   | 0  |
| 0   | 0    | 0  | 0   | 0  | 0   | 0  |
| 0   | 1    | 0  | 1   | 0  | 0   | 0  |
| 0   | 0    | 0  | 0   | 0  | 0   | 0  |



| 36.DCM | 38.SUR | 38.DCM | 39.SUR | 39.DCM | 41.SUR | 41.DCM |       |
|--------|--------|--------|--------|--------|--------|--------|-------|
| 0      | 0      | 0      | 0      | 0      | 0      | 0      | 0     |
| 0      | 0      | 0      | 0      | 0      | 0      | 0      | 0     |
| 0      | 0      | 0      | 0      | 0      | 0      | 0      | 0     |
| 0      | 0      | 0      | 0      | 0      | 0      | 0      | 1     |
| 0      | 0      | 0      | 0      | 0      | 0      | 0      | 0     |
| 0      | 0      | 0      | 0      | 0      | 0      | 0      | 0     |
| 0      | 0      | 0      | 0      | 0      | 0      | 0      | 0     |
| 0      | 0      | 0      | 1      | 0      | 0      | 0      | 35    |
| 0      | 0      | 0      | 3      | 0      | 0      | 0      | 7     |
| 0      | 0      | 0      | 0      | 0      | 0      | 0      | 414   |
| 0      | 0      | 0      | 0      | 0      | 0      | 0      | 0     |
| 0      | 0      | 0      | 0      | 0      | 0      | 0      | 1     |
| 0      | 0      | 0      | 0      | 0      | 0      | 0      | 0     |
| 0      | 0      | 0      | 0      | 0      | 0      | 0      | 0     |
| 0      | 0      | 0      | 0      | 0      | 0      | 0      | 0     |
| 0      | 0      | 0      | 0      | 0      | 0      | 0      | 0     |
| 0      | 0      | 0      | 17     | 0      | 0      | 0      | 10    |
| 254    | 55     | 97     | 0      | 0      | 822    | 194    | 526   |
| 2      | 5      | 0      | 0      | 0      | 532    | 0      | 2     |
| 35     | 1      | 0      | 0      | 0      | 0      | 2      | 3     |
| 0      | 0      | 0      | 0      | 0      | 0      | 0      | 0     |
| 0      | 0      | 0      | 0      | 0      | 0      | 0      | 0     |
| 0      | 0      | 0      | 0      | 0      | 0      | 0      | 0     |
| 0      | 0      | 0      | 0      | 0      | 0      | 0      | 0     |
| 0      | 0      | 0      | 0      | 0      | 0      | 0      | 0     |
| 0      | 0      | 0      | 0      | 0      | 0      | 0      | 0     |
| 0      | 0      | 0      | 0      | 0      | 0      | 6      | 0     |
| 0      | 0      | 0      | 0      | 0      | 0      | 0      | 0     |
| 0      | 0      | 0      | 0      | 0      | 0      | 3      | 0     |
| 1      | 1      | 0      | 0      | 0      | 3      | 0      | 3     |
| 0      | 0      | 5      | 0      | 0      | 0      | 0      | 0     |
| 0      | 0      | 0      | 0      | 0      | 0      | 0      | 0     |
| 0      | 0      | 31     | 0      | 0      | 0      | 0      | 8     |
| 0      | 0      | 0      | 0      | 0      | 0      | 0      | 5     |
| 0      | 0      | 0      | 0      | 0      | 0      | 0      | 16    |
| 0      | 0      | 0      | 0      | 0      | 0      | 0      | 0     |
| 2      | 29     | 23     | 1      | 1      | 0      | 2611   | 11885 |
| 1022   | 30     | 85     | 0      | 0      | 0      | 654    | 226   |
| 4      | 0      | 14     | 0      | 0      | 0      | 1115   | 517   |
| 0      | 0      | 0      | 0      | 0      | 0      | 0      | 0     |
| 0      | 0      | 0      | 0      | 0      | 0      | 0      | 0     |
| 0      | 0      | 0      | 0      | 0      | 0      | 0      | 0     |
| 34     | 6      | 56     | 0      | 0      | 0      | 1      | 7     |
| 4      | 0      | 0      | 0      | 0      | 0      | 4      | 37    |
| 2      | 0      | 2      | 0      | 0      | 0      | 1      | 4     |
| 0      | 0      | 0      | 0      | 0      | 0      | 0      | 0     |
| 0      | 0      | 5      | 0      | 0      | 0      | 2      | 8     |



|     |    |    |   |   |     |    |
|-----|----|----|---|---|-----|----|
| 0   | 0  | 0  | 0 | 0 | 0   | 0  |
| 0   | 0  | 0  | 0 | 0 | 0   | 0  |
| 0   | 0  | 0  | 0 | 0 | 0   | 0  |
| 24  | 0  | 0  | 0 | 0 | 4   | 0  |
| 0   | 0  | 0  | 0 | 0 | 0   | 0  |
| 0   | 0  | 8  | 0 | 0 | 0   | 1  |
| 0   | 0  | 0  | 0 | 0 | 0   | 0  |
| 0   | 0  | 0  | 0 | 0 | 0   | 0  |
| 0   | 0  | 0  | 0 | 0 | 0   | 0  |
| 0   | 0  | 0  | 0 | 0 | 0   | 0  |
| 0   | 0  | 0  | 0 | 0 | 0   | 0  |
| 0   | 0  | 0  | 0 | 0 | 0   | 0  |
| 0   | 0  | 0  | 0 | 0 | 0   | 0  |
| 0   | 0  | 0  | 0 | 0 | 0   | 0  |
| 0   | 0  | 0  | 0 | 0 | 0   | 0  |
| 911 | 19 | 75 | 0 | 0 | 108 | 0  |
| 0   | 0  | 0  | 0 | 0 | 0   | 0  |
| 0   | 0  | 0  | 0 | 0 | 8   | 2  |
| 0   | 0  | 0  | 0 | 0 | 0   | 0  |
| 0   | 0  | 0  | 0 | 0 | 28  | 4  |
| 0   | 0  | 0  | 0 | 0 | 0   | 0  |
| 0   | 0  | 0  | 0 | 0 | 1   | 0  |
| 0   | 0  | 0  | 0 | 0 | 0   | 2  |
| 0   | 0  | 0  | 0 | 0 | 0   | 0  |
| 0   | 0  | 0  | 1 | 0 | 0   | 0  |
| 13  | 0  | 0  | 0 | 0 | 1   | 0  |
| 0   | 0  | 2  | 0 | 0 | 1   | 2  |
| 4   | 0  | 2  | 0 | 0 | 7   | 2  |
| 0   | 0  | 0  | 0 | 0 | 0   | 0  |
| 0   | 0  | 0  | 0 | 0 | 0   | 0  |
| 0   | 0  | 0  | 0 | 0 | 0   | 1  |
| 0   | 0  | 0  | 0 | 0 | 0   | 0  |
| 0   | 0  | 0  | 0 | 0 | 0   | 0  |
| 0   | 0  | 0  | 0 | 0 | 0   | 0  |
| 0   | 0  | 0  | 0 | 0 | 0   | 0  |
| 0   | 0  | 1  | 0 | 0 | 0   | 0  |
| 1   | 0  | 0  | 0 | 0 | 0   | 17 |
| 0   | 0  | 0  | 0 | 0 | 0   | 0  |
| 0   | 0  | 0  | 0 | 0 | 0   | 0  |
| 0   | 16 | 1  | 0 | 0 | 0   | 0  |
| 0   | 0  | 0  | 0 | 0 | 0   | 0  |
| 0   | 0  | 0  | 0 | 0 | 0   | 0  |
| 0   | 0  | 0  | 0 | 0 | 0   | 0  |
| 0   | 0  | 0  | 0 | 0 | 0   | 0  |
| 0   | 0  | 34 | 0 | 0 | 0   | 0  |
| 0   | 0  | 0  | 0 | 0 | 1   | 0  |
| 0   | 0  | 0  | 0 | 0 | 0   | 0  |
| 0   | 0  | 0  | 0 | 0 | 0   | 0  |

|     |    |     |    |      |     |     |
|-----|----|-----|----|------|-----|-----|
| 0   | 0  | 0   | 0  | 0    | 0   | 0   |
| 0   | 0  | 1   | 0  | 0    | 0   | 0   |
| 67  | 7  | 29  | 0  | 0    | 6   | 56  |
| 0   | 0  | 74  | 0  | 0    | 0   | 0   |
| 2   | 0  | 0   | 0  | 0    | 0   | 15  |
| 0   | 0  | 0   | 0  | 0    | 0   | 0   |
| 0   | 0  | 0   | 0  | 0    | 0   | 0   |
| 0   | 0  | 0   | 0  | 0    | 0   | 0   |
| 0   | 0  | 0   | 0  | 0    | 0   | 0   |
| 0   | 0  | 55  | 0  | 0    | 0   | 0   |
| 3   | 0  | 6   | 0  | 0    | 0   | 11  |
| 0   | 0  | 0   | 0  | 0    | 0   | 0   |
| 16  | 0  | 2   | 0  | 1928 | 6   | 209 |
| 0   | 0  | 0   | 0  | 0    | 0   | 0   |
| 0   | 0  | 5   | 0  | 0    | 0   | 2   |
| 0   | 0  | 10  | 0  | 0    | 0   | 2   |
| 0   | 0  | 0   | 0  | 0    | 0   | 16  |
| 1   | 0  | 6   | 0  | 0    | 0   | 1   |
| 0   | 0  | 0   | 0  | 0    | 0   | 0   |
| 0   | 0  | 0   | 0  | 0    | 0   | 1   |
| 7   | 0  | 1   | 0  | 7    | 0   | 0   |
| 0   | 0  | 5   | 0  | 0    | 0   | 0   |
| 0   | 0  | 0   | 0  | 0    | 0   | 0   |
| 0   | 0  | 0   | 0  | 0    | 0   | 0   |
| 0   | 0  | 0   | 0  | 0    | 0   | 0   |
| 0   | 0  | 0   | 0  | 0    | 0   | 0   |
| 0   | 0  | 0   | 0  | 0    | 0   | 0   |
| 0   | 0  | 0   | 0  | 0    | 0   | 0   |
| 0   | 0  | 0   | 0  | 0    | 107 | 16  |
| 0   | 0  | 4   | 0  | 0    | 0   | 0   |
| 0   | 0  | 0   | 0  | 0    | 0   | 0   |
| 0   | 0  | 1   | 0  | 0    | 0   | 7   |
| 6   | 0  | 3   | 0  | 0    | 0   | 0   |
| 0   | 0  | 1   | 0  | 0    | 49  | 61  |
| 0   | 0  | 0   | 0  | 0    | 0   | 0   |
| 0   | 0  | 0   | 0  | 0    | 0   | 0   |
| 0   | 0  | 0   | 0  | 0    | 0   | 0   |
| 0   | 0  | 0   | 0  | 0    | 0   | 0   |
| 0   | 0  | 0   | 0  | 0    | 0   | 0   |
| 32  | 0  | 0   | 0  | 0    | 3   | 0   |
| 0   | 0  | 0   | 0  | 0    | 0   | 0   |
| 0   | 0  | 0   | 0  | 0    | 0   | 0   |
| 0   | 0  | 0   | 0  | 0    | 0   | 0   |
| 0   | 0  | 0   | 0  | 0    | 0   | 0   |
| 166 | 78 | 908 | 65 | 244  | 72  | 117 |
| 32  | 13 | 27  | 2  | 36   | 2   | 67  |
| 0   | 0  | 0   | 0  | 0    | 0   | 3   |
| 0   | 0  | 0   | 0  | 0    | 0   | 0   |
| 3   | 24 | 31  | 0  | 0    | 1   | 0   |
| 0   | 0  | 0   | 0  | 0    | 0   | 0   |

|     |     |     |   |    |     |     |
|-----|-----|-----|---|----|-----|-----|
| 0   | 0   | 0   | 0 | 0  | 0   | 0   |
| 0   | 0   | 0   | 0 | 0  | 0   | 0   |
| 0   | 0   | 0   | 0 | 0  | 0   | 0   |
| 0   | 16  | 90  | 0 | 0  | 0   | 0   |
| 0   | 0   | 0   | 0 | 0  | 0   | 0   |
| 0   | 0   | 0   | 0 | 0  | 0   | 8   |
| 0   | 0   | 0   | 0 | 0  | 0   | 0   |
| 0   | 0   | 0   | 0 | 0  | 0   | 0   |
| 0   | 0   | 0   | 3 | 1  | 0   | 0   |
| 0   | 0   | 0   | 0 | 0  | 0   | 0   |
| 4   | 2   | 3   | 1 | 1  | 0   | 0   |
| 0   | 0   | 0   | 0 | 0  | 0   | 0   |
| 0   | 0   | 0   | 0 | 0  | 0   | 0   |
| 1   | 2   | 0   | 0 | 3  | 3   | 1   |
| 0   | 0   | 0   | 0 | 0  | 0   | 0   |
| 0   | 0   | 0   | 0 | 0  | 0   | 0   |
| 0   | 0   | 0   | 0 | 0  | 0   | 0   |
| 0   | 0   | 0   | 0 | 0  | 0   | 0   |
| 0   | 0   | 0   | 0 | 0  | 0   | 0   |
| 0   | 0   | 4   | 0 | 2  | 0   | 2   |
| 0   | 0   | 0   | 0 | 0  | 0   | 0   |
| 8   | 0   | 2   | 0 | 0  | 0   | 7   |
| 0   | 0   | 0   | 0 | 0  | 0   | 0   |
| 199 | 211 | 291 | 0 | 15 | 745 | 81  |
| 4   | 0   | 0   | 0 | 0  | 0   | 0   |
| 2   | 0   | 0   | 0 | 0  | 0   | 0   |
| 0   | 0   | 0   | 0 | 0  | 0   | 0   |
| 0   | 0   | 3   | 0 | 0  | 0   | 0   |
| 0   | 0   | 0   | 0 | 0  | 0   | 0   |
| 0   | 0   | 0   | 0 | 0  | 0   | 0   |
| 0   | 0   | 0   | 0 | 0  | 0   | 0   |
| 0   | 0   | 0   | 0 | 0  | 0   | 0   |
| 0   | 0   | 0   | 0 | 0  | 0   | 0   |
| 0   | 0   | 0   | 0 | 0  | 0   | 0   |
| 0   | 0   | 0   | 0 | 0  | 0   | 0   |
| 0   | 0   | 2   | 0 | 0  | 0   | 0   |
| 40  | 27  | 40  | 3 | 76 | 111 | 108 |
| 0   | 3   | 0   | 0 | 2  | 2   | 3   |
| 0   | 0   | 0   | 2 | 0  | 5   | 0   |
| 37  | 0   | 3   | 4 | 1  | 1   | 24  |
| 0   | 0   | 0   | 0 | 0  | 0   | 0   |
| 0   | 0   | 0   | 0 | 0  | 0   | 0   |
| 0   | 0   | 0   | 0 | 0  | 0   | 0   |
| 0   | 0   | 0   | 0 | 0  | 0   | 0   |
| 0   | 0   | 0   | 0 | 0  | 0   | 0   |
| 0   | 0   | 1   | 0 | 0  | 0   | 0   |
| 1   | 0   | 0   | 0 | 0  | 0   | 0   |
| 0   | 0   | 0   | 0 | 0  | 0   | 0   |

|    |    |    |   |   |    |     |
|----|----|----|---|---|----|-----|
| 0  | 0  | 0  | 0 | 0 | 1  | 8   |
| 0  | 20 | 65 | 0 | 0 | 0  | 0   |
| 1  | 0  | 0  | 0 | 0 | 0  | 0   |
| 0  | 0  | 0  | 0 | 0 | 0  | 0   |
| 0  | 0  | 0  | 0 | 0 | 0  | 0   |
| 0  | 0  | 0  | 0 | 0 | 0  | 0   |
| 0  | 0  | 0  | 0 | 0 | 0  | 0   |
| 0  | 0  | 0  | 0 | 0 | 0  | 0   |
| 0  | 0  | 0  | 0 | 0 | 0  | 0   |
| 0  | 0  | 0  | 0 | 0 | 0  | 0   |
| 0  | 0  | 0  | 0 | 0 | 0  | 0   |
| 0  | 0  | 0  | 0 | 0 | 0  | 0   |
| 0  | 0  | 0  | 0 | 0 | 0  | 0   |
| 0  | 0  | 0  | 0 | 0 | 0  | 0   |
| 0  | 0  | 0  | 0 | 0 | 0  | 0   |
| 0  | 0  | 0  | 0 | 0 | 0  | 0   |
| 0  | 0  | 0  | 0 | 0 | 0  | 0   |
| 0  | 0  | 0  | 0 | 0 | 0  | 0   |
| 0  | 0  | 0  | 0 | 0 | 0  | 0   |
| 0  | 0  | 0  | 0 | 0 | 0  | 0   |
| 19 | 3  | 0  | 0 | 2 | 1  | 0   |
| 0  | 55 | 21 | 0 | 0 | 3  | 0   |
| 0  | 0  | 0  | 0 | 0 | 0  | 0   |
| 39 | 43 | 41 | 1 | 0 | 5  | 115 |
| 0  | 0  | 0  | 0 | 0 | 25 | 5   |
| 0  | 24 | 0  | 0 | 0 | 0  | 6   |
| 1  | 0  | 0  | 0 | 0 | 2  | 0   |
| 0  | 0  | 0  | 0 | 0 | 0  | 0   |
| 0  | 0  | 0  | 0 | 0 | 0  | 1   |
| 0  | 0  | 0  | 0 | 0 | 0  | 0   |
| 0  | 0  | 0  | 0 | 0 | 0  | 0   |
| 0  | 0  | 3  | 0 | 0 | 0  | 0   |
| 0  | 0  | 0  | 0 | 0 | 0  | 0   |
| 0  | 0  | 0  | 0 | 0 | 0  | 0   |
| 0  | 0  | 0  | 0 | 0 | 0  | 0   |
| 0  | 0  | 0  | 0 | 0 | 0  | 0   |
| 0  | 0  | 0  | 0 | 0 | 0  | 0   |
| 0  | 0  | 2  | 0 | 0 | 0  | 4   |
| 0  | 0  | 1  | 0 | 0 | 0  | 0   |
| 0  | 0  | 0  | 0 | 0 | 0  | 0   |
| 0  | 0  | 0  | 0 | 0 | 0  | 0   |
| 0  | 0  | 0  | 0 | 0 | 0  | 0   |
| 0  | 0  | 0  | 0 | 0 | 0  | 0   |
| 0  | 0  | 0  | 0 | 0 | 0  | 0   |
| 0  | 0  | 0  | 0 | 0 | 0  | 0   |
| 0  | 0  | 0  | 0 | 0 | 0  | 0   |
| 2  | 0  | 0  | 0 | 3 | 0  | 0   |
| 0  | 0  | 0  | 0 | 0 | 0  | 0   |
| 0  | 0  | 0  | 0 | 0 | 0  | 0   |

|      |      |      |      |      |      |      |
|------|------|------|------|------|------|------|
| 0    | 0    | 0    | 0    | 0    | 0    | 0    |
| 0    | 0    | 0    | 0    | 0    | 0    | 0    |
| 0    | 0    | 0    | 0    | 0    | 0    | 0    |
| 23   | 1    | 9    | 5698 | 58   | 319  | 32   |
| 0    | 0    | 75   | 0    | 0    | 0    | 2    |
| 0    | 0    | 2    | 0    | 0    | 0    | 0    |
| 455  | 38   | 218  | 15   | 19   | 23   | 90   |
| 0    | 0    | 0    | 41   | 35   | 0    | 0    |
| 2    | 0    | 0    | 16   | 8    | 0    | 3    |
| 0    | 0    | 13   | 0    | 0    | 0    | 0    |
| 0    | 2    | 0    | 0    | 1    | 0    | 0    |
| 8789 | 1307 | 2401 | 6    | 6321 | 4007 | 3033 |
| 64   | 34   | 0    | 0    | 0    | 9    | 7    |
| 4    | 70   | 106  | 0    | 0    | 1    | 264  |
| 5    | 0    | 44   | 1    | 0    | 1    | 283  |
| 300  | 12   | 85   | 0    | 0    | 30   | 135  |
| 84   | 11   | 78   | 0    | 1    | 10   | 132  |
| 0    | 1    | 0    | 0    | 0    | 0    | 14   |
| 0    | 1    | 29   | 0    | 0    | 0    | 72   |
| 0    | 0    | 52   | 0    | 0    | 0    | 317  |
| 0    | 0    | 0    | 1    | 0    | 0    | 79   |
| 27   | 0    | 0    | 0    | 0    | 6    | 92   |
| 0    | 235  | 715  | 0    | 0    | 0    | 24   |
| 0    | 0    | 0    | 0    | 0    | 0    | 9    |
| 0    | 0    | 0    | 0    | 0    | 0    | 0    |
| 0    | 0    | 0    | 0    | 0    | 0    | 0    |
| 0    | 299  | 583  | 0    | 0    | 0    | 0    |
| 0    | 0    | 0    | 0    | 0    | 0    | 0    |
| 0    | 0    | 0    | 0    | 0    | 0    | 0    |
| 7    | 0    | 1    | 0    | 0    | 0    | 19   |
| 0    | 0    | 0    | 0    | 0    | 0    | 10   |
| 0    | 0    | 0    | 0    | 0    | 0    | 0    |
| 2    | 0    | 0    | 0    | 0    | 0    | 0    |
| 0    | 0    | 0    | 0    | 0    | 0    | 0    |
| 0    | 184  | 281  | 0    | 0    | 0    | 0    |
| 0    | 0    | 0    | 0    | 0    | 0    | 0    |
| 245  | 41   | 62   | 1    | 438  | 44   | 32   |
| 0    | 0    | 0    | 0    | 0    | 0    | 0    |
| 0    | 0    | 0    | 0    | 0    | 0    | 0    |
| 0    | 0    | 0    | 0    | 0    | 0    | 3    |
| 0    | 0    | 0    | 0    | 0    | 0    | 0    |
| 0    | 0    | 0    | 0    | 0    | 0    | 10   |
| 30   | 0    | 0    | 0    | 0    | 5    | 22   |
| 0    | 0    | 0    | 0    | 0    | 0    | 0    |
| 0    | 0    | 0    | 0    | 0    | 0    | 0    |
| 0    | 2    | 1    | 0    | 0    | 0    | 0    |
| 0    | 0    | 0    | 0    | 0    | 0    | 14   |
| 0    | 0    | 0    | 0    | 0    | 0    | 0    |

|    |   |    |   |    |    |    |
|----|---|----|---|----|----|----|
| 0  | 0 | 0  | 0 | 0  | 0  | 0  |
| 8  | 1 | 1  | 0 | 8  | 0  | 1  |
| 0  | 0 | 0  | 0 | 0  | 0  | 0  |
| 0  | 0 | 0  | 0 | 0  | 0  | 1  |
| 0  | 0 | 0  | 0 | 0  | 0  | 0  |
| 0  | 0 | 0  | 0 | 0  | 0  | 0  |
| 2  | 0 | 0  | 0 | 0  | 0  | 2  |
| 0  | 0 | 0  | 0 | 0  | 0  | 0  |
| 0  | 0 | 0  | 0 | 0  | 0  | 4  |
| 0  | 0 | 0  | 0 | 0  | 0  | 0  |
| 0  | 0 | 0  | 0 | 0  | 0  | 0  |
| 1  | 0 | 0  | 0 | 1  | 0  | 0  |
| 0  | 0 | 0  | 1 | 0  | 0  | 0  |
| 0  | 0 | 0  | 0 | 0  | 0  | 3  |
| 0  | 0 | 0  | 0 | 0  | 0  | 0  |
| 0  | 0 | 0  | 0 | 0  | 0  | 0  |
| 0  | 0 | 0  | 0 | 0  | 0  | 0  |
| 0  | 0 | 0  | 0 | 0  | 12 | 5  |
| 0  | 0 | 0  | 0 | 0  | 0  | 0  |
| 0  | 0 | 0  | 0 | 0  | 0  | 0  |
| 37 | 1 | 25 | 0 | 0  | 4  | 22 |
| 0  | 0 | 0  | 0 | 0  | 0  | 0  |
| 0  | 0 | 0  | 0 | 0  | 0  | 0  |
| 0  | 0 | 0  | 0 | 0  | 0  | 0  |
| 5  | 0 | 1  | 0 | 0  | 2  | 0  |
| 0  | 0 | 0  | 0 | 0  | 0  | 0  |
| 0  | 0 | 0  | 0 | 0  | 0  | 0  |
| 2  | 0 | 0  | 0 | 0  | 0  | 0  |
| 0  | 0 | 0  | 0 | 0  | 0  | 0  |
| 3  | 0 | 5  | 0 | 0  | 0  | 4  |
| 9  | 0 | 0  | 0 | 4  | 0  | 0  |
| 2  | 2 | 2  | 0 | 3  | 1  | 1  |
| 15 | 7 | 4  | 0 | 18 | 0  | 0  |
| 0  | 0 | 0  | 0 | 0  | 0  | 0  |
| 1  | 0 | 0  | 0 | 0  | 0  | 2  |
| 1  | 0 | 0  | 0 | 0  | 0  | 4  |
| 0  | 0 | 0  | 0 | 0  | 0  | 0  |
| 0  | 0 | 0  | 0 | 0  | 0  | 0  |
| 0  | 0 | 1  | 0 | 0  | 0  | 2  |
| 4  | 0 | 1  | 0 | 0  | 0  | 0  |
| 0  | 0 | 0  | 0 | 0  | 0  | 0  |
| 0  | 0 | 0  | 0 | 0  | 0  | 0  |
| 0  | 0 | 0  | 0 | 0  | 0  | 0  |
| 0  | 0 | 0  | 0 | 0  | 0  | 0  |
| 0  | 0 | 0  | 0 | 0  | 0  | 0  |
| 0  | 0 | 0  | 0 | 0  | 0  | 0  |
| 0  | 0 | 0  | 0 | 0  | 0  | 0  |
| 0  | 0 | 0  | 1 | 0  | 0  | 0  |



|    |   |    |   |    |   |     |
|----|---|----|---|----|---|-----|
| 2  | 0 | 6  | 0 | 0  | 4 | 2   |
| 4  | 1 | 0  | 0 | 3  | 0 | 0   |
| 0  | 0 | 0  | 0 | 0  | 0 | 0   |
| 0  | 0 | 0  | 0 | 0  | 0 | 0   |
| 4  | 0 | 0  | 0 | 0  | 1 | 0   |
| 3  | 0 | 0  | 0 | 0  | 0 | 0   |
| 0  | 0 | 0  | 0 | 0  | 0 | 0   |
| 1  | 0 | 0  | 0 | 0  | 0 | 0   |
| 0  | 0 | 0  | 0 | 0  | 0 | 0   |
| 7  | 5 | 0  | 0 | 10 | 0 | 2   |
| 0  | 0 | 0  | 0 | 0  | 0 | 0   |
| 0  | 0 | 0  | 0 | 0  | 0 | 0   |
| 0  | 0 | 0  | 0 | 0  | 0 | 0   |
| 0  | 0 | 0  | 0 | 0  | 0 | 0   |
| 0  | 0 | 0  | 0 | 0  | 0 | 0   |
| 0  | 0 | 0  | 0 | 0  | 0 | 0   |
| 0  | 0 | 0  | 0 | 0  | 0 | 0   |
| 5  | 0 | 0  | 0 | 0  | 1 | 0   |
| 0  | 0 | 0  | 0 | 0  | 0 | 0   |
| 0  | 0 | 0  | 0 | 0  | 0 | 0   |
| 0  | 0 | 0  | 0 | 0  | 0 | 0   |
| 0  | 0 | 0  | 0 | 0  | 0 | 0   |
| 0  | 0 | 0  | 0 | 0  | 3 | 0   |
| 1  | 1 | 1  | 0 | 2  | 2 | 0   |
| 0  | 0 | 0  | 0 | 0  | 0 | 1   |
| 0  | 0 | 0  | 0 | 0  | 0 | 0   |
| 0  | 0 | 0  | 0 | 0  | 0 | 0   |
| 0  | 4 | 6  | 0 | 0  | 0 | 0   |
| 0  | 0 | 0  | 0 | 1  | 0 | 92  |
| 0  | 0 | 0  | 0 | 0  | 0 | 39  |
| 7  | 0 | 9  | 0 | 0  | 1 | 32  |
| 0  | 0 | 0  | 0 | 0  | 0 | 0   |
| 0  | 0 | 0  | 0 | 0  | 0 | 0   |
| 0  | 0 | 0  | 0 | 0  | 0 | 0   |
| 0  | 0 | 16 | 0 | 0  | 0 | 59  |
| 0  | 0 | 0  | 0 | 0  | 0 | 119 |
| 0  | 1 | 0  | 7 | 1  | 0 | 36  |
| 0  | 0 | 1  | 0 | 0  | 0 | 30  |
| 0  | 0 | 0  | 0 | 0  | 0 | 0   |
| 0  | 0 | 0  | 0 | 0  | 0 | 0   |
| 0  | 0 | 0  | 0 | 0  | 0 | 1   |
| 58 | 0 | 0  | 0 | 0  | 8 | 0   |
| 0  | 0 | 0  | 0 | 0  | 0 | 1   |
| 1  | 0 | 1  | 0 | 0  | 1 | 0   |
| 0  | 0 | 0  | 0 | 0  | 0 | 0   |
| 0  | 0 | 0  | 0 | 0  | 0 | 0   |
| 0  | 0 | 0  | 0 | 0  | 0 | 0   |

|    |     |     |   |    |      |     |
|----|-----|-----|---|----|------|-----|
| 0  | 0   | 12  | 0 | 0  | 0    | 21  |
| 0  | 0   | 0   | 1 | 0  | 0    | 0   |
| 0  | 0   | 0   | 0 | 0  | 0    | 0   |
| 18 | 6   | 0   | 0 | 28 | 0    | 21  |
| 0  | 0   | 0   | 0 | 0  | 0    | 6   |
| 0  | 0   | 0   | 0 | 0  | 0    | 0   |
| 5  | 58  | 2   | 0 | 0  | 1378 | 467 |
| 0  | 161 | 270 | 0 | 0  | 0    | 12  |
| 3  | 0   | 13  | 1 | 0  | 1    | 149 |
| 0  | 0   | 0   | 0 | 0  | 0    | 21  |
| 0  | 0   | 1   | 0 | 0  | 0    | 16  |
| 0  | 0   | 1   | 0 | 0  | 0    | 16  |
| 0  | 0   | 0   | 0 | 0  | 0    | 9   |
| 0  | 0   | 0   | 0 | 0  | 0    | 0   |
| 0  | 0   | 0   | 0 | 0  | 0    | 4   |
| 0  | 0   | 0   | 0 | 0  | 0    | 0   |
| 0  | 0   | 0   | 0 | 0  | 0    | 0   |
| 0  | 0   | 0   | 0 | 0  | 0    | 0   |
| 0  | 4   | 3   | 2 | 0  | 0    | 25  |
| 0  | 0   | 0   | 0 | 0  | 0    | 0   |
| 0  | 0   | 0   | 0 | 0  | 0    | 0   |
| 0  | 0   | 0   | 0 | 0  | 0    | 20  |
| 0  | 0   | 0   | 0 | 0  | 0    | 5   |
| 0  | 0   | 0   | 0 | 0  | 0    | 0   |
| 0  | 0   | 14  | 0 | 0  | 0    | 0   |
| 0  | 0   | 0   | 0 | 0  | 0    | 0   |
| 11 | 0   | 1   | 0 | 0  | 7    | 3   |
| 0  | 0   | 0   | 0 | 0  | 0    | 0   |
| 0  | 0   | 0   | 0 | 0  | 0    | 0   |
| 0  | 0   | 0   | 0 | 0  | 0    | 0   |
| 0  | 0   | 0   | 0 | 0  | 0    | 1   |
| 0  | 0   | 0   | 0 | 0  | 0    | 0   |
| 14 | 0   | 0   | 0 | 0  | 1    | 4   |
| 0  | 0   | 0   | 0 | 0  | 0    | 3   |
| 0  | 0   | 0   | 0 | 0  | 0    | 0   |
| 0  | 0   | 0   | 0 | 0  | 0    | 0   |
| 0  | 1   | 0   | 0 | 1  | 0    | 1   |
| 0  | 0   | 0   | 0 | 0  | 0    | 0   |
| 0  | 0   | 0   | 0 | 0  | 0    | 0   |
| 1  | 0   | 0   | 0 | 0  | 0    | 0   |
| 0  | 0   | 0   | 0 | 0  | 0    | 4   |
| 0  | 0   | 0   | 0 | 0  | 0    | 0   |
| 0  | 0   | 3   | 0 | 0  | 0    | 9   |
| 1  | 0   | 1   | 0 | 0  | 0    | 8   |
| 0  | 0   | 0   | 0 | 0  | 0    | 0   |
| 0  | 0   | 0   | 0 | 0  | 0    | 0   |
| 0  | 0   | 0   | 0 | 0  | 0    | 0   |

|     |    |     |    |     |     |      |
|-----|----|-----|----|-----|-----|------|
| 0   | 0  | 0   | 0  | 0   | 0   | 0    |
| 0   | 0  | 0   | 0  | 0   | 0   | 0    |
| 23  | 51 | 37  | 0  | 4   | 4   | 0    |
| 0   | 0  | 0   | 0  | 0   | 0   | 0    |
| 0   | 0  | 0   | 0  | 0   | 0   | 0    |
| 0   | 0  | 0   | 0  | 0   | 0   | 0    |
| 0   | 0  | 0   | 0  | 0   | 0   | 0    |
| 0   | 0  | 0   | 0  | 0   | 0   | 0    |
| 0   | 0  | 0   | 0  | 0   | 0   | 0    |
| 0   | 0  | 1   | 0  | 0   | 0   | 0    |
| 0   | 0  | 0   | 0  | 0   | 0   | 0    |
| 0   | 0  | 0   | 0  | 0   | 0   | 0    |
| 1   | 4  | 0   | 0  | 0   | 0   | 1    |
| 0   | 0  | 0   | 0  | 0   | 0   | 0    |
| 0   | 0  | 0   | 0  | 0   | 0   | 0    |
| 0   | 0  | 0   | 0  | 0   | 0   | 0    |
| 0   | 0  | 0   | 0  | 0   | 0   | 1    |
| 0   | 0  | 5   | 0  | 0   | 0   | 0    |
| 3   | 0  | 0   | 0  | 0   | 0   | 0    |
| 0   | 6  | 0   | 0  | 0   | 0   | 17   |
| 0   | 0  | 0   | 0  | 0   | 0   | 0    |
| 0   | 0  | 0   | 0  | 0   | 84  | 61   |
| 0   | 0  | 0   | 0  | 0   | 0   | 0    |
| 9   | 0  | 0   | 0  | 0   | 0   | 4    |
| 0   | 0  | 0   | 0  | 0   | 0   | 0    |
| 0   | 0  | 0   | 0  | 0   | 0   | 0    |
| 0   | 0  | 80  | 0  | 0   | 0   | 2    |
| 0   | 0  | 0   | 0  | 0   | 0   | 0    |
| 0   | 0  | 0   | 0  | 0   | 2   | 0    |
| 0   | 0  | 0   | 0  | 0   | 0   | 0    |
| 117 | 12 | 1   | 0  | 0   | 8   | 10   |
| 0   | 0  | 0   | 0  | 0   | 0   | 0    |
| 0   | 0  | 0   | 0  | 0   | 0   | 0    |
| 0   | 0  | 0   | 0  | 0   | 0   | 0    |
| 0   | 0  | 0   | 0  | 0   | 0   | 0    |
| 0   | 0  | 0   | 0  | 0   | 0   | 0    |
| 0   | 0  | 0   | 0  | 0   | 0   | 0    |
| 0   | 0  | 0   | 0  | 0   | 0   | 0    |
| 0   | 0  | 0   | 0  | 0   | 0   | 0    |
| 0   | 0  | 0   | 0  | 0   | 0   | 0    |
| 0   | 0  | 0   | 0  | 0   | 0   | 0    |
| 0   | 0  | 0   | 0  | 0   | 0   | 0    |
| 0   | 0  | 0   | 0  | 0   | 0   | 0    |
| 5   | 1  | 2   | 0  | 0   | 52  | 10   |
| 0   | 0  | 0   | 0  | 0   | 0   | 0    |
| 0   | 0  | 0   | 0  | 0   | 0   | 0    |
| 657 | 44 | 356 | 2  | 3   | 222 | 227  |
| 6   | 0  | 76  | 0  | 0   | 28  | 86   |
| 628 | 88 | 167 | 76 | 116 | 374 | 1382 |
| 31  | 38 | 67  | 20 | 121 | 308 | 369  |
| 17  | 14 | 6   | 3  | 0   | 43  | 39   |







|     |    |      |   |     |    |    |
|-----|----|------|---|-----|----|----|
| 0   | 0  | 0    | 0 | 0   | 0  | 0  |
| 46  | 18 | 39   | 1 | 1   | 17 | 32 |
| 124 | 35 | 28   | 0 | 2   | 28 | 31 |
| 10  | 9  | 19   | 0 | 0   | 17 | 9  |
| 5   | 1  | 1    | 0 | 0   | 1  | 0  |
| 0   | 0  | 0    | 0 | 0   | 0  | 0  |
| 34  | 1  | 3    | 0 | 0   | 3  | 3  |
| 0   | 1  | 0    | 0 | 0   | 0  | 0  |
| 0   | 0  | 0    | 0 | 0   | 0  | 0  |
| 0   | 2  | 7    | 0 | 0   | 5  | 3  |
| 0   | 0  | 0    | 0 | 0   | 0  | 0  |
| 0   | 0  | 0    | 0 | 0   | 0  | 0  |
| 0   | 0  | 0    | 0 | 0   | 0  | 0  |
| 16  | 0  | 0    | 0 | 0   | 0  | 0  |
| 1   | 0  | 0    | 0 | 0   | 6  | 3  |
| 0   | 0  | 0    | 0 | 0   | 0  | 0  |
| 0   | 0  | 0    | 0 | 0   | 0  | 2  |
| 0   | 0  | 0    | 0 | 0   | 0  | 0  |
| 0   | 0  | 0    | 0 | 0   | 0  | 0  |
| 0   | 0  | 0    | 0 | 0   | 0  | 0  |
| 0   | 0  | 0    | 0 | 0   | 0  | 1  |
| 0   | 0  | 0    | 0 | 0   | 0  | 0  |
| 0   | 0  | 0    | 0 | 0   | 0  | 0  |
| 0   | 0  | 0    | 0 | 0   | 0  | 1  |
| 0   | 0  | 1    | 0 | 0   | 0  | 0  |
| 0   | 0  | 0    | 0 | 0   | 0  | 0  |
| 0   | 0  | 0    | 0 | 0   | 0  | 0  |
| 0   | 0  | 0    | 0 | 0   | 0  | 0  |
| 0   | 0  | 0    | 0 | 0   | 0  | 0  |
| 0   | 0  | 0    | 0 | 0   | 0  | 0  |
| 0   | 0  | 0    | 0 | 0   | 0  | 0  |
| 6   | 1  | 3    | 0 | 0   | 0  | 0  |
| 0   | 0  | 0    | 0 | 0   | 0  | 0  |
| 0   | 46 | 1311 | 0 | 0   | 0  | 13 |
| 235 | 39 | 96   | 0 | 1   | 37 | 11 |
| 0   | 0  | 20   | 0 | 0   | 36 | 21 |
| 0   | 1  | 17   | 1 | 0   | 0  | 22 |
| 43  | 24 | 20   | 0 | 1   | 3  | 12 |
| 13  | 27 | 13   | 0 | 491 | 0  | 0  |
| 0   | 6  | 0    | 0 | 0   | 0  | 12 |
| 27  | 0  | 3    | 0 | 0   | 8  | 5  |
| 0   | 0  | 0    | 0 | 0   | 3  | 4  |
| 28  | 2  | 13   | 0 | 0   | 1  | 2  |
| 0   | 0  | 0    | 0 | 0   | 0  | 96 |
| 0   | 0  | 20   | 0 | 0   | 0  | 3  |
| 23  | 0  | 6    | 0 | 0   | 2  | 0  |
| 31  | 4  | 0    | 0 | 0   | 1  | 0  |
| 0   | 16 | 3    | 0 | 0   | 0  | 0  |
| 1   | 0  | 0    | 0 | 0   | 0  | 0  |





|     |    |      |     |      |      |     |
|-----|----|------|-----|------|------|-----|
| 65  | 34 | 712  | 25  | 26   | 39   | 716 |
| 16  | 30 | 46   | 4   | 0    | 5    | 36  |
| 0   | 0  | 0    | 0   | 0    | 0    | 0   |
| 0   | 0  | 0    | 0   | 0    | 929  | 53  |
| 0   | 1  | 2    | 0   | 0    | 2    | 1   |
| 0   | 0  | 1    | 0   | 0    | 0    | 0   |
| 0   | 0  | 0    | 0   | 0    | 0    | 0   |
| 0   | 0  | 0    | 0   | 0    | 0    | 0   |
| 0   | 0  | 0    | 0   | 0    | 0    | 0   |
| 0   | 0  | 0    | 0   | 0    | 0    | 0   |
| 0   | 0  | 0    | 0   | 0    | 0    | 0   |
| 0   | 0  | 0    | 0   | 0    | 0    | 0   |
| 4   | 14 | 3    | 0   | 0    | 0    | 7   |
| 0   | 2  | 5    | 0   | 0    | 0    | 817 |
| 0   | 1  | 0    | 0   | 0    | 22   | 33  |
| 0   | 0  | 0    | 0   | 0    | 0    | 0   |
| 0   | 0  | 0    | 0   | 0    | 0    | 6   |
| 0   | 0  | 0    | 0   | 0    | 0    | 0   |
| 0   | 0  | 0    | 0   | 0    | 0    | 0   |
| 0   | 1  | 0    | 0   | 0    | 103  | 36  |
| 0   | 0  | 0    | 0   | 0    | 16   | 10  |
| 0   | 0  | 0    | 0   | 0    | 0    | 0   |
| 0   | 0  | 0    | 0   | 0    | 0    | 0   |
| 0   | 0  | 0    | 0   | 0    | 0    | 0   |
| 74  | 41 | 89   | 367 | 226  | 1089 | 208 |
| 0   | 0  | 0    | 0   | 0    | 0    | 0   |
| 0   | 0  | 0    | 0   | 0    | 0    | 0   |
| 0   | 64 | 1301 | 0   | 2    | 9522 | 354 |
| 0   | 1  | 4    | 0   | 1875 | 1    | 0   |
| 15  | 57 | 2    | 2   | 5    | 211  | 82  |
| 110 | 13 | 11   | 1   | 6    | 98   | 9   |
| 0   | 13 | 0    | 0   | 0    | 0    | 21  |
| 2   | 3  | 3    | 0   | 1    | 5    | 22  |
| 0   | 0  | 0    | 0   | 4    | 60   | 13  |
| 0   | 1  | 0    | 0   | 0    | 26   | 30  |
| 0   | 0  | 0    | 0   | 0    | 5    | 4   |
| 13  | 0  | 0    | 8   | 1    | 38   | 9   |
| 0   | 0  | 0    | 0   | 0    | 0    | 0   |
| 0   | 0  | 13   | 0   | 0    | 9    | 0   |
| 0   | 0  | 0    | 0   | 0    | 0    | 0   |
| 0   | 0  | 0    | 0   | 0    | 0    | 0   |
| 0   | 0  | 0    | 0   | 0    | 0    | 0   |
| 0   | 0  | 0    | 0   | 0    | 0    | 0   |
| 0   | 1  | 0    | 0   | 0    | 3967 | 264 |
| 127 | 84 | 92   | 140 | 89   | 607  | 306 |
| 0   | 0  | 0    | 0   | 0    | 0    | 0   |
| 0   | 0  | 0    | 0   | 0    | 47   | 6   |
| 0   | 1  | 0    | 0   | 0    | 12   | 0   |

|     |     |     |     |     |      |     |
|-----|-----|-----|-----|-----|------|-----|
| 0   | 0   | 0   | 0   | 0   | 3    | 0   |
| 0   | 0   | 0   | 0   | 0   | 31   | 1   |
| 1   | 0   | 0   | 0   | 0   | 44   | 1   |
| 0   | 0   | 0   | 0   | 0   | 61   | 3   |
| 0   | 0   | 0   | 0   | 0   | 6    | 2   |
| 0   | 0   | 0   | 0   | 0   | 0    | 0   |
| 0   | 0   | 0   | 0   | 0   | 0    | 0   |
| 0   | 0   | 0   | 0   | 0   | 0    | 0   |
| 0   | 0   | 0   | 0   | 0   | 4    | 2   |
| 0   | 0   | 1   | 1   | 0   | 0    | 72  |
| 0   | 0   | 0   | 0   | 0   | 0    | 3   |
| 0   | 0   | 0   | 0   | 0   | 1    | 1   |
| 0   | 0   | 0   | 0   | 0   | 0    | 5   |
| 0   | 0   | 0   | 0   | 0   | 0    | 0   |
| 0   | 0   | 0   | 0   | 0   | 0    | 0   |
| 2   | 141 | 66  | 263 | 140 | 2422 | 401 |
| 0   | 4   | 36  | 0   | 0   | 1    | 325 |
| 0   | 2   | 0   | 6   | 6   | 11   | 2   |
| 0   | 0   | 0   | 0   | 0   | 0    | 0   |
| 0   | 0   | 0   | 0   | 0   | 5    | 0   |
| 0   | 0   | 0   | 0   | 0   | 6    | 0   |
| 0   | 0   | 0   | 0   | 0   | 0    | 0   |
| 0   | 0   | 0   | 0   | 0   | 0    | 0   |
| 0   | 0   | 0   | 0   | 0   | 17   | 1   |
| 0   | 1   | 0   | 3   | 3   | 7    | 2   |
| 0   | 2   | 0   | 0   | 0   | 2    | 0   |
| 0   | 0   | 0   | 1   | 0   | 0    | 0   |
| 10  | 10  | 8   | 10  | 0   | 1016 | 63  |
| 211 | 169 | 39  | 54  | 24  | 173  | 59  |
| 30  | 0   | 2   | 218 | 62  | 142  | 129 |
| 3   | 0   | 0   | 3   | 2   | 21   | 43  |
| 181 | 16  | 1   | 0   | 3   | 17   | 14  |
| 0   | 0   | 0   | 0   | 0   | 124  | 9   |
| 0   | 0   | 0   | 0   | 0   | 31   | 8   |
| 0   | 0   | 0   | 0   | 0   | 41   | 3   |
| 0   | 0   | 0   | 0   | 0   | 0    | 0   |
| 0   | 0   | 0   | 0   | 0   | 0    | 0   |
| 108 | 92  | 351 | 38  | 34  | 10   | 175 |
| 1   | 1   | 106 | 24  | 17  | 1    | 88  |
| 1   | 0   | 17  | 0   | 0   | 0    | 213 |
| 0   | 0   | 0   | 0   | 0   | 0    | 264 |
| 1   | 0   | 13  | 0   | 1   | 2    | 99  |
| 0   | 0   | 0   | 0   | 0   | 0    | 0   |
| 0   | 0   | 0   | 0   | 0   | 0    | 0   |
| 0   | 0   | 1   | 0   | 0   | 0    | 0   |
| 0   | 0   | 0   | 0   | 0   | 0    | 2   |
| 0   | 0   | 0   | 0   | 0   | 0    | 0   |



|     |      |      |   |    |     |     |
|-----|------|------|---|----|-----|-----|
| 0   | 0    | 0    | 0 | 0  | 0   | 0   |
| 0   | 0    | 0    | 0 | 0  | 0   | 0   |
| 475 | 149  | 201  | 5 | 11 | 511 | 391 |
| 22  | 176  | 0    | 0 | 5  | 220 | 92  |
| 364 | 194  | 132  | 2 | 4  | 365 | 207 |
| 15  | 3174 | 5043 | 1 | 0  | 0   | 38  |
| 328 | 39   | 82   | 0 | 0  | 83  | 107 |
| 13  | 12   | 104  | 2 | 0  | 3   | 192 |
| 10  | 0    | 5    | 0 | 0  | 1   | 15  |
| 295 | 3    | 4    | 1 | 5  | 70  | 33  |
| 322 | 7    | 7    | 1 | 0  | 34  | 48  |
| 0   | 0    | 114  | 0 | 0  | 0   | 53  |
| 498 | 7    | 30   | 0 | 0  | 43  | 4   |
| 6   | 18   | 28   | 0 | 0  | 1   | 30  |
| 43  | 7    | 80   | 5 | 4  | 28  | 19  |
| 7   | 0    | 5    | 0 | 0  | 0   | 14  |
| 73  | 0    | 7    | 0 | 0  | 15  | 36  |
| 22  | 3    | 48   | 0 | 0  | 3   | 79  |
| 63  | 0    | 26   | 0 | 1  | 12  | 62  |
| 0   | 3    | 8    | 0 | 0  | 0   | 2   |
| 0   | 0    | 0    | 0 | 0  | 0   | 4   |
| 1   | 0    | 0    | 0 | 0  | 0   | 0   |
| 0   | 1    | 5    | 0 | 0  | 0   | 36  |
| 0   | 0    | 18   | 0 | 0  | 0   | 0   |
| 38  | 0    | 11   | 0 | 0  | 8   | 1   |
| 362 | 5    | 33   | 0 | 0  | 46  | 6   |
| 0   | 0    | 0    | 1 | 0  | 0   | 5   |
| 0   | 0    | 135  | 0 | 1  | 0   | 0   |
| 0   | 0    | 0    | 0 | 0  | 0   | 7   |
| 0   | 0    | 0    | 0 | 0  | 0   | 0   |
| 0   | 0    | 0    | 0 | 0  | 0   | 8   |
| 0   | 0    | 0    | 0 | 0  | 0   | 0   |
| 0   | 0    | 0    | 0 | 0  | 0   | 0   |
| 0   | 1    | 19   | 0 | 0  | 0   | 0   |
| 0   | 0    | 34   | 0 | 0  | 0   | 52  |
| 0   | 0    | 0    | 0 | 0  | 0   | 0   |
| 0   | 0    | 0    | 0 | 0  | 0   | 6   |
| 0   | 0    | 5    | 0 | 0  | 0   | 2   |
| 2   | 0    | 1    | 0 | 0  | 3   | 0   |
| 0   | 0    | 0    | 0 | 0  | 0   | 0   |
| 0   | 0    | 0    | 0 | 0  | 0   | 0   |
| 0   | 0    | 0    | 0 | 0  | 0   | 0   |
| 1   | 0    | 0    | 0 | 0  | 3   | 2   |
| 0   | 1    | 0    | 0 | 0  | 0   | 5   |
| 0   | 0    | 0    | 0 | 0  | 0   | 0   |
| 0   | 0    | 15   | 0 | 0  | 0   | 0   |
| 0   | 0    | 0    | 0 | 0  | 0   | 0   |
| 0   | 0    | 0    | 0 | 0  | 0   | 0   |



|      |      |     |   |     |     |     |
|------|------|-----|---|-----|-----|-----|
| 0    | 0    | 0   | 0 | 0   | 0   | 0   |
| 0    | 0    | 0   | 0 | 0   | 0   | 6   |
| 0    | 0    | 0   | 0 | 0   | 0   | 0   |
| 42   | 0    | 3   | 0 | 0   | 2   | 8   |
| 0    | 0    | 0   | 0 | 0   | 2   | 0   |
| 1    | 0    | 2   | 0 | 0   | 6   | 7   |
| 0    | 0    | 0   | 0 | 0   | 0   | 0   |
| 0    | 0    | 0   | 0 | 0   | 0   | 0   |
| 52   | 8    | 80  | 0 | 397 | 17  | 73  |
| 2551 | 1116 | 732 | 2 | 150 | 741 | 559 |
| 0    | 16   | 3   | 0 | 0   | 0   | 5   |
| 0    | 8    | 17  | 0 | 0   | 46  | 15  |
| 200  | 75   | 12  | 0 | 1   | 113 | 84  |
| 20   | 10   | 3   | 0 | 0   | 3   | 4   |
| 0    | 0    | 57  | 0 | 0   | 1   | 0   |
| 7    | 2    | 1   | 0 | 0   | 0   | 2   |
| 0    | 0    | 0   | 0 | 0   | 184 | 26  |
| 0    | 2    | 1   | 0 | 0   | 7   | 10  |
| 64   | 0    | 1   | 0 | 0   | 9   | 2   |
| 1    | 1    | 2   | 0 | 0   | 1   | 3   |
| 0    | 0    | 0   | 0 | 0   | 8   | 2   |
| 8    | 0    | 1   | 0 | 0   | 0   | 7   |
| 2    | 0    | 9   | 0 | 0   | 4   | 11  |
| 0    | 0    | 0   | 0 | 0   | 0   | 2   |
| 0    | 0    | 0   | 0 | 0   | 0   | 0   |
| 0    | 1    | 2   | 0 | 0   | 0   | 7   |
| 4    | 0    | 0   | 0 | 0   | 0   | 3   |
| 13   | 2    | 12  | 0 | 0   | 1   | 2   |
| 2    | 0    | 6   | 0 | 0   | 0   | 0   |
| 0    | 0    | 0   | 0 | 0   | 0   | 0   |
| 0    | 1    | 1   | 0 | 0   | 0   | 0   |
| 0    | 0    | 0   | 0 | 0   | 0   | 0   |
| 0    | 2    | 0   | 0 | 0   | 0   | 1   |
| 4    | 1    | 0   | 0 | 0   | 0   | 0   |
| 22   | 0    | 1   | 0 | 0   | 5   | 0   |
| 0    | 0    | 0   | 0 | 0   | 0   | 0   |
| 1    | 0    | 1   | 0 | 0   | 0   | 0   |
| 1    | 1    | 1   | 0 | 0   | 5   | 0   |
| 0    | 0    | 0   | 0 | 0   | 0   | 0   |
| 0    | 0    | 0   | 0 | 0   | 0   | 0   |
| 0    | 0    | 0   | 0 | 0   | 0   | 0   |
| 7    | 1    | 0   | 0 | 0   | 0   | 0   |
| 0    | 0    | 1   | 0 | 0   | 0   | 1   |
| 0    | 0    | 0   | 0 | 0   | 0   | 0   |
| 0    | 0    | 1   | 0 | 0   | 0   | 0   |
| 0    | 0    | 0   | 0 | 0   | 0   | 0   |
| 1    | 1    | 0   | 0 | 0   | 0   | 0   |
| 0    | 0    | 0   | 0 | 0   | 0   | 0   |



|       |     |    |    |    |      |     |
|-------|-----|----|----|----|------|-----|
| 0     | 0   | 0  | 0  | 0  | 0    | 0   |
| 877   | 47  | 37 | 2  | 1  | 348  | 163 |
| 47    | 49  | 83 | 0  | 0  | 18   | 22  |
| 54    | 4   | 2  | 0  | 0  | 17   | 5   |
| 0     | 24  | 29 | 0  | 0  | 31   | 19  |
| 268   | 34  | 14 | 0  | 0  | 71   | 77  |
| 65    | 2   | 0  | 2  | 0  | 46   | 3   |
| 17    | 20  | 4  | 0  | 0  | 6    | 2   |
| 7     | 2   | 0  | 0  | 0  | 0    | 11  |
| 49    | 6   | 15 | 0  | 0  | 31   | 29  |
| 0     | 0   | 0  | 0  | 0  | 0    | 4   |
| 4     | 0   | 0  | 0  | 0  | 1    | 5   |
| 5     | 0   | 0  | 0  | 0  | 5    | 1   |
| 0     | 0   | 0  | 0  | 0  | 0    | 0   |
| 4     | 0   | 0  | 0  | 0  | 3    | 1   |
| 0     | 0   | 0  | 0  | 0  | 0    | 0   |
| 36    | 16  | 7  | 0  | 0  | 14   | 6   |
| 2     | 0   | 1  | 0  | 0  | 2    | 0   |
| 0     | 0   | 0  | 0  | 0  | 0    | 0   |
| 2     | 0   | 0  | 0  | 0  | 1    | 0   |
| 0     | 0   | 2  | 0  | 0  | 0    | 0   |
| 5     | 0   | 1  | 0  | 0  | 0    | 2   |
| 0     | 0   | 0  | 0  | 0  | 1    | 0   |
| 0     | 0   | 0  | 0  | 0  | 0    | 0   |
| 0     | 0   | 0  | 0  | 0  | 0    | 0   |
| 7     | 0   | 1  | 0  | 0  | 1    | 0   |
| 0     | 0   | 0  | 0  | 0  | 0    | 0   |
| 1     | 0   | 0  | 0  | 0  | 0    | 0   |
| 0     | 0   | 0  | 0  | 0  | 0    | 0   |
| 0     | 0   | 0  | 0  | 0  | 0    | 0   |
| 4     | 0   | 0  | 0  | 0  | 0    | 0   |
| 0     | 0   | 0  | 0  | 0  | 0    | 1   |
| 0     | 0   | 0  | 0  | 0  | 0    | 0   |
| 0     | 0   | 0  | 0  | 0  | 0    | 0   |
| 1     | 0   | 0  | 0  | 0  | 0    | 0   |
| 0     | 0   | 0  | 0  | 0  | 0    | 0   |
| 58389 | 175 | 76 | 14 | 22 | 7273 | 201 |
| 10    | 0   | 3  | 0  | 0  | 3    | 1   |
| 14    | 1   | 0  | 7  | 4  | 91   | 16  |
| 0     | 0   | 0  | 0  | 0  | 2    | 0   |
| 24    | 0   | 1  | 0  | 0  | 7    | 11  |
| 0     | 0   | 0  | 0  | 0  | 0    | 0   |
| 12    | 0   | 0  | 0  | 0  | 32   | 0   |
| 1     | 0   | 0  | 0  | 0  | 0    | 0   |
| 110   | 0   | 0  | 0  | 0  | 16   | 0   |
| 0     | 0   | 0  | 0  | 0  | 1    | 0   |
| 6     | 0   | 0  | 0  | 0  | 0    | 0   |
| 0     | 0   | 0  | 0  | 0  | 0    | 0   |









| 42.SUR | 42.DCM | 44.SUR | 45.SUR | 48.SUR | 52.SUR | 52.DCM |    |
|--------|--------|--------|--------|--------|--------|--------|----|
| 0      | 0      | 0      | 0      | 0      | 0      | 0      | 0  |
| 0      | 0      | 0      | 0      | 0      | 0      | 0      | 0  |
| 0      | 2      | 0      | 0      | 0      | 0      | 0      | 0  |
| 0      | 0      | 0      | 0      | 0      | 0      | 0      | 0  |
| 0      | 1      | 0      | 0      | 0      | 0      | 0      | 0  |
| 0      | 0      | 0      | 0      | 0      | 0      | 0      | 0  |
| 0      | 0      | 0      | 0      | 0      | 0      | 0      | 0  |
| 0      | 54     | 0      | 0      | 0      | 0      | 0      | 11 |
| 0      | 10     | 0      | 0      | 0      | 0      | 0      | 11 |
| 0      | 0      | 0      | 0      | 0      | 0      | 0      | 0  |
| 0      | 0      | 0      | 0      | 0      | 0      | 0      | 0  |
| 0      | 0      | 0      | 0      | 0      | 0      | 0      | 1  |
| 0      | 0      | 0      | 0      | 0      | 0      | 0      | 0  |
| 0      | 0      | 0      | 0      | 0      | 0      | 0      | 0  |
| 0      | 2      | 0      | 0      | 0      | 0      | 0      | 4  |
| 0      | 0      | 0      | 0      | 0      | 0      | 0      | 1  |
| 0      | 62     | 0      | 0      | 0      | 0      | 0      | 25 |
| 310    | 659    | 34     | 673    | 213    | 158    | 285    |    |
| 2      | 4      | 1      | 1      | 1      | 1      | 1      | 0  |
| 0      | 3      | 29     | 21     | 20     | 4      | 4      | 0  |
| 0      | 3      | 0      | 0      | 0      | 0      | 0      | 0  |
| 0      | 0      | 19     | 0      | 0      | 2      | 2      | 1  |
| 0      | 0      | 0      | 0      | 0      | 0      | 0      | 0  |
| 0      | 0      | 0      | 0      | 0      | 0      | 0      | 0  |
| 0      | 1      | 0      | 0      | 0      | 0      | 0      | 0  |
| 0      | 0      | 0      | 0      | 0      | 0      | 0      | 0  |
| 1      | 0      | 0      | 0      | 0      | 0      | 0      | 0  |
| 0      | 0      | 0      | 0      | 0      | 0      | 0      | 0  |
| 0      | 0      | 0      | 0      | 0      | 0      | 0      | 0  |
| 0      | 3      | 0      | 0      | 0      | 0      | 0      | 0  |
| 0      | 0      | 0      | 0      | 0      | 0      | 0      | 0  |
| 0      | 0      | 0      | 0      | 0      | 0      | 0      | 0  |
| 0      | 3      | 0      | 0      | 0      | 0      | 0      | 8  |
| 0      | 0      | 0      | 0      | 0      | 0      | 0      | 1  |
| 1      | 2      | 0      | 0      | 0      | 0      | 0      | 14 |
| 0      | 0      | 0      | 0      | 0      | 0      | 0      | 0  |
| 64878  | 1190   | 36261  | 4006   | 47187  | 2878   | 1208   |    |
| 362    | 411    | 121    | 853    | 403    | 534    | 154    |    |
| 614    | 155    | 395    | 197    | 306    | 148    | 209    |    |
| 0      | 0      | 0      | 0      | 0      | 0      | 0      | 0  |
| 0      | 13     | 0      | 0      | 0      | 0      | 0      | 20 |
| 0      | 0      | 2      | 0      | 0      | 0      | 0      | 4  |
| 2      | 49     | 0      | 0      | 0      | 2      | 2      | 5  |
| 0      | 54     | 0      | 0      | 0      | 7      | 7      | 9  |
| 0      | 8      | 0      | 0      | 0      | 0      | 0      | 10 |
| 0      | 11     | 0      | 0      | 0      | 0      | 0      | 10 |
| 0      | 20     | 0      | 0      | 0      | 1      | 1      | 9  |

|    |      |    |    |    |    |     |
|----|------|----|----|----|----|-----|
| 0  | 0    | 0  | 0  | 0  | 0  | 0   |
| 0  | 17   | 0  | 0  | 0  | 0  | 11  |
| 3  | 19   | 0  | 0  | 0  | 0  | 7   |
| 1  | 33   | 0  | 0  | 1  | 0  | 41  |
| 0  | 7    | 0  | 0  | 0  | 0  | 11  |
| 0  | 19   | 0  | 0  | 0  | 0  | 1   |
| 0  | 13   | 0  | 0  | 0  | 0  | 10  |
| 6  | 1    | 6  | 56 | 11 | 1  | 0   |
| 1  | 0    | 0  | 0  | 0  | 1  | 1   |
| 0  | 0    | 0  | 0  | 0  | 0  | 0   |
| 0  | 0    | 0  | 0  | 0  | 0  | 0   |
| 0  | 2    | 0  | 0  | 0  | 0  | 1   |
| 0  | 3    | 0  | 0  | 0  | 0  | 0   |
| 0  | 0    | 0  | 0  | 0  | 0  | 8   |
| 0  | 18   | 0  | 0  | 0  | 0  | 1   |
| 0  | 0    | 0  | 0  | 0  | 0  | 0   |
| 0  | 0    | 0  | 0  | 0  | 0  | 0   |
| 0  | 0    | 0  | 0  | 0  | 0  | 0   |
| 0  | 0    | 0  | 0  | 0  | 0  | 0   |
| 0  | 0    | 0  | 0  | 0  | 0  | 0   |
| 0  | 0    | 0  | 0  | 0  | 0  | 0   |
| 0  | 0    | 3  | 1  | 7  | 0  | 0   |
| 3  | 0    | 10 | 0  | 2  | 0  | 1   |
| 6  | 1    | 2  | 1  | 4  | 0  | 0   |
| 0  | 0    | 0  | 0  | 0  | 0  | 0   |
| 0  | 0    | 0  | 0  | 0  | 0  | 0   |
| 0  | 0    | 0  | 3  | 0  | 0  | 0   |
| 0  | 0    | 0  | 0  | 0  | 0  | 0   |
| 6  | 0    | 0  | 0  | 1  | 0  | 0   |
| 0  | 3    | 0  | 0  | 0  | 0  | 3   |
| 1  | 1    | 0  | 0  | 0  | 0  | 0   |
| 0  | 2    | 0  | 0  | 0  | 0  | 9   |
| 0  | 0    | 0  | 0  | 0  | 0  | 3   |
| 0  | 0    | 0  | 0  | 0  | 0  | 0   |
| 0  | 0    | 0  | 1  | 0  | 0  | 0   |
| 0  | 0    | 0  | 0  | 0  | 0  | 20  |
| 0  | 0    | 9  | 4  | 0  | 0  | 0   |
| 0  | 1    | 0  | 0  | 0  | 0  | 0   |
| 0  | 0    | 0  | 0  | 0  | 0  | 0   |
| 17 | 1958 | 3  | 13 | 1  | 42 | 375 |
| 0  | 12   | 0  | 1  | 0  | 0  | 0   |
| 0  | 19   | 2  | 1  | 7  | 0  | 1   |
| 0  | 12   | 0  | 0  | 0  | 0  | 19  |
| 0  | 1    | 6  | 0  | 0  | 0  | 1   |
| 0  | 3    | 0  | 0  | 0  | 0  | 0   |
| 0  | 2    | 0  | 0  | 0  | 0  | 0   |
| 0  | 0    | 0  | 0  | 0  | 0  | 0   |
| 0  | 0    | 0  | 0  | 0  | 0  | 0   |

|    |     |    |    |    |   |    |
|----|-----|----|----|----|---|----|
| 0  | 0   | 0  | 0  | 0  | 0 | 0  |
| 0  | 0   | 0  | 0  | 0  | 0 | 0  |
| 0  | 0   | 0  | 0  | 0  | 0 | 0  |
| 0  | 0   | 0  | 0  | 0  | 0 | 0  |
| 0  | 0   | 0  | 0  | 0  | 0 | 0  |
| 2  | 4   | 1  | 3  | 0  | 0 | 1  |
| 0  | 0   | 0  | 0  | 0  | 0 | 0  |
| 0  | 0   | 0  | 0  | 0  | 0 | 0  |
| 0  | 0   | 0  | 0  | 0  | 0 | 0  |
| 0  | 0   | 0  | 0  | 0  | 0 | 0  |
| 0  | 0   | 0  | 0  | 0  | 0 | 0  |
| 0  | 0   | 0  | 0  | 0  | 0 | 0  |
| 0  | 0   | 0  | 0  | 0  | 0 | 0  |
| 0  | 0   | 0  | 0  | 0  | 0 | 0  |
| 0  | 0   | 0  | 0  | 0  | 0 | 0  |
| 0  | 1   | 0  | 0  | 0  | 0 | 0  |
| 0  | 0   | 0  | 0  | 0  | 0 | 1  |
| 13 | 0   | 8  | 33 | 3  | 0 | 0  |
| 0  | 0   | 0  | 0  | 0  | 0 | 0  |
| 0  | 1   | 2  | 1  | 2  | 0 | 0  |
| 0  | 0   | 0  | 0  | 0  | 0 | 0  |
| 0  | 0   | 0  | 0  | 0  | 0 | 0  |
| 1  | 3   | 0  | 0  | 0  | 0 | 0  |
| 1  | 3   | 0  | 0  | 0  | 0 | 0  |
| 0  | 0   | 0  | 0  | 0  | 0 | 0  |
| 0  | 7   | 6  | 0  | 3  | 0 | 2  |
| 3  | 1   | 1  | 4  | 4  | 1 | 4  |
| 24 | 1   | 51 | 0  | 44 | 0 | 1  |
| 0  | 0   | 0  | 3  | 0  | 0 | 0  |
| 0  | 3   | 0  | 0  | 0  | 0 | 0  |
| 0  | 0   | 0  | 0  | 0  | 0 | 0  |
| 0  | 0   | 0  | 0  | 0  | 0 | 0  |
| 0  | 0   | 0  | 0  | 0  | 0 | 0  |
| 0  | 5   | 0  | 0  | 0  | 0 | 0  |
| 0  | 20  | 0  | 0  | 0  | 0 | 2  |
| 0  | 1   | 0  | 0  | 0  | 0 | 14 |
| 0  | 4   | 28 | 0  | 0  | 0 | 0  |
| 0  | 8   | 0  | 0  | 0  | 0 | 0  |
| 0  | 0   | 0  | 0  | 0  | 0 | 0  |
| 0  | 3   | 0  | 0  | 0  | 0 | 1  |
| 0  | 0   | 0  | 0  | 0  | 0 | 0  |
| 0  | 15  | 0  | 0  | 0  | 0 | 0  |
| 0  | 5   | 0  | 0  | 0  | 0 | 0  |
| 0  | 0   | 0  | 0  | 0  | 0 | 0  |
| 37 | 0   | 0  | 1  | 0  | 0 | 0  |
| 3  | 301 | 0  | 41 | 0  | 0 | 0  |
| 0  | 0   | 0  | 0  | 0  | 0 | 0  |
| 0  | 0   | 0  | 0  | 0  | 0 | 0  |

|     |     |    |     |   |     |      |
|-----|-----|----|-----|---|-----|------|
| 0   | 11  | 0  | 0   | 0 | 0   | 0    |
| 0   | 0   | 0  | 0   | 0 | 0   | 0    |
| 3   | 251 | 0  | 2   | 0 | 36  | 83   |
| 0   | 0   | 0  | 0   | 0 | 1   | 0    |
| 0   | 8   | 0  | 0   | 0 | 0   | 0    |
| 0   | 0   | 0  | 0   | 0 | 0   | 0    |
| 0   | 0   | 0  | 0   | 0 | 0   | 0    |
| 0   | 0   | 0  | 0   | 0 | 0   | 0    |
| 0   | 0   | 0  | 0   | 0 | 0   | 0    |
| 0   | 0   | 0  | 0   | 0 | 0   | 0    |
| 0   | 5   | 0  | 0   | 0 | 0   | 9    |
| 0   | 1   | 0  | 0   | 0 | 0   | 0    |
| 13  | 275 | 0  | 0   | 0 | 2   | 89   |
| 0   | 0   | 0  | 0   | 0 | 0   | 0    |
| 0   | 24  | 0  | 0   | 0 | 1   | 16   |
| 5   | 147 | 0  | 0   | 2 | 0   | 17   |
| 0   | 14  | 0  | 0   | 0 | 0   | 4    |
| 0   | 23  | 0  | 0   | 0 | 0   | 3    |
| 0   | 0   | 0  | 0   | 0 | 0   | 0    |
| 0   | 1   | 0  | 0   | 0 | 0   | 1    |
| 0   | 0   | 0  | 0   | 0 | 1   | 0    |
| 0   | 0   | 0  | 0   | 0 | 0   | 0    |
| 0   | 0   | 0  | 0   | 0 | 0   | 0    |
| 0   | 0   | 0  | 0   | 0 | 0   | 0    |
| 0   | 0   | 0  | 0   | 0 | 0   | 0    |
| 0   | 0   | 0  | 0   | 0 | 0   | 0    |
| 0   | 0   | 0  | 0   | 0 | 0   | 0    |
| 0   | 0   | 0  | 0   | 0 | 0   | 0    |
| 0   | 0   | 0  | 0   | 0 | 0   | 0    |
| 1   | 0   | 33 | 0   | 0 | 0   | 0    |
| 0   | 0   | 0  | 0   | 0 | 0   | 3    |
| 0   | 2   | 0  | 0   | 0 | 0   | 0    |
| 9   | 0   | 0  | 35  | 0 | 0   | 0    |
| 0   | 28  | 0  | 0   | 0 | 0   | 2    |
| 2   | 4   | 0  | 1   | 2 | 0   | 0    |
| 0   | 1   | 0  | 0   | 0 | 0   | 2    |
| 0   | 0   | 0  | 0   | 0 | 0   | 0    |
| 0   | 0   | 0  | 0   | 0 | 0   | 0    |
| 0   | 0   | 0  | 0   | 0 | 0   | 0    |
| 0   | 0   | 0  | 0   | 0 | 0   | 0    |
| 0   | 0   | 0  | 0   | 0 | 0   | 0    |
| 0   | 0   | 0  | 0   | 0 | 0   | 0    |
| 0   | 1   | 0  | 0   | 0 | 0   | 0    |
| 0   | 0   | 0  | 0   | 0 | 0   | 0    |
| 0   | 0   | 0  | 0   | 0 | 0   | 0    |
| 542 | 179 | 36 | 123 | 2 | 459 | 1770 |
| 5   | 863 | 0  | 0   | 0 | 1   | 20   |
| 0   | 4   | 0  | 0   | 0 | 0   | 16   |
| 0   | 0   | 0  | 0   | 0 | 0   | 0    |
| 0   | 2   | 0  | 2   | 0 | 4   | 14   |
| 0   | 0   | 0  | 0   | 0 | 0   | 0    |

|     |     |     |      |    |      |      |
|-----|-----|-----|------|----|------|------|
| 0   | 0   | 0   | 0    | 0  | 0    | 0    |
| 0   | 0   | 0   | 0    | 0  | 0    | 0    |
| 0   | 0   | 0   | 0    | 2  | 11   | 0    |
| 0   | 0   | 0   | 0    | 0  | 0    | 0    |
| 0   | 0   | 0   | 0    | 0  | 0    | 0    |
| 1   | 0   | 0   | 0    | 0  | 0    | 3    |
| 1   | 0   | 0   | 0    | 0  | 0    | 0    |
| 0   | 0   | 0   | 0    | 0  | 0    | 0    |
| 0   | 0   | 0   | 0    | 0  | 0    | 0    |
| 0   | 0   | 2   | 0    | 0  | 0    | 0    |
| 0   | 0   | 0   | 0    | 0  | 0    | 0    |
| 0   | 0   | 0   | 0    | 0  | 0    | 0    |
| 0   | 0   | 0   | 0    | 0  | 0    | 0    |
| 0   | 0   | 0   | 2    | 0  | 0    | 0    |
| 0   | 0   | 0   | 0    | 0  | 0    | 0    |
| 0   | 0   | 0   | 0    | 0  | 0    | 0    |
| 0   | 0   | 0   | 0    | 0  | 0    | 0    |
| 0   | 0   | 0   | 0    | 0  | 0    | 0    |
| 0   | 0   | 1   | 3    | 0  | 1    | 0    |
| 0   | 12  | 0   | 0    | 0  | 0    | 0    |
| 0   | 0   | 0   | 0    | 0  | 2    | 9    |
| 0   | 2   | 0   | 0    | 0  | 0    | 0    |
| 0   | 0   | 0   | 0    | 0  | 0    | 0    |
| 316 | 669 | 301 | 1608 | 2  | 1717 | 1855 |
| 0   | 5   | 16  | 69   | 1  | 9    | 10   |
| 0   | 0   | 0   | 0    | 0  | 0    | 0    |
| 0   | 0   | 0   | 0    | 0  | 0    | 0    |
| 2   | 7   | 0   | 1    | 0  | 4    | 3    |
| 0   | 0   | 0   | 0    | 0  | 0    | 0    |
| 0   | 0   | 0   | 0    | 0  | 0    | 0    |
| 0   | 0   | 0   | 0    | 0  | 0    | 0    |
| 0   | 0   | 0   | 1    | 0  | 0    | 0    |
| 0   | 0   | 0   | 0    | 0  | 0    | 0    |
| 0   | 0   | 0   | 1    | 0  | 0    | 0    |
| 0   | 0   | 0   | 0    | 0  | 0    | 0    |
| 0   | 0   | 0   | 2    | 0  | 0    | 3    |
| 24  | 76  | 124 | 459  | 21 | 92   | 91   |
| 0   | 4   | 4   | 31   | 0  | 12   | 12   |
| 0   | 0   | 24  | 1    | 1  | 9    | 0    |
| 0   | 8   | 39  | 2    | 7  | 2    | 5    |
| 0   | 156 | 0   | 0    | 0  | 0    | 7    |
| 0   | 0   | 0   | 0    | 0  | 0    | 0    |
| 0   | 0   | 0   | 0    | 0  | 0    | 0    |
| 0   | 0   | 0   | 0    | 0  | 0    | 0    |
| 0   | 0   | 0   | 0    | 0  | 11   | 2    |
| 0   | 0   | 0   | 0    | 0  | 0    | 0    |
| 0   | 0   | 0   | 0    | 0  | 0    | 0    |
| 0   | 0   | 0   | 0    | 0  | 0    | 1    |



|    |     |    |     |    |    |     |
|----|-----|----|-----|----|----|-----|
| 0  | 1   | 0  | 0   | 0  | 0  | 3   |
| 0  | 0   | 0  | 0   | 0  | 0  | 0   |
| 0  | 0   | 0  | 0   | 0  | 0  | 0   |
| 0  | 0   | 0  | 0   | 0  | 0  | 0   |
| 0  | 0   | 0  | 0   | 0  | 0  | 0   |
| 0  | 0   | 0  | 0   | 0  | 0  | 0   |
| 0  | 0   | 0  | 0   | 0  | 0  | 0   |
| 0  | 0   | 0  | 0   | 0  | 0  | 0   |
| 0  | 0   | 0  | 0   | 0  | 0  | 0   |
| 0  | 0   | 0  | 0   | 0  | 0  | 0   |
| 0  | 0   | 0  | 0   | 0  | 0  | 0   |
| 0  | 6   | 0  | 0   | 0  | 0  | 0   |
| 0  | 0   | 0  | 0   | 0  | 0  | 0   |
| 0  | 0   | 0  | 0   | 0  | 0  | 0   |
| 0  | 0   | 0  | 0   | 0  | 0  | 0   |
| 0  | 0   | 0  | 0   | 0  | 0  | 0   |
| 0  | 0   | 0  | 0   | 0  | 0  | 0   |
| 0  | 0   | 0  | 0   | 0  | 0  | 0   |
| 0  | 0   | 7  | 0   | 3  | 2  | 0   |
| 0  | 0   | 0  | 0   | 0  | 0  | 0   |
| 0  | 0   | 2  | 316 | 36 | 30 | 4   |
| 0  | 0   | 0  | 0   | 0  | 0  | 0   |
| 5  | 4   | 3  | 3   | 2  | 2  | 3   |
| 0  | 3   | 0  | 0   | 0  | 0  | 0   |
| 73 | 415 | 0  | 1   | 0  | 29 | 124 |
| 0  | 4   | 16 | 0   | 3  | 0  | 0   |
| 16 | 4   | 0  | 0   | 0  | 1  | 2   |
| 0  | 0   | 0  | 1   | 2  | 1  | 0   |
| 0  | 0   | 0  | 0   | 0  | 0  | 10  |
| 0  | 0   | 0  | 0   | 0  | 1  | 1   |
| 0  | 0   | 0  | 0   | 0  | 0  | 0   |
| 0  | 0   | 0  | 0   | 0  | 0  | 0   |
| 0  | 0   | 0  | 0   | 0  | 0  | 0   |
| 0  | 0   | 0  | 0   | 0  | 0  | 0   |
| 0  | 17  | 0  | 0   | 0  | 0  | 6   |
| 0  | 1   | 0  | 0   | 0  | 0  | 0   |
| 0  | 0   | 0  | 0   | 0  | 0  | 0   |
| 0  | 0   | 1  | 0   | 0  | 0  | 0   |
| 0  | 0   | 0  | 0   | 0  | 0  | 0   |
| 0  | 0   | 0  | 0   | 0  | 0  | 0   |
| 0  | 0   | 0  | 0   | 0  | 0  | 0   |
| 0  | 3   | 0  | 0   | 0  | 0  | 1   |
| 0  | 7   | 0  | 0   | 0  | 0  | 0   |
| 0  | 0   | 0  | 0   | 0  | 0  | 0   |
| 0  | 0   | 0  | 0   | 0  | 0  | 0   |
| 0  | 0   | 0  | 0   | 0  | 0  | 0   |
| 0  | 0   | 0  | 0   | 0  | 0  | 0   |
| 0  | 0   | 0  | 0   | 0  | 0  | 0   |
| 0  | 0   | 0  | 0   | 0  | 0  | 0   |
| 0  | 0   | 0  | 0   | 0  | 0  | 0   |
| 0  | 0   | 0  | 0   | 0  | 0  | 0   |
| 0  | 0   | 0  | 0   | 0  | 0  | 0   |
| 0  | 11  | 0  | 0   | 0  | 0  | 0   |
| 0  | 0   | 0  | 0   | 0  | 0  | 0   |

|      |      |      |      |      |      |      |
|------|------|------|------|------|------|------|
| 0    | 4    | 0    | 0    | 0    | 0    | 0    |
| 0    | 0    | 0    | 0    | 0    | 0    | 0    |
| 0    | 0    | 0    | 0    | 0    | 0    | 0    |
| 12   | 2    | 1    | 70   | 0    | 350  | 83   |
| 0    | 7    | 0    | 0    | 0    | 0    | 0    |
| 1    | 0    | 0    | 0    | 0    | 0    | 0    |
| 0    | 3    | 0    | 0    | 1    | 627  | 71   |
| 0    | 0    | 0    | 0    | 0    | 0    | 0    |
| 0    | 1    | 0    | 0    | 0    | 0    | 0    |
| 0    | 0    | 0    | 0    | 0    | 0    | 0    |
| 7    | 0    | 0    | 0    | 0    | 1    | 0    |
| 2481 | 5410 | 1779 | 9030 | 4757 | 1272 | 1772 |
| 1    | 22   | 1    | 1    | 0    | 155  | 63   |
| 6    | 892  | 0    | 0    | 0    | 46   | 207  |
| 10   | 1165 | 1    | 5    | 4    | 6    | 74   |
| 3    | 446  | 7    | 4    | 6    | 94   | 125  |
| 21   | 177  | 5    | 18   | 6    | 18   | 15   |
| 4    | 21   | 0    | 0    | 0    | 0    | 0    |
| 14   | 301  | 8    | 18   | 0    | 41   | 64   |
| 14   | 439  | 0    | 0    | 0    | 2    | 157  |
| 0    | 116  | 0    | 0    | 0    | 0    | 35   |
| 8    | 125  | 0    | 0    | 0    | 35   | 125  |
| 1    | 12   | 0    | 0    | 0    | 0    | 0    |
| 0    | 141  | 0    | 0    | 0    | 0    | 52   |
| 0    | 1    | 0    | 2    | 0    | 0    | 95   |
| 4    | 0    | 0    | 0    | 0    | 0    | 0    |
| 0    | 0    | 0    | 0    | 0    | 0    | 0    |
| 0    | 4    | 0    | 0    | 0    | 0    | 13   |
| 0    | 0    | 0    | 1    | 0    | 0    | 0    |
| 1    | 41   | 0    | 0    | 0    | 0    | 20   |
| 1    | 23   | 0    | 0    | 0    | 0    | 19   |
| 0    | 0    | 0    | 0    | 0    | 0    | 0    |
| 1    | 0    | 0    | 0    | 0    | 0    | 0    |
| 0    | 0    | 0    | 0    | 0    | 0    | 0    |
| 0    | 0    | 0    | 0    | 0    | 0    | 0    |
| 0    | 0    | 0    | 0    | 0    | 3    | 8    |
| 34   | 58   | 19   | 56   | 45   | 46   | 32   |
| 0    | 0    | 0    | 0    | 0    | 0    | 0    |
| 0    | 7    | 0    | 0    | 0    | 0    | 1    |
| 0    | 0    | 0    | 0    | 0    | 0    | 5    |
| 0    | 5    | 0    | 0    | 0    | 0    | 0    |
| 0    | 12   | 0    | 0    | 0    | 17   | 10   |
| 0    | 32   | 0    | 0    | 0    | 8    | 73   |
| 0    | 1    | 0    | 0    | 0    | 0    | 0    |
| 0    | 0    | 0    | 0    | 0    | 0    | 0    |
| 0    | 4    | 0    | 0    | 0    | 0    | 0    |
| 0    | 49   | 0    | 0    | 0    | 0    | 7    |
| 0    | 0    | 0    | 0    | 0    | 0    | 0    |



|   |    |   |     |   |    |     |
|---|----|---|-----|---|----|-----|
| 0 | 5  | 0 | 0   | 0 | 1  | 1   |
| 0 | 2  | 0 | 0   | 0 | 0  | 0   |
| 0 | 0  | 0 | 0   | 0 | 0  | 0   |
| 0 | 0  | 0 | 0   | 0 | 0  | 0   |
| 0 | 0  | 0 | 0   | 0 | 0  | 0   |
| 0 | 0  | 0 | 0   | 0 | 0  | 0   |
| 0 | 0  | 0 | 0   | 0 | 0  | 0   |
| 1 | 0  | 0 | 3   | 0 | 0  | 0   |
| 0 | 3  | 0 | 0   | 0 | 0  | 0   |
| 1 | 3  | 0 | 5   | 1 | 2  | 0   |
| 0 | 0  | 0 | 0   | 0 | 0  | 0   |
| 0 | 0  | 0 | 0   | 0 | 0  | 0   |
| 0 | 0  | 0 | 0   | 0 | 0  | 0   |
| 0 | 1  | 0 | 0   | 0 | 0  | 1   |
| 0 | 0  | 0 | 0   | 0 | 0  | 0   |
| 0 | 0  | 0 | 0   | 0 | 0  | 0   |
| 0 | 0  | 0 | 0   | 0 | 0  | 0   |
| 0 | 0  | 0 | 0   | 0 | 1  | 0   |
| 0 | 1  | 0 | 0   | 0 | 0  | 0   |
| 0 | 0  | 0 | 0   | 0 | 0  | 0   |
| 0 | 0  | 0 | 4   | 0 | 0  | 0   |
| 1 | 1  | 0 | 0   | 0 | 0  | 1   |
| 0 | 0  | 0 | 0   | 0 | 0  | 0   |
| 0 | 1  | 0 | 0   | 0 | 0  | 0   |
| 0 | 0  | 0 | 0   | 0 | 0  | 0   |
| 0 | 0  | 0 | 0   | 0 | 0  | 0   |
| 0 | 0  | 0 | 0   | 0 | 0  | 0   |
| 0 | 0  | 0 | 0   | 0 | 0  | 0   |
| 0 | 0  | 0 | 0   | 0 | 0  | 0   |
| 0 | 61 | 0 | 0   | 0 | 0  | 2   |
| 0 | 19 | 1 | 0   | 0 | 0  | 48  |
| 0 | 40 | 0 | 0   | 0 | 0  | 0   |
| 0 | 0  | 0 | 0   | 0 | 0  | 0   |
| 0 | 0  | 0 | 0   | 0 | 0  | 0   |
| 0 | 0  | 0 | 0   | 0 | 0  | 0   |
| 1 | 68 | 0 | 0   | 0 | 14 | 80  |
| 0 | 34 | 0 | 3   | 0 | 0  | 656 |
| 0 | 7  | 0 | 0   | 0 | 0  | 1   |
| 1 | 6  | 0 | 0   | 0 | 0  | 12  |
| 0 | 0  | 0 | 0   | 0 | 0  | 1   |
| 0 | 0  | 0 | 0   | 0 | 0  | 0   |
| 0 | 0  | 0 | 0   | 0 | 0  | 0   |
| 0 | 70 | 0 | 0   | 0 | 3  | 27  |
| 0 | 1  | 0 | 0   | 0 | 0  | 0   |
| 0 | 0  | 0 | 0   | 0 | 0  | 0   |
| 0 | 1  | 0 | 0   | 0 | 0  | 1   |
| 0 | 0  | 0 | 0   | 0 | 0  | 0   |
| 0 | 0  | 3 | 129 | 9 | 2  | 0   |

|      |     |      |      |     |    |     |
|------|-----|------|------|-----|----|-----|
| 0    | 23  | 0    | 0    | 0   | 1  | 17  |
| 0    | 8   | 0    | 0    | 0   | 0  | 1   |
| 0    | 1   | 0    | 0    | 0   | 0  | 8   |
| 1    | 51  | 0    | 2    | 0   | 0  | 20  |
| 0    | 12  | 0    | 0    | 0   | 0  | 13  |
| 0    | 0   | 0    | 0    | 0   | 0  | 0   |
| 1333 | 143 | 1233 | 4431 | 431 | 37 | 34  |
| 0    | 39  | 0    | 0    | 0   | 0  | 50  |
| 1    | 275 | 0    | 3    | 0   | 4  | 204 |
| 0    | 107 | 0    | 0    | 0   | 4  | 15  |
| 2    | 63  | 0    | 0    | 0   | 0  | 7   |
| 0    | 0   | 0    | 0    | 0   | 0  | 5   |
| 2    | 74  | 0    | 0    | 0   | 0  | 62  |
| 0    | 0   | 0    | 0    | 0   | 0  | 0   |
| 0    | 1   | 0    | 0    | 0   | 0  | 0   |
| 0    | 0   | 0    | 0    | 0   | 0  | 0   |
| 0    | 0   | 0    | 0    | 0   | 0  | 0   |
| 0    | 0   | 0    | 0    | 0   | 0  | 0   |
| 4    | 421 | 2    | 1    | 0   | 0  | 240 |
| 0    | 0   | 0    | 0    | 0   | 0  | 0   |
| 0    | 1   | 0    | 0    | 0   | 0  | 0   |
| 0    | 19  | 0    | 0    | 0   | 0  | 6   |
| 0    | 1   | 0    | 0    | 0   | 0  | 2   |
| 0    | 0   | 0    | 0    | 0   | 0  | 0   |
| 2    | 0   | 0    | 0    | 0   | 0  | 0   |
| 0    | 0   | 0    | 0    | 0   | 0  | 0   |
| 7    | 3   | 11   | 27   | 0   | 2  | 1   |
| 0    | 0   | 0    | 0    | 0   | 0  | 0   |
| 0    | 0   | 0    | 0    | 0   | 0  | 0   |
| 1    | 0   | 0    | 0    | 0   | 0  | 0   |
| 4    | 0   | 0    | 0    | 0   | 0  | 0   |
| 0    | 0   | 0    | 0    | 0   | 0  | 0   |
| 0    | 0   | 0    | 0    | 0   | 0  | 1   |
| 5    | 0   | 0    | 3    | 0   | 0  | 3   |
| 0    | 0   | 0    | 0    | 0   | 0  | 0   |
| 0    | 0   | 0    | 0    | 0   | 4  | 0   |
| 28   | 0   | 0    | 2372 | 0   | 0  | 0   |
| 0    | 0   | 0    | 0    | 0   | 0  | 0   |
| 0    | 0   | 0    | 0    | 0   | 0  | 0   |
| 0    | 0   | 0    | 0    | 0   | 0  | 0   |
| 1    | 3   | 0    | 0    | 0   | 1  | 1   |
| 0    | 0   | 0    | 0    | 0   | 0  | 0   |
| 0    | 7   | 1    | 0    | 0   | 0  | 6   |
| 1    | 5   | 0    | 0    | 0   | 0  | 0   |
| 0    | 4   | 0    | 0    | 0   | 0  | 9   |
| 0    | 0   | 0    | 0    | 0   | 0  | 0   |
| 0    | 0   | 0    | 0    | 0   | 0  | 0   |
| 1    | 0   | 0    | 0    | 0   | 0  | 0   |











|      |     |    |    |    |    |    |
|------|-----|----|----|----|----|----|
| 0    | 0   | 0  | 0  | 0  | 0  | 0  |
| 49   | 43  | 69 | 41 | 11 | 47 | 26 |
| 39   | 23  | 59 | 64 | 13 | 43 | 13 |
| 21   | 27  | 20 | 42 | 20 | 14 | 6  |
| 0    | 0   | 0  | 0  | 0  | 6  | 3  |
| 0    | 0   | 0  | 0  | 0  | 0  | 0  |
| 7    | 6   | 0  | 0  | 8  | 0  | 0  |
| 0    | 0   | 1  | 0  | 3  | 2  | 0  |
| 0    | 0   | 0  | 0  | 0  | 0  | 0  |
| 10   | 14  | 33 | 14 | 36 | 2  | 6  |
| 1    | 5   | 0  | 0  | 0  | 3  | 1  |
| 0    | 0   | 0  | 0  | 0  | 0  | 6  |
| 0    | 0   | 0  | 0  | 0  | 0  | 0  |
| 0    | 2   | 0  | 2  | 0  | 0  | 0  |
| 0    | 7   | 0  | 0  | 0  | 1  | 0  |
| 0    | 1   | 0  | 0  | 0  | 0  | 1  |
| 1    | 4   | 0  | 0  | 0  | 0  | 8  |
| 0    | 6   | 0  | 0  | 0  | 0  | 3  |
| 0    | 0   | 0  | 0  | 0  | 0  | 0  |
| 0    | 0   | 0  | 0  | 0  | 0  | 1  |
| 3    | 0   | 1  | 0  | 0  | 0  | 2  |
| 0    | 0   | 0  | 0  | 0  | 0  | 1  |
| 0    | 0   | 0  | 0  | 0  | 0  | 0  |
| 0    | 0   | 0  | 0  | 0  | 0  | 0  |
| 0    | 0   | 0  | 0  | 0  | 0  | 0  |
| 0    | 0   | 0  | 0  | 0  | 0  | 0  |
| 0    | 0   | 0  | 0  | 0  | 0  | 0  |
| 0    | 0   | 0  | 7  | 0  | 0  | 0  |
| 0    | 0   | 0  | 0  | 0  | 0  | 0  |
| 0    | 0   | 0  | 0  | 0  | 0  | 0  |
| 0    | 0   | 0  | 0  | 0  | 0  | 0  |
| 0    | 0   | 0  | 0  | 0  | 0  | 0  |
| 0    | 0   | 0  | 0  | 0  | 1  | 0  |
| 0    | 0   | 0  | 0  | 0  | 0  | 0  |
| 3103 | 1   | 0  | 2  | 0  | 1  | 5  |
| 22   | 38  | 9  | 44 | 1  | 47 | 14 |
| 12   | 1   | 0  | 0  | 9  | 3  | 13 |
| 21   | 139 | 0  | 0  | 0  | 0  | 3  |
| 0    | 3   | 0  | 1  | 0  | 9  | 2  |
| 0    | 4   | 3  | 0  | 0  | 4  | 0  |
| 43   | 37  | 0  | 0  | 0  | 5  | 18 |
| 1    | 99  | 0  | 0  | 0  | 0  | 11 |
| 11   | 0   | 0  | 3  | 0  | 0  | 1  |
| 0    | 18  | 1  | 0  | 0  | 0  | 3  |
| 0    | 0   | 0  | 0  | 0  | 0  | 1  |
| 2    | 17  | 0  | 0  | 0  | 0  | 10 |
| 0    | 6   | 0  | 0  | 0  | 0  | 0  |
| 0    | 0   | 4  | 45 | 18 | 0  | 2  |
| 0    | 1   | 0  | 0  | 0  | 0  | 0  |
| 0    | 0   | 0  | 0  | 0  | 0  | 0  |



|      |     |     |     |     |     |     |
|------|-----|-----|-----|-----|-----|-----|
| 1691 | 106 | 31  | 159 | 21  | 80  | 911 |
| 29   | 73  | 0   | 0   | 1   | 8   | 14  |
| 0    | 2   | 0   | 0   | 0   | 0   | 0   |
| 89   | 1   | 3   | 39  | 0   | 0   | 0   |
| 13   | 0   | 0   | 1   | 0   | 0   | 0   |
| 0    | 0   | 0   | 0   | 0   | 0   | 0   |
| 0    | 0   | 0   | 0   | 0   | 0   | 0   |
| 0    | 0   | 0   | 0   | 0   | 0   | 0   |
| 0    | 0   | 0   | 0   | 0   | 0   | 0   |
| 1    | 0   | 0   | 1   | 0   | 0   | 0   |
| 0    | 0   | 0   | 0   | 0   | 0   | 0   |
| 0    | 0   | 0   | 0   | 0   | 0   | 0   |
| 4    | 1   | 0   | 0   | 0   | 2   | 6   |
| 0    | 0   | 0   | 0   | 0   | 0   | 70  |
| 42   | 4   | 0   | 0   | 0   | 4   | 1   |
| 0    | 0   | 0   | 0   | 0   | 0   | 0   |
| 0    | 0   | 0   | 0   | 0   | 0   | 2   |
| 0    | 0   | 0   | 0   | 0   | 0   | 0   |
| 0    | 0   | 0   | 0   | 0   | 0   | 0   |
| 135  | 2   | 0   | 0   | 0   | 6   | 1   |
| 294  | 0   | 0   | 2   | 0   | 0   | 1   |
| 0    | 0   | 0   | 0   | 0   | 0   | 0   |
| 2    | 0   | 0   | 0   | 0   | 0   | 0   |
| 24   | 0   | 0   | 0   | 0   | 0   | 0   |
| 1310 | 36  | 3   | 20  | 0   | 99  | 25  |
| 0    | 0   | 0   | 0   | 0   | 0   | 0   |
| 0    | 0   | 0   | 0   | 0   | 0   | 0   |
| 4014 | 13  | 0   | 53  | 23  | 254 | 1   |
| 0    | 4   | 0   | 0   | 0   | 3   | 4   |
| 262  | 26  | 169 | 444 | 281 | 56  | 20  |
| 54   | 2   | 70  | 237 | 95  | 4   | 6   |
| 0    | 5   | 0   | 0   | 0   | 4   | 10  |
| 19   | 15  | 28  | 3   | 6   | 5   | 3   |
| 213  | 1   | 0   | 4   | 0   | 19  | 4   |
| 142  | 16  | 12  | 141 | 51  | 12  | 1   |
| 31   | 2   | 22  | 21  | 17  | 3   | 1   |
| 197  | 0   | 2   | 0   | 2   | 1   | 0   |
| 0    | 0   | 0   | 0   | 0   | 0   | 0   |
| 0    | 0   | 0   | 0   | 0   | 0   | 0   |
| 0    | 0   | 0   | 0   | 0   | 0   | 0   |
| 0    | 0   | 0   | 0   | 0   | 0   | 0   |
| 0    | 0   | 0   | 0   | 0   | 0   | 0   |
| 0    | 0   | 0   | 0   | 0   | 0   | 0   |
| 2489 | 1   | 0   | 8   | 2   | 43  | 5   |
| 4815 | 18  | 9   | 150 | 22  | 100 | 19  |
| 0    | 0   | 0   | 0   | 0   | 0   | 1   |
| 34   | 6   | 33  | 15  | 2   | 13  | 7   |
| 0    | 0   | 24  | 64  | 0   | 3   | 0   |

|      |     |    |     |    |      |     |
|------|-----|----|-----|----|------|-----|
| 9    | 0   | 0  | 0   | 0  | 0    | 0   |
| 6    | 0   | 0  | 0   | 0  | 1    | 0   |
| 21   | 0   | 0  | 0   | 1  | 0    | 0   |
| 24   | 0   | 0  | 0   | 0  | 3    | 0   |
| 2    | 0   | 0  | 0   | 0  | 0    | 0   |
| 0    | 0   | 0  | 0   | 0  | 0    | 0   |
| 0    | 0   | 0  | 0   | 0  | 0    | 0   |
| 0    | 0   | 0  | 0   | 0  | 0    | 0   |
| 15   | 0   | 1  | 1   | 7  | 0    | 0   |
| 0    | 4   | 2  | 2   | 0  | 3    | 264 |
| 3    | 11  | 0  | 0   | 0  | 0    | 3   |
| 9    | 0   | 0  | 0   | 0  | 1    | 0   |
| 0    | 0   | 0  | 0   | 0  | 0    | 1   |
| 0    | 0   | 0  | 0   | 0  | 0    | 0   |
| 0    | 0   | 0  | 0   | 0  | 0    | 0   |
| 6343 | 35  | 7  | 345 | 10 | 1037 | 138 |
| 416  | 0   | 0  | 10  | 0  | 114  | 35  |
| 42   | 0   | 0  | 1   | 0  | 34   | 3   |
| 0    | 5   | 0  | 5   | 1  | 2    | 0   |
| 1    | 0   | 0  | 0   | 0  | 2    | 0   |
| 6    | 0   | 0  | 0   | 0  | 0    | 0   |
| 2    | 0   | 0  | 0   | 0  | 3    | 0   |
| 1    | 0   | 0  | 0   | 0  | 0    | 0   |
| 0    | 0   | 0  | 0   | 0  | 3    | 0   |
| 61   | 0   | 0  | 0   | 0  | 2    | 2   |
| 5    | 0   | 0  | 0   | 0  | 10   | 0   |
| 10   | 0   | 0  | 0   | 0  | 0    | 0   |
| 0    | 0   | 0  | 0   | 0  | 0    | 0   |
| 825  | 2   | 1  | 6   | 0  | 70   | 0   |
| 84   | 5   | 3  | 5   | 5  | 14   | 4   |
| 383  | 8   | 2  | 120 | 5  | 24   | 11  |
| 24   | 17  | 0  | 0   | 0  | 10   | 11  |
| 33   | 24  | 11 | 129 | 19 | 44   | 18  |
| 28   | 0   | 4  | 1   | 0  | 0    | 0   |
| 0    | 0   | 10 | 7   | 0  | 0    | 0   |
| 0    | 0   | 0  | 1   | 0  | 0    | 0   |
| 0    | 0   | 0  | 0   | 0  | 0    | 0   |
| 0    | 0   | 0  | 0   | 0  | 0    | 0   |
| 48   | 582 | 9  | 6   | 29 | 57   | 276 |
| 37   | 517 | 2  | 0   | 8  | 9    | 137 |
| 6    | 96  | 0  | 0   | 0  | 23   | 71  |
| 2    | 63  | 0  | 0   | 0  | 0    | 115 |
| 157  | 4   | 0  | 0   | 1  | 1    | 49  |
| 0    | 19  | 0  | 0   | 0  | 0    | 10  |
| 0    | 2   | 0  | 1   | 0  | 0    | 0   |
| 0    | 0   | 0  | 0   | 0  | 1    | 1   |
| 0    | 0   | 0  | 0   | 0  | 0    | 0   |
| 0    | 1   | 0  | 0   | 0  | 0    | 1   |

|     |    |    |    |   |    |     |
|-----|----|----|----|---|----|-----|
| 0   | 0  | 0  | 0  | 0 | 0  | 0   |
| 0   | 0  | 0  | 0  | 0 | 0  | 0   |
| 0   | 0  | 0  | 0  | 0 | 0  | 0   |
| 0   | 0  | 0  | 0  | 0 | 0  | 0   |
| 0   | 1  | 0  | 0  | 0 | 0  | 0   |
| 0   | 0  | 0  | 0  | 0 | 0  | 0   |
| 0   | 0  | 0  | 0  | 0 | 0  | 0   |
| 0   | 0  | 0  | 0  | 0 | 0  | 0   |
| 0   | 0  | 0  | 0  | 0 | 0  | 0   |
| 0   | 0  | 0  | 0  | 0 | 0  | 0   |
| 0   | 0  | 0  | 0  | 0 | 0  | 1   |
| 0   | 0  | 0  | 0  | 0 | 0  | 0   |
| 0   | 0  | 0  | 0  | 0 | 0  | 0   |
| 0   | 0  | 0  | 0  | 0 | 0  | 0   |
| 0   | 0  | 0  | 0  | 0 | 0  | 0   |
| 0   | 0  | 0  | 0  | 0 | 0  | 0   |
| 0   | 29 | 0  | 0  | 0 | 0  | 6   |
| 0   | 0  | 1  | 0  | 0 | 0  | 0   |
| 1   | 12 | 0  | 0  | 0 | 1  | 1   |
| 180 | 0  | 5  | 9  | 0 | 10 | 1   |
| 118 | 11 | 0  | 0  | 5 | 10 | 4   |
| 0   | 4  | 0  | 24 | 0 | 0  | 0   |
| 17  | 0  | 4  | 9  | 3 | 1  | 0   |
| 0   | 0  | 0  | 0  | 0 | 0  | 0   |
| 0   | 0  | 0  | 0  | 0 | 0  | 12  |
| 0   | 0  | 0  | 0  | 0 | 0  | 0   |
| 0   | 0  | 0  | 0  | 0 | 0  | 0   |
| 335 | 16 | 1  | 2  | 0 | 1  | 0   |
| 1   | 3  | 0  | 0  | 0 | 0  | 5   |
| 0   | 0  | 1  | 0  | 0 | 0  | 0   |
| 0   | 0  | 0  | 0  | 0 | 0  | 0   |
| 0   | 6  | 0  | 0  | 0 | 0  | 0   |
| 0   | 21 | 0  | 0  | 0 | 0  | 170 |
| 2   | 2  | 10 | 10 | 0 | 0  | 1   |
| 0   | 0  | 0  | 0  | 0 | 0  | 0   |
| 0   | 0  | 0  | 0  | 0 | 0  | 0   |
| 0   | 0  | 0  | 0  | 0 | 0  | 0   |
| 0   | 0  | 0  | 0  | 0 | 0  | 0   |
| 0   | 0  | 0  | 0  | 0 | 0  | 0   |
| 0   | 0  | 0  | 0  | 0 | 0  | 0   |
| 0   | 0  | 0  | 2  | 0 | 0  | 0   |
| 0   | 0  | 0  | 0  | 0 | 0  | 0   |
| 0   | 0  | 0  | 0  | 0 | 0  | 0   |
| 0   | 0  | 0  | 0  | 0 | 0  | 0   |
| 0   | 0  | 0  | 0  | 0 | 0  | 0   |
| 0   | 2  | 0  | 0  | 1 | 0  | 0   |
| 7   | 7  | 17 | 15 | 1 | 0  | 0   |
| 0   | 0  | 0  | 0  | 0 | 0  | 0   |
| 0   | 0  | 0  | 0  | 0 | 0  | 0   |
| 0   | 0  | 0  | 0  | 0 | 0  | 0   |

|     |      |     |      |      |     |     |
|-----|------|-----|------|------|-----|-----|
| 0   | 0    | 0   | 0    | 0    | 0   | 0   |
| 0   | 0    | 0   | 0    | 0    | 0   | 0   |
| 720 | 1957 | 784 | 824  | 1116 | 460 | 644 |
| 483 | 0    | 126 | 146  | 50   | 64  | 16  |
| 104 | 453  | 260 | 1186 | 754  | 135 | 162 |
| 2   | 82   | 0   | 0    | 0    | 0   | 51  |
| 92  | 385  | 86  | 119  | 55   | 101 | 52  |
| 7   | 311  | 3   | 0    | 1    | 2   | 78  |
| 0   | 71   | 0   | 0    | 0    | 0   | 3   |
| 46  | 19   | 33  | 10   | 26   | 34  | 5   |
| 2   | 69   | 0   | 0    | 0    | 0   | 3   |
| 0   | 19   | 0   | 0    | 0    | 0   | 6   |
| 2   | 44   | 0   | 0    | 4    | 14  | 23  |
| 0   | 152  | 0   | 0    | 0    | 16  | 58  |
| 51  | 167  | 92  | 56   | 66   | 10  | 40  |
| 15  | 35   | 32  | 0    | 0    | 111 | 32  |
| 0   | 25   | 1   | 0    | 0    | 0   | 1   |
| 8   | 67   | 2   | 0    | 0    | 0   | 10  |
| 26  | 200  | 52  | 5    | 28   | 18  | 9   |
| 0   | 28   | 0   | 0    | 0    | 8   | 5   |
| 0   | 5    | 0   | 0    | 0    | 0   | 2   |
| 0   | 4    | 0   | 0    | 0    | 0   | 0   |
| 24  | 32   | 9   | 2    | 1    | 6   | 100 |
| 1   | 41   | 0   | 0    | 0    | 0   | 28  |
| 0   | 11   | 2   | 0    | 0    | 0   | 1   |
| 14  | 39   | 94  | 10   | 12   | 1   | 15  |
| 22  | 58   | 0   | 2    | 3    | 13  | 26  |
| 0   | 0    | 0   | 0    | 0    | 0   | 0   |
| 0   | 6    | 0   | 0    | 0    | 0   | 20  |
| 0   | 5    | 0   | 0    | 0    | 0   | 9   |
| 0   | 11   | 0   | 0    | 0    | 1   | 12  |
| 0   | 0    | 0   | 0    | 0    | 0   | 0   |
| 0   | 3    | 0   | 0    | 0    | 0   | 0   |
| 4   | 0    | 0   | 0    | 0    | 0   | 0   |
| 1   | 46   | 0   | 0    | 0    | 0   | 6   |
| 0   | 1    | 0   | 0    | 0    | 0   | 0   |
| 1   | 7    | 0   | 0    | 0    | 0   | 6   |
| 0   | 0    | 0   | 0    | 0    | 0   | 1   |
| 0   | 4    | 0   | 0    | 0    | 0   | 1   |
| 0   | 0    | 0   | 0    | 0    | 0   | 2   |
| 0   | 0    | 0   | 0    | 0    | 0   | 0   |
| 0   | 0    | 0   | 0    | 0    | 0   | 0   |
| 0   | 10   | 14  | 6    | 6    | 0   | 2   |
| 0   | 0    | 0   | 0    | 0    | 0   | 0   |
| 0   | 0    | 0   | 0    | 0    | 0   | 0   |
| 0   | 0    | 0   | 0    | 0    | 0   | 0   |
| 0   | 6    | 0   | 0    | 0    | 0   | 0   |
| 0   | 0    | 0   | 0    | 0    | 0   | 0   |





|     |      |     |     |     |      |     |
|-----|------|-----|-----|-----|------|-----|
| 0   | 0    | 0   | 0   | 0   | 1    | 0   |
| 0   | 0    | 0   | 0   | 0   | 0    | 0   |
| 3   | 0    | 0   | 0   | 0   | 0    | 0   |
| 0   | 32   | 0   | 0   | 1   | 5    | 18  |
| 0   | 0    | 0   | 3   | 1   | 0    | 0   |
| 0   | 2    | 0   | 0   | 0   | 0    | 0   |
| 11  | 0    | 0   | 0   | 0   | 0    | 0   |
| 0   | 0    | 0   | 0   | 0   | 0    | 0   |
| 6   | 186  | 11  | 10  | 152 | 18   | 76  |
| 714 | 1767 | 279 | 702 | 238 | 1209 | 925 |
| 0   | 25   | 0   | 0   | 0   | 4    | 2   |
| 68  | 1    | 37  | 37  | 30  | 26   | 1   |
| 143 | 183  | 68  | 143 | 119 | 156  | 92  |
| 0   | 4    | 2   | 2   | 1   | 8    | 5   |
| 0   | 2    | 0   | 0   | 0   | 0    | 0   |
| 3   | 9    | 0   | 2   | 0   | 4    | 4   |
| 24  | 67   | 72  | 15  | 14  | 24   | 14  |
| 2   | 4    | 1   | 7   | 7   | 10   | 2   |
| 8   | 0    | 3   | 14  | 4   | 8    | 0   |
| 0   | 12   | 0   | 0   | 0   | 14   | 3   |
| 3   | 12   | 0   | 27  | 6   | 3    | 3   |
| 0   | 8    | 0   | 0   | 0   | 0    | 7   |
| 0   | 9    | 0   | 0   | 6   | 3    | 3   |
| 0   | 0    | 0   | 0   | 0   | 0    | 0   |
| 0   | 6    | 0   | 0   | 0   | 0    | 0   |
| 1   | 0    | 1   | 0   | 0   | 1    | 0   |
| 0   | 0    | 0   | 0   | 0   | 0    | 2   |
| 2   | 11   | 0   | 4   | 2   | 6    | 7   |
| 0   | 1    | 0   | 0   | 0   | 1    | 0   |
| 0   | 0    | 0   | 0   | 0   | 0    | 0   |
| 0   | 0    | 0   | 0   | 0   | 0    | 1   |
| 1   | 0    | 0   | 0   | 0   | 0    | 0   |
| 2   | 1    | 0   | 0   | 0   | 2    | 0   |
| 1   | 3    | 0   | 0   | 0   | 0    | 2   |
| 0   | 0    | 0   | 0   | 0   | 0    | 0   |
| 0   | 0    | 0   | 0   | 0   | 0    | 0   |
| 1   | 1    | 0   | 0   | 0   | 0    | 0   |
| 1   | 6    | 0   | 1   | 0   | 4    | 1   |
| 0   | 0    | 0   | 0   | 0   | 0    | 0   |
| 0   | 0    | 0   | 0   | 0   | 0    | 0   |
| 0   | 0    | 0   | 0   | 0   | 0    | 0   |
| 0   | 0    | 0   | 0   | 0   | 0    | 0   |
| 0   | 14   | 0   | 0   | 0   | 0    | 0   |
| 0   | 0    | 0   | 0   | 0   | 0    | 0   |
| 0   | 1    | 0   | 0   | 0   | 0    | 0   |
| 0   | 0    | 15  | 0   | 0   | 0    | 0   |
| 0   | 0    | 0   | 0   | 0   | 0    | 0   |
| 0   | 0    | 0   | 0   | 0   | 0    | 0   |



|     |     |     |     |     |     |     |
|-----|-----|-----|-----|-----|-----|-----|
| 0   | 0   | 0   | 0   | 0   | 1   | 0   |
| 350 | 313 | 122 | 263 | 134 | 340 | 116 |
| 27  | 148 | 14  | 42  | 9   | 30  | 84  |
| 36  | 20  | 27  | 103 | 11  | 79  | 26  |
| 57  | 38  | 41  | 30  | 64  | 57  | 8   |
| 171 | 30  | 16  | 45  | 20  | 29  | 10  |
| 15  | 20  | 3   | 22  | 11  | 15  | 5   |
| 0   | 4   | 0   | 1   | 0   | 7   | 1   |
| 6   | 2   | 0   | 0   | 1   | 13  | 3   |
| 15  | 76  | 0   | 8   | 4   | 22  | 60  |
| 0   | 15  | 0   | 0   | 0   | 4   | 10  |
| 0   | 18  | 0   | 0   | 0   | 4   | 2   |
| 2   | 1   | 0   | 0   | 0   | 0   | 0   |
| 0   | 0   | 0   | 0   | 0   | 0   | 2   |
| 6   | 2   | 2   | 3   | 3   | 0   | 1   |
| 0   | 0   | 0   | 0   | 0   | 0   | 0   |
| 8   | 8   | 0   | 3   | 0   | 12  | 2   |
| 0   | 0   | 0   | 0   | 0   | 5   | 12  |
| 0   | 0   | 0   | 1   | 0   | 0   | 0   |
| 0   | 2   | 0   | 0   | 1   | 1   | 1   |
| 0   | 4   | 0   | 1   | 0   | 0   | 0   |
| 2   | 0   | 0   | 1   | 1   | 1   | 1   |
| 0   | 1   | 0   | 1   | 0   | 0   | 0   |
| 0   | 0   | 0   | 0   | 0   | 0   | 0   |
| 0   | 0   | 0   | 0   | 0   | 0   | 0   |
| 1   | 0   | 0   | 3   | 0   | 0   | 2   |
| 0   | 0   | 0   | 0   | 0   | 0   | 0   |
| 0   | 0   | 0   | 0   | 0   | 0   | 1   |
| 0   | 1   | 0   | 0   | 0   | 0   | 0   |
| 0   | 0   | 0   | 0   | 0   | 0   | 0   |
| 0   | 0   | 0   | 0   | 0   | 0   | 0   |
| 3   | 0   | 0   | 0   | 0   | 0   | 0   |
| 0   | 0   | 0   | 0   | 0   | 0   | 0   |
| 0   | 0   | 0   | 0   | 0   | 0   | 0   |
| 0   | 0   | 0   | 0   | 0   | 1   | 1   |
| 0   | 0   | 0   | 0   | 0   | 0   | 0   |
| 551 | 79  | 353 | 209 | 286 | 125 | 25  |
| 0   | 20  | 2   | 0   | 0   | 17  | 17  |
| 72  | 0   | 0   | 32  | 11  | 55  | 3   |
| 6   | 0   | 0   | 86  | 42  | 17  | 0   |
| 27  | 1   | 2   | 5   | 2   | 13  | 1   |
| 0   | 6   | 0   | 0   | 0   | 0   | 0   |
| 19  | 0   | 2   | 15  | 10  | 1   | 0   |
| 0   | 6   | 0   | 0   | 0   | 4   | 1   |
| 0   | 0   | 0   | 0   | 0   | 0   | 0   |
| 0   | 0   | 0   | 0   | 1   | 0   | 0   |
| 1   | 0   | 0   | 0   | 0   | 0   | 0   |
| 0   | 0   | 0   | 0   | 0   | 0   | 0   |



|     |    |     |     |     |    |    |
|-----|----|-----|-----|-----|----|----|
| 0   | 0  | 0   | 0   | 0   | 0  | 0  |
| 110 | 62 | 206 | 318 | 61  | 65 | 27 |
| 4   | 8  | 4   | 0   | 2   | 9  | 9  |
| 0   | 0  | 0   | 0   | 0   | 0  | 0  |
| 0   | 0  | 0   | 0   | 0   | 0  | 1  |
| 0   | 0  | 0   | 0   | 0   | 0  | 0  |
| 0   | 0  | 0   | 0   | 0   | 0  | 0  |
| 0   | 0  | 0   | 0   | 0   | 0  | 0  |
| 0   | 0  | 0   | 0   | 0   | 0  | 0  |
| 36  | 97 | 107 | 170 | 109 | 45 | 19 |
| 50  | 20 | 49  | 41  | 36  | 42 | 20 |
| 0   | 2  | 0   | 0   | 0   | 0  | 0  |
| 0   | 2  | 0   | 0   | 0   | 0  | 0  |
| 0   | 0  | 0   | 0   | 0   | 0  | 0  |
| 0   | 0  | 0   | 0   | 0   | 0  | 0  |
| 0   | 5  | 0   | 0   | 0   | 0  | 0  |
| 0   | 3  | 0   | 0   | 0   | 0  | 0  |
| 0   | 0  | 0   | 0   | 0   | 0  | 0  |
| 0   | 1  | 0   | 0   | 0   | 0  | 0  |
| 0   | 6  | 0   | 0   | 0   | 0  | 0  |
| 0   | 0  | 0   | 0   | 0   | 0  | 0  |
| 0   | 0  | 0   | 0   | 0   | 0  | 0  |
| 0   | 0  | 0   | 0   | 0   | 0  | 0  |
| 0   | 0  | 0   | 0   | 0   | 0  | 0  |
| 0   | 0  | 0   | 1   | 0   | 0  | 0  |
| 0   | 0  | 0   | 0   | 0   | 0  | 0  |
| 0   | 0  | 0   | 0   | 0   | 0  | 0  |
| 0   | 0  | 0   | 0   | 0   | 0  | 0  |
| 0   | 0  | 0   | 0   | 0   | 0  | 0  |
| 0   | 2  | 0   | 0   | 0   | 0  | 2  |
| 0   | 0  | 0   | 0   | 0   | 0  | 0  |
| 0   | 0  | 0   | 0   | 0   | 0  | 0  |
| 10  | 2  | 0   | 0   | 0   | 0  | 10 |
| 0   | 0  | 0   | 1   | 0   | 0  | 2  |
| 2   | 0  | 0   | 0   | 0   | 0  | 0  |
| 0   | 0  | 0   | 1   | 1   | 0  | 0  |
| 0   | 3  | 0   | 0   | 0   | 0  | 0  |
| 0   | 0  | 0   | 0   | 0   | 0  | 0  |
| 0   | 7  | 2   | 0   | 0   | 3  | 21 |
| 0   | 3  | 0   | 0   | 0   | 0  | 3  |
| 0   | 0  | 0   | 0   | 0   | 0  | 0  |
| 0   | 0  | 0   | 0   | 0   | 0  | 0  |
| 1   | 0  | 0   | 0   | 0   | 1  | 0  |
| 0   | 0  | 0   | 0   | 0   | 0  | 0  |
| 4   | 0  | 0   | 0   | 0   | 0  | 0  |
| 0   | 0  | 0   | 0   | 0   | 0  | 0  |

|    |     |   |   |   |   |     |
|----|-----|---|---|---|---|-----|
| 0  | 9   | 0 | 0 | 0 | 0 | 20  |
| 0  | 0   | 0 | 0 | 0 | 0 | 0   |
| 0  | 0   | 0 | 0 | 0 | 0 | 0   |
| 2  | 0   | 0 | 0 | 0 | 0 | 18  |
| 0  | 3   | 0 | 1 | 0 | 0 | 0   |
| 0  | 0   | 0 | 0 | 0 | 0 | 0   |
| 1  | 66  | 0 | 0 | 0 | 4 | 35  |
| 0  | 0   | 0 | 0 | 0 | 0 | 0   |
| 0  | 18  | 0 | 0 | 0 | 0 | 4   |
| 0  | 0   | 0 | 0 | 0 | 0 | 0   |
| 0  | 0   | 0 | 0 | 0 | 0 | 0   |
| 0  | 0   | 0 | 0 | 0 | 0 | 0   |
| 0  | 2   | 0 | 0 | 0 | 0 | 1   |
| 0  | 0   | 0 | 0 | 0 | 0 | 0   |
| 9  | 190 | 3 | 1 | 0 | 1 | 806 |
| 0  | 0   | 0 | 0 | 0 | 0 | 0   |
| 0  | 0   | 0 | 0 | 0 | 0 | 0   |
| 25 | 0   | 0 | 0 | 0 | 0 | 0   |
| 0  | 0   | 0 | 0 | 0 | 0 | 0   |
| 0  | 0   | 0 | 0 | 0 | 0 | 0   |
| 0  | 0   | 0 | 0 | 0 | 0 | 0   |
| 0  | 1   | 0 | 0 | 0 | 5 | 0   |
| 0  | 1   | 0 | 0 | 0 | 0 | 3   |
| 0  | 0   | 0 | 0 | 0 | 0 | 0   |
| 0  | 0   | 0 | 0 | 0 | 0 | 1   |
| 0  | 0   | 0 | 0 | 0 | 0 | 0   |
| 0  | 0   | 0 | 0 | 0 | 0 | 0   |

| 64.SUR | 64.DCM | 65.SUR | 65.DCM | 66.SUR | 66.DCM | 67.SUR |    |
|--------|--------|--------|--------|--------|--------|--------|----|
| 0      |        | 0      | 0      | 0      | 0      | 0      | 0  |
| 0      |        | 0      | 0      | 0      | 0      | 0      | 0  |
| 0      |        | 0      | 0      | 0      | 0      | 0      | 0  |
| 0      |        | 0      | 0      | 0      | 0      | 0      | 0  |
| 0      |        | 0      | 0      | 0      | 0      | 0      | 0  |
| 0      |        | 0      | 0      | 0      | 0      | 0      | 0  |
| 0      |        | 0      | 0      | 0      | 0      | 0      | 0  |
| 0      |        | 0      | 0      | 0      | 0      | 0      | 0  |
| 0      |        | 14     | 4      | 137    | 0      | 0      | 0  |
| 12     |        | 20     | 6      | 20     | 0      | 0      | 0  |
| 0      |        | 0      | 0      | 0      | 0      | 0      | 0  |
| 0      |        | 0      | 0      | 0      | 0      | 0      | 0  |
| 0      |        | 0      | 0      | 0      | 0      | 0      | 0  |
| 0      |        | 0      | 0      | 0      | 0      | 0      | 0  |
| 0      |        | 0      | 0      | 53     | 0      | 0      | 0  |
| 0      |        | 0      | 0      | 0      | 0      | 0      | 0  |
| 0      |        | 1      | 0      | 0      | 0      | 0      | 0  |
| 0      |        | 11     | 5      | 17     | 1      | 1      | 0  |
| 407    |        | 200    | 583    | 1957   | 239    | 189    | 4  |
| 0      |        | 0      | 0      | 0      | 0      | 1      | 0  |
| 0      |        | 0      | 0      | 0      | 0      | 0      | 0  |
| 0      |        | 4      | 1      | 0      | 0      | 0      | 0  |
| 0      |        | 0      | 0      | 0      | 0      | 0      | 0  |
| 0      |        | 0      | 0      | 0      | 0      | 0      | 0  |
| 0      |        | 0      | 0      | 0      | 0      | 0      | 0  |
| 0      |        | 0      | 0      | 0      | 0      | 0      | 0  |
| 0      |        | 0      | 0      | 0      | 0      | 0      | 0  |
| 0      |        | 0      | 0      | 0      | 0      | 0      | 0  |
| 0      |        | 0      | 0      | 0      | 0      | 0      | 0  |
| 0      |        | 0      | 1      | 1      | 0      | 0      | 0  |
| 0      |        | 0      | 1      | 0      | 0      | 0      | 0  |
| 0      |        | 0      | 0      | 0      | 0      | 0      | 0  |
| 0      |        | 0      | 0      | 21     | 0      | 0      | 0  |
| 6      |        | 0      | 36     | 15     | 0      | 0      | 0  |
| 0      |        | 0      | 0      | 0      | 0      | 0      | 0  |
| 0      |        | 0      | 0      | 0      | 0      | 0      | 0  |
| 84     |        | 39     | 396    | 59     | 24     | 62     | 0  |
| 74     |        | 126    | 208    | 709    | 11     | 26     | 0  |
| 65     |        | 12     | 2      | 25     | 0      | 0      | 4  |
| 0      |        | 0      | 0      | 1      | 0      | 0      | 0  |
| 10     |        | 31     | 16     | 52     | 33     | 58     | 0  |
| 0      |        | 0      | 0      | 0      | 39     | 35     | 0  |
| 3      |        | 11     | 41     | 146    | 0      | 0      | 0  |
| 668    |        | 7      | 88     | 142    | 2      | 0      | 0  |
| 1      |        | 2      | 15     | 48     | 21     | 72     | 0  |
| 0      |        | 0      | 1      | 0      | 0      | 0      | 0  |
| 3      |        | 2      | 1      | 22     | 25     | 8      | 24 |





|     |    |    |    |       |      |     |
|-----|----|----|----|-------|------|-----|
| 0   | 0  | 0  | 0  | 0     | 0    | 0   |
| 0   | 0  | 0  | 0  | 0     | 0    | 0   |
| 0   | 0  | 0  | 0  | 0     | 0    | 0   |
| 0   | 0  | 2  | 15 | 0     | 0    | 0   |
| 0   | 0  | 0  | 0  | 0     | 0    | 0   |
| 1   | 0  | 6  | 79 | 21779 | 3970 | 504 |
| 0   | 0  | 0  | 0  | 105   | 12   | 9   |
| 0   | 0  | 0  | 0  | 0     | 0    | 0   |
| 0   | 0  | 0  | 0  | 0     | 0    | 0   |
| 0   | 0  | 0  | 0  | 2     | 0    | 0   |
| 0   | 0  | 0  | 0  | 0     | 0    | 0   |
| 0   | 0  | 0  | 0  | 0     | 0    | 0   |
| 0   | 0  | 0  | 0  | 4     | 0    | 0   |
| 0   | 0  | 0  | 0  | 0     | 0    | 0   |
| 0   | 0  | 0  | 0  | 0     | 0    | 0   |
| 0   | 0  | 0  | 0  | 0     | 0    | 0   |
| 0   | 0  | 0  | 7  | 1     | 0    | 0   |
| 0   | 0  | 0  | 0  | 0     | 0    | 0   |
| 0   | 0  | 0  | 0  | 0     | 0    | 0   |
| 241 | 24 | 13 | 49 | 0     | 0    | 0   |
| 0   | 0  | 0  | 0  | 0     | 0    | 0   |
| 0   | 0  | 0  | 0  | 0     | 0    | 0   |
| 0   | 1  | 1  | 8  | 3     | 0    | 0   |
| 0   | 3  | 1  | 2  | 0     | 9    | 0   |
| 0   | 0  | 0  | 0  | 0     | 0    | 0   |
| 0   | 0  | 0  | 0  | 12    | 0    | 0   |
| 1   | 0  | 9  | 10 | 0     | 0    | 0   |
| 0   | 0  | 0  | 0  | 24    | 0    | 0   |
| 8   | 0  | 0  | 22 | 0     | 0    | 0   |
| 0   | 0  | 0  | 0  | 3     | 4    | 0   |
| 0   | 0  | 0  | 0  | 0     | 0    | 0   |
| 0   | 0  | 0  | 0  | 0     | 0    | 0   |
| 0   | 3  | 0  | 0  | 0     | 0    | 0   |
| 0   | 0  | 0  | 0  | 0     | 0    | 0   |
| 1   | 0  | 0  | 0  | 1     | 0    | 0   |
| 2   | 3  | 2  | 1  | 1     | 0    | 0   |
| 0   | 0  | 0  | 0  | 0     | 0    | 0   |
| 0   | 0  | 0  | 0  | 0     | 0    | 0   |
| 0   | 0  | 0  | 0  | 0     | 0    | 0   |
| 0   | 0  | 1  | 0  | 0     | 3    | 0   |
| 11  | 0  | 0  | 0  | 74    | 5    | 0   |
| 0   | 0  | 0  | 0  | 0     | 0    | 0   |
| 0   | 0  | 0  | 0  | 0     | 0    | 0   |
| 0   | 0  | 0  | 0  | 0     | 0    | 0   |
| 181 | 6  | 0  | 0  | 9     | 0    | 0   |
| 0   | 0  | 0  | 0  | 0     | 0    | 0   |
| 0   | 0  | 0  | 0  | 0     | 0    | 0   |
| 0   | 0  | 0  | 0  | 1     | 0    | 0   |



|     |     |     |     |     |     |      |
|-----|-----|-----|-----|-----|-----|------|
| 0   | 0   | 1   | 0   | 0   | 0   | 0    |
| 0   | 0   | 1   | 0   | 13  | 0   | 4    |
| 1   | 0   | 0   | 0   | 16  | 0   | 3    |
| 0   | 0   | 0   | 1   | 0   | 0   | 0    |
| 0   | 0   | 0   | 0   | 105 | 0   | 0    |
| 5   | 2   | 0   | 0   | 0   | 0   | 0    |
| 0   | 0   | 0   | 0   | 0   | 0   | 0    |
| 0   | 0   | 0   | 0   | 23  | 0   | 16   |
| 0   | 0   | 0   | 0   | 0   | 0   | 0    |
| 0   | 0   | 0   | 0   | 0   | 0   | 0    |
| 0   | 0   | 0   | 0   | 0   | 0   | 0    |
| 0   | 0   | 0   | 0   | 0   | 0   | 8    |
| 0   | 0   | 0   | 0   | 0   | 0   | 0    |
| 0   | 0   | 1   | 3   | 0   | 0   | 0    |
| 0   | 0   | 0   | 0   | 0   | 0   | 0    |
| 0   | 0   | 0   | 0   | 0   | 0   | 0    |
| 0   | 0   | 0   | 0   | 0   | 0   | 0    |
| 0   | 0   | 0   | 0   | 0   | 0   | 0    |
| 0   | 3   | 1   | 0   | 0   | 0   | 0    |
| 0   | 0   | 0   | 1   | 0   | 0   | 0    |
| 174 | 0   | 4   | 0   | 0   | 0   | 4    |
| 10  | 0   | 9   | 6   | 0   | 26  | 0    |
| 0   | 0   | 0   | 0   | 0   | 0   | 0    |
| 0   | 0   | 0   | 0   | 0   | 0   | 0    |
| 162 | 134 | 768 | 157 | 4   | 125 | 0    |
| 11  | 27  | 27  | 0   | 95  | 5   | 0    |
| 0   | 0   | 0   | 0   | 0   | 0   | 0    |
| 0   | 0   | 0   | 0   | 0   | 0   | 0    |
| 0   | 1   | 0   | 0   | 0   | 0   | 0    |
| 1   | 0   | 0   | 0   | 0   | 0   | 0    |
| 0   | 0   | 0   | 0   | 0   | 0   | 0    |
| 0   | 0   | 0   | 0   | 0   | 0   | 0    |
| 0   | 0   | 1   | 0   | 0   | 0   | 0    |
| 0   | 0   | 0   | 0   | 0   | 0   | 0    |
| 0   | 0   | 0   | 0   | 0   | 0   | 0    |
| 0   | 0   | 0   | 0   | 0   | 0   | 0    |
| 94  | 0   | 0   | 0   | 0   | 0   | 6458 |
| 54  | 42  | 63  | 150 | 0   | 0   | 1    |
| 7   | 3   | 37  | 54  | 0   | 0   | 5    |
| 0   | 0   | 0   | 0   | 0   | 0   | 37   |
| 0   | 3   | 9   | 14  | 5   | 0   | 0    |
| 0   | 0   | 0   | 0   | 0   | 0   | 0    |
| 0   | 0   | 6   | 0   | 50  | 0   | 0    |
| 0   | 0   | 0   | 0   | 0   | 0   | 0    |
| 0   | 0   | 0   | 0   | 0   | 0   | 0    |
| 0   | 0   | 0   | 0   | 0   | 0   | 0    |
| 0   | 0   | 0   | 0   | 1   | 0   | 0    |
| 0   | 0   | 0   | 0   | 4   | 0   | 0    |
| 0   | 0   | 0   | 0   | 0   | 0   | 0    |

|    |     |     |     |     |     |   |
|----|-----|-----|-----|-----|-----|---|
| 0  | 2   | 0   | 0   | 0   | 0   | 0 |
| 0  | 0   | 0   | 0   | 0   | 0   | 0 |
| 0  | 0   | 0   | 1   | 0   | 0   | 0 |
| 3  | 0   | 7   | 0   | 0   | 0   | 0 |
| 0  | 0   | 0   | 0   | 0   | 0   | 0 |
| 0  | 0   | 0   | 0   | 0   | 0   | 0 |
| 0  | 0   | 0   | 0   | 0   | 0   | 0 |
| 0  | 0   | 0   | 0   | 1   | 0   | 0 |
| 0  | 1   | 1   | 0   | 0   | 0   | 0 |
| 0  | 0   | 0   | 0   | 0   | 0   | 0 |
| 0  | 0   | 0   | 0   | 0   | 0   | 0 |
| 0  | 0   | 0   | 0   | 0   | 0   | 0 |
| 0  | 0   | 0   | 0   | 0   | 0   | 3 |
| 0  | 0   | 0   | 0   | 0   | 0   | 0 |
| 0  | 0   | 0   | 0   | 0   | 0   | 0 |
| 0  | 0   | 0   | 0   | 0   | 0   | 0 |
| 1  | 0   | 0   | 0   | 0   | 0   | 4 |
| 0  | 0   | 0   | 0   | 0   | 0   | 0 |
| 0  | 0   | 0   | 0   | 0   | 0   | 0 |
| 0  | 0   | 0   | 0   | 0   | 0   | 0 |
| 0  | 0   | 0   | 0   | 0   | 0   | 0 |
| 13 | 0   | 0   | 306 | 0   | 1   | 2 |
| 0  | 0   | 0   | 0   | 0   | 0   | 0 |
| 39 | 195 | 208 | 661 | 495 | 360 | 0 |
| 1  | 0   | 4   | 0   | 0   | 0   | 0 |
| 0  | 3   | 3   | 6   | 0   | 2   | 0 |
| 1  | 2   | 4   | 2   | 0   | 1   | 0 |
| 0  | 0   | 0   | 0   | 0   | 0   | 0 |
| 0  | 0   | 0   | 4   | 0   | 0   | 0 |
| 0  | 0   | 0   | 0   | 0   | 0   | 0 |
| 0  | 0   | 0   | 0   | 0   | 0   | 4 |
| 0  | 0   | 0   | 0   | 0   | 0   | 0 |
| 0  | 0   | 0   | 0   | 0   | 0   | 0 |
| 0  | 0   | 0   | 1   | 0   | 0   | 0 |
| 0  | 0   | 0   | 0   | 0   | 0   | 0 |
| 0  | 0   | 0   | 2   | 1   | 0   | 0 |
| 0  | 0   | 0   | 0   | 0   | 0   | 0 |
| 0  | 0   | 0   | 0   | 0   | 0   | 0 |
| 0  | 0   | 0   | 2   | 0   | 0   | 0 |
| 0  | 0   | 0   | 0   | 0   | 0   | 0 |
| 0  | 0   | 0   | 1   | 0   | 0   | 0 |
| 0  | 0   | 0   | 0   | 0   | 0   | 0 |
| 0  | 0   | 0   | 0   | 0   | 0   | 0 |
| 0  | 0   | 0   | 2   | 0   | 0   | 0 |
| 0  | 0   | 0   | 0   | 0   | 0   | 0 |
| 0  | 0   | 0   | 0   | 0   | 0   | 0 |
| 0  | 0   | 0   | 0   | 0   | 0   | 0 |
| 0  | 0   | 0   | 0   | 0   | 0   | 0 |
| 0  | 0   | 0   | 0   | 0   | 0   | 0 |
| 0  | 1   | 0   | 0   | 0   | 0   | 0 |

|      |      |      |      |      |      |    |
|------|------|------|------|------|------|----|
| 0    | 0    | 0    | 0    | 0    | 0    | 0  |
| 0    | 0    | 0    | 11   | 0    | 0    | 0  |
| 0    | 0    | 0    | 0    | 0    | 0    | 0  |
| 176  | 319  | 135  | 2    | 0    | 0    | 0  |
| 0    | 0    | 0    | 0    | 0    | 0    | 0  |
| 0    | 1    | 0    | 0    | 0    | 0    | 0  |
| 900  | 265  | 575  | 53   | 3    | 0    | 0  |
| 0    | 0    | 0    | 0    | 0    | 0    | 0  |
| 0    | 0    | 0    | 0    | 0    | 0    | 0  |
| 0    | 0    | 0    | 0    | 0    | 0    | 0  |
| 0    | 0    | 0    | 0    | 0    | 0    | 0  |
| 3239 | 2359 | 3255 | 9790 | 5894 | 4605 | 16 |
| 83   | 95   | 128  | 387  | 80   | 98   | 0  |
| 253  | 198  | 305  | 786  | 95   | 95   | 2  |
| 63   | 93   | 162  | 605  | 13   | 7    | 0  |
| 203  | 133  | 135  | 314  | 870  | 548  | 0  |
| 57   | 21   | 51   | 101  | 238  | 223  | 0  |
| 226  | 90   | 36   | 537  | 4    | 0    | 0  |
| 15   | 6    | 0    | 8    | 0    | 0    | 0  |
| 4    | 7    | 15   | 72   | 7    | 1    | 0  |
| 0    | 81   | 40   | 18   | 0    | 0    | 0  |
| 13   | 17   | 7    | 218  | 0    | 0    | 0  |
| 1    | 3    | 0    | 2    | 46   | 47   | 0  |
| 21   | 59   | 41   | 125  | 0    | 0    | 0  |
| 0    | 3    | 3    | 34   | 0    | 0    | 0  |
| 0    | 10   | 0    | 0    | 0    | 0    | 0  |
| 0    | 0    | 0    | 0    | 0    | 0    | 0  |
| 0    | 0    | 1    | 0    | 0    | 0    | 0  |
| 0    | 0    | 0    | 0    | 0    | 0    | 0  |
| 0    | 1    | 2    | 8    | 1    | 5    | 0  |
| 0    | 1    | 9    | 26   | 0    | 0    | 0  |
| 0    | 0    | 0    | 0    | 98   | 90   | 0  |
| 0    | 0    | 0    | 0    | 0    | 0    | 0  |
| 0    | 0    | 0    | 0    | 30   | 17   | 3  |
| 0    | 0    | 0    | 0    | 0    | 0    | 0  |
| 4    | 6    | 1    | 7    | 0    | 0    | 0  |
| 38   | 27   | 56   | 115  | 89   | 95   | 0  |
| 0    | 0    | 0    | 0    | 0    | 0    | 0  |
| 0    | 0    | 0    | 0    | 0    | 1    | 0  |
| 0    | 1    | 1    | 14   | 15   | 6    | 0  |
| 0    | 0    | 0    | 8    | 0    | 0    | 0  |
| 2    | 0    | 3    | 0    | 0    | 0    | 0  |
| 0    | 1    | 1    | 20   | 0    | 0    | 0  |
| 0    | 0    | 0    | 0    | 0    | 0    | 0  |
| 0    | 0    | 0    | 0    | 0    | 0    | 0  |
| 0    | 0    | 1    | 57   | 8    | 0    | 0  |
| 0    | 0    | 1    | 19   | 0    | 0    | 0  |
| 0    | 0    | 0    | 0    | 0    | 0    | 0  |

|    |   |    |    |    |   |   |
|----|---|----|----|----|---|---|
| 0  | 5 | 0  | 0  | 0  | 0 | 0 |
| 1  | 0 | 1  | 8  | 1  | 1 | 0 |
| 0  | 1 | 2  | 0  | 0  | 0 | 0 |
| 0  | 0 | 0  | 0  | 0  | 0 | 0 |
| 0  | 1 | 0  | 0  | 0  | 0 | 0 |
| 0  | 0 | 0  | 0  | 55 | 0 | 1 |
| 0  | 2 | 1  | 8  | 1  | 0 | 0 |
| 3  | 5 | 2  | 23 | 0  | 0 | 0 |
| 0  | 0 | 7  | 0  | 4  | 0 | 0 |
| 0  | 0 | 0  | 0  | 0  | 1 | 0 |
| 0  | 1 | 0  | 0  | 0  | 0 | 0 |
| 0  | 0 | 0  | 0  | 0  | 0 | 0 |
| 0  | 0 | 0  | 1  | 6  | 3 | 0 |
| 0  | 0 | 0  | 0  | 0  | 0 | 0 |
| 0  | 0 | 0  | 0  | 4  | 0 | 0 |
| 0  | 0 | 0  | 0  | 0  | 0 | 0 |
| 0  | 0 | 0  | 0  | 0  | 0 | 0 |
| 0  | 0 | 0  | 0  | 0  | 0 | 0 |
| 0  | 0 | 1  | 3  | 1  | 0 | 0 |
| 0  | 0 | 0  | 14 | 0  | 0 | 0 |
| 0  | 0 | 0  | 0  | 0  | 0 | 0 |
| 0  | 0 | 0  | 0  | 0  | 0 | 0 |
| 4  | 3 | 1  | 11 | 3  | 1 | 0 |
| 0  | 0 | 0  | 0  | 0  | 0 | 0 |
| 0  | 0 | 0  | 0  | 0  | 0 | 0 |
| 0  | 0 | 0  | 0  | 0  | 0 | 0 |
| 0  | 3 | 2  | 1  | 1  | 0 | 0 |
| 0  | 0 | 0  | 0  | 0  | 0 | 0 |
| 0  | 0 | 0  | 0  | 0  | 0 | 0 |
| 0  | 0 | 0  | 0  | 0  | 0 | 0 |
| 0  | 1 | 0  | 0  | 0  | 0 | 0 |
| 18 | 9 | 13 | 8  | 0  | 0 | 0 |
| 1  | 0 | 2  | 5  | 3  | 2 | 0 |
| 7  | 6 | 8  | 22 | 2  | 0 | 0 |
| 2  | 1 | 5  | 6  | 3  | 5 | 0 |
| 0  | 1 | 0  | 0  | 0  | 0 | 0 |
| 0  | 2 | 0  | 1  | 0  | 0 | 0 |
| 1  | 1 | 0  | 1  | 2  | 2 | 0 |
| 0  | 0 | 0  | 0  | 0  | 0 | 0 |
| 0  | 0 | 0  | 0  | 0  | 0 | 0 |
| 1  | 0 | 0  | 1  | 0  | 0 | 0 |
| 0  | 0 | 2  | 0  | 3  | 1 | 0 |
| 0  | 0 | 0  | 0  | 0  | 0 | 0 |
| 0  | 0 | 0  | 0  | 0  | 0 | 0 |
| 0  | 0 | 0  | 0  | 3  | 2 | 0 |
| 0  | 0 | 0  | 0  | 0  | 0 | 0 |
| 0  | 0 | 0  | 0  | 0  | 0 | 0 |
| 0  | 0 | 0  | 0  | 0  | 0 | 0 |
| 0  | 0 | 0  | 0  | 0  | 0 | 0 |
| 0  | 0 | 0  | 0  | 0  | 0 | 0 |

|     |    |    |     |   |   |   |
|-----|----|----|-----|---|---|---|
| 0   | 0  | 0  | 1   | 2 | 0 | 0 |
| 0   | 0  | 0  | 1   | 0 | 0 | 0 |
| 0   | 0  | 0  | 0   | 0 | 0 | 0 |
| 0   | 0  | 0  | 3   | 0 | 0 | 0 |
| 1   | 1  | 0  | 0   | 0 | 2 | 0 |
| 0   | 0  | 0  | 3   | 2 | 0 | 0 |
| 0   | 0  | 0  | 0   | 0 | 0 | 0 |
| 0   | 1  | 0  | 1   | 0 | 1 | 0 |
| 0   | 0  | 0  | 1   | 0 | 0 | 0 |
| 3   | 2  | 2  | 3   | 3 | 2 | 0 |
| 0   | 0  | 0  | 0   | 0 | 0 | 0 |
| 0   | 0  | 0  | 2   | 0 | 0 | 0 |
| 0   | 0  | 0  | 0   | 0 | 0 | 0 |
| 0   | 0  | 0  | 0   | 0 | 0 | 0 |
| 0   | 0  | 0  | 0   | 0 | 0 | 0 |
| 0   | 0  | 0  | 0   | 0 | 0 | 0 |
| 0   | 0  | 0  | 0   | 0 | 0 | 0 |
| 0   | 0  | 0  | 0   | 0 | 0 | 0 |
| 0   | 0  | 0  | 0   | 0 | 0 | 0 |
| 0   | 0  | 0  | 0   | 0 | 1 | 0 |
| 0   | 1  | 0  | 0   | 2 | 1 | 0 |
| 1   | 0  | 0  | 0   | 0 | 0 | 0 |
| 0   | 0  | 0  | 0   | 0 | 0 | 0 |
| 0   | 0  | 0  | 0   | 0 | 0 | 0 |
| 0   | 0  | 0  | 0   | 0 | 0 | 0 |
| 0   | 0  | 0  | 0   | 0 | 0 | 0 |
| 0   | 0  | 0  | 0   | 0 | 0 | 0 |
| 0   | 0  | 0  | 1   | 0 | 1 | 0 |
| 0   | 0  | 0  | 1   | 0 | 0 | 0 |
| 0   | 0  | 0  | 0   | 0 | 0 | 0 |
| 0   | 1  | 0  | 0   | 0 | 0 | 0 |
| 0   | 0  | 0  | 0   | 0 | 1 | 0 |
| 10  | 39 | 97 | 107 | 0 | 0 | 0 |
| 0   | 3  | 15 | 180 | 7 | 4 | 0 |
| 0   | 0  | 0  | 0   | 1 | 1 | 0 |
| 0   | 0  | 0  | 0   | 0 | 0 | 0 |
| 0   | 0  | 0  | 0   | 0 | 0 | 0 |
| 0   | 0  | 0  | 0   | 0 | 0 | 0 |
| 4   | 52 | 38 | 184 | 0 | 0 | 0 |
| 2   | 36 | 21 | 37  | 0 | 0 | 0 |
| 0   | 14 | 20 | 1   | 0 | 0 | 0 |
| 0   | 1  | 0  | 8   | 1 | 0 | 0 |
| 0   | 0  | 0  | 0   | 6 | 0 | 0 |
| 0   | 0  | 0  | 0   | 0 | 0 | 0 |
| 0   | 0  | 0  | 0   | 0 | 0 | 0 |
| 5   | 3  | 3  | 2   | 0 | 0 | 0 |
| 0   | 1  | 0  | 0   | 0 | 0 | 0 |
| 0   | 3  | 0  | 11  | 0 | 0 | 0 |
| 3   | 0  | 0  | 0   | 0 | 0 | 0 |
| 0   | 0  | 0  | 0   | 0 | 0 | 0 |
| 306 | 3  | 0  | 0   | 0 | 0 | 0 |

|     |     |     |     |    |    |   |
|-----|-----|-----|-----|----|----|---|
| 0   | 3   | 2   | 30  | 17 | 8  | 0 |
| 0   | 1   | 0   | 0   | 0  | 0  | 0 |
| 0   | 0   | 0   | 3   | 0  | 0  | 0 |
| 2   | 6   | 16  | 30  | 0  | 0  | 0 |
| 0   | 0   | 0   | 0   | 0  | 0  | 0 |
| 0   | 0   | 0   | 0   | 0  | 0  | 0 |
| 426 | 44  | 73  | 354 | 2  | 0  | 4 |
| 0   | 2   | 0   | 16  | 26 | 18 | 0 |
| 1   | 29  | 83  | 208 | 35 | 35 | 2 |
| 2   | 3   | 5   | 15  | 1  | 0  | 0 |
| 0   | 0   | 0   | 7   | 1  | 0  | 0 |
| 2   | 20  | 31  | 50  | 2  | 7  | 0 |
| 0   | 0   | 2   | 0   | 0  | 0  | 0 |
| 0   | 0   | 0   | 0   | 0  | 0  | 0 |
| 0   | 0   | 0   | 0   | 0  | 0  | 0 |
| 0   | 0   | 0   | 0   | 0  | 0  | 0 |
| 0   | 1   | 0   | 0   | 0  | 0  | 0 |
| 0   | 0   | 0   | 0   | 2  | 0  | 0 |
| 101 | 119 | 150 | 904 | 0  | 2  | 0 |
| 0   | 0   | 0   | 7   | 0  | 0  | 0 |
| 0   | 0   | 40  | 0   | 0  | 0  | 0 |
| 0   | 1   | 0   | 3   | 0  | 0  | 0 |
| 0   | 0   | 0   | 0   | 0  | 0  | 0 |
| 0   | 0   | 0   | 0   | 0  | 0  | 0 |
| 0   | 0   | 0   | 0   | 0  | 0  | 0 |
| 0   | 0   | 0   | 0   | 0  | 0  | 0 |
| 0   | 0   | 0   | 0   | 0  | 0  | 0 |
| 1   | 2   | 0   | 1   | 0  | 1  | 0 |
| 0   | 0   | 0   | 0   | 0  | 0  | 0 |
| 0   | 0   | 0   | 0   | 0  | 0  | 0 |
| 2   | 0   | 0   | 0   | 0  | 0  | 0 |
| 0   | 0   | 0   | 0   | 0  | 0  | 0 |
| 0   | 0   | 0   | 0   | 0  | 0  | 0 |
| 0   | 0   | 0   | 0   | 0  | 0  | 0 |
| 0   | 0   | 0   | 0   | 0  | 0  | 0 |
| 0   | 4   | 0   | 0   | 0  | 0  | 0 |
| 0   | 0   | 1   | 0   | 16 | 0  | 0 |
| 0   | 0   | 0   | 0   | 0  | 0  | 0 |
| 0   | 0   | 0   | 0   | 0  | 0  | 0 |
| 0   | 0   | 0   | 0   | 0  | 0  | 0 |
| 0   | 0   | 0   | 0   | 0  | 0  | 0 |
| 0   | 0   | 0   | 0   | 0  | 0  | 0 |
| 0   | 0   | 0   | 0   | 0  | 0  | 0 |
| 0   | 0   | 0   | 0   | 0  | 0  | 0 |
| 3   | 0   | 8   | 4   | 0  | 0  | 0 |
| 0   | 0   | 0   | 0   | 0  | 0  | 0 |
| 0   | 1   | 1   | 20  | 13 | 3  | 0 |
| 0   | 1   | 6   | 0   | 11 | 5  | 0 |
| 0   | 0   | 0   | 0   | 0  | 0  | 0 |
| 0   | 0   | 0   | 0   | 0  | 0  | 0 |
| 0   | 0   | 0   | 0   | 0  | 0  | 0 |
| 0   | 0   | 0   | 0   | 0  | 0  | 0 |



|      |     |      |      |     |     |    |
|------|-----|------|------|-----|-----|----|
| 0    | 1   | 1    | 0    | 9   | 0   | 1  |
| 0    | 0   | 0    | 0    | 0   | 0   | 0  |
| 12   | 7   | 7    | 70   | 4   | 13  | 25 |
| 0    | 0   | 0    | 0    | 0   | 0   | 0  |
| 0    | 0   | 0    | 0    | 0   | 0   | 0  |
| 0    | 0   | 0    | 0    | 0   | 0   | 0  |
| 0    | 0   | 0    | 0    | 0   | 0   | 0  |
| 0    | 0   | 0    | 0    | 0   | 0   | 0  |
| 0    | 0   | 0    | 0    | 0   | 0   | 0  |
| 0    | 0   | 0    | 0    | 3   | 0   | 0  |
| 0    | 0   | 0    | 0    | 1   | 0   | 0  |
| 0    | 0   | 0    | 0    | 0   | 0   | 0  |
| 0    | 0   | 0    | 0    | 0   | 0   | 0  |
| 0    | 0   | 0    | 0    | 1   | 0   | 0  |
| 0    | 0   | 0    | 0    | 0   | 0   | 0  |
| 0    | 0   | 0    | 0    | 0   | 0   | 0  |
| 0    | 0   | 0    | 0    | 0   | 0   | 0  |
| 0    | 0   | 0    | 0    | 0   | 0   | 0  |
| 0    | 0   | 0    | 0    | 0   | 0   | 0  |
| 2    | 0   | 0    | 3    | 0   | 0   | 0  |
| 8    | 13  | 32   | 19   | 0   | 0   | 0  |
| 0    | 0   | 0    | 0    | 0   | 0   | 0  |
| 0    | 7   | 0    | 0    | 1   | 0   | 0  |
| 0    | 0   | 0    | 0    | 0   | 0   | 0  |
| 0    | 0   | 1    | 0    | 12  | 11  | 9  |
| 9    | 4   | 0    | 4    | 9   | 5   | 0  |
| 0    | 1   | 0    | 0    | 0   | 0   | 0  |
| 0    | 0   | 0    | 0    | 0   | 0   | 0  |
| 0    | 15  | 0    | 0    | 0   | 26  | 0  |
| 0    | 0   | 0    | 0    | 0   | 0   | 0  |
| 3    | 0   | 1    | 2    | 0   | 0   | 0  |
| 0    | 0   | 0    | 0    | 0   | 0   | 0  |
| 16   | 6   | 2    | 19   | 0   | 0   | 0  |
| 0    | 0   | 0    | 0    | 0   | 0   | 0  |
| 0    | 0   | 0    | 0    | 0   | 0   | 0  |
| 0    | 0   | 0    | 0    | 0   | 0   | 0  |
| 0    | 0   | 0    | 0    | 1   | 0   | 0  |
| 0    | 0   | 0    | 0    | 0   | 0   | 0  |
| 0    | 0   | 0    | 0    | 0   | 0   | 0  |
| 0    | 0   | 0    | 0    | 0   | 0   | 0  |
| 189  | 76  | 131  | 298  | 58  | 31  | 2  |
| 0    | 0   | 0    | 0    | 0   | 0   | 0  |
| 1    | 0   | 0    | 1    | 0   | 0   | 0  |
| 2870 | 463 | 1246 | 1818 | 555 | 550 | 1  |
| 332  | 18  | 200  | 262  | 2   | 49  | 0  |
| 771  | 922 | 557  | 533  | 47  | 9   | 3  |
| 3598 | 682 | 192  | 6    | 1   | 41  | 3  |
| 2487 | 9   | 51   | 5    | 4   | 8   | 0  |

|     |     |    |     |    |    |    |
|-----|-----|----|-----|----|----|----|
| 0   | 1   | 0  | 2   | 1  | 0  | 0  |
| 150 | 8   | 20 | 7   | 13 | 16 | 0  |
| 47  | 15  | 63 | 127 | 19 | 23 | 0  |
| 53  | 301 | 43 | 115 | 0  | 0  | 0  |
| 112 | 7   | 40 | 22  | 0  | 0  | 0  |
| 87  | 0   | 1  | 0   | 2  | 0  | 0  |
| 0   | 0   | 26 | 84  | 1  | 2  | 0  |
| 0   | 0   | 0  | 0   | 0  | 0  | 0  |
| 9   | 2   | 0  | 1   | 4  | 2  | 0  |
| 2   | 0   | 6  | 0   | 0  | 0  | 0  |
| 5   | 0   | 24 | 7   | 0  | 0  | 0  |
| 4   | 1   | 0  | 4   | 0  | 0  | 0  |
| 0   | 2   | 0  | 1   | 0  | 0  | 2  |
| 2   | 0   | 0  | 4   | 0  | 0  | 0  |
| 0   | 0   | 0  | 0   | 0  | 0  | 0  |
| 0   | 0   | 0  | 0   | 0  | 5  | 0  |
| 0   | 0   | 1  | 0   | 8  | 2  | 0  |
| 4   | 14  | 2  | 11  | 0  | 0  | 0  |
| 0   | 0   | 0  | 0   | 0  | 0  | 0  |
| 3   | 2   | 0  | 5   | 2  | 8  | 0  |
| 0   | 0   | 0  | 0   | 0  | 0  | 0  |
| 1   | 7   | 0  | 10  | 0  | 1  | 0  |
| 0   | 0   | 0  | 0   | 0  | 0  | 0  |
| 0   | 0   | 0  | 0   | 29 | 10 | 36 |
| 0   | 0   | 0  | 0   | 0  | 0  | 0  |
| 0   | 0   | 1  | 0   | 3  | 1  | 0  |
| 0   | 0   | 0  | 0   | 1  | 0  | 0  |
| 0   | 0   | 0  | 0   | 0  | 0  | 0  |
| 0   | 0   | 0  | 0   | 0  | 0  | 0  |
| 0   | 0   | 0  | 0   | 0  | 0  | 0  |
| 0   | 0   | 0  | 0   | 0  | 0  | 0  |
| 0   | 0   | 0  | 0   | 0  | 0  | 0  |
| 0   | 0   | 0  | 0   | 0  | 0  | 0  |
| 0   | 0   | 0  | 0   | 0  | 0  | 0  |
| 2   | 0   | 0  | 0   | 0  | 0  | 0  |
| 0   | 1   | 0  | 0   | 2  | 1  | 0  |
| 0   | 0   | 0  | 0   | 0  | 0  | 0  |
| 45  | 1   | 0  | 0   | 0  | 0  | 0  |
| 0   | 0   | 0  | 0   | 0  | 0  | 0  |
| 0   | 2   | 0  | 0   | 1  | 0  | 0  |
| 0   | 0   | 0  | 0   | 4  | 10 | 0  |
| 0   | 0   | 0  | 0   | 0  | 0  | 0  |
| 0   | 0   | 0  | 0   | 0  | 0  | 0  |
| 0   | 0   | 0  | 0   | 0  | 0  | 0  |
| 2   | 0   | 0  | 0   | 0  | 2  | 0  |
| 0   | 0   | 0  | 0   | 0  | 0  | 0  |
| 0   | 0   | 0  | 0   | 0  | 0  | 0  |
| 0   | 0   | 0  | 0   | 1  | 0  | 0  |
| 0   | 0   | 0  | 0   | 0  | 0  | 0  |
| 0   | 0   | 0  | 0   | 0  | 0  | 0  |
| 0   | 0   | 0  | 0   | 0  | 0  | 0  |

|     |     |     |     |     |     |      |
|-----|-----|-----|-----|-----|-----|------|
| 1   | 1   | 1   | 0   | 0   | 1   | 0    |
| 0   | 0   | 1   | 0   | 0   | 0   | 0    |
| 0   | 0   | 0   | 0   | 0   | 0   | 0    |
| 0   | 0   | 0   | 0   | 0   | 0   | 0    |
| 0   | 0   | 0   | 0   | 0   | 0   | 0    |
| 18  | 2   | 8   | 13  | 5   | 9   | 0    |
| 0   | 0   | 0   | 0   | 0   | 0   | 0    |
| 147 | 240 | 165 | 556 | 380 | 344 | 3    |
| 1   | 0   | 3   | 1   | 3   | 4   | 0    |
| 0   | 0   | 0   | 0   | 1   | 0   | 0    |
| 0   | 0   | 0   | 0   | 0   | 0   | 0    |
| 0   | 0   | 7   | 0   | 0   | 0   | 0    |
| 0   | 0   | 17  | 0   | 0   | 0   | 0    |
| 0   | 0   | 0   | 0   | 0   | 0   | 0    |
| 0   | 0   | 8   | 0   | 60  | 8   | 1    |
| 0   | 16  | 0   | 0   | 15  | 0   | 0    |
| 1   | 0   | 0   | 0   | 0   | 0   | 0    |
| 0   | 0   | 0   | 0   | 0   | 0   | 0    |
| 0   | 0   | 0   | 0   | 0   | 0   | 0    |
| 0   | 0   | 0   | 0   | 0   | 0   | 0    |
| 0   | 0   | 0   | 0   | 0   | 0   | 0    |
| 0   | 0   | 1   | 0   | 0   | 0   | 0    |
| 0   | 0   | 1   | 0   | 0   | 0   | 0    |
| 0   | 0   | 0   | 0   | 0   | 0   | 0    |
| 0   | 0   | 7   | 0   | 0   | 0   | 0    |
| 0   | 0   | 0   | 0   | 0   | 0   | 0    |
| 0   | 0   | 0   | 0   | 0   | 0   | 0    |
| 0   | 0   | 0   | 0   | 0   | 0   | 0    |
| 0   | 0   | 0   | 0   | 0   | 0   | 0    |
| 0   | 0   | 0   | 0   | 0   | 0   | 0    |
| 0   | 1   | 1   | 4   | 21  | 36  | 0    |
| 17  | 7   | 5   | 26  | 8   | 0   | 0    |
| 0   | 0   | 0   | 0   | 38  | 14  | 0    |
| 0   | 0   | 0   | 0   | 257 | 25  | 6    |
| 0   | 0   | 0   | 0   | 0   | 0   | 118  |
| 0   | 0   | 0   | 0   | 0   | 0   | 0    |
| 4   | 49  | 6   | 0   | 0   | 0   | 0    |
| 118 | 43  | 41  | 0   | 13  | 1   | 3    |
| 1   | 0   | 0   | 1   | 133 | 26  | 298  |
| 0   | 0   | 0   | 0   | 412 | 97  | 0    |
| 0   | 0   | 0   | 0   | 0   | 0   | 0    |
| 0   | 0   | 0   | 0   | 0   | 0   | 0    |
| 0   | 0   | 0   | 0   | 0   | 0   | 0    |
| 23  | 0   | 0   | 0   | 0   | 0   | 3211 |
| 4   | 0   | 0   | 0   | 638 | 84  | 667  |
| 0   | 0   | 0   | 0   | 2   | 0   | 0    |
| 0   | 0   | 3   | 0   | 0   | 0   | 0    |
| 0   | 0   | 0   | 0   | 0   | 0   | 0    |
| 0   | 2   | 0   | 0   | 0   | 0   | 0    |



|     |     |     |     |      |     |      |
|-----|-----|-----|-----|------|-----|------|
| 0   | 0   | 0   | 0   | 0    | 0   | 0    |
| 273 | 51  | 13  | 139 | 63   | 42  | 0    |
| 141 | 22  | 30  | 156 | 9    | 1   | 0    |
| 24  | 7   | 7   | 31  | 5    | 1   | 0    |
| 8   | 0   | 0   | 4   | 4    | 5   | 11   |
| 0   | 0   | 0   | 0   | 0    | 0   | 0    |
| 9   | 0   | 0   | 1   | 72   | 49  | 0    |
| 0   | 0   | 0   | 0   | 0    | 0   | 0    |
| 0   | 0   | 0   | 0   | 0    | 0   | 0    |
| 65  | 7   | 1   | 25  | 7    | 0   | 0    |
| 4   | 3   | 0   | 32  | 0    | 0   | 0    |
| 0   | 0   | 0   | 1   | 0    | 0   | 0    |
| 0   | 0   | 0   | 0   | 0    | 0   | 0    |
| 0   | 0   | 0   | 0   | 0    | 0   | 0    |
| 0   | 0   | 0   | 5   | 0    | 0   | 0    |
| 0   | 0   | 0   | 2   | 0    | 1   | 0    |
| 0   | 0   | 0   | 1   | 0    | 1   | 0    |
| 0   | 0   | 0   | 0   | 55   | 24  | 0    |
| 0   | 0   | 0   | 0   | 0    | 1   | 0    |
| 1   | 0   | 0   | 0   | 0    | 0   | 0    |
| 7   | 4   | 0   | 1   | 22   | 8   | 0    |
| 0   | 1   | 3   | 3   | 0    | 0   | 0    |
| 4   | 3   | 0   | 0   | 1    | 0   | 0    |
| 0   | 0   | 0   | 0   | 0    | 0   | 0    |
| 0   | 0   | 0   | 0   | 0    | 0   | 0    |
| 0   | 0   | 0   | 0   | 0    | 0   | 0    |
| 0   | 0   | 0   | 0   | 0    | 0   | 0    |
| 0   | 0   | 0   | 0   | 0    | 0   | 0    |
| 0   | 0   | 0   | 0   | 0    | 0   | 0    |
| 0   | 0   | 0   | 0   | 0    | 0   | 0    |
| 0   | 0   | 0   | 0   | 0    | 0   | 0    |
| 0   | 0   | 0   | 0   | 0    | 0   | 0    |
| 0   | 0   | 0   | 1   | 0    | 0   | 0    |
| 8   | 0   | 0   | 3   | 0    | 0   | 0    |
| 0   | 0   | 0   | 0   | 0    | 0   | 0    |
| 43  | 259 | 15  | 88  | 155  | 23  | 0    |
| 101 | 21  | 9   | 243 | 699  | 278 | 3885 |
| 407 | 135 | 304 | 76  | 2189 | 253 | 0    |
| 83  | 37  | 11  | 171 | 6    | 59  | 0    |
| 9   | 0   | 1   | 71  | 0    | 0   | 0    |
| 2   | 0   | 6   | 24  | 0    | 0   | 0    |
| 33  | 31  | 31  | 34  | 2    | 0   | 0    |
| 33  | 31  | 29  | 49  | 20   | 13  | 0    |
| 13  | 7   | 2   | 0   | 0    | 0   | 0    |
| 56  | 11  | 6   | 54  | 32   | 18  | 0    |
| 0   | 2   | 3   | 2   | 0    | 0   | 0    |
| 10  | 8   | 4   | 124 | 53   | 59  | 0    |
| 0   | 0   | 3   | 26  | 6    | 1   | 0    |
| 0   | 2   | 0   | 0   | 0    | 8   | 0    |
| 0   | 0   | 0   | 8   | 0    | 1   | 0    |
| 3   | 0   | 0   | 1   | 0    | 0   | 0    |



|      |      |      |     |      |    |      |
|------|------|------|-----|------|----|------|
| 2109 | 1916 | 3226 | 121 | 8267 | 88 | 1130 |
| 54   | 72   | 39   | 9   | 38   | 3  | 1    |
| 0    | 0    | 0    | 0   | 3    | 4  | 0    |
| 0    | 0    | 0    | 0   | 0    | 0  | 0    |
| 46   | 24   | 9    | 3   | 6    | 0  | 0    |
| 0    | 0    | 0    | 0   | 22   | 0  | 1    |
| 0    | 0    | 0    | 0   | 0    | 0  | 0    |
| 0    | 0    | 1    | 0   | 0    | 0  | 0    |
| 0    | 0    | 0    | 0   | 0    | 0  | 0    |
| 0    | 0    | 0    | 0   | 0    | 0  | 0    |
| 0    | 0    | 0    | 0   | 0    | 0  | 0    |
| 0    | 0    | 0    | 0   | 0    | 0  | 0    |
| 78   | 27   | 161  | 4   | 223  | 0  | 0    |
| 16   | 23   | 44   | 0   | 0    | 0  | 0    |
| 773  | 106  | 41   | 3   | 3    | 0  | 1    |
| 0    | 0    | 0    | 0   | 0    | 0  | 21   |
| 0    | 0    | 0    | 0   | 0    | 0  | 0    |
| 0    | 0    | 0    | 0   | 0    | 0  | 0    |
| 0    | 0    | 0    | 0   | 0    | 0  | 0    |
| 87   | 16   | 2    | 0   | 706  | 4  | 0    |
| 7    | 0    | 0    | 0   | 7    | 0  | 0    |
| 0    | 0    | 0    | 0   | 0    | 0  | 0    |
| 2    | 1    | 0    | 0   | 11   | 0  | 0    |
| 2    | 0    | 0    | 0   | 0    | 0  | 0    |
| 35   | 30   | 12   | 76  | 53   | 18 | 6    |
| 0    | 0    | 0    | 0   | 0    | 0  | 0    |
| 0    | 0    | 0    | 0   | 0    | 0  | 0    |
| 323  | 72   | 23   | 6   | 45   | 14 | 0    |
| 31   | 12   | 12   | 24  | 99   | 68 | 0    |
| 489  | 35   | 5    | 9   | 141  | 43 | 2    |
| 164  | 15   | 15   | 26  | 68   | 23 | 0    |
| 1    | 2    | 37   | 0   | 1613 | 11 | 0    |
| 66   | 10   | 2    | 2   | 53   | 11 | 0    |
| 3    | 4    | 0    | 0   | 0    | 0  | 0    |
| 35   | 3    | 5    | 5   | 0    | 0  | 0    |
| 8    | 0    | 0    | 0   | 2    | 0  | 0    |
| 1    | 0    | 0    | 0   | 22   | 0  | 0    |
| 0    | 1    | 0    | 5   | 52   | 21 | 0    |
| 0    | 0    | 0    | 0   | 0    | 0  | 0    |
| 0    | 0    | 0    | 0   | 0    | 0  | 0    |
| 0    | 0    | 0    | 0   | 0    | 0  | 0    |
| 0    | 0    | 0    | 0   | 0    | 0  | 0    |
| 0    | 0    | 0    | 0   | 0    | 0  | 0    |
| 0    | 0    | 0    | 0   | 0    | 0  | 0    |
| 0    | 0    | 0    | 0   | 0    | 0  | 0    |
| 30   | 11   | 15   | 0   | 15   | 23 | 0    |
| 263  | 93   | 18   | 0   | 547  | 5  | 0    |
| 19   | 5    | 0    | 3   | 69   | 23 | 0    |
| 8    | 7    | 0    | 1   | 0    | 0  | 0    |
| 0    | 0    | 0    | 0   | 0    | 0  | 0    |

|      |     |     |     |       |     |       |
|------|-----|-----|-----|-------|-----|-------|
| 0    | 0   | 0   | 0   | 0     | 0   | 0     |
| 0    | 0   | 0   | 0   | 0     | 0   | 0     |
| 0    | 0   | 0   | 0   | 0     | 0   | 0     |
| 3    | 1   | 0   | 0   | 0     | 0   | 0     |
| 0    | 0   | 0   | 0   | 0     | 0   | 0     |
| 0    | 0   | 0   | 0   | 0     | 0   | 0     |
| 0    | 1   | 0   | 0   | 0     | 0   | 0     |
| 2    | 0   | 0   | 0   | 0     | 0   | 0     |
| 0    | 0   | 0   | 0   | 0     | 6   | 0     |
| 59   | 66  | 190 | 2   | 19    | 0   | 0     |
| 1    | 2   | 0   | 0   | 0     | 0   | 0     |
| 2    | 3   | 3   | 0   | 0     | 0   | 0     |
| 0    | 0   | 0   | 0   | 0     | 0   | 0     |
| 0    | 0   | 0   | 0   | 0     | 0   | 0     |
| 0    | 0   | 0   | 0   | 0     | 0   | 0     |
| 1433 | 713 | 101 | 19  | 694   | 18  | 3     |
| 305  | 221 | 100 | 0   | 564   | 11  | 0     |
| 2    | 0   | 0   | 0   | 1     | 0   | 0     |
| 2    | 0   | 0   | 0   | 0     | 0   | 0     |
| 0    | 0   | 0   | 0   | 0     | 0   | 0     |
| 4    | 4   | 0   | 0   | 6     | 0   | 0     |
| 0    | 2   | 0   | 0   | 0     | 0   | 0     |
| 0    | 0   | 0   | 0   | 0     | 0   | 0     |
| 0    | 0   | 0   | 0   | 0     | 0   | 0     |
| 39   | 10  | 1   | 0   | 21    | 0   | 0     |
| 0    | 0   | 0   | 0   | 0     | 0   | 0     |
| 4    | 1   | 0   | 1   | 3     | 0   | 0     |
| 0    | 0   | 0   | 0   | 0     | 0   | 0     |
| 7    | 8   | 3   | 0   | 3     | 0   | 0     |
| 0    | 3   | 1   | 0   | 39    | 10  | 0     |
| 24   | 33  | 5   | 0   | 0     | 0   | 0     |
| 141  | 167 | 47  | 3   | 52    | 0   | 0     |
| 51   | 12  | 1   | 18  | 22    | 8   | 1     |
| 0    | 0   | 0   | 0   | 0     | 0   | 0     |
| 0    | 0   | 0   | 0   | 0     | 0   | 0     |
| 0    | 0   | 0   | 0   | 0     | 0   | 0     |
| 0    | 1   | 0   | 0   | 0     | 0   | 0     |
| 0    | 0   | 0   | 0   | 0     | 0   | 0     |
| 1916 | 426 | 252 | 220 | 11736 | 340 | 23931 |
| 61   | 29  | 103 | 0   | 20    | 5   | 21    |
| 87   | 95  | 263 | 3   | 511   | 30  | 0     |
| 15   | 11  | 16  | 36  | 5     | 0   | 0     |
| 82   | 71  | 73  | 1   | 9     | 0   | 0     |
| 0    | 0   | 0   | 3   | 0     | 0   | 0     |
| 0    | 0   | 0   | 0   | 14    | 1   | 0     |
| 0    | 0   | 0   | 1   | 0     | 0   | 0     |
| 0    | 0   | 1   | 0   | 0     | 0   | 0     |
| 2    | 0   | 7   | 0   | 1     | 0   | 0     |



|     |     |    |    |      |    |   |
|-----|-----|----|----|------|----|---|
| 0   | 0   | 0  | 0  | 0    | 0  | 6 |
| 0   | 0   | 0  | 0  | 0    | 0  | 0 |
| 0   | 0   | 0  | 0  | 0    | 0  | 0 |
| 0   | 0   | 0  | 1  | 0    | 0  | 0 |
| 1   | 0   | 0  | 0  | 0    | 0  | 0 |
| 0   | 0   | 0  | 0  | 0    | 0  | 0 |
| 0   | 0   | 0  | 0  | 0    | 0  | 0 |
| 0   | 0   | 0  | 0  | 0    | 0  | 0 |
| 0   | 0   | 0  | 0  | 0    | 0  | 0 |
| 3   | 0   | 0  | 0  | 3    | 1  | 1 |
| 0   | 0   | 0  | 0  | 0    | 0  | 0 |
| 0   | 0   | 21 | 0  | 0    | 0  | 1 |
| 0   | 0   | 0  | 0  | 0    | 0  | 0 |
| 0   | 0   | 0  | 0  | 0    | 0  | 0 |
| 45  | 18  | 0  | 2  | 25   | 1  | 0 |
| 9   | 1   | 0  | 0  | 17   | 15 | 0 |
| 49  | 17  | 21 | 40 | 4    | 5  | 0 |
| 0   | 0   | 0  | 0  | 2    | 0  | 0 |
| 0   | 0   | 0  | 0  | 0    | 0  | 0 |
| 0   | 0   | 0  | 0  | 0    | 0  | 1 |
| 0   | 0   | 0  | 2  | 0    | 0  | 0 |
| 0   | 0   | 0  | 0  | 0    | 0  | 0 |
| 0   | 0   | 0  | 0  | 0    | 0  | 0 |
| 0   | 0   | 0  | 0  | 0    | 0  | 0 |
| 0   | 0   | 0  | 0  | 0    | 0  | 0 |
| 207 | 129 | 43 | 16 | 1082 | 16 | 0 |
| 110 | 67  | 29 | 0  | 116  | 2  | 0 |
| 0   | 0   | 8  | 0  | 5    | 0  | 0 |
| 0   | 0   | 0  | 0  | 0    | 0  | 1 |
| 0   | 0   | 0  | 1  | 1    | 0  | 0 |
| 1   | 1   | 1  | 6  | 36   | 16 | 0 |
| 2   | 0   | 0  | 0  | 1    | 0  | 0 |
| 0   | 0   | 0  | 0  | 0    | 0  | 0 |
| 0   | 2   | 0  | 0  | 0    | 0  | 0 |
| 0   | 0   | 0  | 0  | 0    | 0  | 0 |
| 0   | 0   | 0  | 0  | 0    | 0  | 0 |
| 0   | 0   | 0  | 0  | 0    | 0  | 0 |
| 0   | 0   | 0  | 0  | 0    | 0  | 0 |
| 0   | 0   | 0  | 0  | 0    | 0  | 0 |
| 0   | 0   | 0  | 0  | 0    | 0  | 0 |
| 0   | 0   | 0  | 0  | 0    | 0  | 0 |
| 0   | 0   | 0  | 0  | 0    | 0  | 0 |
| 0   | 0   | 0  | 0  | 0    | 0  | 0 |
| 0   | 0   | 0  | 0  | 0    | 0  | 1 |
| 0   | 0   | 0  | 0  | 0    | 0  | 0 |
| 0   | 0   | 3  | 0  | 45   | 15 | 2 |
| 29  | 7   | 3  | 25 | 1    | 0  | 0 |
| 5   | 0   | 0  | 0  | 0    | 0  | 0 |
| 0   | 0   | 0  | 0  | 0    | 0  | 0 |
| 0   | 0   | 0  | 0  | 0    | 0  | 0 |
| 0   | 0   | 0  | 0  | 0    | 0  | 0 |

|      |     |     |      |      |     |      |
|------|-----|-----|------|------|-----|------|
| 0    | 0   | 0   | 0    | 0    | 0   | 0    |
| 0    | 0   | 0   | 0    | 0    | 0   | 0    |
| 1729 | 445 | 346 | 1495 | 1062 | 923 | 1929 |
| 70   | 9   | 7   | 235  | 1141 | 219 | 0    |
| 558  | 363 | 360 | 596  | 640  | 376 | 0    |
| 56   | 21  | 78  | 354  | 35   | 120 | 0    |
| 352  | 292 | 98  | 386  | 298  | 196 | 129  |
| 437  | 83  | 259 | 712  | 935  | 207 | 0    |
| 349  | 5   | 11  | 67   | 28   | 59  | 0    |
| 26   | 3   | 10  | 68   | 10   | 6   | 0    |
| 40   | 24  | 36  | 76   | 0    | 0   | 0    |
| 3    | 0   | 17  | 72   | 0    | 0   | 0    |
| 11   | 16  | 10  | 100  | 37   | 31  | 0    |
| 35   | 31  | 28  | 59   | 0    | 19  | 0    |
| 150  | 150 | 103 | 186  | 174  | 109 | 0    |
| 86   | 36  | 107 | 206  | 118  | 77  | 0    |
| 129  | 22  | 21  | 138  | 2    | 3   | 0    |
| 4    | 10  | 77  | 41   | 180  | 88  | 0    |
| 138  | 68  | 40  | 46   | 2    | 2   | 0    |
| 7    | 2   | 24  | 30   | 12   | 4   | 0    |
| 37   | 2   | 29  | 51   | 430  | 193 | 0    |
| 0    | 0   | 0   | 0    | 99   | 57  | 173  |
| 18   | 43  | 14  | 42   | 32   | 16  | 0    |
| 34   | 14  | 5   | 19   | 5    | 8   | 1    |
| 4    | 8   | 2   | 12   | 2    | 0   | 0    |
| 12   | 19  | 18  | 14   | 11   | 15  | 0    |
| 25   | 8   | 12  | 11   | 2    | 0   | 0    |
| 0    | 3   | 0   | 0    | 0    | 0   | 0    |
| 0    | 0   | 0   | 5    | 0    | 0   | 0    |
| 11   | 13  | 3   | 14   | 0    | 0   | 0    |
| 6    | 12  | 8   | 18   | 6    | 1   | 0    |
| 94   | 0   | 9   | 11   | 2    | 0   | 0    |
| 1    | 0   | 0   | 0    | 5    | 0   | 0    |
| 4    | 1   | 26  | 27   | 9    | 6   | 0    |
| 1    | 3   | 7   | 22   | 2    | 2   | 0    |
| 1    | 0   | 9   | 30   | 6    | 12  | 0    |
| 0    | 0   | 0   | 1    | 0    | 0   | 0    |
| 5    | 5   | 4   | 0    | 0    | 0   | 0    |
| 0    | 0   | 0   | 5    | 0    | 0   | 0    |
| 0    | 0   | 0   | 0    | 0    | 0   | 0    |
| 0    | 0   | 0   | 0    | 0    | 0   | 0    |
| 0    | 0   | 0   | 0    | 0    | 0   | 0    |
| 0    | 0   | 0   | 0    | 0    | 0   | 0    |
| 0    | 0   | 0   | 0    | 0    | 0   | 0    |
| 0    | 0   | 0   | 0    | 0    | 0   | 0    |
| 1    | 0   | 0   | 10   | 0    | 0   | 0    |
| 1    | 1   | 1   | 0    | 0    | 1   | 0    |
| 0    | 2   | 0   | 0    | 1    | 0   | 0    |
| 0    | 0   | 0   | 0    | 0    | 0   | 0    |
| 0    | 0   | 0   | 0    | 0    | 0   | 0    |



|      |     |     |      |      |      |      |
|------|-----|-----|------|------|------|------|
| 0    | 0   | 0   | 0    | 0    | 0    | 0    |
| 0    | 0   | 0   | 0    | 0    | 0    | 0    |
| 0    | 0   | 0   | 0    | 0    | 0    | 0    |
| 38   | 26  | 10  | 168  | 31   | 12   | 1    |
| 0    | 0   | 0   | 0    | 0    | 0    | 0    |
| 10   | 5   | 3   | 7    | 0    | 0    | 0    |
| 0    | 0   | 0   | 0    | 0    | 0    | 0    |
| 0    | 0   | 0   | 0    | 0    | 0    | 0    |
| 448  | 89  | 31  | 754  | 1933 | 628  | 170  |
| 2262 | 613 | 229 | 3246 | 3841 | 1505 | 2554 |
| 24   | 7   | 10  | 122  | 277  | 81   | 4026 |
| 17   | 2   | 0   | 0    | 581  | 134  | 0    |
| 232  | 61  | 41  | 269  | 651  | 282  | 3    |
| 38   | 12  | 5   | 87   | 145  | 45   | 1506 |
| 0    | 1   | 0   | 0    | 0    | 1    | 0    |
| 13   | 5   | 1   | 10   | 13   | 4    | 14   |
| 15   | 7   | 0   | 1    | 0    | 0    | 0    |
| 25   | 3   | 0   | 14   | 33   | 4    | 0    |
| 16   | 1   | 1   | 20   | 0    | 0    | 0    |
| 123  | 12  | 0   | 41   | 34   | 8    | 0    |
| 2    | 1   | 1   | 2    | 47   | 24   | 0    |
| 7    | 12  | 10  | 124  | 38   | 15   | 0    |
| 18   | 10  | 1   | 12   | 0    | 0    | 1    |
| 0    | 0   | 0   | 0    | 0    | 0    | 0    |
| 0    | 0   | 0   | 0    | 3    | 2    | 0    |
| 2    | 0   | 1   | 6    | 3    | 2    | 0    |
| 3    | 1   | 0   | 5    | 4    | 1    | 0    |
| 10   | 3   | 0   | 69   | 21   | 7    | 3    |
| 2    | 0   | 0   | 2    | 4    | 2    | 0    |
| 0    | 0   | 0   | 0    | 0    | 0    | 77   |
| 1    | 1   | 0   | 0    | 0    | 4    | 0    |
| 0    | 0   | 0   | 0    | 0    | 0    | 0    |
| 4    | 1   | 0   | 6    | 10   | 1    | 3    |
| 0    | 0   | 0   | 1    | 2    | 3    | 1    |
| 0    | 0   | 0   | 0    | 0    | 0    | 0    |
| 0    | 0   | 0   | 0    | 0    | 0    | 0    |
| 0    | 1   | 0   | 1    | 1    | 2    | 0    |
| 0    | 0   | 0   | 0    | 0    | 0    | 0    |
| 0    | 0   | 0   | 0    | 3    | 0    | 0    |
| 0    | 0   | 0   | 0    | 0    | 0    | 2    |
| 0    | 0   | 0   | 3    | 0    | 0    | 0    |
| 0    | 0   | 0   | 0    | 0    | 0    | 0    |
| 0    | 0   | 0   | 5    | 0    | 0    | 0    |
| 0    | 0   | 0   | 0    | 0    | 0    | 0    |
| 0    | 1   | 0   | 1    | 0    | 0    | 0    |
| 0    | 0   | 0   | 0    | 0    | 0    | 0    |
| 0    | 0   | 0   | 0    | 0    | 0    | 3    |
| 0    | 0   | 0   | 0    | 0    | 0    | 0    |



|     |    |    |     |     |     |   |
|-----|----|----|-----|-----|-----|---|
| 0   | 0  | 0  | 0   | 0   | 0   | 0 |
| 397 | 93 | 42 | 602 | 378 | 187 | 0 |
| 49  | 22 | 11 | 83  | 82  | 28  | 8 |
| 49  | 12 | 2  | 34  | 48  | 14  | 0 |
| 32  | 4  | 3  | 2   | 0   | 0   | 0 |
| 18  | 11 | 5  | 43  | 1   | 4   | 0 |
| 16  | 8  | 3  | 32  | 6   | 3   | 0 |
| 25  | 2  | 10 | 26  | 15  | 8   | 0 |
| 9   | 1  | 1  | 10  | 0   | 0   | 0 |
| 71  | 19 | 6  | 163 | 27  | 8   | 0 |
| 6   | 2  | 2  | 20  | 7   | 2   | 0 |
| 6   | 6  | 1  | 10  | 2   | 3   | 0 |
| 0   | 0  | 0  | 0   | 0   | 0   | 5 |
| 0   | 0  | 0  | 0   | 0   | 0   | 0 |
| 1   | 1  | 0  | 2   | 0   | 1   | 0 |
| 0   | 0  | 0  | 0   | 40  | 21  | 0 |
| 16  | 6  | 4  | 41  | 5   | 3   | 0 |
| 1   | 0  | 1  | 1   | 0   | 1   | 0 |
| 0   | 0  | 0  | 1   | 0   | 0   | 0 |
| 1   | 1  | 0  | 1   | 0   | 0   | 0 |
| 2   | 2  | 0  | 2   | 0   | 1   | 0 |
| 2   | 0  | 0  | 3   | 1   | 0   | 1 |
| 0   | 0  | 0  | 4   | 5   | 2   | 1 |
| 0   | 0  | 0  | 0   | 0   | 0   | 0 |
| 0   | 0  | 0  | 0   | 0   | 0   | 0 |
| 1   | 0  | 0  | 1   | 1   | 0   | 0 |
| 0   | 0  | 0  | 0   | 0   | 0   | 0 |
| 0   | 0  | 0  | 0   | 1   | 0   | 0 |
| 0   | 0  | 0  | 0   | 0   | 0   | 0 |
| 5   | 0  | 0  | 1   | 0   | 1   | 0 |
| 1   | 0  | 0  | 0   | 0   | 0   | 0 |
| 0   | 0  | 0  | 0   | 0   | 0   | 0 |
| 0   | 0  | 0  | 0   | 0   | 0   | 0 |
| 1   | 0  | 0  | 0   | 0   | 0   | 0 |
| 0   | 0  | 0  | 0   | 0   | 0   | 0 |
| 0   | 0  | 0  | 0   | 0   | 0   | 0 |
| 412 | 34 | 41 | 644 | 154 | 71  | 2 |
| 18  | 12 | 27 | 129 | 4   | 0   | 1 |
| 49  | 3  | 2  | 10  | 0   | 0   | 0 |
| 0   | 0  | 0  | 0   | 0   | 0   | 0 |
| 2   | 3  | 0  | 35  | 0   | 0   | 0 |
| 0   | 0  | 0  | 1   | 0   | 0   | 0 |
| 0   | 0  | 0  | 2   | 0   | 0   | 0 |
| 1   | 0  | 3  | 48  | 0   | 0   | 0 |
| 0   | 0  | 0  | 0   | 0   | 0   | 0 |
| 0   | 1  | 0  | 0   | 0   | 0   | 0 |
| 0   | 0  | 0  | 0   | 0   | 0   | 0 |
| 0   | 0  | 0  | 0   | 8   | 1   | 0 |

|     |    |    |     |     |    |    |
|-----|----|----|-----|-----|----|----|
| 0   | 0  | 0  | 2   | 1   | 0  | 0  |
| 0   | 0  | 0  | 0   | 0   | 0  | 0  |
| 0   | 0  | 0  | 0   | 23  | 3  | 0  |
| 0   | 0  | 0  | 0   | 0   | 0  | 0  |
| 0   | 0  | 0  | 0   | 0   | 0  | 0  |
| 0   | 0  | 0  | 0   | 0   | 0  | 0  |
| 0   | 0  | 0  | 0   | 0   | 0  | 0  |
| 0   | 0  | 0  | 0   | 0   | 0  | 0  |
| 0   | 0  | 0  | 0   | 0   | 0  | 0  |
| 0   | 0  | 0  | 0   | 0   | 0  | 0  |
| 0   | 0  | 0  | 1   | 0   | 0  | 0  |
| 0   | 0  | 0  | 0   | 0   | 0  | 0  |
| 0   | 0  | 0  | 0   | 0   | 0  | 0  |
| 0   | 0  | 0  | 1   | 8   | 0  | 0  |
| 0   | 0  | 0  | 0   | 0   | 0  | 0  |
| 0   | 0  | 0  | 0   | 0   | 0  | 0  |
| 0   | 0  | 0  | 0   | 0   | 0  | 0  |
| 0   | 0  | 0  | 0   | 0   | 0  | 0  |
| 4   | 3  | 11 | 31  | 2   | 0  | 0  |
| 0   | 0  | 0  | 0   | 0   | 0  | 0  |
| 0   | 0  | 0  | 0   | 0   | 0  | 0  |
| 0   | 0  | 0  | 2   | 0   | 0  | 0  |
| 0   | 0  | 2  | 0   | 0   | 0  | 0  |
| 0   | 0  | 0  | 0   | 0   | 0  | 0  |
| 0   | 0  | 3  | 0   | 0   | 0  | 0  |
| 0   | 0  | 0  | 0   | 0   | 0  | 0  |
| 0   | 0  | 0  | 0   | 0   | 0  | 0  |
| 0   | 0  | 0  | 0   | 0   | 0  | 0  |
| 0   | 0  | 0  | 0   | 0   | 0  | 0  |
| 0   | 0  | 0  | 0   | 0   | 0  | 0  |
| 0   | 0  | 0  | 1   | 192 | 50 | 29 |
| 0   | 0  | 0  | 1   | 1   | 0  | 0  |
| 25  | 0  | 0  | 0   | 0   | 0  | 0  |
| 0   | 0  | 0  | 0   | 0   | 0  | 0  |
| 0   | 0  | 0  | 0   | 0   | 0  | 0  |
| 213 | 19 | 10 | 39  | 40  | 24 | 1  |
| 3   | 1  | 0  | 0   | 0   | 0  | 0  |
| 3   | 1  | 0  | 0   | 19  | 14 | 0  |
| 1   | 0  | 0  | 0   | 3   | 0  | 0  |
| 142 | 10 | 5  | 9   | 0   | 0  | 0  |
| 0   | 0  | 0  | 0   | 0   | 0  | 0  |
| 0   | 0  | 0  | 0   | 0   | 0  | 14 |
| 0   | 0  | 0  | 0   | 1   | 0  | 0  |
| 0   | 0  | 0  | 0   | 0   | 0  | 0  |
| 53  | 0  | 0  | 4   | 203 | 99 | 0  |
| 0   | 0  | 0  | 0   | 0   | 0  | 0  |
| 20  | 0  | 0  | 3   | 18  | 12 | 0  |
| 0   | 0  | 0  | 0   | 0   | 0  | 0  |
| 0   | 0  | 0  | 0   | 0   | 0  | 0  |
| 35  | 22 | 11 | 152 | 55  | 11 | 0  |

|     |    |     |     |     |    |   |
|-----|----|-----|-----|-----|----|---|
| 0   | 0  | 0   | 0   | 0   | 0  | 0 |
| 294 | 31 | 28  | 192 | 16  | 20 | 0 |
| 72  | 7  | 12  | 40  | 52  | 16 | 0 |
| 0   | 0  | 0   | 0   | 11  | 2  | 0 |
| 1   | 0  | 0   | 0   | 0   | 2  | 0 |
| 1   | 1  | 0   | 0   | 0   | 4  | 0 |
| 0   | 0  | 0   | 0   | 0   | 0  | 0 |
| 0   | 0  | 0   | 0   | 0   | 0  | 0 |
| 0   | 0  | 0   | 0   | 0   | 0  | 0 |
| 145 | 58 | 47  | 242 | 166 | 67 | 1 |
| 119 | 21 | 11  | 74  | 26  | 13 | 1 |
| 35  | 31 | 100 | 0   | 8   | 0  | 0 |
| 0   | 0  | 0   | 1   | 0   | 0  | 0 |
| 0   | 0  | 0   | 0   | 7   | 3  | 0 |
| 0   | 0  | 0   | 0   | 0   | 0  | 0 |
| 0   | 0  | 0   | 0   | 0   | 0  | 0 |
| 0   | 0  | 1   | 5   | 0   | 0  | 0 |
| 0   | 0  | 0   | 0   | 0   | 0  | 0 |
| 0   | 0  | 0   | 0   | 3   | 0  | 0 |
| 0   | 0  | 0   | 6   | 0   | 0  | 0 |
| 0   | 0  | 0   | 0   | 0   | 0  | 0 |
| 0   | 0  | 0   | 0   | 0   | 0  | 0 |
| 0   | 0  | 0   | 0   | 8   | 3  | 0 |
| 0   | 0  | 0   | 0   | 0   | 0  | 0 |
| 0   | 0  | 0   | 0   | 0   | 0  | 0 |
| 0   | 0  | 0   | 0   | 0   | 0  | 0 |
| 0   | 0  | 0   | 0   | 0   | 0  | 0 |
| 0   | 0  | 0   | 0   | 0   | 0  | 0 |
| 0   | 0  | 0   | 0   | 0   | 0  | 0 |
| 0   | 0  | 0   | 0   | 0   | 0  | 0 |
| 0   | 0  | 6   | 0   | 0   | 0  | 0 |
| 0   | 0  | 0   | 0   | 0   | 0  | 0 |
| 19  | 1  | 2   | 1   | 0   | 0  | 0 |
| 0   | 0  | 0   | 0   | 0   | 0  | 0 |
| 0   | 0  | 0   | 0   | 0   | 0  | 0 |
| 4   | 10 | 1   | 0   | 11  | 32 | 0 |
| 0   | 0  | 0   | 0   | 0   | 9  | 0 |
| 0   | 0  | 0   | 0   | 0   | 0  | 0 |
| 12  | 0  | 0   | 0   | 0   | 0  | 0 |
| 0   | 0  | 0   | 0   | 0   | 0  | 0 |
| 0   | 0  | 0   | 0   | 0   | 0  | 0 |
| 9   | 20 | 11  | 38  | 0   | 0  | 0 |
| 7   | 3  | 2   | 4   | 0   | 0  | 0 |
| 0   | 0  | 0   | 0   | 0   | 0  | 0 |
| 0   | 0  | 0   | 0   | 0   | 0  | 0 |
| 0   | 0  | 0   | 0   | 0   | 0  | 0 |
| 0   | 0  | 0   | 0   | 2   | 0  | 0 |
| 0   | 0  | 0   | 0   | 0   | 0  | 0 |
| 0   | 0  | 0   | 0   | 0   | 0  | 0 |



|    |     |     |     |    |   |   |
|----|-----|-----|-----|----|---|---|
| 0  | 1   | 0   | 0   | 0  | 0 | 0 |
| 0  | 0   | 0   | 0   | 0  | 0 | 0 |
| 0  | 0   | 0   | 0   | 0  | 0 | 0 |
| 1  | 1   | 0   | 0   | 0  | 0 | 0 |
| 0  | 0   | 0   | 0   | 0  | 0 | 1 |
| 0  | 0   | 0   | 0   | 0  | 0 | 0 |
| 84 | 127 | 171 | 17  | 16 | 5 | 0 |
| 0  | 0   | 0   | 0   | 2  | 0 | 0 |
| 0  | 0   | 0   | 2   | 2  | 0 | 0 |
| 0  | 0   | 0   | 0   | 0  | 0 | 0 |
| 0  | 1   | 0   | 0   | 0  | 0 | 0 |
| 0  | 0   | 0   | 0   | 0  | 0 | 0 |
| 0  | 0   | 0   | 0   | 0  | 0 | 0 |
| 0  | 0   | 0   | 0   | 0  | 0 | 0 |
| 74 | 224 | 67  | 509 | 12 | 8 | 0 |
| 0  | 0   | 0   | 0   | 0  | 0 | 0 |
| 0  | 0   | 0   | 0   | 0  | 0 | 0 |
| 0  | 0   | 0   | 0   | 0  | 0 | 0 |
| 0  | 0   | 0   | 0   | 0  | 0 | 0 |
| 0  | 0   | 0   | 0   | 0  | 0 | 0 |
| 0  | 0   | 0   | 0   | 0  | 0 | 0 |
| 0  | 0   | 0   | 0   | 0  | 0 | 0 |
| 0  | 0   | 0   | 0   | 0  | 0 | 0 |
| 1  | 3   | 0   | 1   | 0  | 0 | 0 |
| 0  | 0   | 0   | 0   | 0  | 0 | 0 |
| 0  | 1   | 0   | 0   | 0  | 0 | 0 |
| 1  | 0   | 0   | 0   | 0  | 0 | 0 |
| 0  | 0   | 0   | 0   | 0  | 0 | 0 |

| 68.SUR | 68.DCM | 70.SUR | 72.SUR | 72.DCM | 76.SUR | 76.DCM |     |
|--------|--------|--------|--------|--------|--------|--------|-----|
| 0      |        | 0      | 0      | 0      | 0      | 0      | 0   |
| 0      |        | 0      | 0      | 0      | 1      | 0      | 0   |
| 0      |        | 0      | 0      | 0      | 0      | 0      | 0   |
| 0      |        | 0      | 0      | 0      | 0      | 0      | 2   |
| 0      |        | 0      | 0      | 0      | 0      | 1      | 0   |
| 0      |        | 0      | 0      | 0      | 0      | 0      | 0   |
| 0      |        | 0      | 0      | 0      | 0      | 0      | 0   |
| 0      |        | 1      | 0      | 0      | 37     | 1      | 2   |
| 0      |        | 0      | 1      | 0      | 6      | 0      | 2   |
| 0      |        | 0      | 0      | 0      | 0      | 0      | 0   |
| 1      |        | 0      | 0      | 0      | 0      | 0      | 0   |
| 0      |        | 0      | 0      | 0      | 0      | 0      | 0   |
| 0      |        | 0      | 0      | 0      | 0      | 0      | 0   |
| 0      |        | 0      | 0      | 0      | 0      | 0      | 0   |
| 0      |        | 0      | 0      | 0      | 0      | 0      | 1   |
| 0      |        | 0      | 0      | 0      | 0      | 0      | 0   |
| 2      |        | 1      | 2      | 11     | 2      | 5      | 156 |
| 63     |        | 424    | 133    | 272    | 259    | 415    | 110 |
| 0      |        | 5      | 1      | 1      | 2      | 6      | 0   |
| 0      |        | 0      | 0      | 6      | 0      | 2      | 23  |
| 0      |        | 0      | 0      | 2      | 9      | 7      | 16  |
| 0      |        | 0      | 0      | 0      | 0      | 0      | 0   |
| 0      |        | 0      | 0      | 0      | 0      | 1      | 3   |
| 0      |        | 3      | 0      | 0      | 0      | 0      | 0   |
| 0      |        | 0      | 0      | 0      | 0      | 0      | 0   |
| 0      |        | 0      | 0      | 0      | 0      | 0      | 0   |
| 0      |        | 0      | 0      | 0      | 0      | 0      | 0   |
| 0      |        | 0      | 0      | 0      | 0      | 4      | 0   |
| 0      |        | 0      | 0      | 0      | 0      | 0      | 0   |
| 0      |        | 0      | 0      | 0      | 2      | 0      | 1   |
| 0      |        | 0      | 0      | 0      | 0      | 0      | 0   |
| 0      |        | 0      | 0      | 0      | 0      | 0      | 0   |
| 0      |        | 0      | 0      | 0      | 0      | 0      | 0   |
| 0      |        | 17     | 2      | 0      | 37     | 0      | 4   |
| 0      |        | 0      | 0      | 0      | 3      | 0      | 0   |
| 0      |        | 0      | 0      | 0      | 4      | 0      | 0   |
| 0      |        | 0      | 0      | 0      | 0      | 0      | 0   |
| 5      |        | 11     | 0      | 1      | 1      | 7      | 0   |
| 22     |        | 8      | 2      | 648    | 45     | 220    | 56  |
| 181    |        | 41     | 0      | 5340   | 209    | 2223   | 98  |
| 0      |        | 0      | 0      | 1      | 0      | 0      | 7   |
| 4      |        | 10     | 12     | 0      | 39     | 3      | 341 |
| 4      |        | 61     | 4      | 0      | 6      | 3      | 0   |
| 2      |        | 0      | 4      | 19     | 24     | 0      | 1   |
| 1      |        | 6      | 15     | 1      | 11     | 0      | 127 |
| 3      |        | 69     | 29     | 4      | 26     | 0      | 22  |
| 0      |        | 0      | 0      | 0      | 32     | 0      | 224 |
| 1      |        | 31     | 4      | 0      | 21     | 0      | 26  |

|      |    |    |   |      |    |      |
|------|----|----|---|------|----|------|
| 0    | 11 | 3  | 0 | 17   | 0  | 7    |
| 0    | 1  | 4  | 1 | 16   | 0  | 15   |
| 0    | 0  | 2  | 1 | 4    | 0  | 0    |
| 0    | 0  | 0  | 0 | 63   | 0  | 15   |
| 0    | 0  | 5  | 0 | 10   | 1  | 9    |
| 0    | 1  | 0  | 0 | 0    | 0  | 0    |
| 0    | 0  | 0  | 0 | 5    | 0  | 1    |
| 0    | 0  | 0  | 4 | 1    | 0  | 0    |
| 0    | 0  | 0  | 0 | 0    | 2  | 0    |
| 0    | 0  | 0  | 0 | 0    | 0  | 12   |
| 3    | 20 | 7  | 3 | 0    | 0  | 0    |
| 0    | 0  | 0  | 0 | 0    | 0  | 30   |
| 0    | 0  | 1  | 0 | 0    | 0  | 0    |
| 2    | 6  | 1  | 5 | 2    | 1  | 2    |
| 0    | 0  | 0  | 0 | 3    | 0  | 2    |
| 0    | 0  | 0  | 0 | 0    | 0  | 0    |
| 0    | 0  | 0  | 0 | 0    | 0  | 0    |
| 3    | 0  | 0  | 0 | 0    | 0  | 0    |
| 0    | 0  | 0  | 0 | 0    | 0  | 0    |
| 0    | 0  | 0  | 0 | 0    | 0  | 0    |
| 0    | 0  | 0  | 0 | 0    | 0  | 0    |
| 0    | 0  | 0  | 0 | 0    | 0  | 0    |
| 0    | 0  | 0  | 0 | 0    | 0  | 0    |
| 0    | 0  | 0  | 0 | 0    | 0  | 0    |
| 0    | 1  | 0  | 0 | 0    | 0  | 0    |
| 0    | 0  | 0  | 0 | 0    | 0  | 0    |
| 0    | 0  | 0  | 0 | 0    | 0  | 0    |
| 0    | 0  | 0  | 0 | 0    | 0  | 0    |
| 0    | 0  | 0  | 0 | 0    | 0  | 0    |
| 0    | 0  | 0  | 0 | 0    | 0  | 0    |
| 0    | 0  | 0  | 0 | 0    | 0  | 0    |
| 0    | 0  | 0  | 0 | 0    | 0  | 0    |
| 0    | 0  | 0  | 0 | 15   | 0  | 5    |
| 0    | 0  | 0  | 0 | 0    | 0  | 10   |
| 1    | 0  | 0  | 4 | 0    | 3  | 0    |
| 0    | 0  | 0  | 0 | 0    | 0  | 0    |
| 0    | 0  | 0  | 0 | 0    | 0  | 0    |
| 0    | 0  | 0  | 3 | 1    | 0  | 0    |
| 0    | 0  | 0  | 0 | 0    | 0  | 0    |
| 0    | 0  | 2  | 0 | 0    | 0  | 0    |
| 0    | 0  | 0  | 0 | 0    | 0  | 7    |
| 0    | 0  | 0  | 0 | 0    | 0  | 0    |
| 5    | 14 | 23 | 5 | 1104 | 67 | 2633 |
| 1049 | 70 | 85 | 0 | 0    | 1  | 6    |
| 15   | 8  | 1  | 1 | 7    | 12 | 34   |
| 0    | 0  | 0  | 0 | 92   | 0  | 259  |
| 0    | 0  | 4  | 0 | 0    | 0  | 0    |
| 0    | 0  | 0  | 1 | 0    | 0  | 7    |
| 0    | 0  | 0  | 0 | 0    | 0  | 27   |
| 0    | 0  | 0  | 0 | 0    | 0  | 0    |
| 1    | 0  | 0  | 0 | 0    | 0  | 0    |

|    |    |    |    |    |    |    |
|----|----|----|----|----|----|----|
| 0  | 0  | 0  | 0  | 0  | 0  | 0  |
| 0  | 0  | 0  | 0  | 0  | 0  | 0  |
| 0  | 0  | 0  | 0  | 0  | 0  | 0  |
| 0  | 0  | 1  | 0  | 0  | 0  | 0  |
| 0  | 0  | 0  | 0  | 0  | 0  | 0  |
| 3  | 11 | 36 | 0  | 0  | 1  | 1  |
| 0  | 0  | 0  | 0  | 0  | 0  | 0  |
| 0  | 0  | 0  | 0  | 0  | 0  | 0  |
| 0  | 0  | 0  | 0  | 0  | 0  | 0  |
| 0  | 0  | 0  | 0  | 0  | 0  | 0  |
| 0  | 0  | 0  | 1  | 0  | 0  | 0  |
| 0  | 0  | 0  | 0  | 0  | 0  | 0  |
| 0  | 0  | 0  | 0  | 0  | 0  | 0  |
| 0  | 0  | 0  | 0  | 0  | 0  | 0  |
| 0  | 0  | 0  | 0  | 0  | 0  | 0  |
| 0  | 0  | 0  | 0  | 0  | 0  | 0  |
| 0  | 1  | 0  | 0  | 0  | 1  | 1  |
| 0  | 0  | 0  | 0  | 0  | 1  | 0  |
| 0  | 0  | 0  | 0  | 0  | 0  | 0  |
| 3  | 0  | 2  | 0  | 0  | 2  | 0  |
| 0  | 0  | 0  | 0  | 0  | 0  | 0  |
| 0  | 0  | 0  | 0  | 0  | 0  | 0  |
| 0  | 0  | 2  | 0  | 15 | 1  | 7  |
| 1  | 7  | 1  | 0  | 6  | 0  | 22 |
| 0  | 0  | 0  | 0  | 0  | 0  | 0  |
| 3  | 0  | 0  | 14 | 6  | 61 | 0  |
| 0  | 2  | 0  | 0  | 0  | 0  | 0  |
| 0  | 0  | 0  | 8  | 13 | 1  | 15 |
| 1  | 0  | 0  | 11 | 0  | 0  | 0  |
| 0  | 1  | 0  | 1  | 0  | 0  | 1  |
| 0  | 0  | 0  | 0  | 0  | 0  | 0  |
| 0  | 0  | 0  | 0  | 0  | 0  | 0  |
| 0  | 0  | 0  | 1  | 0  | 0  | 0  |
| 0  | 0  | 0  | 0  | 6  | 0  | 19 |
| 0  | 6  | 1  | 0  | 11 | 0  | 9  |
| 0  | 2  | 0  | 0  | 48 | 0  | 18 |
| 7  | 2  | 0  | 1  | 0  | 0  | 0  |
| 0  | 0  | 0  | 0  | 0  | 0  | 0  |
| 0  | 0  | 0  | 0  | 0  | 0  | 0  |
| 0  | 1  | 0  | 0  | 2  | 0  | 8  |
| 16 | 0  | 0  | 0  | 0  | 0  | 0  |
| 0  | 0  | 0  | 0  | 0  | 0  | 1  |
| 0  | 0  | 0  | 0  | 0  | 0  | 4  |
| 0  | 0  | 0  | 0  | 0  | 0  | 0  |
| 22 | 0  | 0  | 0  | 0  | 1  | 0  |
| 0  | 0  | 0  | 0  | 0  | 0  | 0  |
| 0  | 0  | 0  | 0  | 1  | 0  | 0  |
| 0  | 0  | 0  | 0  | 0  | 0  | 0  |

|     |     |     |     |     |   |     |
|-----|-----|-----|-----|-----|---|-----|
| 0   | 1   | 0   | 0   | 1   | 0 | 10  |
| 0   | 0   | 0   | 0   | 0   | 0 | 0   |
| 63  | 131 | 25  | 140 | 107 | 1 | 5   |
| 0   | 0   | 0   | 0   | 0   | 0 | 0   |
| 0   | 0   | 0   | 0   | 0   | 0 | 1   |
| 0   | 0   | 0   | 0   | 0   | 0 | 0   |
| 0   | 0   | 0   | 0   | 0   | 0 | 0   |
| 0   | 0   | 0   | 0   | 0   | 0 | 0   |
| 0   | 0   | 0   | 0   | 0   | 0 | 2   |
| 0   | 0   | 0   | 0   | 0   | 0 | 0   |
| 0   | 0   | 0   | 0   | 6   | 0 | 0   |
| 0   | 0   | 0   | 0   | 3   | 0 | 11  |
| 43  | 77  | 50  | 36  | 64  | 7 | 182 |
| 3   | 0   | 0   | 0   | 0   | 0 | 0   |
| 0   | 73  | 3   | 0   | 13  | 1 | 4   |
| 0   | 0   | 0   | 0   | 8   | 0 | 13  |
| 0   | 0   | 3   | 0   | 6   | 1 | 15  |
| 0   | 5   | 0   | 0   | 9   | 1 | 8   |
| 0   | 0   | 0   | 0   | 0   | 0 | 0   |
| 0   | 1   | 0   | 1   | 1   | 0 | 0   |
| 3   | 5   | 11  | 0   | 0   | 5 | 2   |
| 0   | 0   | 0   | 0   | 3   | 0 | 0   |
| 0   | 0   | 0   | 0   | 0   | 0 | 0   |
| 0   | 0   | 0   | 0   | 0   | 0 | 0   |
| 0   | 0   | 2   | 0   | 0   | 0 | 0   |
| 0   | 0   | 0   | 0   | 0   | 0 | 0   |
| 0   | 0   | 0   | 0   | 0   | 0 | 0   |
| 0   | 0   | 0   | 0   | 0   | 0 | 0   |
| 0   | 0   | 0   | 0   | 0   | 0 | 0   |
| 0   | 0   | 0   | 0   | 0   | 0 | 0   |
| 0   | 0   | 0   | 0   | 1   | 0 | 0   |
| 0   | 0   | 0   | 0   | 0   | 0 | 0   |
| 0   | 1   | 0   | 1   | 23  | 1 | 210 |
| 0   | 0   | 0   | 0   | 0   | 0 | 0   |
| 0   | 0   | 0   | 0   | 0   | 0 | 0   |
| 0   | 0   | 0   | 0   | 0   | 0 | 2   |
| 0   | 0   | 0   | 0   | 12  | 0 | 0   |
| 0   | 0   | 0   | 0   | 0   | 0 | 0   |
| 0   | 0   | 0   | 0   | 0   | 0 | 0   |
| 0   | 0   | 0   | 27  | 14  | 0 | 0   |
| 26  | 19  | 0   | 0   | 6   | 0 | 0   |
| 0   | 0   | 0   | 0   | 0   | 0 | 0   |
| 0   | 0   | 0   | 0   | 0   | 0 | 0   |
| 17  | 0   | 17  | 13  | 3   | 8 | 1   |
| 533 | 28  | 59  | 20  | 67  | 0 | 42  |
| 806 | 8   | 43  | 4   | 750 | 5 | 8   |
| 0   | 0   | 0   | 0   | 0   | 0 | 0   |
| 577 | 17  | 260 | 4   | 436 | 2 | 17  |
| 103 | 0   | 10  | 0   | 4   | 0 | 5   |

|     |    |      |     |       |    |     |
|-----|----|------|-----|-------|----|-----|
| 6   | 2  | 1    | 0   | 0     | 0  | 0   |
| 0   | 0  | 0    | 0   | 0     | 0  | 0   |
| 0   | 0  | 0    | 0   | 0     | 0  | 0   |
| 0   | 2  | 0    | 0   | 0     | 3  | 0   |
| 0   | 1  | 0    | 0   | 0     | 1  | 0   |
| 0   | 0  | 0    | 0   | 0     | 0  | 0   |
| 0   | 1  | 0    | 0   | 0     | 0  | 0   |
| 13  | 0  | 0    | 0   | 0     | 0  | 0   |
| 0   | 0  | 0    | 0   | 0     | 0  | 0   |
| 0   | 0  | 2    | 0   | 3     | 0  | 0   |
| 0   | 0  | 0    | 0   | 0     | 0  | 0   |
| 0   | 0  | 0    | 0   | 0     | 0  | 0   |
| 0   | 0  | 0    | 0   | 0     | 0  | 0   |
| 0   | 0  | 5    | 0   | 6     | 0  | 0   |
| 10  | 1  | 0    | 0   | 0     | 0  | 0   |
| 0   | 0  | 0    | 0   | 0     | 0  | 0   |
| 5   | 0  | 0    | 0   | 0     | 0  | 0   |
| 0   | 0  | 0    | 0   | 0     | 0  | 2   |
| 0   | 0  | 0    | 0   | 3     | 1  | 1   |
| 0   | 0  | 26   | 0   | 665   | 0  | 10  |
| 8   | 6  | 15   | 0   | 8     | 0  | 7   |
| 0   | 0  | 0    | 0   | 0     | 0  | 1   |
| 0   | 0  | 0    | 0   | 0     | 0  | 0   |
| 206 | 28 | 7529 | 133 | 11350 | 13 | 79  |
| 22  | 19 | 32   | 15  | 8     | 2  | 2   |
| 0   | 0  | 0    | 0   | 0     | 0  | 0   |
| 0   | 0  | 0    | 0   | 0     | 0  | 0   |
| 1   | 0  | 0    | 0   | 0     | 0  | 0   |
| 0   | 1  | 0    | 0   | 0     | 0  | 0   |
| 0   | 0  | 1    | 0   | 1     | 0  | 0   |
| 0   | 0  | 0    | 0   | 0     | 0  | 0   |
| 0   | 0  | 0    | 0   | 2     | 0  | 0   |
| 0   | 0  | 0    | 0   | 0     | 0  | 0   |
| 0   | 0  | 0    | 0   | 1     | 0  | 0   |
| 0   | 0  | 1    | 0   | 0     | 0  | 0   |
| 2   | 0  | 0    | 0   | 5     | 0  | 0   |
| 31  | 47 | 312  | 14  | 1138  | 25 | 592 |
| 0   | 1  | 89   | 5   | 466   | 4  | 16  |
| 1   | 0  | 14   | 0   | 0     | 0  | 0   |
| 0   | 0  | 2    | 39  | 5     | 1  | 1   |
| 1   | 0  | 0    | 0   | 7     | 0  | 0   |
| 326 | 4  | 0    | 0   | 0     | 3  | 0   |
| 0   | 0  | 0    | 0   | 0     | 0  | 0   |
| 0   | 0  | 0    | 0   | 0     | 0  | 0   |
| 0   | 0  | 0    | 0   | 0     | 0  | 0   |
| 16  | 1  | 35   | 1   | 57    | 10 | 0   |
| 122 | 1  | 1    | 0   | 0     | 0  | 0   |
| 70  | 7  | 0    | 0   | 1     | 0  | 4   |

|    |     |    |    |     |     |     |
|----|-----|----|----|-----|-----|-----|
| 15 | 1   | 1  | 0  | 6   | 0   | 0   |
| 1  | 0   | 0  | 0  | 0   | 0   | 0   |
| 0  | 0   | 0  | 0  | 0   | 0   | 0   |
| 0  | 0   | 0  | 0  | 0   | 0   | 0   |
| 0  | 0   | 0  | 0  | 0   | 0   | 0   |
| 0  | 0   | 0  | 0  | 0   | 0   | 0   |
| 0  | 0   | 0  | 0  | 0   | 0   | 0   |
| 0  | 0   | 0  | 0  | 2   | 0   | 0   |
| 0  | 0   | 2  | 0  | 0   | 0   | 1   |
| 29 | 0   | 0  | 0  | 2   | 0   | 0   |
| 0  | 0   | 0  | 0  | 0   | 0   | 0   |
| 0  | 0   | 0  | 0  | 1   | 0   | 0   |
| 0  | 0   | 0  | 0  | 0   | 0   | 0   |
| 7  | 0   | 0  | 0  | 0   | 0   | 0   |
| 0  | 0   | 0  | 0  | 0   | 0   | 0   |
| 0  | 0   | 0  | 0  | 0   | 0   | 0   |
| 0  | 0   | 0  | 0  | 1   | 0   | 0   |
| 0  | 0   | 0  | 0  | 0   | 0   | 0   |
| 0  | 0   | 0  | 0  | 0   | 0   | 0   |
| 0  | 0   | 0  | 0  | 0   | 0   | 0   |
| 1  | 0   | 0  | 7  | 4   | 9   | 1   |
| 0  | 0   | 0  | 0  | 0   | 0   | 0   |
| 19 | 412 | 85 | 67 | 971 | 107 | 578 |
| 0  | 0   | 0  | 0  | 0   | 0   | 0   |
| 0  | 8   | 2  | 1  | 5   | 5   | 5   |
| 3  | 6   | 15 | 4  | 1   | 1   | 0   |
| 0  | 0   | 0  | 0  | 0   | 0   | 0   |
| 0  | 0   | 0  | 0  | 1   | 0   | 0   |
| 0  | 1   | 0  | 0  | 0   | 0   | 0   |
| 0  | 0   | 0  | 0  | 0   | 0   | 0   |
| 0  | 0   | 0  | 0  | 0   | 0   | 0   |
| 0  | 0   | 0  | 0  | 0   | 0   | 0   |
| 0  | 0   | 0  | 0  | 3   | 1   | 1   |
| 0  | 0   | 0  | 0  | 3   | 1   | 3   |
| 0  | 0   | 0  | 0  | 1   | 0   | 0   |
| 0  | 0   | 0  | 0  | 0   | 0   | 0   |
| 0  | 0   | 0  | 0  | 0   | 0   | 0   |
| 0  | 0   | 0  | 0  | 0   | 0   | 11  |
| 0  | 0   | 0  | 0  | 0   | 0   | 0   |
| 0  | 0   | 1  | 2  | 4   | 0   | 0   |
| 0  | 0   | 0  | 0  | 0   | 0   | 5   |
| 0  | 0   | 0  | 0  | 0   | 0   | 0   |
| 0  | 0   | 0  | 0  | 0   | 0   | 0   |
| 0  | 0   | 0  | 0  | 0   | 0   | 0   |
| 0  | 0   | 0  | 0  | 2   | 0   | 0   |
| 0  | 0   | 0  | 0  | 0   | 0   | 0   |
| 0  | 0   | 0  | 0  | 0   | 0   | 1   |
| 1  | 0   | 0  | 0  | 0   | 0   | 0   |

|      |      |       |      |      |      |      |
|------|------|-------|------|------|------|------|
| 0    | 0    | 0     | 0    | 0    | 0    | 0    |
| 0    | 0    | 0     | 0    | 0    | 0    | 1    |
| 3    | 0    | 0     | 3    | 0    | 0    | 0    |
| 5    | 0    | 2     | 48   | 8    | 14   | 3    |
| 0    | 0    | 0     | 0    | 0    | 1    | 0    |
| 0    | 0    | 0     | 0    | 0    | 0    | 0    |
| 109  | 1    | 630   | 202  | 452  | 91   | 48   |
| 0    | 0    | 0     | 0    | 0    | 0    | 0    |
| 0    | 0    | 0     | 0    | 0    | 0    | 0    |
| 0    | 0    | 0     | 0    | 0    | 0    | 0    |
| 0    | 0    | 0     | 0    | 0    | 0    | 0    |
| 4019 | 7599 | 14610 | 6768 | 6718 | 2017 | 2957 |
| 259  | 461  | 526   | 72   | 160  | 2    | 68   |
| 17   | 35   | 76    | 68   | 673  | 11   | 147  |
| 4    | 5    | 9     | 41   | 461  | 4    | 33   |
| 128  | 181  | 352   | 30   | 205  | 17   | 113  |
| 18   | 38   | 48    | 279  | 170  | 73   | 115  |
| 0    | 23   | 24    | 0    | 5    | 4    | 17   |
| 19   | 20   | 5     | 26   | 110  | 75   | 17   |
| 0    | 0    | 2     | 0    | 294  | 5    | 111  |
| 0    | 0    | 0     | 0    | 1    | 7    | 73   |
| 0    | 0    | 0     | 0    | 36   | 4    | 109  |
| 5    | 1    | 0     | 1    | 0    | 1    | 0    |
| 0    | 0    | 0     | 0    | 41   | 0    | 39   |
| 0    | 149  | 0     | 1    | 31   | 0    | 52   |
| 0    | 0    | 0     | 1    | 0    | 0    | 0    |
| 0    | 0    | 0     | 0    | 0    | 0    | 0    |
| 0    | 0    | 0     | 0    | 27   | 0    | 12   |
| 0    | 0    | 0     | 1    | 10   | 1    | 62   |
| 0    | 2    | 0     | 1    | 16   | 0    | 8    |
| 0    | 0    | 0     | 0    | 28   | 1    | 49   |
| 2    | 10   | 0     | 0    | 0    | 0    | 0    |
| 0    | 0    | 0     | 0    | 0    | 0    | 0    |
| 1    | 0    | 2     | 0    | 3    | 0    | 4    |
| 0    | 0    | 0     | 0    | 0    | 0    | 0    |
| 0    | 0    | 15    | 74   | 2    | 26   | 9    |
| 69   | 107  | 442   | 212  | 91   | 39   | 77   |
| 0    | 2    | 0     | 3    | 36   | 0    | 0    |
| 0    | 0    | 0     | 1    | 7    | 0    | 0    |
| 1    | 1    | 35    | 0    | 0    | 1    | 0    |
| 0    | 0    | 0     | 0    | 1    | 0    | 5    |
| 0    | 0    | 0     | 0    | 12   | 0    | 1    |
| 5    | 83   | 3     | 0    | 64   | 1    | 19   |
| 0    | 1    | 0     | 0    | 1    | 0    | 120  |
| 0    | 0    | 0     | 0    | 0    | 0    | 0    |
| 0    | 0    | 0     | 0    | 14   | 3    | 6    |
| 0    | 0    | 0     | 0    | 10   | 0    | 14   |
| 0    | 0    | 0     | 0    | 0    | 0    | 18   |



|   |    |    |    |    |    |    |
|---|----|----|----|----|----|----|
| 0 | 0  | 0  | 0  | 0  | 0  | 1  |
| 1 | 4  | 9  | 3  | 38 | 3  | 42 |
| 0 | 0  | 0  | 0  | 12 | 0  | 63 |
| 0 | 0  | 0  | 2  | 0  | 8  | 0  |
| 0 | 0  | 0  | 0  | 16 | 0  | 2  |
| 0 | 0  | 59 | 0  | 0  | 0  | 0  |
| 0 | 27 | 5  | 0  | 32 | 0  | 4  |
| 0 | 0  | 15 | 0  | 31 | 0  | 5  |
| 0 | 0  | 1  | 0  | 14 | 1  | 1  |
| 0 | 1  | 0  | 0  | 0  | 0  | 5  |
| 0 | 0  | 0  | 0  | 0  | 0  | 0  |
| 0 | 0  | 0  | 0  | 0  | 0  | 0  |
| 6 | 8  | 0  | 0  | 0  | 0  | 0  |
| 1 | 0  | 0  | 1  | 0  | 1  | 1  |
| 0 | 0  | 3  | 0  | 12 | 0  | 7  |
| 0 | 0  | 1  | 0  | 0  | 0  | 26 |
| 0 | 0  | 0  | 0  | 0  | 0  | 0  |
| 0 | 0  | 0  | 0  | 4  | 0  | 3  |
| 1 | 0  | 0  | 41 | 0  | 22 | 0  |
| 1 | 0  | 0  | 1  | 0  | 0  | 0  |
| 0 | 0  | 0  | 0  | 0  | 0  | 0  |
| 4 | 1  | 1  | 6  | 17 | 7  | 4  |
| 0 | 0  | 0  | 0  | 0  | 0  | 0  |
| 0 | 0  | 0  | 3  | 0  | 0  | 0  |
| 0 | 0  | 0  | 0  | 0  | 0  | 0  |
| 0 | 1  | 4  | 0  | 0  | 0  | 0  |
| 0 | 0  | 0  | 0  | 2  | 0  | 13 |
| 0 | 0  | 0  | 0  | 0  | 0  | 0  |
| 0 | 0  | 0  | 0  | 0  | 0  | 0  |
| 0 | 0  | 0  | 0  | 0  | 0  | 0  |
| 1 | 1  | 1  | 0  | 5  | 1  | 15 |
| 1 | 7  | 29 | 1  | 1  | 1  | 1  |
| 1 | 0  | 4  | 2  | 5  | 1  | 5  |
| 2 | 3  | 19 | 11 | 4  | 3  | 3  |
| 0 | 0  | 0  | 0  | 11 | 0  | 12 |
| 0 | 1  | 0  | 1  | 3  | 0  | 1  |
| 0 | 0  | 3  | 2  | 11 | 0  | 1  |
| 0 | 0  | 1  | 0  | 3  | 0  | 3  |
| 0 | 0  | 0  | 0  | 3  | 0  | 1  |
| 0 | 1  | 0  | 0  | 0  | 0  | 0  |
| 0 | 0  | 0  | 0  | 0  | 0  | 4  |
| 0 | 0  | 0  | 0  | 0  | 0  | 0  |
| 0 | 0  | 0  | 0  | 0  | 0  | 0  |
| 0 | 1  | 0  | 0  | 0  | 0  | 1  |
| 0 | 0  | 0  | 0  | 0  | 0  | 1  |
| 0 | 0  | 0  | 0  | 0  | 0  | 0  |
| 0 | 0  | 0  | 0  | 0  | 0  | 0  |
| 0 | 0  | 0  | 0  | 0  | 0  | 1  |

|   |     |    |   |    |    |     |
|---|-----|----|---|----|----|-----|
| 0 | 0   | 1  | 2 | 3  | 3  | 1   |
| 0 | 2   | 6  | 0 | 0  | 0  | 0   |
| 0 | 0   | 0  | 0 | 0  | 0  | 0   |
| 0 | 2   | 3  | 0 | 0  | 0  | 0   |
| 4 | 3   | 8  | 0 | 0  | 0  | 1   |
| 0 | 3   | 0  | 0 | 0  | 0  | 1   |
| 0 | 0   | 0  | 0 | 0  | 0  | 0   |
| 2 | 1   | 2  | 1 | 2  | 2  | 0   |
| 0 | 0   | 0  | 0 | 0  | 0  | 0   |
| 1 | 3   | 11 | 7 | 9  | 1  | 1   |
| 0 | 0   | 0  | 0 | 0  | 0  | 0   |
| 0 | 0   | 0  | 0 | 0  | 0  | 0   |
| 0 | 0   | 0  | 0 | 0  | 0  | 0   |
| 0 | 0   | 0  | 0 | 4  | 0  | 3   |
| 0 | 0   | 0  | 0 | 0  | 0  | 0   |
| 0 | 0   | 0  | 0 | 0  | 0  | 0   |
| 0 | 0   | 0  | 3 | 0  | 0  | 0   |
| 0 | 0   | 1  | 0 | 0  | 0  | 0   |
| 0 | 0   | 0  | 1 | 0  | 0  | 0   |
| 0 | 0   | 0  | 0 | 0  | 0  | 0   |
| 0 | 0   | 0  | 0 | 0  | 0  | 1   |
| 0 | 0   | 0  | 0 | 0  | 0  | 0   |
| 0 | 0   | 1  | 1 | 0  | 0  | 0   |
| 0 | 0   | 0  | 0 | 0  | 0  | 0   |
| 0 | 0   | 3  | 0 | 0  | 0  | 0   |
| 0 | 0   | 0  | 0 | 0  | 0  | 0   |
| 0 | 0   | 0  | 0 | 0  | 0  | 0   |
| 0 | 0   | 0  | 0 | 0  | 0  | 0   |
| 0 | 0   | 0  | 0 | 0  | 0  | 0   |
| 0 | 0   | 0  | 0 | 0  | 0  | 0   |
| 0 | 0   | 0  | 0 | 0  | 0  | 0   |
| 0 | 0   | 0  | 0 | 0  | 0  | 0   |
| 0 | 0   | 0  | 0 | 0  | 0  | 0   |
| 0 | 0   | 0  | 0 | 0  | 0  | 0   |
| 0 | 0   | 0  | 0 | 0  | 0  | 0   |
| 0 | 0   | 0  | 0 | 0  | 0  | 0   |
| 1 | 18  | 4  | 0 | 7  | 2  | 13  |
| 0 | 0   | 0  | 0 | 0  | 0  | 1   |
| 0 | 0   | 0  | 0 | 2  | 0  | 9   |
| 0 | 0   | 0  | 0 | 0  | 0  | 0   |
| 0 | 0   | 0  | 0 | 0  | 0  | 0   |
| 0 | 0   | 0  | 0 | 0  | 0  | 0   |
| 2 | 61  | 64 | 0 | 80 | 1  | 22  |
| 2 | 327 | 0  | 0 | 42 | 1  | 923 |
| 0 | 0   | 0  | 0 | 3  | 2  | 495 |
| 0 | 1   | 7  | 0 | 16 | 0  | 153 |
| 0 | 0   | 0  | 0 | 30 | 0  | 20  |
| 0 | 0   | 0  | 0 | 0  | 0  | 0   |
| 0 | 1   | 0  | 0 | 0  | 0  | 5   |
| 2 | 0   | 6  | 0 | 14 | 19 | 87  |
| 0 | 0   | 0  | 0 | 0  | 0  | 0   |
| 0 | 0   | 0  | 0 | 7  | 0  | 0   |
| 0 | 0   | 7  | 0 | 2  | 0  | 0   |
| 0 | 0   | 0  | 0 | 0  | 0  | 0   |
| 0 | 0   | 0  | 1 | 0  | 0  | 0   |

|    |    |    |      |     |    |     |
|----|----|----|------|-----|----|-----|
| 7  | 27 | 5  | 0    | 30  | 0  | 228 |
| 0  | 2  | 2  | 2    | 49  | 0  | 17  |
| 0  | 0  | 0  | 0    | 54  | 0  | 26  |
| 0  | 7  | 0  | 0    | 9   | 0  | 12  |
| 0  | 0  | 0  | 0    | 15  | 0  | 4   |
| 0  | 1  | 0  | 0    | 0   | 0  | 3   |
| 10 | 0  | 31 | 1811 | 176 | 46 | 6   |
| 19 | 94 | 26 | 2    | 58  | 3  | 14  |
| 5  | 11 | 33 | 4    | 182 | 2  | 237 |
| 0  | 10 | 20 | 1    | 14  | 1  | 112 |
| 0  | 8  | 2  | 0    | 34  | 1  | 105 |
| 0  | 0  | 0  | 0    | 22  | 2  | 8   |
| 0  | 0  | 0  | 0    | 27  | 0  | 2   |
| 0  | 0  | 0  | 0    | 0   | 0  | 0   |
| 0  | 0  | 0  | 0    | 0   | 0  | 0   |
| 0  | 0  | 0  | 0    | 0   | 0  | 0   |
| 0  | 0  | 0  | 0    | 0   | 0  | 1   |
| 0  | 0  | 0  | 0    | 0   | 0  | 0   |
| 3  | 36 | 4  | 2    | 372 | 8  | 543 |
| 0  | 0  | 2  | 0    | 0   | 1  | 0   |
| 0  | 0  | 0  | 0    | 0   | 0  | 50  |
| 0  | 0  | 0  | 3    | 0   | 0  | 6   |
| 0  | 0  | 0  | 0    | 0   | 0  | 0   |
| 0  | 0  | 0  | 0    | 0   | 0  | 0   |
| 0  | 7  | 0  | 0    | 0   | 0  | 1   |
| 0  | 0  | 0  | 0    | 0   | 0  | 0   |
| 0  | 2  | 1  | 3    | 6   | 1  | 0   |
| 0  | 0  | 0  | 0    | 0   | 0  | 0   |
| 0  | 0  | 0  | 0    | 0   | 0  | 0   |
| 0  | 0  | 1  | 0    | 0   | 0  | 0   |
| 0  | 0  | 0  | 0    | 0   | 3  | 0   |
| 0  | 0  | 0  | 0    | 0   | 0  | 0   |
| 0  | 0  | 0  | 0    | 0   | 1  | 0   |
| 0  | 0  | 0  | 0    | 0   | 0  | 13  |
| 0  | 0  | 5  | 0    | 0   | 0  | 0   |
| 0  | 0  | 0  | 0    | 0   | 0  | 0   |
| 2  | 0  | 0  | 0    | 0   | 0  | 0   |
| 0  | 0  | 0  | 0    | 0   | 0  | 0   |
| 0  | 0  | 0  | 0    | 0   | 0  | 0   |
| 0  | 0  | 0  | 0    | 0   | 0  | 0   |
| 0  | 0  | 0  | 0    | 0   | 0  | 0   |
| 0  | 0  | 0  | 0    | 0   | 0  | 0   |
| 0  | 0  | 0  | 0    | 0   | 0  | 0   |
| 0  | 0  | 0  | 0    | 0   | 0  | 0   |
| 0  | 0  | 4  | 1    | 13  | 0  | 12  |
| 0  | 2  | 0  | 0    | 3   | 0  | 3   |
| 0  | 0  | 0  | 0    | 5   | 0  | 0   |
| 0  | 0  | 0  | 0    | 0   | 0  | 0   |
| 0  | 0  | 0  | 0    | 0   | 0  | 0   |
| 0  | 0  | 0  | 0    | 0   | 0  | 0   |

|      |      |     |     |     |     |     |
|------|------|-----|-----|-----|-----|-----|
| 0    | 0    | 0   | 0   | 0   | 0   | 0   |
| 0    | 0    | 0   | 0   | 0   | 0   | 0   |
| 316  | 28   | 497 | 247 | 60  | 816 | 3   |
| 0    | 0    | 0   | 0   | 0   | 50  | 0   |
| 0    | 0    | 0   | 0   | 0   | 0   | 0   |
| 0    | 0    | 0   | 0   | 0   | 2   | 0   |
| 0    | 0    | 0   | 0   | 0   | 0   | 0   |
| 0    | 0    | 0   | 0   | 0   | 0   | 0   |
| 0    | 0    | 0   | 0   | 0   | 0   | 0   |
| 0    | 0    | 0   | 4   | 2   | 2   | 0   |
| 0    | 0    | 0   | 0   | 1   | 0   | 16  |
| 0    | 0    | 0   | 0   | 0   | 0   | 0   |
| 0    | 0    | 0   | 0   | 0   | 0   | 0   |
| 0    | 0    | 0   | 0   | 0   | 0   | 0   |
| 0    | 0    | 0   | 0   | 0   | 0   | 0   |
| 0    | 0    | 0   | 0   | 0   | 0   | 0   |
| 0    | 0    | 0   | 0   | 0   | 0   | 0   |
| 0    | 0    | 0   | 0   | 0   | 0   | 0   |
| 0    | 0    | 0   | 0   | 0   | 0   | 0   |
| 0    | 0    | 0   | 0   | 0   | 0   | 0   |
| 0    | 3    | 33  | 0   | 0   | 0   | 0   |
| 0    | 0    | 4   | 0   | 4   | 0   | 0   |
| 0    | 0    | 0   | 0   | 0   | 0   | 0   |
| 0    | 0    | 0   | 0   | 0   | 0   | 0   |
| 0    | 0    | 0   | 0   | 0   | 5   | 0   |
| 5    | 12   | 53  | 0   | 0   | 0   | 0   |
| 9    | 19   | 73  | 0   | 3   | 0   | 12  |
| 0    | 0    | 1   | 0   | 0   | 0   | 1   |
| 0    | 0    | 0   | 0   | 0   | 0   | 0   |
| 4    | 10   | 0   | 0   | 0   | 0   | 0   |
| 0    | 0    | 0   | 0   | 0   | 0   | 0   |
| 0    | 3    | 0   | 1   | 0   | 0   | 0   |
| 0    | 0    | 0   | 0   | 0   | 0   | 0   |
| 1    | 0    | 0   | 0   | 1   | 0   | 0   |
| 0    | 0    | 0   | 0   | 0   | 0   | 0   |
| 0    | 0    | 0   | 0   | 0   | 0   | 0   |
| 0    | 0    | 0   | 15  | 0   | 0   | 0   |
| 0    | 0    | 0   | 0   | 0   | 0   | 0   |
| 0    | 2    | 0   | 1   | 0   | 0   | 0   |
| 0    | 0    | 0   | 0   | 0   | 0   | 0   |
| 0    | 0    | 0   | 0   | 0   | 0   | 0   |
| 0    | 0    | 0   | 0   | 0   | 0   | 0   |
| 528  | 168  | 125 | 141 | 24  | 27  | 14  |
| 0    | 0    | 0   | 1   | 0   | 0   | 0   |
| 0    | 1    | 3   | 0   | 1   | 0   | 0   |
| 1894 | 5486 | 748 | 407 | 685 | 589 | 863 |
| 1    | 23   | 26  | 637 | 55  | 3   | 4   |
| 37   | 12   | 32  | 84  | 43  | 47  | 173 |
| 31   | 33   | 18  | 45  | 108 | 98  | 177 |
| 1    | 61   | 13  | 981 | 9   | 9   | 71  |

|   |   |    |    |    |     |    |
|---|---|----|----|----|-----|----|
| 1 | 0 | 0  | 6  | 12 | 10  | 0  |
| 6 | 1 | 3  | 29 | 11 | 63  | 13 |
| 2 | 1 | 4  | 3  | 0  | 10  | 4  |
| 0 | 0 | 13 | 6  | 2  | 1   | 0  |
| 5 | 6 | 0  | 0  | 0  | 14  | 4  |
| 0 | 0 | 0  | 0  | 0  | 0   | 58 |
| 0 | 0 | 5  | 0  | 0  | 0   | 0  |
| 0 | 6 | 0  | 0  | 31 | 13  | 4  |
| 4 | 8 | 6  | 1  | 1  | 7   | 0  |
| 0 | 1 | 0  | 0  | 0  | 365 | 14 |
| 2 | 1 | 1  | 18 | 8  | 33  | 27 |
| 4 | 0 | 0  | 0  | 0  | 6   | 1  |
| 9 | 0 | 0  | 5  | 0  | 7   | 0  |
| 1 | 5 | 0  | 0  | 0  | 1   | 2  |
| 0 | 0 | 1  | 11 | 5  | 0   | 0  |
| 0 | 3 | 1  | 23 | 1  | 6   | 0  |
| 0 | 9 | 3  | 2  | 1  | 1   | 1  |
| 0 | 0 | 0  | 5  | 52 | 8   | 7  |
| 0 | 0 | 0  | 0  | 0  | 4   | 1  |
| 0 | 7 | 0  | 0  | 0  | 0   | 0  |
| 0 | 2 | 0  | 2  | 0  | 1   | 0  |
| 0 | 0 | 2  | 0  | 3  | 2   | 1  |
| 0 | 0 | 0  | 0  | 0  | 0   | 0  |
| 0 | 0 | 0  | 0  | 0  | 0   | 0  |
| 0 | 0 | 0  | 0  | 0  | 0   | 0  |
| 2 | 1 | 0  | 6  | 2  | 3   | 2  |
| 0 | 0 | 0  | 0  | 0  | 2   | 4  |
| 0 | 0 | 0  | 0  | 0  | 0   | 0  |
| 0 | 0 | 0  | 0  | 0  | 0   | 1  |
| 0 | 0 | 0  | 0  | 0  | 0   | 0  |
| 0 | 0 | 0  | 0  | 0  | 0   | 13 |
| 0 | 0 | 0  | 0  | 0  | 0   | 2  |
| 0 | 0 | 0  | 1  | 0  | 0   | 0  |
| 0 | 1 | 0  | 1  | 0  | 4   | 0  |
| 0 | 0 | 0  | 0  | 0  | 0   | 4  |
| 0 | 0 | 0  | 0  | 0  | 7   | 0  |
| 0 | 0 | 0  | 0  | 7  | 0   | 0  |
| 0 | 0 | 0  | 0  | 0  | 0   | 0  |
| 0 | 0 | 0  | 0  | 0  | 0   | 0  |
| 0 | 0 | 0  | 0  | 0  | 0   | 0  |
| 0 | 0 | 0  | 0  | 0  | 0   | 0  |
| 0 | 0 | 0  | 0  | 0  | 1   | 0  |
| 0 | 0 | 0  | 0  | 0  | 0   | 0  |
| 0 | 0 | 0  | 1  | 0  | 0   | 0  |
| 0 | 0 | 0  | 0  | 0  | 0   | 0  |
| 0 | 0 | 0  | 0  | 0  | 0   | 0  |
| 0 | 0 | 0  | 0  | 1  | 0   | 0  |
| 0 | 0 | 0  | 0  | 0  | 1   | 0  |
| 0 | 0 | 0  | 0  | 0  | 0   | 0  |





|     |     |     |     |     |     |     |
|-----|-----|-----|-----|-----|-----|-----|
| 0   | 0   | 0   | 0   | 0   | 0   | 0   |
| 224 | 603 | 655 | 314 | 114 | 362 | 6   |
| 23  | 9   | 197 | 301 | 46  | 35  | 4   |
| 13  | 3   | 9   | 30  | 18  | 22  | 6   |
| 16  | 2   | 0   | 0   | 1   | 0   | 0   |
| 0   | 0   | 0   | 0   | 0   | 455 | 13  |
| 5   | 3   | 27  | 0   | 0   | 13  | 0   |
| 0   | 0   | 0   | 0   | 0   | 0   | 0   |
| 8   | 0   | 10  | 0   | 0   | 0   | 0   |
| 9   | 3   | 8   | 13  | 0   | 13  | 0   |
| 6   | 30  | 1   | 0   | 14  | 0   | 2   |
| 31  | 25  | 8   | 0   | 0   | 0   | 0   |
| 0   | 0   | 0   | 0   | 0   | 2   | 0   |
| 0   | 0   | 0   | 3   | 0   | 1   | 0   |
| 3   | 1   | 0   | 23  | 0   | 0   | 0   |
| 0   | 0   | 0   | 0   | 1   | 0   | 2   |
| 0   | 0   | 0   | 0   | 0   | 0   | 0   |
| 9   | 5   | 1   | 0   | 0   | 0   | 0   |
| 4   | 0   | 0   | 0   | 0   | 0   | 0   |
| 0   | 0   | 0   | 2   | 0   | 39  | 3   |
| 39  | 12  | 7   | 3   | 4   | 1   | 0   |
| 0   | 0   | 0   | 0   | 1   | 0   | 4   |
| 0   | 0   | 21  | 0   | 2   | 0   | 0   |
| 0   | 0   | 0   | 0   | 0   | 0   | 0   |
| 0   | 0   | 0   | 0   | 0   | 0   | 2   |
| 0   | 0   | 0   | 0   | 0   | 0   | 0   |
| 0   | 0   | 0   | 0   | 0   | 0   | 9   |
| 0   | 0   | 0   | 0   | 0   | 0   | 0   |
| 0   | 0   | 0   | 0   | 0   | 0   | 5   |
| 0   | 0   | 0   | 0   | 0   | 3   | 0   |
| 0   | 0   | 2   | 3   | 0   | 1   | 0   |
| 0   | 0   | 0   | 0   | 0   | 0   | 0   |
| 72  | 87  | 42  | 4   | 4   | 0   | 2   |
| 202 | 132 | 764 | 77  | 16  | 76  | 4   |
| 26  | 4   | 179 | 370 | 104 | 88  | 67  |
| 42  | 131 | 402 | 278 | 418 | 31  | 47  |
| 0   | 0   | 0   | 0   | 2   | 1   | 0   |
| 1   | 0   | 0   | 1   | 0   | 0   | 0   |
| 38  | 33  | 20  | 17  | 102 | 31  | 74  |
| 33  | 73  | 11  | 10  | 112 | 19  | 299 |
| 2   | 1   | 0   | 23  | 24  | 19  | 3   |
| 10  | 2   | 179 | 1   | 2   | 49  | 0   |
| 0   | 0   | 0   | 0   | 0   | 2   | 2   |
| 32  | 55  | 11  | 0   | 54  | 6   | 36  |
| 3   | 1   | 147 | 0   | 0   | 5   | 0   |
| 0   | 0   | 3   | 5   | 12  | 4   | 0   |
| 0   | 23  | 0   | 0   | 0   | 0   | 1   |
| 0   | 1   | 0   | 0   | 0   | 0   | 10  |



|   |   |    |    |   |    |    |
|---|---|----|----|---|----|----|
| 0 | 0 | 0  | 0  | 9 | 0  | 0  |
| 0 | 0 | 0  | 0  | 0 | 0  | 0  |
| 0 | 0 | 0  | 0  | 0 | 0  | 0  |
| 0 | 0 | 0  | 0  | 0 | 0  | 0  |
| 0 | 0 | 0  | 0  | 0 | 0  | 0  |
| 0 | 0 | 0  | 0  | 0 | 0  | 4  |
| 0 | 0 | 0  | 0  | 0 | 0  | 0  |
| 0 | 0 | 0  | 0  | 0 | 0  | 0  |
| 0 | 0 | 0  | 0  | 0 | 0  | 0  |
| 0 | 0 | 0  | 0  | 0 | 0  | 0  |
| 0 | 0 | 0  | 0  | 0 | 10 | 2  |
| 0 | 0 | 0  | 0  | 0 | 0  | 0  |
| 0 | 0 | 0  | 0  | 0 | 0  | 0  |
| 2 | 0 | 1  | 0  | 0 | 0  | 0  |
| 0 | 0 | 0  | 0  | 0 | 0  | 0  |
| 0 | 0 | 0  | 0  | 0 | 0  | 0  |
| 0 | 0 | 0  | 0  | 8 | 0  | 17 |
| 0 | 0 | 0  | 0  | 0 | 0  | 0  |
| 0 | 0 | 0  | 0  | 0 | 0  | 0  |
| 0 | 0 | 0  | 0  | 0 | 0  | 0  |
| 0 | 0 | 0  | 0  | 0 | 0  | 0  |
| 0 | 0 | 0  | 0  | 0 | 0  | 0  |
| 3 | 0 | 1  | 0  | 0 | 0  | 0  |
| 0 | 0 | 0  | 0  | 0 | 0  | 0  |
| 0 | 0 | 0  | 0  | 0 | 0  | 0  |
| 0 | 0 | 0  | 0  | 0 | 0  | 1  |
| 0 | 0 | 0  | 0  | 0 | 0  | 0  |
| 5 | 0 | 39 | 31 | 8 | 4  | 14 |
| 2 | 0 | 7  | 0  | 1 | 0  | 1  |
| 1 | 0 | 0  | 0  | 0 | 0  | 0  |
| 0 | 0 | 2  | 2  | 0 | 0  | 0  |
| 0 | 0 | 3  | 0  | 0 | 0  | 0  |
| 0 | 0 | 2  | 1  | 2 | 0  | 0  |
| 0 | 0 | 0  | 0  | 0 | 0  | 0  |
| 0 | 0 | 0  | 0  | 0 | 0  | 0  |
| 0 | 0 | 0  | 0  | 0 | 0  | 0  |
| 0 | 0 | 0  | 0  | 0 | 0  | 0  |
| 0 | 0 | 1  | 0  | 0 | 0  | 0  |
| 1 | 0 | 0  | 0  | 0 | 1  | 0  |
| 1 | 0 | 33 | 0  | 0 | 38 | 13 |
| 0 | 0 | 0  | 0  | 0 | 0  | 0  |
| 0 | 0 | 0  | 1  | 1 | 1  | 2  |
| 0 | 0 | 0  | 0  | 0 | 0  | 0  |
| 0 | 0 | 0  | 0  | 6 | 0  | 0  |
| 0 | 0 | 0  | 0  | 0 | 0  | 0  |
| 0 | 0 | 0  | 0  | 0 | 0  | 0  |

|      |     |       |      |      |     |      |
|------|-----|-------|------|------|-----|------|
| 767  | 323 | 11702 | 9796 | 2318 | 864 | 1388 |
| 13   | 0   | 216   | 204  | 158  | 73  | 5    |
| 0    | 0   | 0     | 0    | 0    | 0   | 0    |
| 0    | 0   | 0     | 9    | 0    | 0   | 0    |
| 5    | 0   | 60    | 5    | 37   | 1   | 0    |
| 0    | 0   | 10    | 1    | 0    | 0   | 0    |
| 0    | 0   | 0     | 0    | 0    | 0   | 0    |
| 0    | 0   | 0     | 1    | 0    | 0   | 0    |
| 0    | 0   | 3     | 1    | 0    | 0   | 0    |
| 0    | 1   | 0     | 1    | 0    | 0   | 0    |
| 0    | 0   | 0     | 0    | 0    | 0   | 0    |
| 0    | 0   | 0     | 0    | 0    | 0   | 0    |
| 14   | 0   | 128   | 74   | 30   | 5   | 4    |
| 3    | 0   | 68    | 0    | 0    | 2   | 55   |
| 0    | 1   | 0     | 104  | 15   | 273 | 142  |
| 0    | 0   | 0     | 0    | 0    | 0   | 0    |
| 0    | 0   | 0     | 0    | 0    | 0   | 0    |
| 0    | 0   | 0     | 0    | 0    | 0   | 0    |
| 0    | 0   | 0     | 0    | 0    | 0   | 0    |
| 63   | 0   | 41    | 287  | 15   | 305 | 212  |
| 0    | 0   | 0     | 5    | 0    | 0   | 0    |
| 0    | 0   | 0     | 0    | 0    | 0   | 0    |
| 0    | 0   | 0     | 0    | 0    | 1   | 0    |
| 0    | 0   | 0     | 1    | 0    | 0   | 0    |
| 21   | 4   | 423   | 58   | 54   | 30  | 9    |
| 0    | 0   | 0     | 0    | 0    | 0   | 0    |
| 0    | 0   | 0     | 0    | 0    | 0   | 0    |
| 19   | 0   | 6     | 1229 | 74   | 299 | 254  |
| 5104 | 27  | 557   | 17   | 30   | 1   | 3    |
| 341  | 46  | 293   | 770  | 128  | 302 | 27   |
| 110  | 1   | 49    | 191  | 23   | 80  | 7    |
| 0    | 7   | 6     | 13   | 1    | 12  | 2    |
| 110  | 1   | 15    | 1659 | 81   | 817 | 15   |
| 0    | 0   | 0     | 1    | 2    | 23  | 17   |
| 1    | 2   | 52    | 72   | 14   | 32  | 6    |
| 4    | 2   | 2     | 401  | 20   | 110 | 13   |
| 0    | 2   | 0     | 1    | 0    | 5   | 3    |
| 18   | 2   | 40    | 0    | 1    | 0   | 0    |
| 0    | 0   | 0     | 0    | 0    | 0   | 0    |
| 0    | 0   | 0     | 1    | 0    | 30  | 24   |
| 0    | 0   | 0     | 0    | 0    | 0   | 0    |
| 0    | 0   | 0     | 0    | 0    | 0   | 0    |
| 0    | 0   | 0     | 0    | 0    | 0   | 0    |
| 12   | 0   | 12    | 6571 | 476  | 341 | 263  |
| 13   | 1   | 40    | 571  | 67   | 125 | 80   |
| 738  | 4   | 14    | 0    | 0    | 6   | 0    |
| 0    | 0   | 0     | 109  | 0    | 11  | 0    |
| 0    | 0   | 0     | 2    | 0    | 0   | 0    |

|      |     |      |      |     |      |      |
|------|-----|------|------|-----|------|------|
| 0    | 0   | 0    | 0    | 0   | 0    | 0    |
| 0    | 0   | 0    | 4    | 0   | 1    | 0    |
| 0    | 0   | 0    | 14   | 0   | 1    | 0    |
| 0    | 0   | 0    | 14   | 1   | 1    | 2    |
| 0    | 0   | 0    | 1    | 0   | 0    | 0    |
| 0    | 0   | 0    | 0    | 0   | 0    | 0    |
| 0    | 0   | 0    | 0    | 0   | 0    | 0    |
| 253  | 4   | 0    | 105  | 0   | 1    | 0    |
| 1    | 0   | 0    | 0    | 0   | 1    | 0    |
| 1    | 2   | 19   | 0    | 233 | 21   | 62   |
| 7    | 40  | 0    | 0    | 1   | 1    | 39   |
| 7    | 0   | 6    | 4    | 0   | 1    | 32   |
| 0    | 0   | 0    | 0    | 0   | 0    | 0    |
| 0    | 0   | 0    | 0    | 0   | 0    | 0    |
| 0    | 0   | 0    | 0    | 0   | 0    | 0    |
| 4134 | 64  | 2036 | 5259 | 678 | 1238 | 782  |
| 471  | 4   | 1227 | 130  | 24  | 61   | 79   |
| 0    | 1   | 0    | 0    | 0   | 0    | 0    |
| 0    | 0   | 1    | 2    | 2   | 10   | 0    |
| 0    | 0   | 0    | 0    | 0   | 0    | 0    |
| 37   | 0   | 20   | 4    | 0   | 0    | 2    |
| 1    | 0   | 2    | 0    | 0   | 0    | 0    |
| 0    | 0   | 0    | 0    | 0   | 0    | 0    |
| 0    | 0   | 0    | 0    | 0   | 0    | 0    |
| 84   | 0   | 56   | 29   | 9   | 6    | 7    |
| 0    | 0   | 0    | 0    | 0   | 0    | 0    |
| 12   | 0   | 7    | 5    | 1   | 1    | 1    |
| 0    | 0   | 0    | 0    | 0   | 0    | 0    |
| 1    | 0   | 0    | 0    | 1   | 27   | 2    |
| 9    | 1   | 2    | 1    | 0   | 93   | 4    |
| 20   | 0   | 96   | 321  | 88  | 102  | 36   |
| 2    | 1   | 0    | 368  | 17  | 194  | 35   |
| 58   | 17  | 115  | 27   | 14  | 119  | 3    |
| 0    | 0   | 0    | 0    | 0   | 0    | 0    |
| 0    | 0   | 0    | 0    | 0   | 0    | 0    |
| 0    | 0   | 0    | 0    | 0   | 0    | 0    |
| 0    | 0   | 0    | 0    | 0   | 0    | 0    |
| 0    | 0   | 2    | 0    | 0   | 0    | 0    |
| 1048 | 489 | 1897 | 351  | 692 | 251  | 1127 |
| 16   | 247 | 16   | 0    | 86  | 9    | 345  |
| 131  | 64  | 405  | 1088 | 825 | 13   | 294  |
| 0    | 0   | 5    | 2    | 236 | 2    | 453  |
| 6    | 0   | 3    | 0    | 37  | 6    | 20   |
| 0    | 0   | 0    | 0    | 61  | 0    | 1    |
| 0    | 0   | 0    | 0    | 0   | 0    | 0    |
| 0    | 0   | 0    | 0    | 8   | 1    | 4    |
| 0    | 0   | 0    | 0    | 2   | 0    | 11   |
| 0    | 0   | 0    | 0    | 2   | 0    | 0    |

|     |    |      |     |     |     |     |
|-----|----|------|-----|-----|-----|-----|
| 0   | 0  | 1    | 0   | 0   | 0   | 0   |
| 1   | 0  | 0    | 0   | 0   | 0   | 0   |
| 0   | 0  | 0    | 0   | 0   | 0   | 0   |
| 0   | 0  | 0    | 0   | 0   | 0   | 0   |
| 0   | 0  | 0    | 0   | 1   | 0   | 0   |
| 0   | 0  | 0    | 0   | 0   | 0   | 0   |
| 0   | 0  | 0    | 0   | 1   | 0   | 2   |
| 0   | 0  | 0    | 0   | 0   | 0   | 2   |
| 0   | 0  | 0    | 0   | 0   | 0   | 0   |
| 0   | 0  | 0    | 0   | 0   | 0   | 0   |
| 0   | 0  | 0    | 0   | 0   | 0   | 1   |
| 0   | 0  | 0    | 0   | 0   | 0   | 0   |
| 0   | 0  | 5    | 0   | 0   | 47  | 0   |
| 0   | 0  | 0    | 0   | 0   | 0   | 0   |
| 41  | 22 | 7    | 154 | 21  | 30  | 4   |
| 102 | 0  | 2    | 146 | 25  | 38  | 5   |
| 25  | 73 | 41   | 0   | 17  | 28  | 16  |
| 0   | 0  | 0    | 0   | 0   | 4   | 1   |
| 0   | 0  | 1    | 62  | 3   | 52  | 33  |
| 0   | 0  | 0    | 0   | 1   | 0   | 0   |
| 0   | 0  | 1    | 0   | 0   | 1   | 0   |
| 0   | 0  | 0    | 0   | 0   | 5   | 6   |
| 0   | 0  | 0    | 0   | 0   | 0   | 0   |
| 0   | 0  | 0    | 0   | 0   | 0   | 0   |
| 0   | 0  | 0    | 0   | 0   | 0   | 0   |
| 282 | 0  | 3981 | 304 | 62  | 114 | 29  |
| 19  | 0  | 366  | 0   | 2   | 239 | 155 |
| 1   | 0  | 15   | 3   | 2   | 1   | 0   |
| 0   | 0  | 0    | 0   | 0   | 0   | 0   |
| 0   | 0  | 9    | 1   | 5   | 0   | 0   |
| 1   | 4  | 10   | 4   | 199 | 22  | 747 |
| 0   | 0  | 0    | 0   | 4   | 0   | 10  |
| 0   | 0  | 0    | 0   | 0   | 0   | 0   |
| 0   | 0  | 0    | 0   | 5   | 0   | 1   |
| 0   | 0  | 0    | 0   | 0   | 0   | 0   |
| 0   | 0  | 0    | 0   | 0   | 0   | 0   |
| 0   | 0  | 0    | 0   | 0   | 0   | 0   |
| 0   | 0  | 0    | 0   | 0   | 0   | 1   |
| 0   | 0  | 0    | 0   | 0   | 0   | 0   |
| 0   | 0  | 0    | 0   | 0   | 0   | 1   |
| 0   | 0  | 0    | 0   | 0   | 0   | 0   |
| 13  | 16 | 1    | 0   | 0   | 1   | 0   |
| 0   | 2  | 0    | 0   | 0   | 17  | 1   |
| 5   | 0  | 0    | 0   | 0   | 9   | 0   |
| 0   | 0  | 5    | 0   | 2   | 0   | 1   |
| 0   | 2  | 0    | 0   | 0   | 14  | 0   |
| 0   | 0  | 0    | 0   | 0   | 0   | 1   |

|     |     |      |      |      |     |     |
|-----|-----|------|------|------|-----|-----|
| 0   | 0   | 0    | 0    | 0    | 0   | 0   |
| 0   | 0   | 0    | 0    | 0    | 0   | 0   |
| 283 | 938 | 2898 | 5474 | 1635 | 526 | 367 |
| 506 | 5   | 863  | 46   | 0    | 58  | 0   |
| 200 | 913 | 1155 | 765  | 715  | 256 | 152 |
| 14  | 47  | 110  | 7    | 124  | 1   | 193 |
| 196 | 104 | 78   | 153  | 237  | 190 | 14  |
| 46  | 824 | 496  | 4    | 428  | 12  | 508 |
| 62  | 163 | 78   | 0    | 18   | 13  | 93  |
| 101 | 9   | 17   | 16   | 0    | 50  | 0   |
| 0   | 8   | 0    | 1    | 0    | 5   | 1   |
| 0   | 32  | 12   | 0    | 13   | 1   | 115 |
| 70  | 79  | 18   | 102  | 391  | 32  | 13  |
| 1   | 0   | 0    | 320  | 20   | 55  | 63  |
| 135 | 604 | 339  | 43   | 282  | 148 | 56  |
| 10  | 44  | 48   | 6    | 28   | 1   | 9   |
| 5   | 10  | 3    | 0    | 13   | 1   | 39  |
| 171 | 895 | 217  | 0    | 61   | 0   | 0   |
| 1   | 9   | 379  | 605  | 197  | 372 | 28  |
| 6   | 149 | 26   | 0    | 6    | 0   | 2   |
| 0   | 0   | 1    | 0    | 0    | 1   | 15  |
| 1   | 7   | 0    | 4    | 0    | 0   | 0   |
| 0   | 42  | 230  | 9    | 216  | 17  | 41  |
| 4   | 20  | 32   | 45   | 121  | 4   | 69  |
| 4   | 15  | 13   | 72   | 0    | 61  | 3   |
| 19  | 38  | 38   | 57   | 133  | 138 | 67  |
| 0   | 2   | 9    | 43   | 67   | 26  | 129 |
| 0   | 0   | 0    | 0    | 0    | 0   | 0   |
| 2   | 3   | 1    | 0    | 36   | 2   | 68  |
| 0   | 43  | 0    | 0    | 24   | 0   | 0   |
| 0   | 2   | 43   | 0    | 7    | 0   | 0   |
| 2   | 0   | 0    | 0    | 54   | 0   | 26  |
| 0   | 9   | 5    | 0    | 0    | 0   | 0   |
| 1   | 77  | 213  | 0    | 21   | 0   | 19  |
| 0   | 13  | 2    | 0    | 15   | 0   | 1   |
| 0   | 2   | 1    | 0    | 31   | 0   | 29  |
| 0   | 3   | 1    | 0    | 0    | 0   | 10  |
| 1   | 0   | 6    | 2    | 0    | 3   | 0   |
| 0   | 0   | 0    | 0    | 4    | 0   | 0   |
| 0   | 0   | 0    | 0    | 7    | 0   | 4   |
| 3   | 0   | 0    | 0    | 0    | 0   | 0   |
| 0   | 0   | 0    | 0    | 0    | 0   | 2   |
| 16  | 8   | 0    | 12   | 1    | 0   | 3   |
| 0   | 0   | 0    | 0    | 19   | 0   | 0   |
| 0   | 1   | 0    | 0    | 1    | 0   | 11  |
| 0   | 0   | 0    | 0    | 0    | 0   | 0   |
| 0   | 0   | 0    | 0    | 0    | 0   | 0   |
| 0   | 0   | 0    | 0    | 0    | 0   | 17  |

|     |     |     |      |     |     |    |
|-----|-----|-----|------|-----|-----|----|
| 0   | 0   | 0   | 0    | 0   | 0   | 0  |
| 0   | 0   | 0   | 0    | 3   | 0   | 3  |
| 1   | 0   | 1   | 17   | 9   | 18  | 0  |
| 0   | 0   | 0   | 0    | 0   | 0   | 0  |
| 0   | 0   | 0   | 0    | 0   | 0   | 28 |
| 0   | 0   | 0   | 0    | 0   | 0   | 3  |
| 0   | 6   | 0   | 0    | 0   | 0   | 31 |
| 0   | 0   | 0   | 0    | 0   | 0   | 0  |
| 0   | 1   | 42  | 20   | 21  | 0   | 0  |
| 0   | 0   | 0   | 0    | 0   | 3   | 0  |
| 0   | 0   | 0   | 0    | 4   | 0   | 0  |
| 0   | 0   | 0   | 0    | 0   | 0   | 0  |
| 0   | 1   | 0   | 0    | 0   | 0   | 0  |
| 0   | 0   | 0   | 0    | 0   | 0   | 0  |
| 0   | 0   | 0   | 0    | 0   | 0   | 0  |
| 0   | 0   | 0   | 0    | 0   | 0   | 0  |
| 0   | 0   | 0   | 0    | 6   | 0   | 1  |
| 0   | 0   | 0   | 0    | 0   | 0   | 0  |
| 1   | 2   | 0   | 0    | 0   | 0   | 3  |
| 0   | 0   | 0   | 0    | 0   | 0   | 0  |
| 1   | 0   | 0   | 0    | 0   | 0   | 0  |
| 0   | 0   | 0   | 0    | 0   | 0   | 2  |
| 0   | 0   | 0   | 0    | 0   | 0   | 0  |
| 0   | 0   | 0   | 0    | 0   | 0   | 0  |
| 0   | 1   | 0   | 0    | 0   | 0   | 0  |
| 0   | 0   | 0   | 0    | 0   | 0   | 1  |
| 0   | 0   | 0   | 0    | 1   | 0   | 0  |
| 0   | 1   | 2   | 3    | 1   | 0   | 4  |
| 0   | 0   | 0   | 0    | 0   | 0   | 0  |
| 0   | 0   | 0   | 0    | 0   | 0   | 1  |
| 0   | 0   | 0   | 0    | 0   | 0   | 0  |
| 0   | 0   | 0   | 0    | 0   | 0   | 0  |
| 0   | 0   | 0   | 0    | 0   | 0   | 0  |
| 0   | 0   | 6   | 2    | 1   | 0   | 0  |
| 0   | 0   | 0   | 1    | 0   | 0   | 0  |
| 0   | 0   | 0   | 0    | 0   | 0   | 0  |
| 0   | 0   | 3   | 0    | 0   | 0   | 0  |
| 0   | 0   | 0   | 0    | 0   | 0   | 0  |
| 0   | 0   | 0   | 1    | 0   | 0   | 0  |
| 0   | 0   | 4   | 1    | 1   | 0   | 0  |
| 0   | 0   | 0   | 0    | 0   | 0   | 0  |
| 0   | 1   | 0   | 0    | 2   | 0   | 0  |
| 0   | 0   | 0   | 0    | 0   | 0   | 0  |
| 841 | 72  | 22  | 1489 | 385 | 153 | 34 |
| 205 | 176 | 117 | 42   | 13  | 13  | 5  |
| 0   | 0   | 0   | 0    | 21  | 0   | 0  |
| 0   | 0   | 0   | 24   | 0   | 1   | 0  |

|       |      |      |      |      |      |      |
|-------|------|------|------|------|------|------|
| 0     | 0    | 0    | 0    | 0    | 0    | 0    |
| 0     | 0    | 0    | 0    | 0    | 0    | 0    |
| 0     | 0    | 0    | 0    | 0    | 0    | 0    |
| 12    | 6    | 14   | 8    | 10   | 6    | 4    |
| 0     | 0    | 0    | 15   | 0    | 2    | 0    |
| 0     | 0    | 0    | 0    | 0    | 0    | 0    |
| 0     | 0    | 0    | 32   | 0    | 0    | 0    |
| 0     | 0    | 0    | 0    | 0    | 0    | 0    |
| 5752  | 254  | 706  | 705  | 371  | 167  | 19   |
| 10285 | 1789 | 9455 | 4897 | 1867 | 1442 | 2081 |
| 103   | 33   | 70   | 0    | 10   | 0    | 0    |
| 547   | 1    | 88   | 8    | 0    | 448  | 3    |
| 2507  | 402  | 1459 | 1823 | 158  | 507  | 56   |
| 298   | 9    | 73   | 8    | 6    | 10   | 4    |
| 1     | 0    | 299  | 0    | 5    | 1    | 13   |
| 27    | 4    | 49   | 12   | 10   | 4    | 15   |
| 7     | 0    | 46   | 27   | 14   | 7    | 0    |
| 150   | 17   | 116  | 32   | 4    | 25   | 0    |
| 0     | 0    | 0    | 0    | 0    | 1    | 0    |
| 57    | 3    | 195  | 2    | 11   | 2    | 34   |
| 22    | 2    | 52   | 62   | 25   | 22   | 5    |
| 59    | 31   | 26   | 0    | 2    | 2    | 11   |
| 0     | 0    | 22   | 8    | 3    | 2    | 0    |
| 1     | 0    | 0    | 4    | 0    | 3    | 0    |
| 0     | 2    | 12   | 6    | 0    | 4    | 0    |
| 18    | 28   | 8    | 1    | 9    | 4    | 10   |
| 11    | 5    | 4    | 3    | 5    | 2    | 2    |
| 25    | 6    | 40   | 22   | 12   | 3    | 2    |
| 7     | 2    | 5    | 1    | 1    | 0    | 3    |
| 0     | 0    | 0    | 0    | 0    | 0    | 0    |
| 9     | 0    | 7    | 5    | 0    | 0    | 0    |
| 60    | 3    | 0    | 3    | 0    | 3    | 0    |
| 0     | 2    | 8    | 5    | 4    | 1    | 6    |
| 8     | 0    | 6    | 6    | 1    | 0    | 13   |
| 0     | 0    | 0    | 0    | 0    | 0    | 0    |
| 0     | 0    | 0    | 0    | 0    | 0    | 0    |
| 3     | 1    | 1    | 2    | 3    | 0    | 6    |
| 2     | 13   | 2    | 0    | 0    | 0    | 3    |
| 0     | 0    | 0    | 0    | 0    | 0    | 0    |
| 0     | 0    | 1    | 0    | 0    | 0    | 2    |
| 0     | 0    | 0    | 0    | 0    | 0    | 4    |
| 0     | 0    | 0    | 0    | 0    | 0    | 0    |
| 0     | 0    | 0    | 0    | 0    | 0    | 0    |
| 0     | 0    | 0    | 0    | 0    | 0    | 0    |
| 1     | 0    | 2    | 0    | 0    | 0    | 1    |
| 0     | 0    | 0    | 0    | 0    | 0    | 0    |
| 1     | 0    | 0    | 2    | 0    | 0    | 0    |
| 0     | 0    | 0    | 0    | 0    | 0    | 0    |





|      |     |     |      |     |      |     |
|------|-----|-----|------|-----|------|-----|
| 0    | 0   | 0   | 0    | 0   | 7    | 3   |
| 1665 | 279 | 625 | 749  | 57  | 382  | 38  |
| 121  | 122 | 195 | 139  | 168 | 79   | 614 |
| 249  | 34  | 87  | 54   | 12  | 30   | 1   |
| 0    | 0   | 1   | 79   | 2   | 49   | 2   |
| 56   | 9   | 99  | 20   | 1   | 14   | 0   |
| 73   | 0   | 53  | 14   | 1   | 57   | 3   |
| 4    | 2   | 64  | 3    | 4   | 5    | 0   |
| 11   | 1   | 4   | 2    | 0   | 10   | 2   |
| 104  | 53  | 135 | 36   | 35  | 47   | 84  |
| 21   | 9   | 12  | 0    | 2   | 3    | 1   |
| 7    | 8   | 5   | 1    | 11  | 4    | 4   |
| 0    | 0   | 2   | 3    | 1   | 2    | 0   |
| 0    | 0   | 0   | 0    | 0   | 2    | 0   |
| 2    | 0   | 0   | 0    | 0   | 0    | 3   |
| 0    | 0   | 1   | 0    | 0   | 0    | 0   |
| 51   | 5   | 25  | 20   | 3   | 15   | 4   |
| 3    | 0   | 4   | 1    | 0   | 2    | 3   |
| 4    | 0   | 5   | 0    | 0   | 2    | 1   |
| 3    | 2   | 0   | 1    | 0   | 0    | 0   |
| 1    | 1   | 1   | 10   | 1   | 0    | 21  |
| 2    | 3   | 1   | 1    | 1   | 2    | 0   |
| 19   | 0   | 10  | 0    | 0   | 1    | 1   |
| 0    | 0   | 0   | 0    | 0   | 0    | 3   |
| 0    | 0   | 0   | 0    | 0   | 0    | 0   |
| 3    | 0   | 0   | 6    | 0   | 1    | 0   |
| 0    | 0   | 0   | 0    | 0   | 0    | 1   |
| 1    | 0   | 0   | 2    | 1   | 0    | 2   |
| 0    | 2   | 0   | 0    | 0   | 0    | 0   |
| 4    | 0   | 0   | 0    | 0   | 0    | 0   |
| 0    | 0   | 0   | 0    | 0   | 0    | 0   |
| 0    | 0   | 0   | 0    | 0   | 0    | 0   |
| 0    | 0   | 0   | 0    | 0   | 0    | 0   |
| 0    | 0   | 0   | 0    | 0   | 0    | 0   |
| 1    | 0   | 0   | 0    | 0   | 0    | 0   |
| 0    | 0   | 0   | 0    | 0   | 0    | 0   |
| 614  | 100 | 526 | 1692 | 17  | 1842 | 27  |
| 619  | 64  | 11  | 1    | 8   | 33   | 9   |
| 0    | 0   | 0   | 0    | 0   | 1    | 0   |
| 0    | 0   | 0   | 0    | 0   | 0    | 0   |
| 2    | 2   | 8   | 4    | 0   | 0    | 0   |
| 0    | 0   | 0   | 0    | 0   | 0    | 2   |
| 0    | 0   | 0   | 0    | 0   | 0    | 0   |
| 1    | 5   | 4   | 1    | 0   | 0    | 3   |
| 0    | 0   | 0   | 0    | 0   | 0    | 0   |
| 0    | 0   | 0   | 0    | 0   | 1    | 0   |
| 1    | 0   | 1   | 0    | 0   | 1    | 0   |
| 3    | 0   | 0   | 0    | 0   | 0    | 0   |

|     |    |     |      |     |     |    |
|-----|----|-----|------|-----|-----|----|
| 2   | 0  | 0   | 1    | 0   | 1   | 0  |
| 0   | 0  | 0   | 0    | 0   | 0   | 13 |
| 4   | 0  | 24  | 1    | 0   | 0   | 0  |
| 0   | 0  | 0   | 0    | 0   | 0   | 0  |
| 0   | 0  | 0   | 0    | 0   | 0   | 0  |
| 1   | 0  | 0   | 0    | 0   | 0   | 0  |
| 0   | 0  | 0   | 0    | 0   | 0   | 0  |
| 0   | 0  | 0   | 0    | 0   | 0   | 0  |
| 0   | 0  | 0   | 0    | 0   | 0   | 0  |
| 0   | 0  | 0   | 0    | 0   | 0   | 0  |
| 0   | 0  | 0   | 1    | 0   | 0   | 0  |
| 0   | 0  | 0   | 0    | 0   | 0   | 0  |
| 0   | 0  | 0   | 1    | 0   | 0   | 0  |
| 1   | 0  | 6   | 0    | 0   | 0   | 0  |
| 0   | 0  | 0   | 0    | 0   | 0   | 0  |
| 0   | 0  | 0   | 0    | 0   | 0   | 0  |
| 0   | 0  | 0   | 0    | 0   | 0   | 0  |
| 0   | 0  | 0   | 0    | 0   | 0   | 0  |
| 0   | 0  | 0   | 0    | 0   | 0   | 0  |
| 0   | 0  | 0   | 12   | 13  | 2   | 15 |
| 0   | 0  | 0   | 0    | 0   | 0   | 0  |
| 0   | 0  | 0   | 0    | 0   | 0   | 12 |
| 0   | 0  | 0   | 0    | 8   | 0   | 15 |
| 0   | 0  | 0   | 0    | 0   | 2   | 23 |
| 0   | 0  | 0   | 5    | 0   | 0   | 0  |
| 0   | 0  | 0   | 0    | 0   | 0   | 11 |
| 0   | 0  | 0   | 0    | 0   | 0   | 0  |
| 0   | 0  | 0   | 0    | 0   | 0   | 0  |
| 0   | 0  | 0   | 0    | 0   | 0   | 0  |
| 0   | 0  | 0   | 0    | 0   | 0   | 0  |
| 0   | 0  | 0   | 0    | 0   | 0   | 0  |
| 0   | 0  | 0   | 0    | 0   | 0   | 0  |
| 0   | 0  | 0   | 0    | 0   | 0   | 0  |
| 0   | 0  | 0   | 0    | 0   | 0   | 0  |
| 0   | 0  | 0   | 0    | 0   | 0   | 0  |
| 0   | 3  | 2   | 21   | 0   | 1   | 0  |
| 0   | 0  | 0   | 0    | 0   | 0   | 0  |
| 0   | 0  | 0   | 0    | 0   | 0   | 0  |
| 0   | 0  | 0   | 3    | 1   | 0   | 0  |
| 427 | 47 | 366 | 1285 | 109 | 378 | 20 |
| 0   | 0  | 0   | 2    | 1   | 1   | 0  |
| 129 | 7  | 418 | 3    | 0   | 3   | 2  |
| 1   | 1  | 0   | 3    | 8   | 1   | 0  |
| 0   | 0  | 0   | 0    | 0   | 0   | 0  |
| 0   | 0  | 0   | 13   | 2   | 0   | 1  |
| 0   | 0  | 0   | 0    | 0   | 0   | 0  |
| 0   | 0  | 0   | 0    | 0   | 0   | 0  |
| 0   | 0  | 0   | 0    | 0   | 0   | 0  |
| 634 | 6  | 656 | 84   | 4   | 9   | 1  |
| 2   | 0  | 7   | 0    | 0   | 0   | 3  |
| 26  | 0  | 26  | 126  | 18  | 49  | 11 |
| 0   | 0  | 0   | 0    | 0   | 0   | 2  |
| 0   | 0  | 0   | 0    | 0   | 0   | 0  |
| 52  | 22 | 92  | 11   | 13  | 26  | 1  |

|     |     |     |      |     |     |    |
|-----|-----|-----|------|-----|-----|----|
| 0   | 0   | 0   | 0    | 0   | 0   | 0  |
| 25  | 9   | 92  | 304  | 26  | 227 | 8  |
| 239 | 22  | 156 | 134  | 44  | 38  | 3  |
| 58  | 6   | 0   | 0    | 0   | 0   | 0  |
| 0   | 0   | 0   | 0    | 0   | 0   | 0  |
| 2   | 17  | 0   | 0    | 0   | 13  | 0  |
| 0   | 0   | 0   | 0    | 0   | 0   | 0  |
| 0   | 0   | 0   | 0    | 0   | 0   | 0  |
| 0   | 0   | 0   | 0    | 0   | 0   | 0  |
| 106 | 51  | 199 | 240  | 117 | 80  | 67 |
| 26  | 4   | 84  | 1083 | 31  | 126 | 4  |
| 5   | 0   | 9   | 0    | 22  | 26  | 15 |
| 0   | 0   | 0   | 0    | 2   | 0   | 3  |
| 0   | 0   | 0   | 0    | 0   | 0   | 4  |
| 0   | 0   | 0   | 0    | 0   | 0   | 0  |
| 0   | 0   | 0   | 0    | 4   | 0   | 0  |
| 0   | 0   | 0   | 0    | 6   | 0   | 5  |
| 0   | 0   | 0   | 0    | 0   | 0   | 4  |
| 0   | 0   | 0   | 0    | 14  | 0   | 2  |
| 0   | 0   | 0   | 0    | 12  | 0   | 2  |
| 0   | 0   | 0   | 0    | 1   | 0   | 9  |
| 0   | 0   | 0   | 0    | 0   | 0   | 0  |
| 0   | 0   | 0   | 0    | 0   | 0   | 0  |
| 0   | 0   | 0   | 0    | 0   | 0   | 0  |
| 0   | 0   | 0   | 0    | 0   | 0   | 0  |
| 0   | 0   | 0   | 0    | 0   | 0   | 0  |
| 0   | 0   | 0   | 0    | 0   | 0   | 0  |
| 0   | 0   | 0   | 0    | 0   | 0   | 0  |
| 0   | 0   | 0   | 0    | 0   | 0   | 0  |
| 0   | 0   | 0   | 0    | 0   | 0   | 0  |
| 0   | 0   | 0   | 0    | 0   | 0   | 0  |
| 0   | 9   | 2   | 0    | 0   | 1   | 0  |
| 0   | 0   | 0   | 0    | 0   | 0   | 0  |
| 0   | 0   | 0   | 0    | 0   | 0   | 0  |
| 0   | 157 | 3   | 0    | 0   | 2   | 0  |
| 0   | 0   | 0   | 105  | 2   | 48  | 0  |
| 0   | 0   | 0   | 0    | 0   | 0   | 0  |
| 0   | 0   | 9   | 1    | 0   | 10  | 2  |
| 0   | 0   | 0   | 0    | 0   | 0   | 0  |
| 0   | 0   | 0   | 0    | 0   | 0   | 0  |
| 4   | 16  | 37  | 0    | 11  | 0   | 45 |
| 12  | 19  | 8   | 0    | 6   | 0   | 15 |
| 0   | 0   | 0   | 0    | 0   | 0   | 0  |
| 0   | 0   | 0   | 0    | 0   | 0   | 4  |
| 0   | 0   | 0   | 1    | 0   | 0   | 0  |
| 0   | 0   | 11  | 0    | 0   | 0   | 0  |
| 1   | 1   | 0   | 0    | 0   | 0   | 0  |
| 0   | 0   | 0   | 0    | 0   | 0   | 0  |

|    |     |    |     |      |    |      |
|----|-----|----|-----|------|----|------|
| 0  | 3   | 0  | 0   | 14   | 1  | 17   |
| 0  | 0   | 0  | 0   | 0    | 0  | 0    |
| 0  | 0   | 0  | 0   | 0    | 0  | 0    |
| 0  | 1   | 1  | 25  | 0    | 43 | 0    |
| 0  | 0   | 2  | 0   | 0    | 0  | 0    |
| 0  | 0   | 0  | 0   | 0    | 0  | 0    |
| 9  | 4   | 37 | 102 | 86   | 32 | 2    |
| 4  | 2   | 0  | 0   | 0    | 0  | 0    |
| 0  | 0   | 0  | 2   | 6    | 0  | 2    |
| 0  | 0   | 0  | 0   | 0    | 0  | 0    |
| 0  | 0   | 0  | 1   | 0    | 0  | 2    |
| 0  | 0   | 0  | 0   | 0    | 0  | 0    |
| 0  | 0   | 0  | 0   | 3    | 0  | 2    |
| 0  | 0   | 0  | 0   | 0    | 0  | 0    |
| 53 | 482 | 14 | 15  | 1570 | 5  | 1081 |
| 0  | 0   | 0  | 0   | 1    | 0  | 6    |
| 0  | 0   | 0  | 0   | 1    | 0  | 4    |
| 0  | 0   | 0  | 0   | 0    | 0  | 0    |
| 0  | 0   | 0  | 0   | 0    | 0  | 0    |
| 0  | 0   | 0  | 0   | 0    | 0  | 0    |
| 0  | 0   | 0  | 4   | 0    | 0  | 0    |
| 0  | 0   | 0  | 0   | 0    | 0  | 0    |
| 0  | 0   | 0  | 0   | 13   | 0  | 7    |
| 0  | 1   | 0  | 0   | 0    | 0  | 0    |
| 0  | 0   | 0  | 0   | 0    | 0  | 0    |
| 0  | 6   | 0  | 0   | 1    | 0  | 3    |
| 0  | 0   | 0  | 0   | 0    | 0  | 0    |

| 78.SUR | 78.DCM | 82.SUR | 82.DCM | 84.SUR | 85.SUR | 85.DCM |   |
|--------|--------|--------|--------|--------|--------|--------|---|
| 0      | 0      | 0      | 4      | 0      | 0      | 0      | 0 |
| 0      | 0      | 0      | 0      | 0      | 0      | 0      | 0 |
| 0      | 1      | 0      | 0      | 0      | 0      | 0      | 0 |
| 0      | 1      | 0      | 0      | 0      | 0      | 0      | 0 |
| 0      | 0      | 0      | 0      | 0      | 0      | 0      | 0 |
| 0      | 6      | 0      | 0      | 0      | 0      | 0      | 0 |
| 0      | 0      | 0      | 0      | 0      | 0      | 0      | 0 |
| 0      | 1      | 0      | 0      | 0      | 0      | 0      | 0 |
| 0      | 24     | 0      | 0      | 0      | 0      | 0      | 0 |
| 37     | 9      | 0      | 0      | 0      | 0      | 0      | 0 |
| 0      | 0      | 0      | 0      | 0      | 0      | 0      | 0 |
| 0      | 0      | 0      | 0      | 0      | 0      | 0      | 0 |
| 0      | 0      | 0      | 0      | 0      | 0      | 0      | 0 |
| 0      | 0      | 0      | 0      | 0      | 0      | 0      | 0 |
| 0      | 0      | 0      | 0      | 0      | 0      | 0      | 0 |
| 0      | 0      | 0      | 0      | 0      | 0      | 0      | 0 |
| 0      | 52     | 0      | 16     | 0      | 0      | 0      | 8 |
| 148    | 48     | 0      | 0      | 1      | 3      | 23     |   |
| 22     | 4      | 0      | 13     | 0      | 0      | 3      |   |
| 0      | 26     | 0      | 0      | 0      | 0      | 0      | 0 |
| 0      | 2      | 0      | 0      | 0      | 0      | 0      | 0 |
| 0      | 0      | 0      | 0      | 0      | 0      | 0      | 0 |
| 0      | 0      | 0      | 0      | 0      | 0      | 0      | 0 |
| 0      | 0      | 0      | 0      | 0      | 0      | 0      | 0 |
| 0      | 0      | 0      | 0      | 0      | 0      | 0      | 0 |
| 0      | 0      | 0      | 0      | 0      | 0      | 0      | 0 |
| 0      | 0      | 0      | 0      | 0      | 0      | 0      | 0 |
| 0      | 0      | 0      | 0      | 0      | 0      | 0      | 0 |
| 0      | 0      | 0      | 0      | 0      | 0      | 0      | 0 |
| 0      | 0      | 0      | 0      | 0      | 0      | 0      | 0 |
| 0      | 1      | 0      | 0      | 0      | 0      | 0      | 0 |
| 0      | 0      | 0      | 0      | 0      | 0      | 0      | 0 |
| 0      | 8      | 0      | 0      | 0      | 0      | 0      | 0 |
| 0      | 0      | 0      | 0      | 0      | 0      | 0      | 0 |
| 0      | 0      | 0      | 0      | 0      | 0      | 0      | 0 |
| 0      | 0      | 23     | 9      | 0      | 0      | 0      | 0 |
| 2      | 0      | 2      | 79     | 0      | 1      | 19     |   |
| 32     | 55     | 0      | 4      | 0      | 11     | 1      |   |
| 370    | 98     | 0      | 5      | 5      | 11     | 2      |   |
| 0      | 0      | 0      | 0      | 0      | 0      | 0      | 0 |
| 0      | 16     | 0      | 0      | 0      | 0      | 0      | 0 |
| 0      | 0      | 0      | 0      | 0      | 0      | 0      | 0 |
| 0      | 0      | 0      | 0      | 0      | 0      | 0      | 0 |
| 0      | 130    | 0      | 64     | 0      | 0      | 4      |   |
| 11     | 18     | 0      | 0      | 0      | 0      | 0      | 0 |
| 0      | 31     | 0      | 0      | 0      | 0      | 0      | 0 |
| 4      | 35     | 0      | 32     | 0      | 0      | 55     |   |

|     |      |    |     |   |   |    |
|-----|------|----|-----|---|---|----|
| 0   | 57   | 0  | 0   | 0 | 0 | 0  |
| 0   | 34   | 0  | 0   | 0 | 0 | 0  |
| 0   | 4    | 0  | 0   | 0 | 0 | 0  |
| 0   | 22   | 0  | 0   | 0 | 0 | 0  |
| 0   | 6    | 0  | 0   | 0 | 0 | 0  |
| 1   | 0    | 0  | 0   | 0 | 0 | 0  |
| 0   | 9    | 0  | 0   | 0 | 0 | 0  |
| 0   | 0    | 0  | 0   | 0 | 0 | 0  |
| 0   | 0    | 0  | 0   | 0 | 0 | 0  |
| 0   | 0    | 0  | 0   | 0 | 0 | 0  |
| 0   | 0    | 0  | 0   | 0 | 0 | 0  |
| 0   | 0    | 0  | 0   | 0 | 0 | 0  |
| 0   | 3    | 0  | 0   | 0 | 0 | 0  |
| 4   | 0    | 0  | 0   | 0 | 0 | 0  |
| 0   | 0    | 0  | 0   | 0 | 0 | 0  |
| 0   | 0    | 0  | 0   | 0 | 0 | 0  |
| 0   | 0    | 0  | 18  | 0 | 0 | 0  |
| 0   | 0    | 0  | 0   | 0 | 0 | 0  |
| 0   | 0    | 0  | 0   | 0 | 0 | 0  |
| 0   | 0    | 0  | 0   | 0 | 0 | 0  |
| 0   | 2    | 0  | 0   | 0 | 0 | 0  |
| 0   | 0    | 0  | 0   | 0 | 0 | 0  |
| 0   | 0    | 0  | 0   | 0 | 0 | 0  |
| 0   | 0    | 0  | 0   | 0 | 0 | 0  |
| 0   | 0    | 0  | 0   | 0 | 0 | 0  |
| 0   | 0    | 0  | 0   | 0 | 0 | 0  |
| 0   | 0    | 0  | 0   | 0 | 0 | 0  |
| 0   | 0    | 0  | 0   | 0 | 0 | 0  |
| 0   | 3    | 0  | 0   | 0 | 0 | 0  |
| 0   | 0    | 0  | 0   | 0 | 0 | 0  |
| 0   | 3    | 0  | 0   | 0 | 0 | 0  |
| 0   | 33   | 0  | 0   | 0 | 0 | 0  |
| 0   | 0    | 0  | 0   | 0 | 0 | 0  |
| 0   | 3    | 0  | 0   | 0 | 0 | 0  |
| 6   | 0    | 0  | 0   | 0 | 0 | 0  |
| 0   | 0    | 0  | 0   | 0 | 0 | 0  |
| 0   | 0    | 0  | 0   | 0 | 0 | 0  |
| 2   | 0    | 2  | 0   | 0 | 0 | 0  |
| 0   | 2    | 0  | 0   | 0 | 0 | 0  |
| 0   | 0    | 0  | 0   | 0 | 0 | 0  |
| 121 | 2053 | 1  | 116 | 0 | 0 | 20 |
| 46  | 176  | 65 | 62  | 1 | 2 | 0  |
| 15  | 1    | 0  | 20  | 1 | 0 | 28 |
| 2   | 37   | 0  | 0   | 0 | 0 | 0  |
| 0   | 0    | 0  | 0   | 0 | 0 | 0  |
| 0   | 1    | 0  | 0   | 0 | 0 | 0  |
| 0   | 0    | 0  | 0   | 0 | 0 | 0  |
| 0   | 0    | 0  | 0   | 0 | 0 | 0  |
| 0   | 0    | 0  | 0   | 0 | 0 | 0  |

|     |    |    |     |      |       |      |
|-----|----|----|-----|------|-------|------|
| 0   | 0  | 0  | 0   | 0    | 0     | 0    |
| 0   | 0  | 0  | 0   | 2    | 0     | 3    |
| 0   | 6  | 0  | 0   | 0    | 0     | 1    |
| 1   | 0  | 0  | 0   | 1    | 0     | 0    |
| 0   | 0  | 0  | 0   | 0    | 0     | 0    |
| 2   | 0  | 43 | 348 | 2263 | 41071 | 3932 |
| 0   | 0  | 0  | 4   | 23   | 280   | 28   |
| 0   | 0  | 0  | 0   | 1    | 23    | 1    |
| 0   | 0  | 0  | 2   | 5    | 9     | 6    |
| 0   | 0  | 0  | 0   | 1    | 14    | 1    |
| 6   | 0  | 0  | 0   | 0    | 0     | 0    |
| 0   | 0  | 0  | 0   | 0    | 5     | 0    |
| 0   | 0  | 0  | 0   | 0    | 1     | 0    |
| 0   | 1  | 0  | 0   | 0    | 0     | 0    |
| 0   | 0  | 0  | 0   | 0    | 0     | 0    |
| 0   | 0  | 0  | 98  | 0    | 0     | 21   |
| 0   | 8  | 0  | 0   | 0    | 0     | 0    |
| 0   | 0  | 0  | 0   | 0    | 0     | 0    |
| 0   | 0  | 0  | 0   | 0    | 48    | 5    |
| 74  | 1  | 0  | 0   | 0    | 0     | 0    |
| 0   | 0  | 0  | 0   | 0    | 0     | 0    |
| 0   | 0  | 0  | 0   | 0    | 0     | 0    |
| 0   | 36 | 0  | 1   | 0    | 0     | 0    |
| 0   | 50 | 0  | 0   | 0    | 0     | 0    |
| 0   | 0  | 0  | 0   | 0    | 0     | 0    |
| 0   | 0  | 0  | 0   | 0    | 1     | 0    |
| 0   | 0  | 0  | 0   | 0    | 0     | 0    |
| 55  | 4  | 0  | 0   | 0    | 0     | 0    |
| 1   | 2  | 10 | 3   | 0    | 0     | 8    |
| 0   | 0  | 0  | 0   | 0    | 0     | 0    |
| 0   | 2  | 0  | 0   | 0    | 0     | 0    |
| 0   | 0  | 0  | 0   | 0    | 0     | 0    |
| 0   | 7  | 0  | 0   | 0    | 0     | 0    |
| 0   | 10 | 0  | 0   | 0    | 0     | 0    |
| 2   | 13 | 0  | 0   | 0    | 0     | 0    |
| 0   | 18 | 0  | 0   | 0    | 0     | 0    |
| 0   | 0  | 0  | 0   | 0    | 0     | 0    |
| 0   | 0  | 0  | 0   | 0    | 0     | 0    |
| 0   | 0  | 0  | 0   | 0    | 0     | 0    |
| 0   | 5  | 0  | 0   | 0    | 0     | 0    |
| 0   | 0  | 2  | 1   | 0    | 0     | 0    |
| 0   | 2  | 0  | 0   | 0    | 0     | 0    |
| 0   | 0  | 0  | 0   | 0    | 0     | 0    |
| 0   | 0  | 0  | 0   | 0    | 0     | 0    |
| 148 | 1  | 0  | 6   | 30   | 6758  | 3567 |
| 0   | 0  | 0  | 0   | 0    | 0     | 0    |
| 0   | 0  | 0  | 0   | 0    | 0     | 0    |
| 0   | 0  | 1  | 1   | 0    | 0     | 0    |









|      |      |    |     |    |    |    |
|------|------|----|-----|----|----|----|
| 0    | 0    | 0  | 0   | 0  | 0  | 0  |
| 0    | 3    | 0  | 0   | 0  | 0  | 0  |
| 0    | 0    | 0  | 0   | 0  | 0  | 0  |
| 1    | 16   | 0  | 0   | 0  | 0  | 0  |
| 0    | 0    | 0  | 0   | 0  | 0  | 0  |
| 0    | 0    | 0  | 0   | 0  | 0  | 0  |
| 10   | 13   | 1  | 99  | 0  | 1  | 49 |
| 0    | 0    | 0  | 0   | 0  | 0  | 0  |
| 0    | 0    | 0  | 0   | 0  | 0  | 0  |
| 0    | 0    | 0  | 0   | 0  | 0  | 0  |
| 0    | 0    | 0  | 0   | 0  | 0  | 0  |
| 5662 | 3768 | 13 | 466 | 14 | 16 | 58 |
| 34   | 228  | 0  | 142 | 0  | 0  | 3  |
| 93   | 174  | 0  | 14  | 0  | 0  | 8  |
| 2    | 53   | 1  | 0   | 0  | 2  | 5  |
| 38   | 222  | 0  | 79  | 0  | 0  | 16 |
| 201  | 66   | 1  | 0   | 5  | 0  | 0  |
| 1    | 45   | 0  | 0   | 0  | 0  | 0  |
| 15   | 9    | 0  | 38  | 0  | 0  | 5  |
| 0    | 0    | 1  | 0   | 0  | 0  | 0  |
| 0    | 3    | 0  | 10  | 0  | 0  | 0  |
| 0    | 0    | 0  | 0   | 0  | 0  | 0  |
| 0    | 3    | 0  | 0   | 0  | 0  | 0  |
| 0    | 58   | 0  | 0   | 0  | 0  | 0  |
| 0    | 6    | 0  | 31  | 0  | 0  | 9  |
| 0    | 0    | 0  | 0   | 0  | 1  | 0  |
| 0    | 0    | 0  | 2   | 0  | 0  | 0  |
| 0    | 0    | 0  | 0   | 0  | 0  | 0  |
| 0    | 0    | 0  | 0   | 0  | 0  | 0  |
| 0    | 15   | 3  | 0   | 0  | 0  | 4  |
| 0    | 54   | 0  | 0   | 0  | 0  | 0  |
| 0    | 4    | 0  | 0   | 0  | 0  | 3  |
| 0    | 0    | 0  | 0   | 0  | 0  | 0  |
| 0    | 0    | 28 | 7   | 83 | 0  | 0  |
| 0    | 1    | 0  | 0   | 0  | 0  | 0  |
| 65   | 4    | 0  | 0   | 0  | 0  | 0  |
| 264  | 112  | 1  | 16  | 1  | 0  | 1  |
| 0    | 13   | 0  | 0   | 0  | 0  | 0  |
| 0    | 0    | 0  | 0   | 0  | 0  | 0  |
| 0    | 19   | 0  | 0   | 0  | 1  | 0  |
| 0    | 0    | 0  | 0   | 0  | 0  | 0  |
| 0    | 0    | 0  | 0   | 0  | 0  | 0  |
| 0    | 0    | 0  | 0   | 0  | 0  | 0  |
| 0    | 15   | 0  | 0   | 0  | 0  | 0  |
| 0    | 0    | 0  | 0   | 0  | 0  | 0  |
| 0    | 8    | 0  | 0   | 0  | 0  | 0  |
| 0    | 0    | 0  | 0   | 0  | 0  | 0  |
| 0    | 0    | 0  | 0   | 0  | 0  | 0  |







|       |     |       |      |     |       |       |
|-------|-----|-------|------|-----|-------|-------|
| 0     | 0   | 162   | 116  | 55  | 544   | 160   |
| 0     | 0   | 0     | 0    | 0   | 0     | 0     |
| 20963 | 727 | 10    | 48   | 3   | 2     | 10    |
| 3916  | 2   | 0     | 0    | 0   | 0     | 0     |
| 0     | 0   | 0     | 0    | 0   | 0     | 0     |
| 15    | 0   | 0     | 0    | 0   | 0     | 0     |
| 0     | 0   | 0     | 0    | 0   | 0     | 0     |
| 6     | 0   | 0     | 0    | 0   | 0     | 0     |
| 8     | 0   | 0     | 0    | 0   | 0     | 0     |
| 3     | 0   | 0     | 0    | 0   | 0     | 0     |
| 0     | 22  | 0     | 0    | 0   | 0     | 0     |
| 0     | 0   | 0     | 0    | 0   | 0     | 0     |
| 0     | 0   | 0     | 0    | 0   | 0     | 0     |
| 0     | 0   | 0     | 0    | 0   | 0     | 0     |
| 0     | 0   | 0     | 0    | 0   | 0     | 0     |
| 0     | 1   | 0     | 0    | 0   | 0     | 0     |
| 0     | 0   | 0     | 0    | 0   | 0     | 0     |
| 0     | 0   | 0     | 0    | 0   | 0     | 0     |
| 0     | 0   | 0     | 0    | 0   | 0     | 0     |
| 0     | 0   | 0     | 0    | 0   | 0     | 0     |
| 0     | 0   | 0     | 0    | 0   | 4     | 0     |
| 1     | 0   | 0     | 0    | 0   | 0     | 0     |
| 35    | 0   | 0     | 0    | 0   | 0     | 0     |
| 0     | 10  | 76    | 98   | 1   | 0     | 496   |
| 0     | 23  | 0     | 0    | 0   | 0     | 0     |
| 0     | 0   | 0     | 0    | 0   | 0     | 0     |
| 0     | 3   | 0     | 0    | 0   | 0     | 0     |
| 0     | 0   | 1     | 181  | 5   | 24127 | 15559 |
| 0     | 0   | 0     | 0    | 0   | 0     | 0     |
| 0     | 0   | 0     | 0    | 0   | 0     | 0     |
| 0     | 6   | 0     | 0    | 0   | 0     | 0     |
| 0     | 3   | 0     | 3    | 0   | 0     | 0     |
| 0     | 0   | 0     | 0    | 0   | 0     | 0     |
| 0     | 0   | 0     | 0    | 0   | 14    | 7     |
| 0     | 0   | 0     | 0    | 0   | 0     | 0     |
| 0     | 0   | 336   | 1    | 1   | 0     | 0     |
| 1     | 0   | 39    | 0    | 0   | 0     | 0     |
| 0     | 0   | 0     | 0    | 0   | 3     | 1     |
| 0     | 0   | 0     | 0    | 0   | 0     | 3     |
| 0     | 0   | 0     | 0    | 0   | 3     | 0     |
| 203   | 103 | 0     | 0    | 0   | 0     | 0     |
| 0     | 0   | 403   | 121  | 34  | 0     | 137   |
| 0     | 2   | 0     | 0    | 0   | 0     | 0     |
| 662   | 757 | 2360  | 690  | 39  | 162   | 301   |
| 22    | 15  | 21840 | 8067 | 930 | 10    | 1511  |
| 200   | 70  | 650   | 193  | 177 | 12    | 378   |
| 9     | 195 | 0     | 13   | 51  | 888   | 133   |
| 294   | 59  | 0     | 155  | 26  | 0     | 4     |

|     |    |     |    |    |    |     |
|-----|----|-----|----|----|----|-----|
| 0   | 10 | 0   | 0  | 0  | 0  | 0   |
| 296 | 2  | 0   | 1  | 0  | 0  | 0   |
| 59  | 0  | 0   | 0  | 0  | 0  | 0   |
| 0   | 0  | 0   | 3  | 0  | 0  | 0   |
| 0   | 0  | 0   | 0  | 0  | 0  | 0   |
| 1   | 1  | 0   | 0  | 0  | 0  | 0   |
| 0   | 0  | 0   | 0  | 0  | 0  | 0   |
| 0   | 29 | 0   | 0  | 0  | 0  | 0   |
| 152 | 0  | 160 | 14 | 18 | 0  | 8   |
| 0   | 0  | 37  | 95 | 5  | 5  | 245 |
| 0   | 43 | 0   | 1  | 0  | 0  | 0   |
| 1   | 0  | 0   | 0  | 0  | 0  | 0   |
| 14  | 0  | 0   | 1  | 0  | 0  | 0   |
| 0   | 0  | 0   | 0  | 0  | 0  | 0   |
| 0   | 0  | 0   | 0  | 0  | 0  | 0   |
| 4   | 0  | 0   | 0  | 0  | 0  | 0   |
| 0   | 7  | 0   | 0  | 0  | 0  | 0   |
| 0   | 9  | 0   | 1  | 0  | 30 | 5   |
| 0   | 0  | 2   | 0  | 0  | 0  | 1   |
| 8   | 0  | 0   | 0  | 0  | 0  | 0   |
| 5   | 0  | 0   | 0  | 0  | 0  | 0   |
| 0   | 20 | 0   | 0  | 0  | 0  | 0   |
| 0   | 0  | 0   | 0  | 0  | 0  | 0   |
| 0   | 0  | 1   | 0  | 0  | 0  | 0   |
| 2   | 19 | 0   | 0  | 0  | 0  | 0   |
| 0   | 12 | 0   | 0  | 0  | 0  | 0   |
| 0   | 0  | 0   | 0  | 0  | 0  | 0   |
| 0   | 0  | 0   | 0  | 0  | 0  | 0   |
| 0   | 0  | 0   | 0  | 0  | 0  | 0   |
| 0   | 0  | 0   | 0  | 0  | 0  | 0   |
| 0   | 0  | 0   | 0  | 0  | 0  | 0   |
| 0   | 0  | 0   | 0  | 0  | 0  | 0   |
| 0   | 0  | 0   | 0  | 0  | 0  | 0   |
| 0   | 0  | 0   | 0  | 0  | 0  | 0   |
| 0   | 0  | 0   | 0  | 0  | 0  | 0   |
| 0   | 0  | 0   | 0  | 0  | 0  | 0   |
| 0   | 5  | 4   | 0  | 0  | 0  | 0   |
| 0   | 0  | 0   | 0  | 0  | 0  | 0   |
| 1   | 0  | 0   | 0  | 0  | 0  | 0   |
| 0   | 0  | 0   | 0  | 0  | 0  | 0   |
| 1   | 0  | 2   | 0  | 0  | 0  | 0   |
| 0   | 0  | 0   | 0  | 0  | 0  | 0   |
| 0   | 0  | 9   | 14 | 0  | 0  | 0   |
| 0   | 0  | 0   | 0  | 0  | 0  | 0   |
| 0   | 3  | 0   | 0  | 0  | 0  | 0   |
| 0   | 1  | 0   | 0  | 0  | 0  | 2   |
| 0   | 0  | 0   | 0  | 0  | 0  | 0   |
| 0   | 1  | 0   | 0  | 0  | 0  | 0   |
| 0   | 0  | 0   | 0  | 0  | 0  | 0   |
| 0   | 0  | 0   | 0  | 0  | 0  | 0   |
| 0   | 0  | 0   | 0  | 0  | 0  | 0   |



|     |     |     |     |    |      |      |
|-----|-----|-----|-----|----|------|------|
| 0   | 0   | 0   | 0   | 0  | 0    | 0    |
| 0   | 0   | 0   | 0   | 0  | 0    | 0    |
| 0   | 0   | 0   | 0   | 0  | 0    | 0    |
| 2   | 0   | 0   | 0   | 0  | 0    | 0    |
| 0   | 0   | 0   | 0   | 0  | 0    | 0    |
| 80  | 1   | 16  | 1   | 16 | 11   | 20   |
| 429 | 3   | 0   | 0   | 0  | 0    | 0    |
| 75  | 230 | 0   | 107 | 1  | 0    | 8    |
| 0   | 0   | 0   | 0   | 0  | 0    | 0    |
| 0   | 0   | 0   | 0   | 0  | 0    | 0    |
| 0   | 0   | 0   | 0   | 0  | 0    | 0    |
| 0   | 0   | 0   | 0   | 0  | 1    | 13   |
| 0   | 0   | 0   | 0   | 0  | 0    | 0    |
| 0   | 0   | 0   | 0   | 0  | 0    | 0    |
| 0   | 0   | 0   | 0   | 1  | 0    | 0    |
| 0   | 0   | 0   | 58  | 1  | 9836 | 3086 |
| 0   | 39  | 0   | 0   | 0  | 0    | 0    |
| 0   | 29  | 0   | 0   | 0  | 0    | 0    |
| 0   | 0   | 0   | 0   | 0  | 0    | 0    |
| 4   | 2   | 0   | 60  | 0  | 13   | 2    |
| 0   | 4   | 0   | 0   | 0  | 0    | 0    |
| 0   | 0   | 0   | 0   | 0  | 0    | 0    |
| 0   | 0   | 0   | 0   | 0  | 0    | 0    |
| 7   | 0   | 0   | 0   | 0  | 0    | 0    |
| 0   | 0   | 0   | 0   | 0  | 0    | 0    |
| 0   | 0   | 0   | 0   | 0  | 0    | 0    |
| 0   | 0   | 0   | 0   | 0  | 0    | 0    |
| 0   | 0   | 0   | 0   | 0  | 1    | 3    |
| 0   | 0   | 0   | 0   | 0  | 0    | 0    |
| 0   | 42  | 102 | 131 | 20 | 12   | 1330 |
| 14  | 0   | 0   | 2   | 0  | 0    | 0    |
| 0   | 0   | 0   | 0   | 0  | 0    | 0    |
| 0   | 0   | 0   | 0   | 0  | 0    | 0    |
| 0   | 0   | 0   | 0   | 0  | 0    | 0    |
| 2   | 0   | 0   | 0   | 0  | 0    | 0    |
| 1   | 21  | 0   | 0   | 0  | 0    | 0    |
| 14  | 7   | 0   | 34  | 0  | 0    | 1    |
| 1   | 0   | 0   | 0   | 0  | 0    | 3    |
| 0   | 0   | 0   | 0   | 0  | 0    | 0    |
| 0   | 0   | 0   | 0   | 0  | 0    | 0    |
| 0   | 0   | 0   | 0   | 0  | 0    | 0    |
| 7   | 0   | 0   | 7   | 0  | 0    | 0    |
| 0   | 0   | 0   | 0   | 0  | 0    | 0    |
| 0   | 0   | 0   | 0   | 0  | 0    | 0    |
| 0   | 0   | 1   | 3   | 0  | 64   | 66   |
| 0   | 0   | 0   | 0   | 0  | 0    | 0    |
| 0   | 0   | 0   | 0   | 0  | 0    | 0    |

|    |    |      |      |       |       |       |
|----|----|------|------|-------|-------|-------|
| 0  | 0  | 0    | 0    | 0     | 0     | 0     |
| 0  | 0  | 0    | 0    | 0     | 0     | 0     |
| 0  | 0  | 3    | 0    | 0     | 0     | 0     |
| 0  | 0  | 0    | 0    | 0     | 0     | 0     |
| 0  | 0  | 1    | 0    | 0     | 3     | 0     |
| 0  | 0  | 0    | 0    | 0     | 0     | 0     |
| 0  | 0  | 0    | 0    | 0     | 0     | 0     |
| 0  | 1  | 0    | 0    | 0     | 0     | 0     |
| 0  | 0  | 0    | 0    | 0     | 0     | 0     |
| 0  | 0  | 0    | 24   | 0     | 0     | 2     |
| 0  | 0  | 0    | 0    | 0     | 0     | 0     |
| 0  | 0  | 0    | 0    | 0     | 0     | 0     |
| 2  | 0  | 1528 | 1127 | 12934 | 61788 | 7974  |
| 0  | 0  | 180  | 388  | 109   | 164   | 33886 |
| 18 | 1  | 0    | 2    | 0     | 2     | 0     |
| 9  | 3  | 0    | 0    | 0     | 0     | 0     |
| 0  | 0  | 229  | 545  | 60    | 0     | 352   |
| 0  | 0  | 0    | 0    | 0     | 0     | 0     |
| 2  | 16 | 0    | 0    | 0     | 0     | 0     |
| 0  | 0  | 0    | 0    | 0     | 0     | 0     |
| 0  | 0  | 0    | 0    | 0     | 0     | 0     |
| 1  | 2  | 0    | 0    | 0     | 0     | 0     |
| 0  | 7  | 0    | 0    | 0     | 0     | 0     |
| 15 | 0  | 0    | 0    | 0     | 0     | 0     |
| 0  | 13 | 0    | 0    | 0     | 0     | 0     |
| 0  | 0  | 0    | 0    | 0     | 0     | 0     |
| 8  | 10 | 0    | 0    | 0     | 0     | 0     |
| 0  | 0  | 0    | 0    | 0     | 0     | 0     |
| 0  | 3  | 0    | 0    | 0     | 0     | 0     |
| 1  | 0  | 0    | 0    | 0     | 0     | 0     |
| 0  | 0  | 17   | 14   | 3     | 3     | 111   |
| 0  | 8  | 0    | 0    | 0     | 0     | 0     |
| 0  | 0  | 4    | 3    | 25    | 76    | 5     |
| 0  | 0  | 0    | 0    | 0     | 0     | 3     |
| 0  | 0  | 0    | 0    | 8     | 49    | 5     |
| 0  | 1  | 0    | 0    | 0     | 0     | 0     |
| 0  | 0  | 0    | 0    | 0     | 0     | 0     |
| 0  | 3  | 0    | 0    | 0     | 0     | 0     |
| 0  | 0  | 0    | 0    | 0     | 8     | 1     |
| 0  | 0  | 0    | 0    | 0     | 0     | 0     |
| 0  | 0  | 0    | 0    | 0     | 0     | 0     |
| 0  | 0  | 0    | 0    | 0     | 6     | 1     |
| 0  | 0  | 0    | 0    | 0     | 0     | 0     |
| 0  | 0  | 0    | 0    | 0     | 0     | 14    |
| 0  | 0  | 0    | 0    | 0     | 0     | 5     |
| 0  | 0  | 0    | 0    | 0     | 4     | 3     |
| 0  | 0  | 0    | 0    | 1     | 3     | 0     |
| 0  | 0  | 0    | 0    | 0     | 4     | 0     |

|     |     |      |      |      |        |        |
|-----|-----|------|------|------|--------|--------|
| 0   | 0   | 0    | 0    | 0    | 0      | 0      |
| 483 | 11  | 0    | 0    | 0    | 4      | 0      |
| 694 | 25  | 0    | 0    | 0    | 0      | 0      |
| 828 | 4   | 0    | 42   | 0    | 0      | 6      |
| 0   | 0   | 0    | 0    | 0    | 0      | 0      |
| 2   | 0   | 0    | 0    | 0    | 0      | 0      |
| 47  | 0   | 7    | 8    | 1    | 0      | 0      |
| 2   | 0   | 0    | 0    | 0    | 0      | 0      |
| 0   | 5   | 0    | 0    | 0    | 0      | 0      |
| 91  | 2   | 0    | 1    | 0    | 0      | 0      |
| 3   | 12  | 0    | 0    | 0    | 0      | 0      |
| 9   | 0   | 0    | 0    | 0    | 0      | 0      |
| 0   | 0   | 1    | 0    | 0    | 0      | 0      |
| 0   | 0   | 3    | 7    | 80   | 0      | 0      |
| 10  | 0   | 0    | 0    | 0    | 0      | 0      |
| 0   | 1   | 0    | 0    | 0    | 0      | 0      |
| 0   | 0   | 0    | 0    | 0    | 0      | 0      |
| 0   | 0   | 0    | 0    | 0    | 0      | 0      |
| 1   | 0   | 0    | 0    | 0    | 0      | 0      |
| 0   | 0   | 0    | 0    | 0    | 0      | 0      |
| 5   | 0   | 0    | 0    | 0    | 0      | 0      |
| 0   | 0   | 0    | 0    | 0    | 0      | 0      |
| 0   | 0   | 0    | 0    | 0    | 0      | 0      |
| 0   | 0   | 0    | 0    | 0    | 0      | 0      |
| 0   | 3   | 0    | 0    | 0    | 0      | 0      |
| 0   | 0   | 0    | 0    | 0    | 0      | 0      |
| 0   | 0   | 0    | 0    | 0    | 0      | 0      |
| 0   | 0   | 0    | 0    | 0    | 0      | 0      |
| 0   | 0   | 0    | 0    | 0    | 0      | 0      |
| 1   | 0   | 0    | 0    | 0    | 0      | 0      |
| 1   | 0   | 0    | 0    | 0    | 0      | 0      |
| 0   | 0   | 0    | 0    | 0    | 0      | 0      |
| 0   | 248 | 1005 | 3340 | 50   | 245863 | 120917 |
| 129 | 4   | 6010 | 1310 | 4136 | 94708  | 31949  |
| 6   | 2   | 1    | 43   | 0    | 0      | 0      |
| 1   | 414 | 0    | 39   | 0    | 0      | 0      |
| 0   | 1   | 0    | 1    | 0    | 1      | 3      |
| 0   | 0   | 0    | 0    | 0    | 0      | 0      |
| 0   | 87  | 0    | 0    | 0    | 0      | 0      |
| 1   | 79  | 7    | 12   | 0    | 0      | 2      |
| 405 | 1   | 0    | 0    | 0    | 0      | 0      |
| 13  | 1   | 0    | 0    | 0    | 0      | 0      |
| 0   | 0   | 0    | 0    | 0    | 0      | 0      |
| 0   | 84  | 27   | 32   | 1    | 0      | 0      |
| 33  | 2   | 0    | 0    | 0    | 0      | 0      |
| 16  | 0   | 0    | 0    | 0    | 0      | 0      |
| 0   | 0   | 0    | 0    | 0    | 0      | 0      |
| 0   | 1   | 0    | 0    | 0    | 0      | 0      |

|   |    |     |    |    |      |      |
|---|----|-----|----|----|------|------|
| 0 | 0  | 0   | 0  | 0  | 0    | 0    |
| 0 | 0  | 0   | 0  | 0  | 17   | 0    |
| 0 | 0  | 0   | 0  | 0  | 0    | 0    |
| 0 | 0  | 0   | 0  | 0  | 0    | 0    |
| 0 | 0  | 0   | 0  | 7  | 6    | 0    |
| 0 | 0  | 0   | 0  | 0  | 0    | 0    |
| 0 | 0  | 0   | 1  | 0  | 3    | 17   |
| 0 | 0  | 0   | 0  | 0  | 11   | 0    |
| 0 | 0  | 0   | 1  | 0  | 15   | 17   |
| 0 | 0  | 0   | 1  | 0  | 31   | 26   |
| 0 | 0  | 0   | 2  | 0  | 25   | 21   |
| 0 | 0  | 0   | 0  | 0  | 0    | 0    |
| 0 | 0  | 19  | 4  | 12 | 0    | 0    |
| 0 | 0  | 0   | 0  | 0  | 0    | 0    |
| 0 | 0  | 0   | 0  | 0  | 0    | 0    |
| 0 | 0  | 0   | 0  | 0  | 0    | 0    |
| 0 | 0  | 0   | 0  | 0  | 3    | 0    |
| 0 | 0  | 0   | 0  | 0  | 3    | 0    |
| 0 | 11 | 0   | 0  | 0  | 0    | 0    |
| 0 | 0  | 0   | 0  | 0  | 0    | 0    |
| 0 | 0  | 0   | 0  | 0  | 16   | 14   |
| 0 | 0  | 0   | 1  | 0  | 9    | 8    |
| 0 | 0  | 0   | 0  | 0  | 0    | 0    |
| 0 | 0  | 169 | 25 | 3  | 0    | 0    |
| 0 | 0  | 0   | 0  | 0  | 0    | 0    |
| 0 | 0  | 0   | 0  | 0  | 0    | 0    |
| 0 | 0  | 0   | 0  | 0  | 0    | 0    |
| 0 | 0  | 0   | 0  | 0  | 0    | 0    |
| 0 | 1  | 0   | 0  | 0  | 0    | 0    |
| 0 | 12 | 0   | 1  | 0  | 0    | 0    |
| 0 | 1  | 0   | 0  | 0  | 0    | 0    |
| 0 | 0  | 0   | 0  | 0  | 0    | 0    |
| 0 | 1  | 0   | 0  | 0  | 0    | 0    |
| 0 | 0  | 0   | 0  | 0  | 0    | 0    |
| 0 | 0  | 0   | 0  | 0  | 0    | 0    |
| 0 | 0  | 0   | 0  | 0  | 0    | 0    |
| 0 | 0  | 0   | 0  | 0  | 0    | 0    |
| 0 | 0  | 0   | 0  | 0  | 0    | 0    |
| 0 | 0  | 0   | 0  | 0  | 0    | 0    |
| 0 | 0  | 0   | 0  | 0  | 0    | 0    |
| 0 | 0  | 0   | 0  | 0  | 0    | 0    |
| 0 | 0  | 0   | 0  | 0  | 0    | 0    |
| 0 | 0  | 66  | 16 | 1  | 5627 | 3478 |
| 0 | 10 | 0   | 0  | 0  | 0    | 0    |
| 0 | 0  | 0   | 0  | 0  | 0    | 0    |
| 1 | 0  | 0   | 1  | 10 | 81   | 9    |
| 0 | 0  | 0   | 0  | 0  | 0    | 0    |
| 0 | 0  | 0   | 0  | 0  | 0    | 0    |
| 6 | 0  | 0   | 0  | 0  | 0    | 0    |
| 0 | 0  | 0   | 0  | 0  | 0    | 0    |

|      |      |     |      |       |       |        |
|------|------|-----|------|-------|-------|--------|
| 303  | 1835 | 62  | 508  | 36086 | 79049 | 18225  |
| 52   | 129  | 0   | 3    | 12    | 12    | 9      |
| 0    | 0    | 2   | 0    | 5     | 2     | 2786   |
| 0    | 0    | 0   | 0    | 0     | 0     | 0      |
| 4    | 5    | 0   | 10   | 1     | 9     | 436    |
| 1    | 4    | 139 | 21   | 4     | 3     | 0      |
| 0    | 0    | 0   | 0    | 0     | 10    | 3      |
| 0    | 0    | 0   | 0    | 0     | 2     | 0      |
| 0    | 0    | 0   | 0    | 7     | 15    | 2      |
| 0    | 0    | 0   | 0    | 4     | 8     | 5      |
| 0    | 0    | 0   | 0    | 1     | 8     | 1      |
| 0    | 0    | 0   | 0    | 4     | 5     | 1      |
| 0    | 28   | 0   | 2    | 1     | 0     | 0      |
| 0    | 163  | 0   | 0    | 0     | 0     | 8      |
| 1    | 6    | 0   | 0    | 0     | 0     | 0      |
| 0    | 0    | 0   | 0    | 0     | 0     | 0      |
| 0    | 0    | 0   | 0    | 0     | 0     | 0      |
| 0    | 0    | 0   | 0    | 0     | 0     | 0      |
| 0    | 0    | 0   | 0    | 0     | 0     | 0      |
| 2    | 5    | 0   | 0    | 0     | 0     | 0      |
| 0    | 0    | 0   | 0    | 0     | 0     | 0      |
| 0    | 0    | 0   | 0    | 0     | 0     | 0      |
| 0    | 1    | 0   | 0    | 0     | 0     | 0      |
| 0    | 0    | 0   | 0    | 0     | 0     | 0      |
| 43   | 38   | 1   | 5    | 38    | 75    | 45     |
| 0    | 0    | 0   | 0    | 0     | 0     | 0      |
| 0    | 0    | 0   | 0    | 0     | 0     | 0      |
| 335  | 11   | 8   | 9516 | 2161  | 118   | 419970 |
| 4    | 2    | 1   | 1    | 0     | 0     | 0      |
| 4762 | 101  | 1   | 0    | 0     | 0     | 0      |
| 198  | 15   | 1   | 45   | 0     | 1     | 4      |
| 0    | 1    | 0   | 2    | 0     | 0     | 0      |
| 127  | 3    | 0   | 9    | 0     | 4     | 1      |
| 0    | 0    | 0   | 0    | 0     | 0     | 0      |
| 213  | 6    | 0   | 0    | 0     | 0     | 0      |
| 144  | 1    | 0   | 45   | 0     | 0     | 0      |
| 40   | 8    | 0   | 0    | 0     | 0     | 0      |
| 0    | 9    | 0   | 0    | 0     | 0     | 0      |
| 0    | 0    | 0   | 4    | 1     | 1     | 247    |
| 0    | 0    | 0   | 0    | 0     | 0     | 0      |
| 0    | 0    | 0   | 1    | 0     | 0     | 29     |
| 0    | 0    | 0   | 1    | 0     | 0     | 4      |
| 0    | 0    | 0   | 1    | 0     | 0     | 11     |
| 46   | 5    | 0   | 9    | 2     | 2     | 255    |
| 849  | 42   | 0   | 33   | 5     | 2     | 1293   |
| 17   | 0    | 0   | 0    | 0     | 0     | 0      |
| 0    | 0    | 0   | 17   | 0     | 0     | 0      |
| 0    | 0    | 0   | 65   | 0     | 0     | 0      |

|       |      |      |     |      |    |     |
|-------|------|------|-----|------|----|-----|
| 0     | 0    | 0    | 0   | 0    | 0  | 0   |
| 0     | 0    | 0    | 0   | 0    | 0  | 0   |
| 1     | 0    | 0    | 1   | 0    | 0  | 0   |
| 3     | 0    | 0    | 0   | 0    | 0  | 0   |
| 0     | 0    | 0    | 0   | 0    | 0  | 0   |
| 4     | 0    | 0    | 0   | 0    | 0  | 0   |
| 0     | 0    | 0    | 0   | 0    | 0  | 3   |
| 89    | 9    | 0    | 0   | 0    | 0  | 0   |
| 24    | 0    | 0    | 0   | 0    | 0  | 0   |
| 1     | 62   | 0    | 0   | 3030 | 5  | 1   |
| 0     | 99   | 0    | 0   | 0    | 0  | 0   |
| 12    | 84   | 1    | 0   | 0    | 0  | 0   |
| 0     | 1    | 0    | 0   | 0    | 0  | 0   |
| 0     | 0    | 0    | 0   | 70   | 0  | 0   |
| 0     | 0    | 0    | 0   | 11   | 0  | 0   |
| 20849 | 1157 | 1224 | 78  | 1    | 9  | 8   |
| 246   | 183  | 93   | 6   | 0    | 0  | 2   |
| 1     | 0    | 0    | 0   | 0    | 0  | 0   |
| 0     | 10   | 0    | 0   | 0    | 0  | 0   |
| 0     | 0    | 0    | 0   | 0    | 0  | 0   |
| 37    | 3    | 0    | 1   | 0    | 0  | 0   |
| 0     | 0    | 0    | 0   | 0    | 0  | 0   |
| 0     | 0    | 0    | 0   | 0    | 0  | 0   |
| 0     | 0    | 0    | 0   | 0    | 0  | 0   |
| 123   | 19   | 0    | 0   | 0    | 0  | 0   |
| 0     | 0    | 0    | 1   | 0    | 0  | 0   |
| 11    | 1    | 0    | 0   | 0    | 0  | 0   |
| 0     | 0    | 0    | 0   | 0    | 0  | 0   |
| 102   | 13   | 0    | 0   | 0    | 0  | 0   |
| 103   | 3    | 0    | 0   | 0    | 0  | 0   |
| 758   | 118  | 0    | 0   | 0    | 0  | 0   |
| 1     | 3    | 0    | 2   | 0    | 0  | 0   |
| 74    | 6    | 19   | 17  | 0    | 0  | 0   |
| 0     | 0    | 0    | 0   | 0    | 0  | 0   |
| 0     | 0    | 0    | 0   | 0    | 0  | 0   |
| 0     | 0    | 0    | 0   | 0    | 0  | 0   |
| 0     | 0    | 0    | 0   | 0    | 0  | 0   |
| 1     | 0    | 0    | 0   | 0    | 0  | 0   |
| 234   | 685  | 597  | 241 | 3977 | 12 | 292 |
| 30    | 217  | 0    | 6   | 0    | 1  | 7   |
| 11    | 252  | 0    | 0   | 0    | 0  | 1   |
| 48    | 100  | 0    | 27  | 0    | 0  | 3   |
| 106   | 54   | 0    | 2   | 0    | 0  | 1   |
| 0     | 0    | 0    | 0   | 0    | 0  | 0   |
| 0     | 2    | 0    | 0   | 0    | 0  | 0   |
| 2     | 2    | 0    | 0   | 0    | 0  | 0   |
| 0     | 3    | 0    | 0   | 0    | 0  | 0   |
| 0     | 0    | 0    | 0   | 0    | 0  | 0   |

|      |     |     |     |     |     |      |
|------|-----|-----|-----|-----|-----|------|
| 0    | 0   | 3   | 0   | 0   | 0   | 0    |
| 0    | 0   | 0   | 0   | 170 | 1   | 9    |
| 0    | 0   | 0   | 0   | 0   | 0   | 0    |
| 0    | 0   | 0   | 0   | 16  | 0   | 2    |
| 0    | 1   | 0   | 0   | 0   | 0   | 0    |
| 0    | 0   | 0   | 0   | 0   | 0   | 0    |
| 0    | 2   | 0   | 0   | 0   | 0   | 0    |
| 1    | 1   | 0   | 0   | 0   | 0   | 0    |
| 0    | 0   | 0   | 0   | 0   | 0   | 0    |
| 0    | 0   | 1   | 0   | 0   | 0   | 0    |
| 0    | 0   | 0   | 0   | 0   | 0   | 0    |
| 0    | 0   | 0   | 0   | 0   | 0   | 0    |
| 106  | 0   | 0   | 0   | 0   | 0   | 0    |
| 0    | 0   | 0   | 1   | 0   | 13  | 23   |
| 17   | 11  | 0   | 0   | 0   | 0   | 0    |
| 455  | 6   | 0   | 0   | 0   | 2   | 0    |
| 9    | 18  | 0   | 0   | 0   | 0   | 1    |
| 0    | 0   | 0   | 0   | 0   | 0   | 0    |
| 19   | 8   | 0   | 0   | 0   | 0   | 1    |
| 0    | 0   | 0   | 0   | 0   | 0   | 0    |
| 8    | 2   | 0   | 0   | 0   | 0   | 0    |
| 0    | 0   | 0   | 0   | 0   | 0   | 0    |
| 0    | 0   | 0   | 0   | 0   | 0   | 0    |
| 0    | 0   | 0   | 0   | 0   | 0   | 0    |
| 0    | 0   | 0   | 0   | 0   | 0   | 0    |
| 5996 | 256 | 1   | 11  | 1   | 1   | 0    |
| 1241 | 155 | 0   | 0   | 0   | 0   | 1    |
| 12   | 31  | 0   | 0   | 0   | 0   | 0    |
| 0    | 0   | 0   | 0   | 0   | 0   | 0    |
| 4    | 1   | 0   | 0   | 0   | 0   | 0    |
| 0    | 136 | 0   | 3   | 0   | 0   | 0    |
| 55   | 2   | 2   | 4   | 530 | 0   | 397  |
| 0    | 0   | 0   | 0   | 0   | 0   | 0    |
| 0    | 0   | 0   | 0   | 0   | 0   | 0    |
| 0    | 2   | 0   | 0   | 0   | 0   | 1    |
| 0    | 0   | 0   | 0   | 0   | 0   | 0    |
| 0    | 0   | 0   | 0   | 0   | 0   | 0    |
| 0    | 0   | 0   | 0   | 0   | 0   | 0    |
| 2    | 0   | 0   | 0   | 0   | 0   | 0    |
| 0    | 0   | 0   | 0   | 0   | 0   | 0    |
| 2    | 0   | 0   | 0   | 0   | 0   | 0    |
| 0    | 0   | 0   | 0   | 0   | 0   | 0    |
| 0    | 1   | 331 | 504 | 159 | 209 | 5038 |
| 11   | 1   | 23  | 4   | 2   | 0   | 3433 |
| 112  | 0   | 0   | 0   | 0   | 0   | 0    |
| 0    | 1   | 0   | 0   | 0   | 0   | 0    |
| 1    | 0   | 0   | 0   | 0   | 0   | 0    |
| 0    | 0   | 0   | 0   | 1   | 0   | 0    |

|      |      |     |     |     |   |    |
|------|------|-----|-----|-----|---|----|
| 6    | 0    | 0   | 0   | 0   | 0 | 0  |
| 0    | 0    | 0   | 0   | 0   | 0 | 0  |
| 598  | 1220 | 169 | 861 | 9   | 4 | 21 |
| 1585 | 59   | 8   | 3   | 1   | 1 | 4  |
| 406  | 206  | 0   | 15  | 0   | 1 | 0  |
| 0    | 248  | 0   | 5   | 0   | 1 | 7  |
| 172  | 127  | 8   | 58  | 0   | 0 | 0  |
| 13   | 690  | 0   | 15  | 0   | 0 | 58 |
| 2    | 19   | 0   | 68  | 0   | 1 | 12 |
| 70   | 0    | 0   | 0   | 0   | 0 | 0  |
| 0    | 65   | 0   | 36  | 0   | 0 | 3  |
| 0    | 129  | 0   | 0   | 0   | 0 | 0  |
| 9    | 15   | 0   | 2   | 0   | 0 | 0  |
| 0    | 2    | 0   | 0   | 0   | 0 | 0  |
| 180  | 384  | 0   | 0   | 0   | 0 | 1  |
| 0    | 38   | 0   | 0   | 0   | 0 | 0  |
| 3    | 349  | 0   | 0   | 0   | 0 | 0  |
| 2    | 6    | 0   | 0   | 0   | 0 | 0  |
| 77   | 40   | 0   | 26  | 1   | 0 | 0  |
| 0    | 205  | 0   | 0   | 0   | 0 | 0  |
| 7    | 4    | 5   | 1   | 0   | 0 | 0  |
| 0    | 1    | 238 | 69  | 204 | 2 | 85 |
| 3    | 29   | 0   | 0   | 0   | 0 | 0  |
| 0    | 159  | 1   | 0   | 0   | 0 | 1  |
| 13   | 27   | 0   | 0   | 0   | 0 | 0  |
| 25   | 45   | 0   | 0   | 0   | 0 | 0  |
| 1    | 94   | 0   | 0   | 0   | 0 | 0  |
| 0    | 0    | 0   | 0   | 0   | 0 | 0  |
| 0    | 8    | 0   | 0   | 0   | 0 | 0  |
| 0    | 6    | 0   | 0   | 0   | 0 | 0  |
| 0    | 0    | 0   | 0   | 0   | 0 | 0  |
| 0    | 9    | 0   | 0   | 0   | 0 | 0  |
| 0    | 199  | 0   | 0   | 0   | 0 | 0  |
| 0    | 16   | 0   | 0   | 0   | 0 | 0  |
| 0    | 7    | 0   | 0   | 0   | 0 | 1  |
| 0    | 12   | 0   | 0   | 0   | 0 | 0  |
| 0    | 0    | 0   | 0   | 0   | 0 | 0  |
| 0    | 0    | 0   | 0   | 0   | 0 | 0  |
| 0    | 1    | 0   | 0   | 0   | 0 | 0  |
| 0    | 0    | 0   | 0   | 0   | 0 | 0  |
| 0    | 0    | 0   | 0   | 0   | 0 | 0  |
| 0    | 0    | 0   | 0   | 0   | 0 | 0  |
| 0    | 0    | 0   | 0   | 0   | 0 | 0  |
| 0    | 0    | 0   | 0   | 0   | 0 | 0  |
| 0    | 0    | 0   | 0   | 0   | 0 | 0  |
| 0    | 46   | 0   | 0   | 0   | 0 | 0  |
| 0    | 0    | 0   | 0   | 0   | 0 | 1  |
| 0    | 0    | 0   | 0   | 0   | 0 | 0  |
| 0    | 0    | 0   | 0   | 0   | 0 | 0  |





|      |      |       |       |      |       |       |
|------|------|-------|-------|------|-------|-------|
| 0    | 0    | 0     | 0     | 0    | 0     | 0     |
| 0    | 0    | 0     | 0     | 0    | 0     | 0     |
| 0    | 0    | 0     | 0     | 0    | 0     | 0     |
| 7    | 7    | 12    | 11    | 4    | 24    | 121   |
| 157  | 2    | 0     | 0     | 0    | 0     | 0     |
| 0    | 0    | 0     | 0     | 0    | 0     | 0     |
| 0    | 0    | 0     | 0     | 0    | 0     | 0     |
| 0    | 0    | 0     | 0     | 0    | 0     | 0     |
| 847  | 128  | 2814  | 1254  | 2337 | 22645 | 75713 |
| 7241 | 2199 | 34913 | 16027 | 5775 | 54783 | 57069 |
| 1    | 0    | 2529  | 1704  | 1262 | 572   | 12202 |
| 36   | 0    | 2503  | 71    | 639  | 8469  | 405   |
| 1048 | 134  | 6     | 36    | 0    | 3     | 3     |
| 337  | 3    | 416   | 391   | 11   | 0     | 0     |
| 2    | 71   | 0     | 1     | 0    | 1     | 1     |
| 28   | 47   | 23    | 3     | 14   | 66    | 2911  |
| 147  | 10   | 0     | 0     | 0    | 0     | 0     |
| 40   | 33   | 14    | 22    | 0    | 0     | 0     |
| 8    | 2    | 0     | 0     | 0    | 0     | 0     |
| 15   | 7    | 0     | 0     | 0    | 0     | 1     |
| 0    | 3    | 42    | 31    | 1    | 0     | 0     |
| 5    | 23   | 1     | 2     | 1    | 3     | 1     |
| 1    | 1    | 0     | 0     | 0    | 4     | 1     |
| 35   | 0    | 2     | 0     | 0    | 0     | 0     |
| 0    | 0    | 0     | 0     | 0    | 0     | 0     |
| 1    | 9    | 7     | 3     | 1    | 9     | 21    |
| 4    | 3    | 0     | 0     | 0    | 0     | 0     |
| 13   | 6    | 34    | 39    | 2    | 8     | 55    |
| 1    | 0    | 0     | 0     | 0    | 1     | 2     |
| 0    | 0    | 0     | 0     | 0    | 0     | 0     |
| 12   | 1    | 10    | 1     | 0    | 31    | 3     |
| 15   | 0    | 0     | 0     | 0    | 0     | 0     |
| 7    | 2    | 5     | 10    | 12   | 48    | 237   |
| 2    | 7    | 2     | 1     | 0    | 11    | 26    |
| 3    | 0    | 0     | 0     | 0    | 0     | 0     |
| 0    | 0    | 4     | 0     | 0    | 0     | 0     |
| 1    | 13   | 4     | 0     | 5    | 6     | 25    |
| 0    | 0    | 0     | 0     | 0    | 0     | 0     |
| 0    | 0    | 0     | 0     | 0    | 0     | 0     |
| 0    | 0    | 0     | 0     | 0    | 0     | 0     |
| 0    | 4    | 0     | 0     | 0    | 0     | 0     |
| 0    | 0    | 0     | 0     | 0    | 0     | 0     |
| 0    | 0    | 0     | 0     | 0    | 0     | 0     |
| 0    | 0    | 0     | 0     | 0    | 0     | 0     |
| 0    | 0    | 0     | 0     | 0    | 0     | 0     |
| 0    | 0    | 0     | 0     | 0    | 0     | 2     |
| 0    | 0    | 0     | 0     | 0    | 0     | 0     |
| 2    | 0    | 6     | 2     | 0    | 53    | 11    |
| 0    | 0    | 0     | 0     | 0    | 0     | 0     |

|   |    |    |    |    |     |     |
|---|----|----|----|----|-----|-----|
| 0 | 0  | 0  | 0  | 0  | 0   | 0   |
| 9 | 3  | 3  | 0  | 0  | 527 | 21  |
| 0 | 0  | 0  | 0  | 1  | 20  | 1   |
| 0 | 0  | 0  | 1  | 0  | 0   | 0   |
| 0 | 0  | 0  | 0  | 0  | 0   | 0   |
| 0 | 1  | 9  | 46 | 14 | 28  | 2   |
| 0 | 1  | 0  | 0  | 0  | 0   | 0   |
| 6 | 12 | 21 | 20 | 1  | 0   | 6   |
| 1 | 0  | 5  | 1  | 2  | 10  | 7   |
| 0 | 0  | 0  | 0  | 0  | 6   | 15  |
| 0 | 0  | 0  | 3  | 0  | 3   | 10  |
| 0 | 1  | 1  | 4  | 1  | 1   | 11  |
| 0 | 0  | 0  | 1  | 0  | 12  | 7   |
| 0 | 1  | 0  | 2  | 0  | 3   | 158 |
| 0 | 0  | 0  | 0  | 0  | 0   | 0   |
| 0 | 0  | 6  | 3  | 1  | 1   | 8   |
| 0 | 0  | 0  | 0  | 0  | 0   | 0   |
| 0 | 0  | 0  | 0  | 0  | 2   | 6   |
| 0 | 0  | 1  | 1  | 0  | 0   | 13  |
| 1 | 0  | 0  | 0  | 0  | 0   | 9   |
| 0 | 0  | 0  | 0  | 0  | 11  | 0   |
| 0 | 0  | 0  | 0  | 0  | 0   | 0   |
| 1 | 0  | 0  | 0  | 0  | 0   | 0   |
| 0 | 0  | 0  | 0  | 0  | 0   | 0   |
| 0 | 0  | 0  | 0  | 0  | 0   | 0   |
| 0 | 0  | 1  | 0  | 0  | 0   | 5   |
| 1 | 0  | 0  | 0  | 0  | 0   | 0   |
| 0 | 0  | 0  | 0  | 0  | 0   | 0   |
| 0 | 0  | 0  | 0  | 0  | 0   | 0   |
| 0 | 0  | 0  | 0  | 0  | 4   | 1   |
| 1 | 1  | 0  | 1  | 0  | 1   | 16  |
| 0 | 0  | 0  | 0  | 0  | 0   | 0   |
| 0 | 0  | 0  | 0  | 0  | 0   | 0   |
| 0 | 0  | 0  | 0  | 0  | 0   | 10  |
| 3 | 0  | 0  | 0  | 0  | 0   | 0   |
| 0 | 0  | 0  | 0  | 0  | 0   | 0   |
| 0 | 0  | 0  | 0  | 0  | 0   | 4   |
| 0 | 0  | 0  | 0  | 0  | 0   | 0   |
| 0 | 0  | 0  | 1  | 3  | 0   | 0   |
| 0 | 0  | 0  | 0  | 0  | 2   | 4   |
| 0 | 0  | 0  | 0  | 0  | 2   | 3   |
| 0 | 0  | 0  | 0  | 0  | 6   | 0   |
| 0 | 0  | 0  | 0  | 0  | 0   | 0   |
| 0 | 0  | 0  | 1  | 0  | 0   | 0   |
| 0 | 0  | 0  | 0  | 0  | 0   | 0   |
| 0 | 0  | 0  | 0  | 0  | 0   | 0   |
| 0 | 0  | 0  | 0  | 0  | 0   | 2   |
| 0 | 0  | 0  | 0  | 0  | 0   | 0   |
| 0 | 1  | 0  | 1  | 0  | 0   | 0   |

|       |     |      |      |       |       |      |
|-------|-----|------|------|-------|-------|------|
| 0     | 0   | 0    | 0    | 0     | 0     | 0    |
| 1517  | 117 | 2732 | 939  | 28    | 4     | 20   |
| 40    | 311 | 54   | 56   | 23    | 66    | 225  |
| 132   | 6   | 129  | 71   | 3     | 0     | 0    |
| 383   | 0   | 0    | 0    | 0     | 0     | 0    |
| 70    | 12  | 0    | 0    | 0     | 0     | 0    |
| 24    | 8   | 62   | 43   | 0     | 0     | 0    |
| 114   | 0   | 0    | 0    | 0     | 0     | 0    |
| 9     | 5   | 0    | 0    | 0     | 0     | 0    |
| 50    | 66  | 1422 | 713  | 327   | 39    | 36   |
| 6     | 7   | 0    | 0    | 0     | 0     | 0    |
| 29    | 19  | 29   | 14   | 9     | 1     | 0    |
| 4     | 2   | 86   | 52   | 45    | 0     | 0    |
| 0     | 0   | 0    | 0    | 0     | 0     | 0    |
| 2     | 0   | 0    | 0    | 0     | 0     | 0    |
| 0     | 0   | 0    | 0    | 0     | 0     | 0    |
| 24    | 7   | 1065 | 355  | 202   | 45    | 22   |
| 9     | 4   | 0    | 19   | 0     | 0     | 4    |
| 2     | 2   | 4    | 1    | 0     | 0     | 0    |
| 1     | 0   | 8    | 4    | 0     | 0     | 0    |
| 0     | 3   | 1    | 1    | 0     | 1     | 18   |
| 1     | 0   | 119  | 32   | 15    | 7     | 4    |
| 1     | 0   | 1    | 0    | 0     | 0     | 0    |
| 0     | 8   | 0    | 0    | 0     | 0     | 0    |
| 0     | 0   | 0    | 0    | 0     | 0     | 0    |
| 4     | 0   | 0    | 0    | 0     | 0     | 0    |
| 0     | 0   | 0    | 0    | 0     | 0     | 0    |
| 0     | 1   | 23   | 8    | 4     | 0     | 0    |
| 0     | 0   | 7    | 6    | 0     | 1     | 0    |
| 0     | 1   | 0    | 1    | 0     | 0     | 0    |
| 0     | 0   | 4    | 0    | 0     | 1     | 0    |
| 0     | 0   | 0    | 0    | 0     | 0     | 0    |
| 0     | 0   | 3    | 0    | 1     | 0     | 0    |
| 1     | 0   | 15   | 4    | 6     | 0     | 1    |
| 0     | 0   | 10   | 5    | 1     | 1     | 1    |
| 0     | 0   | 3    | 0    | 0     | 0     | 0    |
| 17474 | 83  | 8720 | 2164 | 18992 | 24727 | 1249 |
| 35    | 45  | 0    | 0    | 0     | 0     | 0    |
| 0     | 0   | 0    | 0    | 0     | 0     | 0    |
| 0     | 4   | 0    | 0    | 0     | 0     | 0    |
| 13    | 4   | 0    | 0    | 0     | 0     | 0    |
| 0     | 0   | 0    | 0    | 0     | 0     | 0    |
| 0     | 0   | 0    | 1    | 0     | 0     | 0    |
| 0     | 34  | 0    | 0    | 0     | 0     | 0    |
| 4     | 0   | 0    | 0    | 0     | 0     | 0    |
| 3     | 0   | 15   | 2    | 73    | 0     | 0    |
| 16    | 0   | 7    | 3    | 31    | 35    | 3    |
| 5     | 0   | 0    | 0    | 0     | 0     | 0    |

|     |    |     |     |     |    |      |
|-----|----|-----|-----|-----|----|------|
| 3   | 0  | 5   | 0   | 15  | 27 | 1    |
| 0   | 0  | 0   | 0   | 0   | 0  | 0    |
| 36  | 0  | 0   | 0   | 0   | 0  | 0    |
| 0   | 0  | 2   | 0   | 0   | 9  | 0    |
| 0   | 0  | 0   | 3   | 8   | 0  | 0    |
| 0   | 0  | 0   | 0   | 0   | 0  | 0    |
| 0   | 0  | 0   | 3   | 7   | 12 | 0    |
| 1   | 0  | 0   | 0   | 0   | 0  | 0    |
| 0   | 0  | 0   | 0   | 5   | 2  | 0    |
| 0   | 0  | 0   | 0   | 6   | 11 | 0    |
| 7   | 0  | 8   | 1   | 15  | 16 | 0    |
| 0   | 0  | 0   | 0   | 0   | 0  | 0    |
| 0   | 0  | 2   | 0   | 3   | 0  | 0    |
| 4   | 0  | 0   | 0   | 0   | 2  | 0    |
| 1   | 1  | 3   | 0   | 1   | 4  | 0    |
| 0   | 0  | 0   | 0   | 0   | 3  | 0    |
| 0   | 0  | 0   | 0   | 0   | 3  | 0    |
| 0   | 1  | 0   | 0   | 0   | 0  | 0    |
| 0   | 0  | 0   | 0   | 0   | 0  | 0    |
| 0   | 1  | 0   | 0   | 0   | 0  | 0    |
| 0   | 5  | 0   | 0   | 0   | 0  | 0    |
| 0   | 0  | 0   | 0   | 0   | 0  | 0    |
| 0   | 0  | 0   | 0   | 0   | 0  | 0    |
| 0   | 1  | 0   | 0   | 0   | 0  | 0    |
| 0   | 0  | 0   | 0   | 0   | 0  | 0    |
| 0   | 0  | 0   | 0   | 0   | 0  | 0    |
| 0   | 0  | 427 | 213 | 496 | 17 | 2860 |
| 0   | 0  | 0   | 0   | 0   | 0  | 0    |
| 0   | 0  | 129 | 0   | 0   | 0  | 0    |
| 0   | 1  | 0   | 0   | 0   | 0  | 0    |
| 0   | 0  | 0   | 0   | 0   | 0  | 0    |
| 0   | 0  | 0   | 0   | 0   | 0  | 0    |
| 0   | 0  | 0   | 0   | 0   | 0  | 0    |
| 817 | 5  | 1   | 2   | 1   | 0  | 1    |
| 2   | 0  | 1   | 0   | 0   | 0  | 0    |
| 669 | 18 | 0   | 0   | 0   | 0  | 0    |
| 9   | 0  | 0   | 0   | 0   | 0  | 0    |
| 0   | 0  | 0   | 0   | 0   | 0  | 0    |
| 4   | 0  | 0   | 0   | 0   | 0  | 0    |
| 1   | 0  | 0   | 0   | 0   | 0  | 0    |
| 0   | 0  | 17  | 39  | 0   | 0  | 0    |
| 0   | 0  | 0   | 0   | 0   | 0  | 0    |
| 495 | 2  | 2   | 11  | 0   | 0  | 0    |
| 0   | 5  | 1   | 1   | 0   | 71 | 60   |
| 74  | 0  | 0   | 0   | 0   | 0  | 0    |
| 0   | 0  | 0   | 0   | 0   | 0  | 0    |
| 0   | 0  | 9   | 13  | 93  | 31 | 4737 |
| 90  | 11 | 12  | 3   | 0   | 0  | 0    |

|      |    |   |    |    |   |      |
|------|----|---|----|----|---|------|
| 0    | 0  | 0 | 0  | 0  | 0 | 0    |
| 2662 | 29 | 0 | 1  | 0  | 0 | 1    |
| 18   | 3  | 1 | 8  | 0  | 0 | 0    |
| 0    | 0  | 1 | 0  | 0  | 0 | 0    |
| 0    | 0  | 0 | 0  | 0  | 0 | 0    |
| 0    | 0  | 0 | 0  | 0  | 0 | 4    |
| 0    | 0  | 0 | 0  | 0  | 0 | 0    |
| 0    | 0  | 0 | 0  | 0  | 0 | 0    |
| 0    | 0  | 0 | 0  | 0  | 0 | 0    |
| 51   | 14 | 0 | 0  | 0  | 0 | 2    |
| 2197 | 15 | 0 | 0  | 0  | 0 | 0    |
| 65   | 24 | 0 | 0  | 0  | 0 | 0    |
| 0    | 9  | 0 | 0  | 0  | 0 | 0    |
| 0    | 11 | 0 | 0  | 0  | 0 | 0    |
| 62   | 0  | 0 | 0  | 0  | 0 | 0    |
| 0    | 1  | 0 | 0  | 0  | 0 | 0    |
| 0    | 4  | 0 | 0  | 0  | 0 | 0    |
| 0    | 0  | 0 | 0  | 0  | 0 | 0    |
| 0    | 10 | 0 | 0  | 0  | 0 | 0    |
| 0    | 0  | 0 | 0  | 0  | 0 | 0    |
| 0    | 0  | 0 | 0  | 0  | 0 | 0    |
| 0    | 0  | 0 | 0  | 0  | 6 | 5    |
| 0    | 0  | 0 | 0  | 0  | 0 | 0    |
| 0    | 0  | 0 | 0  | 0  | 6 | 1    |
| 0    | 0  | 0 | 0  | 0  | 0 | 0    |
| 0    | 0  | 0 | 0  | 0  | 5 | 3    |
| 0    | 0  | 0 | 0  | 0  | 6 | 6    |
| 0    | 0  | 0 | 0  | 4  | 0 | 0    |
| 0    | 0  | 0 | 0  | 0  | 0 | 0    |
| 0    | 0  | 0 | 0  | 0  | 0 | 0    |
| 0    | 0  | 0 | 0  | 0  | 0 | 0    |
| 0    | 0  | 0 | 0  | 0  | 0 | 0    |
| 0    | 0  | 0 | 0  | 0  | 0 | 0    |
| 0    | 0  | 0 | 0  | 0  | 0 | 0    |
| 0    | 13 | 4 | 45 | 0  | 0 | 2    |
| 0    | 0  | 0 | 9  | 0  | 0 | 0    |
| 0    | 0  | 0 | 0  | 0  | 0 | 0    |
| 0    | 0  | 0 | 0  | 0  | 0 | 0    |
| 0    | 0  | 0 | 4  | 19 | 0 | 4080 |
| 2028 | 1  | 0 | 0  | 0  | 0 | 0    |
| 0    | 27 | 0 | 0  | 0  | 0 | 0    |
| 9    | 4  | 0 | 0  | 0  | 0 | 46   |
| 0    | 0  | 0 | 0  | 0  | 0 | 0    |
| 0    | 17 | 0 | 0  | 0  | 0 | 0    |
| 0    | 0  | 0 | 0  | 0  | 0 | 0    |
| 0    | 0  | 0 | 0  | 0  | 0 | 0    |
| 0    | 0  | 0 | 0  | 0  | 0 | 0    |
| 0    | 0  | 0 | 0  | 0  | 0 | 0    |

|    |      |   |     |    |   |    |
|----|------|---|-----|----|---|----|
| 0  | 1    | 0 | 0   | 0  | 0 | 0  |
| 0  | 0    | 0 | 0   | 0  | 0 | 0  |
| 0  | 0    | 0 | 0   | 0  | 0 | 0  |
| 0  | 46   | 0 | 0   | 0  | 0 | 0  |
| 0  | 0    | 2 | 0   | 0  | 0 | 0  |
| 0  | 0    | 0 | 0   | 0  | 0 | 0  |
| 5  | 18   | 9 | 37  | 98 | 0 | 6  |
| 0  | 18   | 0 | 0   | 0  | 0 | 0  |
| 0  | 0    | 0 | 0   | 0  | 0 | 0  |
| 0  | 0    | 0 | 0   | 0  | 0 | 0  |
| 0  | 1    | 0 | 0   | 0  | 0 | 0  |
| 0  | 0    | 0 | 0   | 0  | 0 | 0  |
| 0  | 7    | 0 | 0   | 0  | 0 | 0  |
| 0  | 0    | 0 | 0   | 0  | 0 | 0  |
| 31 | 2137 | 0 | 111 | 0  | 0 | 10 |
| 0  | 0    | 0 | 0   | 0  | 0 | 0  |
| 0  | 0    | 0 | 0   | 0  | 0 | 0  |
| 0  | 0    | 0 | 0   | 0  | 0 | 0  |
| 0  | 0    | 0 | 0   | 0  | 0 | 0  |
| 0  | 0    | 0 | 0   | 0  | 0 | 0  |
| 0  | 0    | 0 | 3   | 0  | 0 | 0  |
| 0  | 0    | 0 | 0   | 0  | 0 | 0  |
| 0  | 7    | 0 | 0   | 0  | 0 | 0  |
| 0  | 1    | 0 | 0   | 0  | 0 | 0  |
| 0  | 0    | 0 | 0   | 0  | 0 | 0  |
| 0  | 13   | 0 | 0   | 0  | 0 | 0  |
| 0  | 0    | 0 | 0   | 0  | 0 | 0  |

| 98.SUR | 98.DCM | 100.SUR | 100.DCM | 102.SUR | 102.DCM | 109.SUR |     |
|--------|--------|---------|---------|---------|---------|---------|-----|
| 0      | 0      | 0       | 0       | 0       | 0       | 0       | 0   |
| 0      | 0      | 0       | 0       | 0       | 0       | 0       | 11  |
| 0      | 0      | 0       | 0       | 2       | 0       | 0       | 104 |
| 0      | 0      | 0       | 0       | 2       | 0       | 0       | 19  |
| 0      | 0      | 0       | 0       | 0       | 7       | 0       | 0   |
| 0      | 0      | 0       | 0       | 0       | 0       | 0       | 0   |
| 0      | 0      | 0       | 0       | 0       | 0       | 0       | 0   |
| 0      | 0      | 0       | 0       | 83      | 0       | 0       | 7   |
| 0      | 0      | 0       | 0       | 28      | 0       | 0       | 0   |
| 0      | 1      | 0       | 0       | 0       | 0       | 0       | 0   |
| 0      | 0      | 0       | 0       | 0       | 0       | 0       | 0   |
| 0      | 0      | 0       | 0       | 0       | 0       | 0       | 0   |
| 0      | 0      | 0       | 0       | 0       | 0       | 0       | 1   |
| 0      | 0      | 0       | 0       | 0       | 0       | 0       | 5   |
| 0      | 0      | 0       | 0       | 0       | 0       | 0       | 0   |
| 0      | 0      | 0       | 0       | 0       | 0       | 0       | 0   |
| 2      | 0      | 7       | 172     | 6       | 0       | 0       | 375 |
| 140    | 72     | 346     | 671     | 572     | 59      | 0       | 673 |
| 0      | 0      | 0       | 0       | 0       | 0       | 0       | 1   |
| 0      | 2      | 0       | 4       | 0       | 0       | 0       | 5   |
| 0      | 0      | 12      | 1       | 0       | 0       | 0       | 0   |
| 0      | 0      | 5       | 0       | 0       | 0       | 0       | 0   |
| 0      | 0      | 0       | 0       | 0       | 0       | 0       | 6   |
| 0      | 0      | 5       | 0       | 0       | 0       | 0       | 0   |
| 0      | 0      | 0       | 0       | 0       | 0       | 0       | 0   |
| 0      | 0      | 0       | 0       | 0       | 0       | 0       | 0   |
| 0      | 0      | 0       | 0       | 0       | 0       | 0       | 0   |
| 0      | 0      | 0       | 0       | 0       | 0       | 0       | 0   |
| 0      | 0      | 1       | 5       | 0       | 0       | 0       | 0   |
| 0      | 0      | 0       | 4       | 0       | 0       | 0       | 9   |
| 0      | 0      | 0       | 0       | 0       | 0       | 0       | 0   |
| 0      | 0      | 0       | 76      | 87      | 2       | 0       | 24  |
| 0      | 0      | 1       | 7       | 0       | 0       | 0       | 0   |
| 0      | 0      | 0       | 3       | 0       | 0       | 0       | 0   |
| 0      | 0      | 0       | 0       | 0       | 0       | 0       | 0   |
| 0      | 449    | 1       | 2       | 0       | 3       | 0       | 59  |
| 127    | 98     | 0       | 50      | 9       | 8       | 0       | 351 |
| 5      | 24     | 12      | 46      | 43      | 23      | 0       | 8   |
| 0      | 1      | 0       | 0       | 0       | 0       | 0       | 42  |
| 0      | 0      | 0       | 4       | 0       | 0       | 0       | 0   |
| 0      | 0      | 0       | 172     | 64      | 0       | 0       | 0   |
| 1      | 0      | 0       | 160     | 0       | 0       | 0       | 0   |
| 2      | 0      | 7       | 158     | 65      | 0       | 0       | 53  |
| 0      | 0      | 0       | 92      | 29      | 0       | 0       | 76  |
| 0      | 0      | 0       | 33      | 12      | 0       | 0       | 0   |
| 2      | 0      | 0       | 144     | 30      | 6       | 0       | 60  |



|   |    |    |     |     |     |     |
|---|----|----|-----|-----|-----|-----|
| 0 | 0  | 0  | 131 | 0   | 0   | 2   |
| 0 | 0  | 0  | 16  | 4   | 0   | 1   |
| 0 | 0  | 0  | 2   | 0   | 2   | 31  |
| 0 | 0  | 0  | 76  | 29  | 0   | 97  |
| 0 | 0  | 0  | 53  | 0   | 0   | 1   |
| 0 | 0  | 0  | 0   | 0   | 0   | 0   |
| 0 | 0  | 0  | 29  | 31  | 0   | 5   |
| 1 | 8  | 95 | 0   | 6   | 0   | 0   |
| 0 | 0  | 0  | 0   | 0   | 0   | 2   |
| 0 | 0  | 0  | 0   | 0   | 0   | 0   |
| 0 | 0  | 7  | 0   | 16  | 9   | 6   |
| 0 | 0  | 0  | 46  | 46  | 0   | 0   |
| 0 | 0  | 0  | 0   | 5   | 0   | 3   |
| 0 | 0  | 0  | 13  | 3   | 0   | 1   |
| 0 | 0  | 0  | 5   | 0   | 0   | 0   |
| 0 | 0  | 0  | 0   | 0   | 0   | 29  |
| 0 | 0  | 0  | 0   | 4   | 0   | 0   |
| 0 | 0  | 0  | 0   | 0   | 0   | 11  |
| 0 | 0  | 0  | 0   | 0   | 0   | 0   |
| 0 | 0  | 0  | 14  | 8   | 0   | 0   |
| 0 | 0  | 0  | 0   | 0   | 0   | 0   |
| 0 | 0  | 0  | 0   | 0   | 0   | 0   |
| 0 | 0  | 0  | 0   | 0   | 0   | 0   |
| 0 | 0  | 0  | 7   | 0   | 0   | 0   |
| 0 | 0  | 0  | 0   | 7   | 0   | 0   |
| 1 | 0  | 0  | 0   | 0   | 0   | 0   |
| 0 | 0  | 0  | 0   | 0   | 0   | 2   |
| 0 | 0  | 0  | 0   | 0   | 0   | 0   |
| 0 | 0  | 0  | 23  | 0   | 0   | 0   |
| 0 | 0  | 0  | 0   | 0   | 0   | 1   |
| 0 | 0  | 0  | 0   | 12  | 0   | 0   |
| 0 | 0  | 0  | 0   | 0   | 0   | 0   |
| 0 | 0  | 0  | 0   | 0   | 0   | 0   |
| 0 | 0  | 0  | 0   | 0   | 0   | 0   |
| 0 | 0  | 0  | 0   | 0   | 0   | 0   |
| 0 | 0  | 0  | 0   | 0   | 0   | 0   |
| 1 | 0  | 0  | 0   | 0   | 0   | 0   |
| 7 | 4  | 0  | 982 | 22  | 12  | 60  |
| 1 | 23 | 0  | 27  | 160 | 304 | 236 |
| 0 | 0  | 9  | 243 | 17  | 5   | 77  |
| 0 | 0  | 0  | 0   | 0   | 1   | 0   |
| 0 | 0  | 0  | 9   | 2   | 0   | 1   |
| 0 | 0  | 0  | 0   | 0   | 0   | 124 |
| 0 | 0  | 0  | 0   | 0   | 0   | 0   |
| 0 | 0  | 0  | 0   | 0   | 0   | 22  |
| 0 | 0  | 0  | 0   | 0   | 0   | 0   |

|    |    |    |    |     |    |     |
|----|----|----|----|-----|----|-----|
| 0  | 0  | 0  | 0  | 0   | 0  | 0   |
| 0  | 0  | 0  | 0  | 0   | 0  | 0   |
| 0  | 0  | 0  | 0  | 0   | 0  | 0   |
| 0  | 0  | 0  | 1  | 0   | 0  | 0   |
| 0  | 0  | 0  | 0  | 0   | 0  | 0   |
| 8  | 19 | 0  | 4  | 129 | 0  | 8   |
| 0  | 0  | 0  | 0  | 1   | 0  | 0   |
| 0  | 0  | 0  | 0  | 0   | 0  | 0   |
| 0  | 0  | 0  | 0  | 0   | 0  | 0   |
| 0  | 0  | 0  | 0  | 0   | 0  | 0   |
| 0  | 0  | 0  | 0  | 0   | 0  | 0   |
| 0  | 0  | 0  | 0  | 0   | 0  | 0   |
| 0  | 0  | 0  | 0  | 0   | 0  | 0   |
| 0  | 0  | 0  | 0  | 0   | 0  | 26  |
| 0  | 0  | 0  | 0  | 0   | 0  | 0   |
| 0  | 0  | 38 | 1  | 0   | 17 | 0   |
| 0  | 0  | 0  | 88 | 14  | 0  | 1   |
| 4  | 0  | 0  | 0  | 0   | 0  | 0   |
| 5  | 0  | 0  | 0  | 0   | 0  | 0   |
| 0  | 0  | 25 | 8  | 0   | 5  | 4   |
| 10 | 0  | 0  | 0  | 0   | 0  | 0   |
| 0  | 0  | 0  | 0  | 0   | 0  | 0   |
| 0  | 0  | 0  | 0  | 2   | 0  | 27  |
| 0  | 0  | 0  | 70 | 0   | 0  | 27  |
| 0  | 0  | 0  | 0  | 0   | 0  | 13  |
| 4  | 0  | 5  | 9  | 0   | 0  | 0   |
| 0  | 0  | 26 | 0  | 0   | 0  | 9   |
| 15 | 0  | 3  | 0  | 0   | 0  | 28  |
| 6  | 0  | 2  | 3  | 2   | 0  | 23  |
| 0  | 0  | 0  | 0  | 0   | 0  | 0   |
| 0  | 0  | 0  | 0  | 0   | 0  | 0   |
| 0  | 0  | 0  | 0  | 0   | 0  | 0   |
| 0  | 0  | 0  | 8  | 0   | 0  | 172 |
| 0  | 0  | 0  | 10 | 0   | 0  | 3   |
| 0  | 0  | 5  | 28 | 0   | 0  | 57  |
| 0  | 0  | 0  | 53 | 0   | 0  | 14  |
| 0  | 0  | 8  | 2  | 0   | 0  | 0   |
| 0  | 0  | 0  | 4  | 0   | 0  | 0   |
| 0  | 0  | 0  | 0  | 0   | 0  | 0   |
| 0  | 0  | 0  | 0  | 0   | 0  | 40  |
| 0  | 0  | 0  | 0  | 6   | 0  | 0   |
| 0  | 0  | 2  | 22 | 0   | 0  | 0   |
| 0  | 0  | 0  | 8  | 2   | 0  | 5   |
| 0  | 0  | 0  | 0  | 0   | 0  | 0   |
| 30 | 1  | 0  | 0  | 0   | 1  | 0   |
| 0  | 0  | 0  | 0  | 0   | 0  | 0   |
| 0  | 0  | 0  | 0  | 0   | 0  | 39  |
| 0  | 0  | 0  | 0  | 0   | 0  | 0   |

|    |    |     |     |      |      |      |
|----|----|-----|-----|------|------|------|
| 0  | 0  | 0   | 2   | 0    | 0    | 0    |
| 0  | 0  | 0   | 0   | 0    | 0    | 4    |
| 0  | 0  | 1   | 139 | 768  | 0    | 99   |
| 0  | 0  | 0   | 0   | 0    | 0    | 32   |
| 0  | 0  | 4   | 0   | 0    | 0    | 0    |
| 0  | 0  | 0   | 0   | 0    | 0    | 17   |
| 0  | 0  | 0   | 0   | 0    | 0    | 0    |
| 0  | 0  | 0   | 0   | 0    | 0    | 0    |
| 0  | 0  | 0   | 0   | 0    | 0    | 3    |
| 0  | 0  | 0   | 0   | 0    | 0    | 0    |
| 0  | 0  | 0   | 28  | 19   | 0    | 27   |
| 0  | 0  | 0   | 0   | 0    | 0    | 0    |
| 10 | 0  | 26  | 377 | 71   | 0    | 35   |
| 0  | 0  | 0   | 0   | 1    | 0    | 0    |
| 0  | 0  | 0   | 251 | 51   | 0    | 16   |
| 0  | 0  | 0   | 3   | 0    | 0    | 0    |
| 0  | 0  | 0   | 137 | 0    | 0    | 0    |
| 0  | 0  | 0   | 43  | 12   | 0    | 10   |
| 0  | 0  | 0   | 0   | 0    | 0    | 0    |
| 0  | 0  | 0   | 3   | 0    | 0    | 2    |
| 0  | 0  | 0   | 8   | 0    | 0    | 0    |
| 0  | 0  | 0   | 0   | 0    | 0    | 0    |
| 0  | 0  | 0   | 0   | 0    | 0    | 0    |
| 0  | 0  | 0   | 0   | 0    | 0    | 0    |
| 0  | 0  | 0   | 2   | 4    | 0    | 0    |
| 0  | 0  | 0   | 0   | 0    | 0    | 0    |
| 0  | 0  | 0   | 0   | 0    | 0    | 0    |
| 0  | 0  | 0   | 0   | 0    | 0    | 0    |
| 0  | 0  | 0   | 0   | 0    | 0    | 0    |
| 0  | 0  | 0   | 0   | 0    | 0    | 0    |
| 0  | 0  | 0   | 0   | 0    | 0    | 0    |
| 0  | 0  | 0   | 0   | 0    | 0    | 0    |
| 0  | 0  | 0   | 0   | 0    | 0    | 0    |
| 0  | 0  | 0   | 0   | 0    | 0    | 0    |
| 0  | 0  | 7   | 5   | 0    | 0    | 0    |
| 0  | 5  | 0   | 0   | 0    | 0    | 2    |
| 0  | 0  | 0   | 0   | 0    | 0    | 0    |
| 0  | 0  | 0   | 0   | 2    | 0    | 13   |
| 0  | 0  | 0   | 8   | 2    | 0    | 0    |
| 0  | 0  | 0   | 6   | 0    | 0    | 0    |
| 0  | 0  | 0   | 0   | 0    | 0    | 0    |
| 0  | 0  | 0   | 0   | 0    | 0    | 0    |
| 0  | 0  | 0   | 0   | 0    | 0    | 0    |
| 0  | 0  | 100 | 0   | 88   | 0    | 0    |
| 0  | 0  | 7   | 0   | 2    | 0    | 0    |
| 0  | 0  | 0   | 0   | 0    | 0    | 0    |
| 0  | 0  | 0   | 0   | 0    | 0    | 0    |
| 4  | 17 | 3   | 4   | 2902 | 3122 | 3098 |
| 0  | 5  | 3   | 1   | 3    | 1    | 12   |
| 5  | 4  | 0   | 3   | 0    | 1    | 6    |
| 2  | 0  | 0   | 0   | 0    | 0    | 0    |
| 1  | 0  | 1   | 0   | 0    | 1    | 7    |
| 2  | 4  | 0   | 0   | 0    | 0    | 1    |

|   |    |    |     |      |       |      |
|---|----|----|-----|------|-------|------|
| 0 | 0  | 0  | 0   | 29   | 8     | 2    |
| 0 | 0  | 0  | 0   | 0    | 0     | 0    |
| 0 | 0  | 0  | 0   | 4    | 4     | 0    |
| 0 | 0  | 0  | 0   | 0    | 2     | 0    |
| 0 | 0  | 0  | 0   | 0    | 0     | 0    |
| 0 | 0  | 0  | 10  | 0    | 0     | 12   |
| 0 | 0  | 0  | 0   | 0    | 0     | 0    |
| 0 | 0  | 0  | 0   | 0    | 0     | 0    |
| 0 | 0  | 0  | 0   | 1    | 0     | 3    |
| 0 | 0  | 0  | 0   | 0    | 0     | 0    |
| 0 | 0  | 0  | 0   | 0    | 0     | 0    |
| 0 | 0  | 0  | 0   | 0    | 0     | 0    |
| 0 | 0  | 0  | 0   | 0    | 0     | 0    |
| 0 | 0  | 0  | 2   | 3    | 21    | 10   |
| 0 | 0  | 0  | 0   | 0    | 0     | 0    |
| 0 | 0  | 0  | 0   | 0    | 0     | 0    |
| 0 | 0  | 0  | 0   | 0    | 0     | 0    |
| 0 | 0  | 0  | 1   | 2    | 0     | 0    |
| 0 | 0  | 0  | 0   | 0    | 7     | 2    |
| 0 | 0  | 0  | 0   | 2    | 0     | 4    |
| 0 | 0  | 0  | 2   | 0    | 0     | 0    |
| 0 | 0  | 0  | 1   | 3    | 0     | 0    |
| 0 | 0  | 0  | 0   | 1    | 24    | 0    |
| 9 | 30 | 11 | 117 | 9534 | 14855 | 8526 |
| 3 | 5  | 29 | 1   | 21   | 46    | 7    |
| 0 | 0  | 0  | 0   | 1    | 2     | 0    |
| 0 | 0  | 0  | 0   | 0    | 0     | 0    |
| 0 | 0  | 0  | 1   | 32   | 83    | 82   |
| 0 | 2  | 0  | 0   | 0    | 0     | 0    |
| 0 | 0  | 0  | 11  | 7    | 14    | 2    |
| 0 | 0  | 0  | 0   | 0    | 0     | 0    |
| 0 | 0  | 0  | 0   | 1    | 4     | 1    |
| 0 | 0  | 0  | 0   | 0    | 0     | 0    |
| 0 | 0  | 0  | 0   | 5    | 1     | 1    |
| 0 | 0  | 0  | 0   | 2    | 2     | 3    |
| 0 | 0  | 0  | 12  | 1    | 0     | 1    |
| 4 | 7  | 41 | 65  | 514  | 1435  | 468  |
| 1 | 1  | 14 | 4   | 247  | 145   | 52   |
| 0 | 0  | 12 | 10  | 11   | 1     | 9    |
| 0 | 0  | 8  | 2   | 115  | 54    | 12   |
| 0 | 0  | 0  | 7   | 24   | 3     | 18   |
| 0 | 0  | 2  | 0   | 0    | 0     | 0    |
| 0 | 0  | 0  | 0   | 0    | 0     | 0    |
| 1 | 0  | 0  | 0   | 0    | 0     | 0    |
| 0 | 0  | 0  | 0   | 36   | 40    | 56   |
| 0 | 0  | 1  | 0   | 37   | 0     | 3    |
| 0 | 0  | 0  | 0   | 0    | 0     | 0    |
| 0 | 1  | 0  | 0   | 0    | 0     | 0    |

|    |    |    |     |    |    |     |
|----|----|----|-----|----|----|-----|
| 0  | 0  | 0  | 0   | 0  | 0  | 1   |
| 0  | 0  | 0  | 0   | 0  | 1  | 7   |
| 0  | 0  | 32 | 2   | 9  | 94 | 1   |
| 1  | 0  | 0  | 1   | 1  | 0  | 1   |
| 0  | 0  | 0  | 0   | 64 | 0  | 0   |
| 0  | 0  | 0  | 0   | 0  | 0  | 0   |
| 1  | 0  | 0  | 0   | 0  | 0  | 0   |
| 0  | 0  | 0  | 0   | 0  | 1  | 4   |
| 0  | 0  | 0  | 0   | 0  | 0  | 3   |
| 0  | 0  | 0  | 0   | 0  | 0  | 1   |
| 0  | 0  | 0  | 0   | 0  | 0  | 2   |
| 0  | 3  | 0  | 0   | 0  | 0  | 7   |
| 0  | 0  | 0  | 0   | 0  | 0  | 2   |
| 0  | 0  | 0  | 0   | 0  | 0  | 0   |
| 0  | 0  | 0  | 0   | 0  | 0  | 2   |
| 0  | 0  | 0  | 0   | 0  | 0  | 0   |
| 0  | 0  | 0  | 1   | 0  | 0  | 0   |
| 1  | 0  | 25 | 3   | 0  | 0  | 0   |
| 0  | 0  | 0  | 0   | 0  | 0  | 0   |
| 0  | 36 | 0  | 0   | 0  | 0  | 1   |
| 0  | 0  | 0  | 0   | 1  | 20 | 0   |
| 1  | 27 | 3  | 27  | 1  | 5  | 5   |
| 0  | 0  | 0  | 0   | 0  | 0  | 0   |
| 34 | 0  | 1  | 428 | 59 | 4  | 99  |
| 0  | 0  | 1  | 0   | 0  | 0  | 0   |
| 0  | 0  | 0  | 13  | 0  | 0  | 0   |
| 0  | 0  | 0  | 1   | 1  | 0  | 0   |
| 0  | 0  | 0  | 0   | 0  | 0  | 0   |
| 0  | 0  | 0  | 2   | 2  | 0  | 0   |
| 0  | 0  | 0  | 3   | 0  | 0  | 0   |
| 0  | 0  | 0  | 0   | 0  | 0  | 0   |
| 0  | 0  | 0  | 0   | 0  | 0  | 0   |
| 0  | 0  | 0  | 15  | 6  | 0  | 4   |
| 0  | 0  | 0  | 46  | 4  | 0  | 0   |
| 0  | 0  | 0  | 0   | 0  | 0  | 0   |
| 0  | 0  | 0  | 0   | 0  | 0  | 4   |
| 0  | 0  | 0  | 0   | 0  | 65 | 0   |
| 0  | 0  | 0  | 4   | 0  | 0  | 226 |
| 0  | 0  | 0  | 57  | 0  | 0  | 17  |
| 0  | 1  | 0  | 0   | 2  | 0  | 17  |
| 0  | 0  | 0  | 0   | 0  | 0  | 8   |
| 0  | 0  | 0  | 0   | 0  | 0  | 27  |
| 0  | 0  | 0  | 0   | 0  | 0  | 0   |
| 0  | 0  | 0  | 0   | 0  | 0  | 0   |
| 0  | 0  | 0  | 3   | 0  | 0  | 2   |
| 0  | 0  | 0  | 0   | 0  | 0  | 0   |
| 0  | 0  | 0  | 23  | 0  | 0  | 0   |
| 0  | 0  | 0  | 0   | 0  | 0  | 54  |

|     |      |     |      |      |     |      |
|-----|------|-----|------|------|-----|------|
| 0   | 0    | 0   | 4    | 0    | 0   | 7    |
| 0   | 0    | 0   | 1    | 0    | 0   | 1    |
| 0   | 41   | 0   | 0    | 1665 | 1   | 0    |
| 1   | 0    | 65  | 63   | 493  | 856 | 25   |
| 0   | 0    | 0   | 1    | 0    | 0   | 0    |
| 0   | 0    | 0   | 4    | 0    | 0   | 496  |
| 4   | 24   | 26  | 161  | 2    | 24  | 30   |
| 0   | 0    | 0   | 0    | 0    | 0   | 8    |
| 0   | 0    | 0   | 0    | 0    | 0   | 0    |
| 0   | 0    | 0   | 0    | 0    | 0   | 0    |
| 0   | 0    | 0   | 0    | 0    | 0   | 0    |
| 948 | 1012 | 863 | 5967 | 3948 | 362 | 4998 |
| 0   | 0    | 0   | 63   | 122  | 11  | 210  |
| 3   | 6    | 4   | 196  | 412  | 0   | 22   |
| 0   | 0    | 0   | 154  | 20   | 0   | 3    |
| 7   | 24   | 0   | 139  | 152  | 0   | 61   |
| 15  | 1    | 2   | 174  | 119  | 2   | 80   |
| 0   | 0    | 4   | 111  | 28   | 1   | 42   |
| 61  | 5    | 0   | 4    | 0    | 0   | 0    |
| 0   | 0    | 0   | 6    | 54   | 0   | 3    |
| 0   | 1    | 3   | 436  | 3    | 0   | 56   |
| 9   | 0    | 106 | 657  | 14   | 1   | 15   |
| 0   | 0    | 0   | 0    | 213  | 10  | 66   |
| 8   | 0    | 0   | 123  | 0    | 0   | 0    |
| 0   | 0    | 0   | 303  | 18   | 0   | 78   |
| 0   | 0    | 0   | 0    | 0    | 0   | 713  |
| 0   | 0    | 0   | 6    | 0    | 9   | 2    |
| 0   | 0    | 0   | 631  | 6    | 0   | 35   |
| 2   | 0    | 0   | 0    | 0    | 0   | 0    |
| 0   | 0    | 1   | 257  | 82   | 1   | 42   |
| 0   | 0    | 0   | 48   | 162  | 0   | 2    |
| 0   | 0    | 0   | 12   | 10   | 0   | 0    |
| 0   | 0    | 0   | 0    | 0    | 0   | 0    |
| 0   | 0    | 0   | 0    | 6    | 0   | 0    |
| 0   | 0    | 0   | 0    | 0    | 4   | 4    |
| 0   | 0    | 0   | 0    | 0    | 0   | 0    |
| 1   | 11   | 69  | 151  | 87   | 29  | 179  |
| 0   | 0    | 0   | 0    | 0    | 0   | 201  |
| 0   | 0    | 0   | 9    | 0    | 0   | 118  |
| 0   | 0    | 0   | 68   | 24   | 0   | 0    |
| 0   | 0    | 0   | 0    | 0    | 0   | 0    |
| 0   | 0    | 0   | 0    | 10   | 0   | 20   |
| 4   | 0    | 0   | 13   | 4    | 0   | 20   |
| 0   | 0    | 0   | 0    | 13   | 0   | 22   |
| 0   | 0    | 0   | 3    | 18   | 0   | 94   |
| 0   | 0    | 0   | 0    | 5    | 0   | 2    |
| 0   | 0    | 0   | 0    | 0    | 0   | 0    |
| 0   | 0    | 0   | 0    | 0    | 0   | 0    |

|    |    |   |    |    |   |    |
|----|----|---|----|----|---|----|
| 0  | 1  | 0 | 0  | 0  | 0 | 10 |
| 0  | 0  | 1 | 0  | 1  | 0 | 6  |
| 0  | 0  | 0 | 0  | 0  | 0 | 10 |
| 10 | 2  | 0 | 0  | 0  | 0 | 0  |
| 0  | 0  | 3 | 77 | 0  | 0 | 0  |
| 0  | 0  | 0 | 0  | 0  | 0 | 0  |
| 0  | 0  | 0 | 10 | 0  | 0 | 0  |
| 0  | 0  | 0 | 0  | 0  | 0 | 21 |
| 0  | 0  | 0 | 17 | 0  | 0 | 9  |
| 0  | 0  | 0 | 0  | 0  | 0 | 1  |
| 0  | 0  | 0 | 0  | 0  | 0 | 43 |
| 0  | 0  | 0 | 0  | 0  | 0 | 0  |
| 0  | 0  | 1 | 0  | 1  | 0 | 1  |
| 0  | 0  | 0 | 3  | 0  | 0 | 28 |
| 0  | 0  | 0 | 2  | 3  | 0 | 2  |
| 0  | 0  | 0 | 26 | 0  | 0 | 0  |
| 0  | 0  | 0 | 3  | 33 | 0 | 0  |
| 0  | 0  | 0 | 9  | 0  | 0 | 5  |
| 27 | 12 | 0 | 0  | 0  | 0 | 1  |
| 0  | 0  | 0 | 0  | 0  | 0 | 0  |
| 0  | 0  | 0 | 22 | 1  | 0 | 0  |
| 1  | 0  | 0 | 12 | 8  | 0 | 31 |
| 0  | 0  | 0 | 0  | 0  | 0 | 13 |
| 0  | 0  | 0 | 0  | 17 | 0 | 6  |
| 0  | 0  | 0 | 1  | 0  | 0 | 0  |
| 0  | 0  | 0 | 1  | 0  | 0 | 0  |
| 0  | 0  | 0 | 0  | 0  | 0 | 0  |
| 0  | 0  | 0 | 0  | 0  | 0 | 0  |
| 0  | 0  | 0 | 3  | 7  | 0 | 0  |
| 0  | 0  | 0 | 2  | 0  | 0 | 0  |
| 0  | 0  | 0 | 25 | 2  | 0 | 3  |
| 0  | 0  | 2 | 0  | 0  | 2 | 7  |
| 0  | 1  | 0 | 7  | 3  | 0 | 2  |
| 0  | 2  | 7 | 3  | 2  | 6 | 10 |
| 0  | 0  | 0 | 10 | 0  | 0 | 4  |
| 0  | 0  | 0 | 41 | 0  | 0 | 22 |
| 0  | 0  | 0 | 2  | 26 | 0 | 1  |
| 0  | 0  | 0 | 0  | 0  | 0 | 0  |
| 0  | 0  | 0 | 5  | 0  | 0 | 0  |
| 0  | 0  | 0 | 0  | 0  | 0 | 1  |
| 0  | 0  | 0 | 0  | 1  | 0 | 0  |
| 0  | 0  | 0 | 0  | 0  | 0 | 0  |
| 0  | 0  | 0 | 0  | 0  | 0 | 3  |
| 0  | 0  | 0 | 0  | 0  | 0 | 0  |
| 0  | 0  | 0 | 0  | 0  | 0 | 1  |
| 0  | 0  | 0 | 0  | 0  | 0 | 5  |
| 0  | 0  | 0 | 1  | 0  | 0 | 0  |
| 0  | 0  | 0 | 0  | 0  | 0 | 1  |

|   |    |    |     |     |   |     |
|---|----|----|-----|-----|---|-----|
| 0 | 0  | 0  | 0   | 1   | 0 | 5   |
| 0 | 0  | 1  | 0   | 0   | 0 | 2   |
| 0 | 0  | 0  | 0   | 0   | 0 | 5   |
| 0 | 0  | 1  | 0   | 0   | 0 | 0   |
| 0 | 0  | 0  | 1   | 1   | 0 | 0   |
| 0 | 0  | 0  | 0   | 0   | 0 | 0   |
| 0 | 0  | 0  | 0   | 0   | 0 | 2   |
| 0 | 0  | 0  | 1   | 0   | 1 | 2   |
| 0 | 0  | 0  | 0   | 0   | 0 | 0   |
| 0 | 0  | 1  | 2   | 3   | 3 | 4   |
| 0 | 0  | 0  | 0   | 0   | 0 | 0   |
| 0 | 0  | 0  | 3   | 0   | 0 | 0   |
| 0 | 0  | 0  | 0   | 0   | 0 | 0   |
| 0 | 0  | 0  | 0   | 0   | 0 | 0   |
| 0 | 0  | 0  | 0   | 0   | 0 | 0   |
| 0 | 0  | 0  | 0   | 0   | 0 | 0   |
| 0 | 0  | 0  | 0   | 0   | 0 | 4   |
| 0 | 0  | 0  | 0   | 0   | 0 | 0   |
| 0 | 0  | 0  | 0   | 1   | 0 | 0   |
| 0 | 0  | 0  | 0   | 0   | 0 | 0   |
| 0 | 0  | 0  | 0   | 0   | 0 | 0   |
| 0 | 0  | 0  | 0   | 0   | 0 | 0   |
| 0 | 0  | 0  | 0   | 0   | 0 | 0   |
| 0 | 0  | 0  | 0   | 0   | 0 | 0   |
| 0 | 0  | 0  | 0   | 0   | 0 | 0   |
| 0 | 0  | 0  | 0   | 0   | 0 | 0   |
| 0 | 0  | 0  | 0   | 0   | 0 | 0   |
| 0 | 0  | 1  | 0   | 1   | 0 | 0   |
| 0 | 0  | 0  | 0   | 0   | 0 | 0   |
| 0 | 0  | 0  | 0   | 0   | 0 | 0   |
| 0 | 0  | 0  | 0   | 0   | 0 | 0   |
| 0 | 0  | 0  | 0   | 0   | 0 | 1   |
| 0 | 0  | 0  | 0   | 0   | 0 | 0   |
| 0 | 0  | 87 | 148 | 3   | 0 | 3   |
| 0 | 0  | 0  | 264 | 182 | 0 | 1   |
| 0 | 0  | 0  | 81  | 0   | 0 | 0   |
| 0 | 0  | 0  | 0   | 0   | 0 | 14  |
| 0 | 0  | 0  | 0   | 0   | 0 | 3   |
| 0 | 0  | 0  | 0   | 0   | 0 | 0   |
| 0 | 0  | 0  | 533 | 10  | 0 | 53  |
| 0 | 0  | 0  | 365 | 1   | 4 | 1   |
| 1 | 0  | 0  | 452 | 0   | 0 | 0   |
| 0 | 0  | 2  | 590 | 16  | 0 | 262 |
| 0 | 0  | 0  | 53  | 0   | 0 | 0   |
| 0 | 0  | 0  | 4   | 0   | 0 | 0   |
| 0 | 0  | 0  | 15  | 0   | 0 | 0   |
| 0 | 0  | 1  | 14  | 0   | 0 | 0   |
| 0 | 0  | 0  | 8   | 3   | 0 | 10  |
| 0 | 0  | 0  | 0   | 0   | 0 | 0   |
| 0 | 0  | 0  | 0   | 1   | 0 | 3   |
| 0 | 0  | 0  | 0   | 0   | 0 | 3   |
| 0 | 16 | 40 | 0   | 0   | 1 | 2   |



|    |     |    |     |     |    |     |
|----|-----|----|-----|-----|----|-----|
| 0  | 0   | 0  | 79  | 87  | 0  | 62  |
| 0  | 0   | 0  | 19  | 0   | 0  | 31  |
| 0  | 0   | 0  | 23  | 0   | 0  | 6   |
| 0  | 0   | 1  | 87  | 7   | 0  | 5   |
| 0  | 0   | 0  | 19  | 0   | 0  | 0   |
| 0  | 0   | 0  | 0   | 1   | 0  | 0   |
| 40 | 458 | 93 | 14  | 17  | 7  | 9   |
| 1  | 0   | 0  | 35  | 54  | 0  | 49  |
| 3  | 1   | 0  | 623 | 197 | 11 | 61  |
| 0  | 0   | 0  | 304 | 2   | 0  | 6   |
| 0  | 0   | 0  | 43  | 1   | 0  | 1   |
| 0  | 0   | 0  | 3   | 0   | 0  | 6   |
| 0  | 0   | 0  | 0   | 0   | 0  | 2   |
| 0  | 0   | 0  | 0   | 0   | 0  | 0   |
| 0  | 0   | 0  | 0   | 0   | 0  | 0   |
| 0  | 0   | 0  | 0   | 0   | 0  | 0   |
| 0  | 0   | 0  | 1   | 0   | 0  | 0   |
| 0  | 0   | 0  | 3   | 0   | 0  | 0   |
| 0  | 0   | 0  | 653 | 17  | 0  | 2   |
| 0  | 0   | 0  | 7   | 5   | 0  | 0   |
| 0  | 0   | 0  | 0   | 0   | 0  | 1   |
| 2  | 0   | 0  | 25  | 0   | 0  | 127 |
| 0  | 0   | 0  | 37  | 25  | 0  | 0   |
| 0  | 0   | 0  | 0   | 0   | 0  | 59  |
| 0  | 0   | 0  | 0   | 0   | 0  | 8   |
| 0  | 0   | 0  | 0   | 0   | 0  | 0   |
| 4  | 1   | 3  | 0   | 3   | 0  | 3   |
| 0  | 0   | 0  | 0   | 0   | 0  | 0   |
| 0  | 0   | 0  | 0   | 0   | 0  | 0   |
| 0  | 0   | 0  | 1   | 3   | 0  | 0   |
| 0  | 0   | 0  | 0   | 0   | 0  | 0   |
| 0  | 0   | 0  | 0   | 0   | 0  | 0   |
| 0  | 0   | 0  | 1   | 0   | 0  | 26  |
| 0  | 0   | 43 | 0   | 0   | 0  | 0   |
| 3  | 0   | 0  | 0   | 9   | 2  | 9   |
| 0  | 0   | 0  | 0   | 0   | 0  | 1   |
| 0  | 1   | 0  | 0   | 0   | 0  | 0   |
| 0  | 0   | 0  | 0   | 0   | 0  | 0   |
| 0  | 0   | 0  | 0   | 2   | 1  | 0   |
| 0  | 0   | 0  | 0   | 1   | 4  | 0   |
| 0  | 0   | 0  | 0   | 9   | 0  | 12  |
| 0  | 0   | 0  | 0   | 0   | 0  | 0   |
| 0  | 0   | 0  | 44  | 36  | 0  | 49  |
| 0  | 0   | 0  | 8   | 0   | 0  | 0   |
| 0  | 0   | 0  | 0   | 0   | 0  | 0   |
| 0  | 0   | 0  | 0   | 0   | 0  | 0   |
| 0  | 0   | 0  | 0   | 0   | 0  | 0   |
| 0  | 0   | 0  | 0   | 0   | 0  | 0   |

|     |     |      |      |      |      |      |
|-----|-----|------|------|------|------|------|
| 1   | 0   | 0    | 0    | 2    | 5    | 0    |
| 0   | 0   | 0    | 0    | 0    | 0    | 0    |
| 15  | 25  | 35   | 10   | 27   | 63   | 403  |
| 0   | 0   | 1    | 0    | 2    | 1    | 0    |
| 0   | 0   | 0    | 0    | 0    | 0    | 0    |
| 0   | 0   | 0    | 0    | 0    | 0    | 0    |
| 0   | 0   | 0    | 0    | 0    | 0    | 0    |
| 0   | 0   | 0    | 0    | 0    | 0    | 0    |
| 0   | 0   | 0    | 0    | 0    | 0    | 0    |
| 0   | 0   | 0    | 0    | 0    | 0    | 0    |
| 0   | 0   | 0    | 7    | 1    | 0    | 95   |
| 2   | 0   | 0    | 0    | 0    | 0    | 0    |
| 0   | 0   | 0    | 0    | 0    | 0    | 0    |
| 0   | 0   | 0    | 0    | 1    | 0    | 0    |
| 0   | 0   | 0    | 0    | 0    | 0    | 0    |
| 0   | 0   | 0    | 0    | 0    | 0    | 0    |
| 0   | 0   | 0    | 0    | 0    | 0    | 0    |
| 0   | 0   | 0    | 0    | 0    | 0    | 0    |
| 0   | 0   | 0    | 0    | 0    | 0    | 0    |
| 0   | 0   | 0    | 3    | 0    | 0    | 0    |
| 0   | 0   | 0    | 0    | 7    | 4    | 12   |
| 0   | 0   | 0    | 0    | 0    | 0    | 0    |
| 0   | 3   | 0    | 0    | 0    | 0    | 0    |
| 0   | 0   | 0    | 0    | 0    | 0    | 0    |
| 2   | 0   | 0    | 0    | 1    | 0    | 0    |
| 0   | 0   | 0    | 0    | 66   | 6    | 0    |
| 0   | 0   | 0    | 0    | 2    | 0    | 0    |
| 0   | 0   | 0    | 0    | 0    | 0    | 0    |
| 27  | 0   | 2    | 0    | 0    | 0    | 0    |
| 0   | 0   | 0    | 0    | 0    | 0    | 0    |
| 0   | 0   | 0    | 1    | 0    | 2    | 2    |
| 4   | 0   | 0    | 0    | 0    | 0    | 0    |
| 0   | 12  | 0    | 1    | 230  | 39   | 337  |
| 0   | 0   | 0    | 0    | 0    | 0    | 0    |
| 0   | 0   | 0    | 0    | 0    | 0    | 0    |
| 0   | 0   | 0    | 0    | 0    | 0    | 0    |
| 0   | 0   | 0    | 0    | 0    | 0    | 0    |
| 0   | 0   | 2    | 1    | 0    | 0    | 1    |
| 0   | 0   | 0    | 0    | 0    | 0    | 0    |
| 0   | 0   | 0    | 0    | 0    | 0    | 0    |
| 0   | 0   | 0    | 0    | 0    | 0    | 0    |
| 6   | 25  | 14   | 32   | 125  | 279  | 74   |
| 0   | 0   | 0    | 0    | 0    | 0    | 0    |
| 0   | 0   | 0    | 1    | 2    | 0    | 0    |
| 471 | 48  | 817  | 1311 | 1394 | 1439 | 2458 |
| 58  | 18  | 80   | 72   | 114  | 1    | 203  |
| 548 | 113 | 859  | 639  | 148  | 78   | 157  |
| 159 | 47  | 1999 | 1062 | 222  | 13   | 93   |
| 15  | 4   | 307  | 100  | 59   | 58   | 19   |

|    |   |     |     |     |     |     |
|----|---|-----|-----|-----|-----|-----|
| 0  | 0 | 16  | 24  | 6   | 18  | 102 |
| 12 | 1 | 165 | 112 | 312 | 133 | 323 |
| 2  | 1 | 28  | 6   | 41  | 4   | 65  |
| 0  | 0 | 2   | 0   | 2   | 0   | 8   |
| 0  | 0 | 2   | 43  | 129 | 43  | 16  |
| 0  | 0 | 3   | 35  | 1   | 0   | 9   |
| 0  | 0 | 17  | 2   | 9   | 20  | 2   |
| 6  | 0 | 3   | 17  | 148 | 0   | 7   |
| 6  | 5 | 3   | 15  | 18  | 35  | 13  |
| 14 | 0 | 0   | 0   | 0   | 0   | 27  |
| 54 | 2 | 0   | 11  | 13  | 0   | 10  |
| 0  | 0 | 6   | 26  | 15  | 0   | 10  |
| 12 | 0 | 0   | 0   | 0   | 0   | 2   |
| 0  | 0 | 0   | 16  | 8   | 6   | 1   |
| 7  | 0 | 70  | 6   | 0   | 0   | 3   |
| 20 | 1 | 7   | 4   | 0   | 0   | 2   |
| 0  | 0 | 0   | 4   | 4   | 0   | 1   |
| 30 | 0 | 8   | 55  | 18  | 0   | 7   |
| 3  | 0 | 4   | 0   | 0   | 0   | 0   |
| 5  | 0 | 1   | 6   | 0   | 1   | 11  |
| 0  | 0 | 3   | 0   | 0   | 0   | 4   |
| 5  | 0 | 27  | 0   | 0   | 0   | 2   |
| 0  | 0 | 0   | 0   | 0   | 0   | 0   |
| 0  | 0 | 0   | 0   | 0   | 0   | 0   |
| 0  | 0 | 0   | 16  | 0   | 0   | 0   |
| 10 | 0 | 7   | 0   | 0   | 0   | 4   |
| 3  | 1 | 0   | 1   | 54  | 0   | 0   |
| 0  | 0 | 0   | 0   | 0   | 0   | 0   |
| 0  | 0 | 0   | 2   | 0   | 0   | 8   |
| 0  | 0 | 0   | 0   | 0   | 0   | 0   |
| 0  | 0 | 0   | 8   | 0   | 2   | 0   |
| 0  | 0 | 0   | 0   | 0   | 0   | 0   |
| 0  | 0 | 0   | 0   | 0   | 0   | 1   |
| 0  | 0 | 1   | 9   | 0   | 0   | 0   |
| 0  | 0 | 0   | 0   | 0   | 0   | 0   |
| 9  | 0 | 0   | 0   | 0   | 0   | 1   |
| 0  | 0 | 0   | 0   | 0   | 0   | 0   |
| 0  | 1 | 0   | 1   | 0   | 0   | 0   |
| 0  | 0 | 0   | 0   | 0   | 0   | 0   |
| 0  | 0 | 0   | 0   | 0   | 0   | 0   |
| 0  | 0 | 0   | 1   | 0   | 0   | 0   |
| 0  | 0 | 0   | 5   | 0   | 0   | 0   |
| 0  | 0 | 0   | 6   | 0   | 0   | 4   |
| 0  | 0 | 0   | 15  | 0   | 0   | 0   |
| 0  | 0 | 0   | 0   | 0   | 0   | 0   |
| 0  | 0 | 0   | 0   | 0   | 0   | 0   |
| 0  | 0 | 1   | 0   | 0   | 0   | 0   |
| 0  | 0 | 0   | 0   | 0   | 0   | 0   |

|    |    |    |      |     |      |      |
|----|----|----|------|-----|------|------|
| 0  | 0  | 2  | 3    | 0   | 0    | 0    |
| 0  | 0  | 3  | 0    | 0   | 0    | 0    |
| 0  | 0  | 0  | 0    | 0   | 0    | 0    |
| 0  | 0  | 0  | 0    | 0   | 0    | 0    |
| 0  | 0  | 0  | 5    | 0   | 1    | 0    |
| 12 | 5  | 33 | 18   | 21  | 1    | 55   |
| 0  | 0  | 0  | 0    | 0   | 0    | 0    |
| 3  | 0  | 0  | 1661 | 279 | 0    | 1021 |
| 0  | 0  | 0  | 4    | 1   | 0    | 3    |
| 0  | 0  | 0  | 0    | 0   | 0    | 0    |
| 0  | 0  | 0  | 0    | 0   | 0    | 0    |
| 0  | 0  | 4  | 0    | 0   | 1    | 0    |
| 0  | 0  | 0  | 0    | 4   | 1    | 7    |
| 0  | 0  | 0  | 0    | 0   | 0    | 0    |
| 0  | 0  | 0  | 3    | 0   | 0    | 0    |
| 0  | 0  | 0  | 0    | 0   | 2    | 0    |
| 0  | 0  | 1  | 0    | 97  | 2660 | 16   |
| 0  | 0  | 1  | 0    | 0   | 11   | 30   |
| 0  | 0  | 0  | 0    | 0   | 0    | 0    |
| 0  | 0  | 4  | 0    | 0   | 1    | 0    |
| 0  | 0  | 5  | 0    | 0   | 49   | 0    |
| 0  | 0  | 0  | 2    | 0   | 0    | 11   |
| 0  | 0  | 0  | 0    | 0   | 0    | 0    |
| 0  | 0  | 0  | 0    | 0   | 0    | 0    |
| 0  | 0  | 0  | 0    | 0   | 0    | 0    |
| 0  | 0  | 0  | 0    | 0   | 0    | 7    |
| 0  | 0  | 0  | 0    | 0   | 0    | 0    |
| 0  | 0  | 0  | 0    | 0   | 0    | 0    |
| 0  | 0  | 0  | 0    | 0   | 0    | 0    |
| 0  | 0  | 0  | 3    | 0   | 0    | 0    |
| 7  | 0  | 0  | 1    | 0   | 0    | 14   |
| 0  | 1  | 11 | 2    | 4   | 0    | 6    |
| 0  | 0  | 0  | 0    | 33  | 1    | 0    |
| 0  | 0  | 0  | 0    | 0   | 0    | 0    |
| 0  | 0  | 0  | 0    | 0   | 0    | 0    |
| 0  | 0  | 0  | 0    | 0   | 0    | 0    |
| 1  | 1  | 1  | 23   | 78  | 0    | 0    |
| 93 | 53 | 43 | 66   | 2   | 22   | 11   |
| 0  | 0  | 0  | 0    | 0   | 0    | 0    |
| 1  | 0  | 0  | 0    | 4   | 1    | 5    |
| 0  | 0  | 0  | 0    | 0   | 0    | 0    |
| 0  | 0  | 0  | 0    | 0   | 0    | 0    |
| 0  | 0  | 0  | 0    | 0   | 0    | 0    |
| 0  | 0  | 0  | 0    | 0   | 0    | 0    |
| 1  | 0  | 0  | 0    | 0   | 1    | 0    |
| 0  | 0  | 0  | 0    | 0   | 0    | 5    |
| 0  | 0  | 0  | 0    | 0   | 0    | 0    |
| 0  | 0  | 0  | 0    | 0   | 0    | 0    |
| 0  | 0  | 0  | 1    | 0   | 0    | 0    |



|     |    |     |     |     |      |     |
|-----|----|-----|-----|-----|------|-----|
| 0   | 0  | 0   | 0   | 0   | 0    | 0   |
| 4   | 3  | 187 | 42  | 455 | 457  | 199 |
| 2   | 5  | 94  | 9   | 65  | 453  | 56  |
| 9   | 2  | 59  | 9   | 9   | 77   | 64  |
| 0   | 0  | 0   | 0   | 4   | 2    | 0   |
| 23  | 0  | 149 | 6   | 0   | 0    | 0   |
| 0   | 0  | 1   | 3   | 26  | 4    | 4   |
| 0   | 0  | 0   | 0   | 0   | 0    | 6   |
| 0   | 0  | 0   | 0   | 0   | 0    | 0   |
| 2   | 2  | 1   | 0   | 0   | 65   | 30  |
| 0   | 0  | 0   | 2   | 0   | 0    | 0   |
| 0   | 0  | 0   | 26  | 0   | 0    | 0   |
| 0   | 0  | 0   | 0   | 0   | 0    | 0   |
| 1   | 0  | 3   | 1   | 2   | 3    | 0   |
| 1   | 0  | 46  | 0   | 12  | 1    | 1   |
| 0   | 0  | 0   | 0   | 0   | 0    | 0   |
| 0   | 0  | 0   | 10  | 17  | 0    | 0   |
| 0   | 0  | 0   | 0   | 0   | 0    | 1   |
| 0   | 0  | 0   | 0   | 0   | 0    | 0   |
| 4   | 0  | 2   | 3   | 0   | 0    | 5   |
| 0   | 1  | 1   | 1   | 3   | 0    | 3   |
| 0   | 0  | 0   | 13  | 0   | 0    | 1   |
| 0   | 0  | 0   | 4   | 0   | 0    | 0   |
| 0   | 0  | 0   | 2   | 1   | 0    | 0   |
| 0   | 0  | 0   | 0   | 0   | 0    | 0   |
| 0   | 0  | 0   | 0   | 0   | 0    | 1   |
| 0   | 0  | 0   | 0   | 0   | 0    | 0   |
| 0   | 1  | 0   | 0   | 0   | 0    | 0   |
| 0   | 0  | 0   | 0   | 0   | 0    | 0   |
| 0   | 0  | 0   | 1   | 0   | 0    | 0   |
| 0   | 0  | 1   | 0   | 1   | 3    | 1   |
| 0   | 0  | 0   | 0   | 0   | 0    | 0   |
| 70  | 4  | 0   | 44  | 298 | 26   | 2   |
| 247 | 18 | 3   | 17  | 43  | 205  | 34  |
| 5   | 1  | 237 | 33  | 1   | 5    | 0   |
| 0   | 4  | 0   | 8   | 96  | 1303 | 10  |
| 1   | 0  | 4   | 10  | 528 | 1891 | 61  |
| 0   | 0  | 3   | 0   | 102 | 400  | 6   |
| 7   | 3  | 223 | 174 | 46  | 25   | 7   |
| 4   | 1  | 43  | 223 | 28  | 3    | 23  |
| 5   | 0  | 1   | 0   | 0   | 0    | 0   |
| 0   | 0  | 88  | 2   | 15  | 41   | 16  |
| 201 | 32 | 184 | 52  | 0   | 0    | 0   |
| 6   | 1  | 18  | 33  | 17  | 0    | 5   |
| 0   | 0  | 14  | 0   | 54  | 1    | 3   |
| 5   | 2  | 27  | 24  | 0   | 1    | 7   |
| 0   | 0  | 0   | 0   | 1   | 18   | 4   |
| 0   | 0  | 0   | 11  | 0   | 0    | 2   |

|    |    |   |    |    |     |    |
|----|----|---|----|----|-----|----|
| 0  | 0  | 0 | 0  | 0  | 0   | 0  |
| 0  | 0  | 0 | 0  | 0  | 0   | 0  |
| 0  | 0  | 0 | 0  | 0  | 0   | 0  |
| 0  | 0  | 0 | 0  | 0  | 0   | 0  |
| 0  | 0  | 0 | 0  | 0  | 0   | 0  |
| 0  | 0  | 0 | 0  | 0  | 0   | 0  |
| 0  | 0  | 0 | 0  | 0  | 0   | 0  |
| 0  | 0  | 0 | 0  | 0  | 0   | 0  |
| 0  | 0  | 0 | 0  | 0  | 0   | 0  |
| 0  | 0  | 0 | 0  | 0  | 0   | 0  |
| 0  | 0  | 0 | 0  | 0  | 0   | 0  |
| 0  | 0  | 2 | 0  | 2  | 23  | 0  |
| 0  | 0  | 0 | 0  | 0  | 0   | 0  |
| 0  | 0  | 0 | 0  | 0  | 0   | 0  |
| 0  | 0  | 0 | 0  | 1  | 0   | 2  |
| 0  | 0  | 0 | 3  | 0  | 0   | 0  |
| 0  | 0  | 0 | 0  | 0  | 0   | 0  |
| 0  | 0  | 0 | 0  | 0  | 0   | 0  |
| 0  | 0  | 0 | 0  | 0  | 0   | 0  |
| 0  | 0  | 0 | 0  | 0  | 0   | 0  |
| 0  | 0  | 0 | 0  | 0  | 0   | 0  |
| 0  | 0  | 0 | 0  | 0  | 0   | 0  |
| 0  | 0  | 0 | 0  | 0  | 0   | 0  |
| 0  | 0  | 0 | 0  | 0  | 0   | 0  |
| 0  | 0  | 0 | 0  | 0  | 0   | 0  |
| 0  | 0  | 0 | 0  | 0  | 0   | 1  |
| 0  | 0  | 0 | 0  | 0  | 0   | 0  |
| 0  | 0  | 0 | 0  | 0  | 0   | 0  |
| 0  | 0  | 0 | 0  | 3  | 0   | 4  |
| 0  | 0  | 0 | 1  | 0  | 0   | 0  |
| 0  | 0  | 0 | 9  | 0  | 0   | 0  |
| 2  | 15 | 1 | 6  | 57 | 171 | 5  |
| 0  | 2  | 0 | 0  | 10 | 47  | 11 |
| 0  | 1  | 0 | 0  | 7  | 34  | 1  |
| 0  | 0  | 0 | 0  | 4  | 20  | 5  |
| 0  | 0  | 0 | 0  | 0  | 4   | 5  |
| 0  | 0  | 0 | 0  | 5  | 8   | 0  |
| 0  | 0  | 0 | 0  | 0  | 0   | 1  |
| 0  | 0  | 0 | 0  | 2  | 3   | 1  |
| 0  | 0  | 0 | 0  | 1  | 4   | 0  |
| 0  | 0  | 0 | 0  | 0  | 6   | 0  |
| 0  | 0  | 0 | 0  | 4  | 7   | 1  |
| 0  | 0  | 0 | 0  | 0  | 0   | 0  |
| 22 | 1  | 0 | 0  | 0  | 0   | 0  |
| 0  | 0  | 2 | 38 | 51 | 0   | 78 |
| 0  | 0  | 0 | 0  | 0  | 0   | 0  |
| 0  | 1  | 0 | 1  | 0  | 0   | 0  |
| 0  | 0  | 0 | 0  | 0  | 0   | 0  |
| 0  | 0  | 0 | 0  | 0  | 0   | 0  |
| 0  | 0  | 0 | 0  | 0  | 0   | 0  |
| 0  | 0  | 0 | 0  | 0  | 0   | 0  |
| 0  | 0  | 0 | 0  | 1  | 0   | 0  |

|     |      |      |      |      |       |      |
|-----|------|------|------|------|-------|------|
| 461 | 1994 | 2030 | 4238 | 6923 | 26281 | 1647 |
| 0   | 1    | 35   | 12   | 86   | 42    | 31   |
| 32  | 0    | 0    | 0    | 0    | 0     | 0    |
| 0   | 0    | 0    | 0    | 0    | 0     | 0    |
| 2   | 0    | 0    | 0    | 1    | 2     | 0    |
| 2   | 0    | 0    | 0    | 0    | 7     | 0    |
| 0   | 0    | 0    | 0    | 0    | 0     | 0    |
| 0   | 0    | 0    | 0    | 0    | 0     | 0    |
| 0   | 0    | 0    | 1    | 0    | 0     | 0    |
| 0   | 0    | 0    | 0    | 0    | 0     | 0    |
| 0   | 0    | 1    | 0    | 0    | 0     | 0    |
| 0   | 0    | 0    | 0    | 0    | 0     | 0    |
| 0   | 9    | 0    | 6    | 449  | 1662  | 50   |
| 0   | 100  | 13   | 678  | 0    | 0     | 0    |
| 1   | 0    | 0    | 4    | 307  | 3976  | 11   |
| 0   | 0    | 0    | 0    | 0    | 0     | 0    |
| 0   | 0    | 0    | 0    | 0    | 0     | 0    |
| 0   | 0    | 0    | 0    | 9    | 0     | 0    |
| 0   | 0    | 0    | 0    | 0    | 0     | 0    |
| 21  | 5    | 292  | 34   | 3    | 4     | 25   |
| 1   | 0    | 7    | 4    | 0    | 6     | 1    |
| 0   | 0    | 0    | 0    | 5    | 50    | 0    |
| 0   | 0    | 1    | 1    | 0    | 0     | 0    |
| 0   | 0    | 0    | 1    | 0    | 2     | 0    |
| 4   | 5    | 15   | 52   | 260  | 714   | 109  |
| 0   | 0    | 0    | 0    | 0    | 0     | 0    |
| 0   | 0    | 0    | 7    | 0    | 0     | 0    |
| 665 | 65   | 0    | 16   | 0    | 33    | 5    |
| 0   | 0    | 67   | 3    | 10   | 92    | 11   |
| 91  | 31   | 1095 | 35   | 31   | 403   | 365  |
| 17  | 15   | 52   | 19   | 14   | 28    | 113  |
| 0   | 6    | 1    | 9    | 9    | 9     | 65   |
| 25  | 1    | 69   | 7    | 6    | 115   | 7    |
| 26  | 2    | 105  | 63   | 0    | 0     | 0    |
| 42  | 14   | 54   | 4    | 0    | 6     | 17   |
| 6   | 4    | 7    | 0    | 2    | 14    | 0    |
| 5   | 3    | 41   | 11   | 4    | 13    | 9    |
| 0   | 0    | 0    | 0    | 1    | 0     | 0    |
| 0   | 0    | 0    | 0    | 0    | 0     | 0    |
| 5   | 1    | 0    | 0    | 0    | 0     | 0    |
| 0   | 0    | 0    | 0    | 0    | 0     | 0    |
| 0   | 0    | 0    | 0    | 0    | 0     | 0    |
| 0   | 0    | 0    | 0    | 0    | 0     | 0    |
| 58  | 1    | 0    | 14   | 11   | 1     | 0    |
| 113 | 41   | 95   | 41   | 108  | 777   | 76   |
| 0   | 0    | 0    | 0    | 0    | 0     | 4    |
| 0   | 1    | 0    | 0    | 0    | 0     | 3    |
| 0   | 9    | 0    | 0    | 0    | 0     | 74   |



|     |     |     |     |      |       |     |
|-----|-----|-----|-----|------|-------|-----|
| 10  | 5   | 0   | 0   | 0    | 0     | 0   |
| 1   | 0   | 0   | 0   | 0    | 0     | 0   |
| 3   | 0   | 0   | 0   | 0    | 1     | 0   |
| 5   | 0   | 0   | 0   | 0    | 0     | 0   |
| 1   | 0   | 0   | 0   | 0    | 0     | 0   |
| 0   | 0   | 0   | 0   | 0    | 0     | 0   |
| 0   | 0   | 0   | 0   | 0    | 0     | 0   |
| 292 | 13  | 0   | 1   | 0    | 0     | 3   |
| 12  | 32  | 0   | 3   | 0    | 0     | 0   |
| 600 | 187 | 1   | 51  | 0    | 2     | 0   |
| 0   | 0   | 0   | 0   | 0    | 0     | 0   |
| 0   | 18  | 6   | 0   | 0    | 3     | 0   |
| 0   | 1   | 0   | 0   | 0    | 0     | 0   |
| 0   | 0   | 0   | 0   | 0    | 0     | 0   |
| 0   | 0   | 0   | 0   | 0    | 0     | 0   |
| 776 | 208 | 449 | 412 | 853  | 8789  | 324 |
| 113 | 116 | 18  | 72  | 153  | 12    | 5   |
| 0   | 0   | 14  | 9   | 51   | 528   | 10  |
| 0   | 1   | 5   | 0   | 0    | 0     | 0   |
| 0   | 0   | 0   | 0   | 0    | 11    | 1   |
| 0   | 0   | 0   | 0   | 1    | 4     | 0   |
| 0   | 0   | 0   | 0   | 2    | 18    | 1   |
| 0   | 0   | 0   | 1   | 1    | 18    | 0   |
| 0   | 0   | 1   | 0   | 0    | 12    | 0   |
| 0   | 0   | 3   | 3   | 1    | 8     | 1   |
| 0   | 0   | 4   | 3   | 25   | 201   | 2   |
| 0   | 0   | 0   | 0   | 0    | 0     | 0   |
| 0   | 0   | 0   | 0   | 0    | 0     | 0   |
| 16  | 7   | 8   | 11  | 21   | 66    | 11  |
| 1   | 1   | 0   | 7   | 546  | 17    | 30  |
| 6   | 17  | 34  | 54  | 449  | 129   | 8   |
| 4   | 5   | 0   | 0   | 109  | 320   | 2   |
| 0   | 16  | 16  | 6   | 46   | 110   | 359 |
| 0   | 0   | 0   | 0   | 0    | 0     | 0   |
| 0   | 1   | 0   | 0   | 0    | 0     | 0   |
| 0   | 0   | 0   | 0   | 0    | 0     | 0   |
| 0   | 0   | 0   | 0   | 1    | 0     | 1   |
| 0   | 0   | 0   | 0   | 0    | 0     | 6   |
| 16  | 99  | 358 | 875 | 3808 | 16407 | 239 |
| 5   | 132 | 5   | 48  | 3    | 23    | 7   |
| 1   | 53  | 1   | 40  | 0    | 1     | 0   |
| 0   | 32  | 1   | 37  | 0    | 0     | 0   |
| 19  | 66  | 2   | 100 | 3    | 7     | 1   |
| 0   | 0   | 0   | 0   | 0    | 0     | 0   |
| 0   | 0   | 0   | 0   | 0    | 0     | 0   |
| 0   | 1   | 0   | 1   | 0    | 0     | 0   |
| 0   | 1   | 0   | 0   | 0    | 0     | 0   |
| 0   | 0   | 0   | 0   | 0    | 0     | 0   |

|    |    |     |     |     |     |    |
|----|----|-----|-----|-----|-----|----|
| 0  | 0  | 0   | 0   | 0   | 0   | 0  |
| 0  | 0  | 0   | 0   | 0   | 0   | 0  |
| 0  | 0  | 0   | 0   | 0   | 0   | 0  |
| 0  | 0  | 0   | 0   | 0   | 0   | 0  |
| 0  | 0  | 0   | 0   | 0   | 0   | 0  |
| 0  | 0  | 0   | 0   | 0   | 5   | 0  |
| 0  | 0  | 0   | 0   | 0   | 0   | 0  |
| 0  | 0  | 0   | 0   | 0   | 0   | 0  |
| 0  | 0  | 0   | 0   | 0   | 0   | 0  |
| 0  | 0  | 0   | 2   | 0   | 4   | 1  |
| 0  | 0  | 0   | 0   | 0   | 0   | 0  |
| 0  | 0  | 0   | 0   | 0   | 0   | 0  |
| 0  | 0  | 0   | 0   | 0   | 0   | 0  |
| 1  | 0  | 0   | 0   | 0   | 0   | 0  |
| 5  | 0  | 0   | 0   | 0   | 0   | 0  |
| 7  | 0  | 3   | 0   | 0   | 0   | 0  |
| 8  | 0  | 0   | 17  | 85  | 243 | 5  |
| 3  | 0  | 0   | 0   | 0   | 3   | 0  |
| 35 | 9  | 46  | 12  | 17  | 118 | 2  |
| 0  | 4  | 0   | 0   | 0   | 0   | 0  |
| 0  | 1  | 0   | 0   | 0   | 0   | 2  |
| 0  | 0  | 0   | 0   | 0   | 0   | 0  |
| 0  | 0  | 0   | 0   | 0   | 0   | 0  |
| 0  | 0  | 0   | 0   | 0   | 0   | 0  |
| 1  | 14 | 147 | 285 | 123 | 11  | 75 |
| 5  | 80 | 14  | 30  | 71  | 0   | 2  |
| 0  | 0  | 1   | 2   | 3   | 0   | 0  |
| 0  | 0  | 0   | 0   | 6   | 41  | 47 |
| 0  | 0  | 0   | 3   | 8   | 0   | 0  |
| 0  | 0  | 0   | 240 | 2   | 0   | 9  |
| 5  | 6  | 16  | 14  | 4   | 0   | 3  |
| 0  | 0  | 0   | 0   | 2   | 1   | 0  |
| 0  | 0  | 0   | 0   | 0   | 0   | 0  |
| 0  | 0  | 0   | 0   | 0   | 0   | 12 |
| 0  | 0  | 0   | 0   | 0   | 0   | 0  |
| 0  | 0  | 0   | 0   | 0   | 0   | 3  |
| 0  | 0  | 0   | 0   | 0   | 0   | 0  |
| 0  | 0  | 0   | 1   | 3   | 0   | 0  |
| 0  | 0  | 0   | 0   | 0   | 0   | 0  |
| 0  | 0  | 0   | 0   | 0   | 0   | 0  |
| 0  | 0  | 0   | 0   | 0   | 0   | 0  |
| 41 | 0  | 0   | 0   | 2   | 0   | 0  |
| 35 | 1  | 156 | 23  | 57  | 27  | 39 |
| 0  | 12 | 0   | 0   | 0   | 3   | 11 |
| 0  | 0  | 0   | 13  | 0   | 0   | 0  |
| 7  | 0  | 1   | 0   | 0   | 0   | 0  |
| 3  | 0  | 0   | 0   | 0   | 0   | 0  |

|     |     |     |     |      |       |      |
|-----|-----|-----|-----|------|-------|------|
| 0   | 0   | 0   | 0   | 0    | 0     | 0    |
| 0   | 0   | 0   | 0   | 0    | 3     | 0    |
| 104 | 69  | 588 | 387 | 1514 | 1923  | 1322 |
| 62  | 3   | 64  | 18  | 299  | 13258 | 233  |
| 26  | 156 | 121 | 304 | 595  | 6     | 644  |
| 0   | 2   | 0   | 94  | 68   | 92    | 25   |
| 2   | 12  | 18  | 15  | 20   | 12    | 135  |
| 2   | 16  | 0   | 441 | 1826 | 32    | 71   |
| 0   | 0   | 0   | 64  | 1998 | 1     | 1    |
| 8   | 0   | 68  | 6   | 87   | 291   | 237  |
| 0   | 0   | 1   | 1   | 46   | 78    | 347  |
| 0   | 0   | 0   | 43  | 361  | 0     | 0    |
| 10  | 0   | 7   | 80  | 96   | 114   | 105  |
| 0   | 0   | 0   | 16  | 0    | 0     | 85   |
| 6   | 7   | 10  | 205 | 184  | 36    | 56   |
| 0   | 0   | 1   | 1   | 30   | 1     | 19   |
| 1   | 0   | 0   | 28  | 13   | 0     | 1    |
| 0   | 0   | 0   | 47  | 110  | 1     | 1    |
| 50  | 0   | 56  | 17  | 22   | 3     | 46   |
| 1   | 0   | 0   | 12  | 2    | 0     | 3    |
| 0   | 0   | 0   | 0   | 0    | 0     | 0    |
| 1   | 0   | 0   | 0   | 42   | 0     | 0    |
| 39  | 0   | 0   | 87  | 1    | 1     | 4    |
| 12  | 0   | 0   | 36  | 0    | 3     | 13   |
| 2   | 0   | 8   | 10  | 19   | 0     | 14   |
| 7   | 2   | 18  | 60  | 287  | 102   | 13   |
| 5   | 0   | 0   | 2   | 0    | 0     | 0    |
| 0   | 1   | 0   | 0   | 0    | 0     | 5    |
| 0   | 0   | 0   | 0   | 0    | 0     | 0    |
| 2   | 3   | 0   | 6   | 5    | 0     | 0    |
| 0   | 0   | 0   | 23  | 0    | 0     | 0    |
| 0   | 0   | 0   | 8   | 8    | 0     | 0    |
| 0   | 0   | 0   | 0   | 0    | 0     | 0    |
| 0   | 0   | 0   | 18  | 4    | 0     | 0    |
| 0   | 0   | 0   | 41  | 65   | 0     | 9    |
| 0   | 0   | 0   | 0   | 0    | 0     | 8    |
| 0   | 0   | 0   | 14  | 15   | 0     | 5    |
| 4   | 0   | 0   | 0   | 0    | 0     | 0    |
| 0   | 0   | 0   | 0   | 0    | 0     | 0    |
| 0   | 0   | 0   | 9   | 0    | 0     | 1    |
| 0   | 0   | 0   | 3   | 0    | 0     | 0    |
| 0   | 0   | 0   | 0   | 0    | 0     | 0    |
| 16  | 2   | 0   | 1   | 0    | 0     | 0    |
| 0   | 0   | 0   | 0   | 0    | 0     | 0    |
| 0   | 0   | 0   | 1   | 0    | 0     | 0    |
| 0   | 0   | 0   | 2   | 0    | 0     | 16   |
| 0   | 0   | 0   | 0   | 0    | 0     | 0    |
| 0   | 0   | 0   | 0   | 0    | 0     | 0    |

|   |   |    |   |    |     |    |
|---|---|----|---|----|-----|----|
| 0 | 0 | 0  | 0 | 4  | 7   | 9  |
| 0 | 0 | 0  | 4 | 0  | 0   | 3  |
| 0 | 0 | 2  | 0 | 0  | 1   | 0  |
| 5 | 0 | 0  | 0 | 0  | 0   | 1  |
| 0 | 0 | 0  | 0 | 0  | 0   | 0  |
| 0 | 0 | 0  | 0 | 0  | 0   | 0  |
| 0 | 0 | 0  | 0 | 0  | 0   | 0  |
| 0 | 0 | 0  | 0 | 0  | 0   | 1  |
| 0 | 0 | 2  | 2 | 15 | 19  | 2  |
| 0 | 0 | 0  | 0 | 0  | 0   | 0  |
| 0 | 0 | 0  | 0 | 0  | 0   | 0  |
| 0 | 0 | 0  | 0 | 0  | 0   | 4  |
| 0 | 0 | 0  | 0 | 0  | 0   | 4  |
| 0 | 0 | 0  | 0 | 0  | 0   | 2  |
| 0 | 0 | 0  | 0 | 0  | 0   | 0  |
| 0 | 0 | 0  | 2 | 0  | 0   | 19 |
| 0 | 0 | 0  | 3 | 0  | 0   | 0  |
| 0 | 0 | 0  | 0 | 0  | 0   | 0  |
| 0 | 0 | 0  | 3 | 0  | 0   | 0  |
| 0 | 0 | 0  | 0 | 0  | 0   | 0  |
| 0 | 0 | 0  | 0 | 0  | 0   | 6  |
| 0 | 0 | 0  | 0 | 0  | 0   | 0  |
| 0 | 0 | 0  | 0 | 0  | 0   | 5  |
| 0 | 0 | 0  | 0 | 0  | 0   | 17 |
| 0 | 0 | 0  | 0 | 0  | 0   | 3  |
| 0 | 0 | 0  | 1 | 0  | 0   | 2  |
| 0 | 0 | 0  | 0 | 0  | 0   | 0  |
| 0 | 0 | 0  | 0 | 0  | 0   | 1  |
| 0 | 0 | 0  | 0 | 0  | 0   | 0  |
| 0 | 0 | 0  | 0 | 0  | 10  | 0  |
| 0 | 0 | 0  | 0 | 0  | 0   | 0  |
| 0 | 0 | 0  | 0 | 0  | 0   | 0  |
| 0 | 0 | 0  | 0 | 0  | 0   | 4  |
| 0 | 0 | 0  | 0 | 0  | 4   | 0  |
| 0 | 0 | 1  | 0 | 0  | 3   | 0  |
| 0 | 0 | 0  | 0 | 0  | 0   | 0  |
| 0 | 0 | 0  | 0 | 0  | 0   | 3  |
| 0 | 0 | 0  | 0 | 0  | 0   | 0  |
| 0 | 0 | 0  | 0 | 0  | 0   | 0  |
| 0 | 0 | 0  | 0 | 0  | 0   | 1  |
| 0 | 0 | 1  | 0 | 3  | 2   | 1  |
| 0 | 0 | 0  | 0 | 0  | 0   | 0  |
| 0 | 0 | 0  | 0 | 0  | 0   | 0  |
| 0 | 0 | 0  | 0 | 0  | 0   | 3  |
| 5 | 1 | 16 | 9 | 11 | 109 | 19 |
| 0 | 0 | 0  | 5 | 6  | 1   | 0  |
| 0 | 0 | 0  | 0 | 0  | 0   | 0  |
| 0 | 0 | 0  | 0 | 0  | 0   | 0  |



|   |   |   |   |    |    |    |
|---|---|---|---|----|----|----|
| 0 | 3 | 0 | 0 | 0  | 0  | 0  |
| 0 | 1 | 0 | 1 | 4  | 12 | 22 |
| 0 | 0 | 0 | 0 | 0  | 0  | 0  |
| 0 | 0 | 0 | 0 | 0  | 0  | 3  |
| 0 | 0 | 0 | 2 | 1  | 12 | 0  |
| 0 | 0 | 0 | 1 | 2  | 3  | 2  |
| 0 | 0 | 0 | 9 | 0  | 0  | 0  |
| 0 | 0 | 8 | 7 | 36 | 8  | 6  |
| 0 | 0 | 0 | 0 | 0  | 0  | 0  |
| 0 | 0 | 0 | 0 | 0  | 0  | 0  |
| 0 | 0 | 0 | 1 | 0  | 0  | 0  |
| 0 | 0 | 0 | 0 | 1  | 1  | 0  |
| 0 | 0 | 0 | 0 | 0  | 0  | 0  |
| 0 | 0 | 0 | 2 | 3  | 0  | 0  |
| 0 | 0 | 0 | 0 | 0  | 0  | 0  |
| 0 | 0 | 2 | 2 | 3  | 1  | 0  |
| 0 | 0 | 0 | 0 | 0  | 0  | 0  |
| 0 | 0 | 0 | 0 | 0  | 0  | 0  |
| 0 | 0 | 0 | 0 | 3  | 0  | 0  |
| 0 | 0 | 0 | 6 | 1  | 0  | 0  |
| 0 | 0 | 0 | 0 | 0  | 0  | 0  |
| 0 | 0 | 0 | 0 | 0  | 0  | 0  |
| 0 | 0 | 0 | 0 | 5  | 3  | 1  |
| 0 | 0 | 0 | 0 | 1  | 0  | 0  |
| 0 | 0 | 1 | 0 | 0  | 1  | 2  |
| 0 | 0 | 0 | 0 | 0  | 0  | 0  |
| 0 | 0 | 0 | 0 | 0  | 0  | 0  |
| 0 | 0 | 0 | 0 | 0  | 0  | 0  |
| 0 | 0 | 0 | 0 | 0  | 0  | 0  |
| 0 | 0 | 0 | 0 | 0  | 0  | 0  |
| 0 | 0 | 0 | 0 | 0  | 0  | 0  |
| 0 | 0 | 0 | 0 | 0  | 0  | 0  |
| 0 | 0 | 0 | 0 | 0  | 0  | 0  |
| 0 | 0 | 0 | 1 | 0  | 0  | 0  |
| 0 | 0 | 0 | 0 | 0  | 0  | 0  |
| 0 | 0 | 0 | 0 | 0  | 0  | 0  |
| 0 | 0 | 0 | 0 | 0  | 0  | 0  |
| 0 | 0 | 0 | 0 | 0  | 0  | 0  |
| 0 | 0 | 0 | 0 | 0  | 0  | 0  |
| 0 | 0 | 0 | 0 | 0  | 0  | 0  |
| 0 | 0 | 0 | 0 | 0  | 0  | 0  |
| 0 | 0 | 0 | 0 | 0  | 0  | 0  |
| 0 | 0 | 0 | 0 | 0  | 0  | 0  |
| 0 | 0 | 0 | 0 | 0  | 0  | 0  |
| 0 | 0 | 0 | 0 | 0  | 0  | 0  |
| 0 | 0 | 0 | 0 | 2  | 0  | 0  |
| 0 | 0 | 0 | 0 | 0  | 0  | 0  |
| 0 | 0 | 0 | 0 | 0  | 0  | 0  |
| 0 | 0 | 0 | 0 | 1  | 0  | 0  |
| 0 | 0 | 0 | 0 | 0  | 0  | 0  |
| 0 | 0 | 0 | 0 | 0  | 0  | 0  |



|    |    |     |    |     |     |    |
|----|----|-----|----|-----|-----|----|
| 0  | 0  | 0   | 0  | 0   | 2   | 0  |
| 0  | 0  | 0   | 0  | 0   | 0   | 2  |
| 1  | 0  | 0   | 0  | 0   | 0   | 0  |
| 0  | 0  | 0   | 0  | 0   | 0   | 0  |
| 0  | 0  | 0   | 0  | 0   | 0   | 0  |
| 0  | 0  | 0   | 0  | 0   | 1   | 0  |
| 0  | 0  | 0   | 0  | 0   | 0   | 0  |
| 0  | 0  | 0   | 0  | 1   | 0   | 0  |
| 0  | 0  | 0   | 0  | 0   | 0   | 0  |
| 0  | 0  | 0   | 0  | 0   | 0   | 0  |
| 0  | 0  | 0   | 0  | 1   | 1   | 0  |
| 0  | 0  | 0   | 0  | 0   | 0   | 1  |
| 0  | 0  | 0   | 0  | 0   | 0   | 0  |
| 0  | 0  | 0   | 0  | 0   | 0   | 0  |
| 0  | 0  | 0   | 0  | 0   | 0   | 0  |
| 0  | 0  | 0   | 0  | 0   | 0   | 0  |
| 0  | 0  | 0   | 0  | 0   | 0   | 0  |
| 0  | 0  | 0   | 0  | 0   | 0   | 0  |
| 2  | 2  | 2   | 0  | 0   | 0   | 3  |
| 0  | 0  | 5   | 4  | 0   | 0   | 0  |
| 0  | 0  | 0   | 0  | 0   | 0   | 26 |
| 0  | 0  | 0   | 8  | 0   | 0   | 0  |
| 0  | 0  | 0   | 35 | 2   | 0   | 0  |
| 0  | 0  | 0   | 0  | 0   | 0   | 0  |
| 0  | 0  | 0   | 8  | 0   | 0   | 0  |
| 0  | 0  | 0   | 0  | 0   | 0   | 0  |
| 0  | 0  | 0   | 0  | 0   | 0   | 0  |
| 0  | 0  | 0   | 0  | 0   | 0   | 0  |
| 35 | 0  | 0   | 0  | 0   | 0   | 0  |
| 0  | 0  | 0   | 0  | 0   | 0   | 0  |
| 0  | 37 | 0   | 14 | 5   | 3   | 0  |
| 0  | 0  | 2   | 2  | 0   | 0   | 0  |
| 0  | 0  | 0   | 0  | 0   | 0   | 0  |
| 0  | 0  | 0   | 0  | 0   | 0   | 0  |
| 0  | 0  | 0   | 0  | 1   | 0   | 0  |
| 88 | 20 | 225 | 26 | 34  | 675 | 97 |
| 0  | 0  | 0   | 0  | 0   | 11  | 4  |
| 0  | 0  | 0   | 0  | 0   | 0   | 2  |
| 0  | 0  | 0   | 1  | 3   | 3   | 1  |
| 14 | 0  | 1   | 0  | 0   | 1   | 0  |
| 0  | 0  | 0   | 0  | 0   | 0   | 0  |
| 0  | 0  | 0   | 0  | 0   | 0   | 0  |
| 0  | 0  | 0   | 0  | 0   | 0   | 0  |
| 0  | 0  | 0   | 0  | 0   | 0   | 0  |
| 0  | 0  | 0   | 0  | 0   | 0   | 0  |
| 0  | 1  | 21  | 0  | 1   | 174 | 32 |
| 0  | 0  | 0   | 7  | 0   | 0   | 0  |
| 8  | 0  | 70  | 1  | 4   | 143 | 14 |
| 0  | 0  | 0   | 0  | 0   | 0   | 0  |
| 38 | 0  | 0   | 0  | 0   | 0   | 0  |
| 1  | 0  | 7   | 15 | 185 | 561 | 9  |



|    |    |     |    |     |     |     |
|----|----|-----|----|-----|-----|-----|
| 0  | 0  | 0   | 0  | 0   | 0   | 1   |
| 14 | 24 | 66  | 28 | 39  | 206 | 250 |
| 2  | 0  | 7   | 5  | 0   | 0   | 6   |
| 0  | 0  | 0   | 0  | 0   | 0   | 0   |
| 1  | 0  | 2   | 0  | 0   | 0   | 0   |
| 0  | 0  | 0   | 0  | 0   | 0   | 0   |
| 0  | 0  | 0   | 0  | 0   | 0   | 2   |
| 0  | 0  | 0   | 5  | 0   | 0   | 0   |
| 0  | 0  | 0   | 0  | 0   | 0   | 0   |
| 3  | 14 | 247 | 40 | 332 | 497 | 744 |
| 14 | 1  | 32  | 14 | 138 | 32  | 57  |
| 0  | 0  | 0   | 0  | 0   | 2   | 0   |
| 0  | 0  | 0   | 8  | 0   | 0   | 0   |
| 0  | 0  | 0   | 2  | 4   | 0   | 1   |
| 0  | 0  | 0   | 0  | 0   | 0   | 0   |
| 0  | 0  | 0   | 2  | 0   | 0   | 0   |
| 0  | 0  | 0   | 0  | 0   | 0   | 0   |
| 0  | 0  | 0   | 11 | 0   | 0   | 2   |
| 0  | 0  | 0   | 0  | 0   | 0   | 0   |
| 0  | 0  | 0   | 0  | 0   | 0   | 0   |
| 0  | 0  | 0   | 9  | 0   | 1   | 0   |
| 0  | 0  | 0   | 0  | 0   | 0   | 0   |
| 0  | 0  | 0   | 0  | 0   | 0   | 0   |
| 0  | 0  | 1   | 0  | 0   | 0   | 0   |
| 0  | 0  | 0   | 0  | 0   | 0   | 0   |
| 0  | 0  | 0   | 0  | 0   | 0   | 0   |
| 0  | 0  | 0   | 0  | 0   | 0   | 0   |
| 0  | 0  | 0   | 0  | 0   | 0   | 0   |
| 0  | 0  | 0   | 0  | 0   | 0   | 0   |
| 0  | 0  | 0   | 0  | 0   | 0   | 0   |
| 0  | 0  | 0   | 0  | 0   | 0   | 0   |
| 0  | 0  | 0   | 0  | 0   | 0   | 0   |
| 0  | 0  | 2   | 5  | 20  | 0   | 0   |
| 0  | 0  | 0   | 0  | 0   | 0   | 0   |
| 0  | 0  | 0   | 0  | 0   | 0   | 2   |
| 0  | 0  | 10  | 40 | 193 | 6   | 31  |
| 0  | 0  | 0   | 11 | 1   | 0   | 0   |
| 1  | 0  | 0   | 0  | 0   | 0   | 0   |
| 3  | 0  | 0   | 0  | 0   | 0   | 0   |
| 47 | 0  | 0   | 0  | 0   | 0   | 0   |
| 0  | 0  | 0   | 1  | 0   | 0   | 0   |
| 0  | 1  | 19  | 63 | 64  | 2   | 14  |
| 0  | 1  | 0   | 45 | 25  | 0   | 0   |
| 0  | 0  | 0   | 0  | 0   | 0   | 0   |
| 0  | 0  | 0   | 27 | 0   | 0   | 0   |
| 0  | 0  | 0   | 0  | 0   | 0   | 0   |
| 0  | 0  | 0   | 0  | 0   | 0   | 0   |
| 0  | 0  | 0   | 7  | 0   | 0   | 0   |
| 0  | 1  | 0   | 0  | 0   | 0   | 0   |

|   |   |    |      |    |    |      |
|---|---|----|------|----|----|------|
| 0 | 0 | 0  | 39   | 3  | 0  | 5    |
| 0 | 0 | 0  | 0    | 0  | 0  | 4    |
| 0 | 0 | 0  | 0    | 0  | 0  | 0    |
| 5 | 0 | 8  | 147  | 0  | 0  | 9    |
| 0 | 0 | 0  | 0    | 1  | 2  | 0    |
| 0 | 0 | 0  | 0    | 0  | 0  | 0    |
| 2 | 3 | 12 | 19   | 96 | 14 | 3    |
| 0 | 0 | 0  | 0    | 30 | 0  | 0    |
| 0 | 0 | 0  | 5    | 0  | 0  | 0    |
| 0 | 0 | 2  | 0    | 0  | 0  | 0    |
| 0 | 0 | 0  | 0    | 0  | 0  | 5    |
| 0 | 0 | 0  | 0    | 0  | 0  | 0    |
| 0 | 0 | 0  | 13   | 2  | 0  | 0    |
| 0 | 0 | 0  | 0    | 0  | 0  | 0    |
| 2 | 0 | 0  | 1878 | 56 | 4  | 1456 |
| 0 | 0 | 0  | 1    | 0  | 0  | 8    |
| 0 | 0 | 0  | 12   | 1  | 0  | 0    |
| 0 | 0 | 0  | 0    | 0  | 0  | 0    |
| 0 | 0 | 0  | 0    | 2  | 0  | 0    |
| 0 | 0 | 0  | 0    | 0  | 0  | 0    |
| 0 | 0 | 0  | 0    | 0  | 0  | 0    |
| 0 | 0 | 0  | 0    | 0  | 0  | 0    |
| 0 | 0 | 0  | 0    | 0  | 0  | 0    |
| 0 | 0 | 0  | 8    | 0  | 0  | 8    |
| 0 | 0 | 0  | 7    | 0  | 0  | 1    |
| 0 | 0 | 0  | 0    | 0  | 0  | 0    |
| 0 | 0 | 0  | 12   | 0  | 0  | 2    |
| 0 | 0 | 0  | 0    | 0  | 0  | 0    |

| 109.DCM | 111.SUR | 111.DCM | 122.SUR | 122.DCM | 123.SUR | 123.DCM |
|---------|---------|---------|---------|---------|---------|---------|
| 0       | 0       | 0       | 0       | 0       | 0       | 0       |
| 0       | 0       | 0       | 6       | 0       | 14      | 0       |
| 8       | 0       | 0       | 17      | 0       | 0       | 0       |
| 2       | 0       | 0       | 3       | 0       | 3       | 0       |
| 0       | 0       | 0       | 0       | 0       | 0       | 0       |
| 0       | 0       | 0       | 0       | 0       | 0       | 0       |
| 0       | 0       | 0       | 3       | 0       | 0       | 0       |
| 34      | 1       | 43      | 0       | 0       | 0       | 37      |
| 1       | 0       | 1       | 0       | 0       | 0       | 0       |
| 1       | 0       | 0       | 0       | 0       | 0       | 0       |
| 0       | 0       | 0       | 0       | 0       | 0       | 0       |
| 0       | 0       | 0       | 0       | 0       | 0       | 0       |
| 2       | 0       | 0       | 0       | 0       | 0       | 0       |
| 1       | 0       | 0       | 0       | 0       | 0       | 0       |
| 0       | 0       | 0       | 0       | 4       | 3       | 0       |
| 0       | 0       | 1       | 0       | 0       | 0       | 0       |
| 608     | 4       | 40      | 18      | 240     | 0       | 52      |
| 115     | 364     | 238     | 60      | 186     | 330     | 55      |
| 2       | 26      | 56      | 1       | 8       | 0       | 0       |
| 2       | 0       | 0       | 6       | 0       | 6       | 7       |
| 0       | 23      | 22      | 12      | 46      | 1       | 2       |
| 0       | 0       | 0       | 0       | 0       | 0       | 0       |
| 9       | 0       | 0       | 0       | 0       | 0       | 0       |
| 0       | 0       | 6       | 0       | 0       | 0       | 0       |
| 0       | 0       | 0       | 0       | 8       | 0       | 4       |
| 0       | 0       | 0       | 0       | 0       | 0       | 0       |
| 0       | 0       | 0       | 0       | 0       | 0       | 1       |
| 0       | 0       | 0       | 0       | 0       | 0       | 0       |
| 0       | 0       | 0       | 0       | 0       | 0       | 0       |
| 0       | 0       | 0       | 0       | 1       | 0       | 0       |
| 25      | 0       | 0       | 0       | 0       | 0       | 1       |
| 0       | 0       | 0       | 0       | 0       | 0       | 0       |
| 90      | 0       | 27      | 0       | 26      | 0       | 4       |
| 3       | 42      | 42      | 0       | 0       | 0       | 0       |
| 0       | 0       | 0       | 0       | 0       | 0       | 0       |
| 0       | 0       | 0       | 0       | 0       | 0       | 0       |
| 5       | 9       | 39      | 21      | 133     | 0       | 11      |
| 48      | 0       | 7       | 156     | 33      | 417     | 3       |
| 21      | 187     | 35      | 121     | 55      | 93      | 203     |
| 4       | 1       | 32      | 0       | 0       | 0       | 0       |
| 3       | 16      | 200     | 6       | 141     | 0       | 181     |
| 30      | 2       | 4       | 0       | 0       | 0       | 0       |
| 0       | 1       | 24      | 2       | 104     | 38      | 0       |
| 30      | 26      | 69      | 33      | 73      | 22      | 4       |
| 2       | 0       | 14      | 3       | 30      | 0       | 9       |
| 0       | 1       | 95      | 4       | 68      | 0       | 0       |
| 16      | 2       | 45      | 3       | 49      | 0       | 8       |

|    |     |     |    |     |     |     |
|----|-----|-----|----|-----|-----|-----|
| 0  | 1   | 45  | 0  | 0   | 0   | 6   |
| 3  | 1   | 13  | 0  | 52  | 0   | 4   |
| 2  | 0   | 9   | 0  | 13  | 0   | 30  |
| 26 | 1   | 49  | 7  | 126 | 0   | 10  |
| 0  | 0   | 14  | 1  | 40  | 0   | 4   |
| 0  | 1   | 44  | 2  | 22  | 0   | 0   |
| 3  | 0   | 17  | 0  | 0   | 0   | 5   |
| 8  | 0   | 0   | 3  | 0   | 31  | 3   |
| 0  | 0   | 0   | 0  | 0   | 0   | 0   |
| 0  | 0   | 0   | 0  | 0   | 0   | 0   |
| 5  | 12  | 1   | 10 | 0   | 2   | 1   |
| 0  | 0   | 23  | 0  | 0   | 0   | 0   |
| 0  | 0   | 1   | 0  | 17  | 0   | 0   |
| 0  | 0   | 5   | 0  | 0   | 0   | 0   |
| 0  | 0   | 8   | 1  | 7   | 0   | 0   |
| 10 | 0   | 0   | 0  | 0   | 0   | 0   |
| 1  | 0   | 0   | 0  | 0   | 0   | 0   |
| 3  | 0   | 2   | 0  | 7   | 0   | 0   |
| 0  | 0   | 0   | 0  | 0   | 0   | 0   |
| 0  | 0   | 0   | 0  | 0   | 0   | 0   |
| 0  | 0   | 0   | 0  | 0   | 0   | 0   |
| 0  | 0   | 0   | 0  | 0   | 0   | 0   |
| 0  | 0   | 0   | 0  | 0   | 0   | 0   |
| 0  | 0   | 0   | 0  | 0   | 0   | 0   |
| 0  | 0   | 0   | 0  | 0   | 0   | 0   |
| 0  | 0   | 0   | 0  | 0   | 0   | 0   |
| 0  | 0   | 0   | 0  | 0   | 0   | 0   |
| 0  | 0   | 0   | 0  | 1   | 3   | 0   |
| 0  | 0   | 1   | 0  | 0   | 0   | 0   |
| 0  | 0   | 0   | 0  | 0   | 0   | 0   |
| 0  | 2   | 6   | 0  | 8   | 0   | 0   |
| 0  | 1   | 10  | 0  | 14  | 0   | 4   |
| 0  | 0   | 6   | 0  | 0   | 0   | 0   |
| 0  | 0   | 4   | 0  | 0   | 0   | 0   |
| 0  | 0   | 0   | 0  | 0   | 0   | 0   |
| 0  | 0   | 0   | 0  | 0   | 0   | 0   |
| 0  | 0   | 0   | 0  | 0   | 0   | 0   |
| 0  | 0   | 0   | 0  | 0   | 0   | 0   |
| 1  | 0   | 0   | 0  | 0   | 0   | 1   |
| 0  | 0   | 0   | 0  | 0   | 0   | 0   |
| 0  | 0   | 0   | 0  | 3   | 0   | 0   |
| 8  | 84  | 786 | 55 | 411 | 35  | 568 |
| 40 | 2   | 38  | 0  | 0   | 0   | 0   |
| 16 | 145 | 442 | 6  | 0   | 0   | 0   |
| 0  | 0   | 41  | 0  | 55  | 0   | 103 |
| 0  | 0   | 0   | 0  | 0   | 214 | 2   |
| 6  | 0   | 0   | 0  | 0   | 0   | 0   |
| 0  | 0   | 2   | 0  | 0   | 0   | 26  |
| 2  | 0   | 0   | 0  | 0   | 0   | 0   |
| 0  | 0   | 0   | 0  | 0   | 0   | 0   |

|    |    |    |    |     |     |    |
|----|----|----|----|-----|-----|----|
| 0  | 0  | 0  | 0  | 0   | 0   | 0  |
| 0  | 0  | 0  | 0  | 0   | 0   | 0  |
| 0  | 0  | 0  | 0  | 0   | 0   | 0  |
| 0  | 1  | 4  | 0  | 0   | 3   | 0  |
| 0  | 0  | 0  | 5  | 0   | 0   | 0  |
| 2  | 0  | 0  | 0  | 0   | 0   | 0  |
| 0  | 0  | 0  | 0  | 0   | 0   | 0  |
| 0  | 0  | 0  | 0  | 0   | 0   | 0  |
| 0  | 0  | 0  | 0  | 0   | 0   | 0  |
| 0  | 0  | 0  | 0  | 0   | 0   | 0  |
| 0  | 0  | 0  | 0  | 0   | 0   | 0  |
| 0  | 0  | 0  | 0  | 0   | 0   | 0  |
| 0  | 0  | 0  | 0  | 0   | 0   | 0  |
| 10 | 0  | 0  | 0  | 0   | 0   | 0  |
| 0  | 0  | 0  | 19 | 0   | 9   | 5  |
| 0  | 0  | 0  | 0  | 0   | 0   | 0  |
| 0  | 0  | 13 | 0  | 3   | 0   | 0  |
| 0  | 0  | 0  | 0  | 0   | 28  | 39 |
| 0  | 0  | 0  | 0  | 0   | 0   | 0  |
| 8  | 0  | 0  | 0  | 0   | 1   | 6  |
| 0  | 0  | 0  | 0  | 0   | 0   | 0  |
| 0  | 0  | 0  | 0  | 3   | 0   | 0  |
| 1  | 0  | 11 | 4  | 21  | 0   | 3  |
| 6  | 0  | 58 | 0  | 8   | 0   | 8  |
| 0  | 0  | 0  | 0  | 0   | 0   | 4  |
| 2  | 9  | 8  | 29 | 131 | 6   | 9  |
| 1  | 19 | 12 | 11 | 0   | 0   | 0  |
| 18 | 15 | 3  | 0  | 0   | 19  | 0  |
| 20 | 32 | 13 | 12 | 45  | 0   | 0  |
| 0  | 0  | 0  | 0  | 0   | 0   | 0  |
| 0  | 0  | 5  | 0  | 0   | 0   | 0  |
| 0  | 0  | 3  | 0  | 0   | 0   | 0  |
| 39 | 0  | 30 | 0  | 0   | 0   | 0  |
| 1  | 0  | 19 | 2  | 14  | 0   | 6  |
| 4  | 0  | 16 | 0  | 3   | 0   | 8  |
| 11 | 0  | 48 | 0  | 0   | 0   | 4  |
| 0  | 0  | 0  | 1  | 0   | 170 | 59 |
| 0  | 0  | 13 | 6  | 58  | 0   | 3  |
| 0  | 0  | 0  | 1  | 7   | 0   | 0  |
| 3  | 0  | 1  | 0  | 0   | 0   | 2  |
| 0  | 0  | 0  | 0  | 0   | 0   | 0  |
| 0  | 1  | 4  | 0  | 0   | 0   | 0  |
| 0  | 1  | 9  | 0  | 0   | 0   | 4  |
| 0  | 0  | 0  | 0  | 0   | 0   | 0  |
| 0  | 0  | 0  | 0  | 0   | 0   | 0  |
| 0  | 0  | 0  | 0  | 0   | 0   | 0  |
| 7  | 0  | 3  | 0  | 0   | 0   | 2  |
| 0  | 0  | 0  | 0  | 0   | 2   | 0  |

|     |    |     |     |     |    |    |
|-----|----|-----|-----|-----|----|----|
| 0   | 1  | 4   | 0   | 0   | 0  | 0  |
| 0   | 0  | 0   | 0   | 0   | 0  | 0  |
| 14  | 13 | 168 | 16  | 118 | 4  | 21 |
| 290 | 0  | 0   | 0   | 0   | 0  | 0  |
| 0   | 0  | 2   | 0   | 0   | 0  | 0  |
| 0   | 0  | 0   | 0   | 0   | 0  | 0  |
| 0   | 0  | 0   | 0   | 0   | 0  | 0  |
| 5   | 0  | 0   | 0   | 0   | 0  | 0  |
| 0   | 0  | 0   | 0   | 0   | 0  | 2  |
| 0   | 0  | 0   | 0   | 0   | 40 | 10 |
| 2   | 5  | 8   | 1   | 8   | 0  | 0  |
| 0   | 0  | 2   | 0   | 0   | 0  | 1  |
| 26  | 53 | 215 | 190 | 727 | 95 | 54 |
| 0   | 0  | 0   | 0   | 0   | 0  | 0  |
| 1   | 0  | 20  | 3   | 22  | 0  | 0  |
| 0   | 0  | 0   | 14  | 57  | 0  | 2  |
| 0   | 4  | 33  | 4   | 15  | 0  | 0  |
| 18  | 25 | 18  | 7   | 22  | 1  | 4  |
| 0   | 0  | 0   | 0   | 0   | 0  | 0  |
| 0   | 0  | 0   | 1   | 2   | 0  | 0  |
| 0   | 0  | 0   | 0   | 0   | 0  | 0  |
| 0   | 0  | 0   | 0   | 0   | 0  | 0  |
| 0   | 0  | 0   | 0   | 0   | 0  | 0  |
| 0   | 0  | 0   | 0   | 2   | 0  | 0  |
| 0   | 0  | 0   | 0   | 0   | 0  | 0  |
| 0   | 0  | 3   | 0   | 0   | 0  | 0  |
| 0   | 0  | 0   | 0   | 0   | 0  | 0  |
| 0   | 0  | 0   | 0   | 0   | 0  | 0  |
| 0   | 0  | 1   | 3   | 0   | 0  | 0  |
| 0   | 0  | 0   | 0   | 0   | 0  | 18 |
| 0   | 0  | 0   | 0   | 0   | 0  | 6  |
| 6   | 0  | 0   | 0   | 0   | 0  | 0  |
| 0   | 0  | 38  | 0   | 0   | 0  | 1  |
| 0   | 0  | 2   | 0   | 4   | 0  | 1  |
| 0   | 0  | 0   | 0   | 0   | 0  | 0  |
| 0   | 0  | 0   | 0   | 0   | 0  | 0  |
| 0   | 0  | 0   | 0   | 0   | 0  | 0  |
| 15  | 43 | 0   | 0   | 2   | 0  | 63 |
| 1   | 15 | 21  | 0   | 0   | 0  | 0  |
| 1   | 0  | 0   | 0   | 1   | 0  | 0  |
| 0   | 0  | 0   | 0   | 0   | 0  | 0  |
| 677 | 10 | 4   | 1   | 1   | 43 | 24 |
| 5   | 1  | 65  | 2   | 29  | 0  | 25 |
| 58  | 1  | 27  | 0   | 5   | 0  | 7  |
| 0   | 0  | 0   | 0   | 0   | 0  | 0  |
| 17  | 0  | 19  | 5   | 3   | 5  | 6  |
| 0   | 0  | 1   | 0   | 0   | 0  | 2  |

|      |    |     |      |      |      |      |
|------|----|-----|------|------|------|------|
| 0    | 0  | 0   | 0    | 0    | 0    | 4    |
| 0    | 0  | 0   | 0    | 0    | 1    | 24   |
| 0    | 0  | 0   | 0    | 0    | 0    | 0    |
| 2    | 0  | 0   | 0    | 0    | 0    | 0    |
| 0    | 0  | 0   | 0    | 0    | 0    | 0    |
| 6    | 0  | 6   | 0    | 8    | 0    | 0    |
| 0    | 0  | 0   | 6    | 3    | 4    | 39   |
| 0    | 0  | 0   | 0    | 0    | 0    | 0    |
| 0    | 0  | 0   | 2    | 9    | 1    | 6    |
| 0    | 0  | 0   | 0    | 2    | 0    | 3    |
| 0    | 0  | 0   | 0    | 0    | 0    | 0    |
| 0    | 0  | 0   | 0    | 0    | 0    | 0    |
| 0    | 0  | 0   | 0    | 0    | 0    | 0    |
| 5    | 1  | 0   | 0    | 0    | 0    | 0    |
| 0    | 0  | 0   | 0    | 0    | 0    | 0    |
| 0    | 0  | 0   | 0    | 0    | 0    | 0    |
| 0    | 0  | 0   | 0    | 1    | 0    | 0    |
| 0    | 0  | 1   | 0    | 0    | 1    | 1    |
| 1    | 0  | 0   | 0    | 0    | 0    | 0    |
| 0    | 0  | 0   | 0    | 7    | 1    | 131  |
| 0    | 0  | 10  | 5    | 56   | 0    | 23   |
| 0    | 0  | 0   | 0    | 0    | 0    | 0    |
| 0    | 0  | 0   | 0    | 0    | 0    | 0    |
| 4425 | 42 | 361 | 1516 | 3245 | 2030 | 4218 |
| 1    | 14 | 72  | 16   | 25   | 36   | 15   |
| 0    | 0  | 0   | 8    | 10   | 2    | 0    |
| 0    | 0  | 0   | 0    | 0    | 0    | 0    |
| 38   | 0  | 0   | 0    | 1    | 0    | 0    |
| 0    | 0  | 0   | 0    | 0    | 0    | 0    |
| 1    | 1  | 0   | 0    | 0    | 0    | 0    |
| 0    | 0  | 0   | 0    | 0    | 0    | 0    |
| 1    | 0  | 0   | 0    | 0    | 2    | 2    |
| 0    | 0  | 0   | 0    | 0    | 0    | 0    |
| 0    | 0  | 0   | 0    | 0    | 0    | 0    |
| 1    | 0  | 0   | 0    | 0    | 0    | 0    |
| 0    | 0  | 38  | 0    | 0    | 0    | 0    |
| 229  | 39 | 132 | 12   | 100  | 179  | 421  |
| 58   | 1  | 2   | 35   | 48   | 138  | 340  |
| 22   | 11 | 3   | 6    | 303  | 5    | 19   |
| 185  | 5  | 15  | 8    | 108  | 18   | 62   |
| 1    | 0  | 2   | 0    | 83   | 0    | 14   |
| 0    | 0  | 0   | 0    | 0    | 0    | 0    |
| 0    | 0  | 0   | 0    | 0    | 0    | 0    |
| 0    | 0  | 0   | 0    | 0    | 0    | 0    |
| 18   | 0  | 0   | 0    | 0    | 2    | 0    |
| 10   | 0  | 5   | 0    | 19   | 0    | 1    |
| 0    | 0  | 0   | 0    | 0    | 0    | 0    |
| 0    | 0  | 1   | 0    | 2    | 0    | 1    |

|    |    |     |     |      |     |     |
|----|----|-----|-----|------|-----|-----|
| 75 | 0  | 0   | 0   | 2    | 0   | 0   |
| 20 | 0  | 15  | 0   | 0    | 0   | 0   |
| 0  | 0  | 1   | 0   | 0    | 0   | 0   |
| 10 | 0  | 2   | 2   | 14   | 0   | 35  |
| 0  | 0  | 0   | 0   | 0    | 0   | 0   |
| 0  | 0  | 0   | 0   | 0    | 0   | 0   |
| 0  | 0  | 0   | 0   | 0    | 0   | 0   |
| 7  | 0  | 0   | 0   | 0    | 0   | 2   |
| 3  | 0  | 3   | 0   | 2    | 0   | 7   |
| 8  | 0  | 0   | 0   | 0    | 0   | 0   |
| 9  | 0  | 0   | 0   | 0    | 0   | 0   |
| 5  | 0  | 0   | 0   | 0    | 0   | 0   |
| 2  | 0  | 0   | 0   | 0    | 0   | 0   |
| 0  | 0  | 0   | 0   | 0    | 0   | 0   |
| 4  | 0  | 0   | 0   | 0    | 0   | 0   |
| 0  | 0  | 0   | 0   | 6    | 0   | 0   |
| 1  | 0  | 4   | 0   | 0    | 0   | 0   |
| 0  | 0  | 0   | 0   | 0    | 0   | 0   |
| 0  | 0  | 0   | 0   | 0    | 0   | 0   |
| 0  | 0  | 0   | 0   | 0    | 14  | 0   |
| 0  | 0  | 0   | 0   | 0    | 0   | 0   |
| 1  | 10 | 0   | 0   | 0    | 2   | 5   |
| 0  | 0  | 0   | 0   | 0    | 0   | 0   |
| 68 | 33 | 903 | 237 | 1038 | 60  | 862 |
| 1  | 0  | 12  | 6   | 0    | 182 | 11  |
| 0  | 1  | 8   | 0   | 1    | 1   | 3   |
| 2  | 0  | 3   | 0   | 0    | 0   | 1   |
| 0  | 0  | 5   | 0   | 0    | 2   | 0   |
| 0  | 0  | 0   | 0   | 0    | 0   | 0   |
| 0  | 0  | 0   | 0   | 2    | 0   | 0   |
| 0  | 0  | 0   | 0   | 0    | 0   | 0   |
| 0  | 0  | 0   | 0   | 0    | 0   | 0   |
| 2  | 0  | 25  | 0   | 14   | 0   | 4   |
| 0  | 1  | 20  | 7   | 48   | 0   | 0   |
| 0  | 0  | 0   | 0   | 0    | 0   | 0   |
| 5  | 0  | 0   | 0   | 0    | 0   | 0   |
| 0  | 0  | 0   | 1   | 0    | 0   | 6   |
| 24 | 0  | 1   | 5   | 49   | 0   | 140 |
| 3  | 1  | 0   | 0   | 0    | 1   | 2   |
| 0  | 0  | 3   | 0   | 14   | 0   | 6   |
| 4  | 0  | 0   | 1   | 4    | 0   | 2   |
| 2  | 0  | 0   | 0   | 0    | 0   | 0   |
| 0  | 0  | 0   | 0   | 0    | 0   | 2   |
| 0  | 0  | 7   | 0   | 0    | 0   | 4   |
| 0  | 0  | 0   | 0   | 5    | 0   | 0   |
| 0  | 0  | 0   | 0   | 0    | 0   | 0   |
| 0  | 0  | 34  | 0   | 0    | 0   | 0   |
| 5  | 0  | 0   | 0   | 0    | 0   | 0   |



|      |     |      |     |      |     |      |
|------|-----|------|-----|------|-----|------|
| 3    | 0   | 11   | 0   | 9    | 0   | 15   |
| 0    | 0   | 0    | 0   | 5    | 0   | 6    |
| 0    | 0   | 0    | 0   | 0    | 0   | 0    |
| 85   | 194 | 153  | 49  | 74   | 5   | 2    |
| 0    | 0   | 0    | 0   | 0    | 0   | 0    |
| 15   | 244 | 42   | 15  | 3    | 52  | 4    |
| 2183 | 10  | 3    | 186 | 72   | 17  | 52   |
| 0    | 0   | 0    | 0   | 0    | 1   | 0    |
| 1    | 0   | 0    | 0   | 1    | 0   | 0    |
| 0    | 0   | 0    | 0   | 0    | 0   | 0    |
| 0    | 0   | 0    | 0   | 0    | 0   | 0    |
| 826  | 830 | 3731 | 652 | 4312 | 811 | 1140 |
| 26   | 27  | 52   | 337 | 216  | 227 | 3    |
| 7    | 5   | 362  | 18  | 208  | 55  | 36   |
| 2    | 2   | 135  | 58  | 190  | 38  | 38   |
| 7    | 3   | 197  | 95  | 258  | 203 | 56   |
| 12   | 5   | 59   | 20  | 140  | 8   | 39   |
| 18   | 45  | 25   | 23  | 14   | 9   | 70   |
| 0    | 0   | 24   | 3   | 27   | 2   | 15   |
| 0    | 0   | 0    | 0   | 17   | 3   | 18   |
| 12   | 3   | 192  | 4   | 105  | 0   | 56   |
| 18   | 23  | 88   | 47  | 236  | 12  | 46   |
| 65   | 3   | 269  | 0   | 0    | 0   | 17   |
| 0    | 3   | 49   | 14  | 41   | 0   | 25   |
| 23   | 0   | 43   | 0   | 16   | 0   | 70   |
| 288  | 0   | 3    | 0   | 0    | 0   | 0    |
| 0    | 0   | 0    | 0   | 0    | 0   | 0    |
| 26   | 2   | 124  | 4   | 71   | 0   | 6    |
| 0    | 0   | 16   | 0   | 0    | 0   | 0    |
| 19   | 4   | 40   | 2   | 32   | 0   | 7    |
| 2    | 1   | 70   | 3   | 0    | 0   | 3    |
| 0    | 0   | 3    | 0   | 0    | 0   | 0    |
| 0    | 1   | 98   | 448 | 6    | 3   | 0    |
| 1    | 0   | 1    | 2   | 2    | 0   | 1    |
| 7    | 0   | 0    | 0   | 0    | 0   | 3    |
| 0    | 0   | 0    | 0   | 0    | 0   | 0    |
| 40   | 61  | 126  | 15  | 72   | 29  | 42   |
| 4    | 0   | 0    | 0   | 3    | 0   | 8    |
| 4    | 0   | 13   | 0   | 0    | 0   | 77   |
| 2    | 0   | 0    | 0   | 0    | 0   | 0    |
| 0    | 0   | 2    | 23  | 222  | 0   | 6    |
| 2    | 10  | 2    | 5   | 0    | 0   | 0    |
| 4    | 37  | 32   | 0   | 5    | 3   | 5    |
| 2    | 0   | 41   | 0   | 0    | 0   | 20   |
| 93   | 1   | 12   | 0   | 0    | 0   | 0    |
| 0    | 0   | 0    | 0   | 14   | 0   | 0    |
| 0    | 0   | 12   | 1   | 16   | 0   | 6    |
| 0    | 0   | 0    | 0   | 0    | 0   | 78   |

|    |    |    |   |    |    |    |
|----|----|----|---|----|----|----|
| 69 | 0  | 2  | 0 | 0  | 0  | 16 |
| 4  | 3  | 9  | 3 | 38 | 0  | 12 |
| 2  | 0  | 1  | 5 | 8  | 0  | 34 |
| 0  | 15 | 7  | 6 | 0  | 0  | 0  |
| 0  | 1  | 1  | 0 | 0  | 0  | 0  |
| 0  | 0  | 0  | 0 | 0  | 0  | 0  |
| 0  | 0  | 0  | 0 | 0  | 0  | 0  |
| 5  | 0  | 0  | 2 | 16 | 1  | 0  |
| 34 | 0  | 21 | 0 | 15 | 0  | 0  |
| 0  | 3  | 73 | 0 | 0  | 0  | 0  |
| 30 | 0  | 0  | 0 | 0  | 0  | 0  |
| 0  | 0  | 47 | 0 | 0  | 0  | 0  |
| 0  | 0  | 0  | 0 | 0  | 0  | 0  |
| 0  | 0  | 18 | 0 | 0  | 0  | 2  |
| 1  | 0  | 4  | 0 | 0  | 0  | 6  |
| 0  | 1  | 7  | 0 | 18 | 0  | 43 |
| 0  | 0  | 6  | 0 | 0  | 0  | 0  |
| 6  | 0  | 9  | 0 | 0  | 0  | 0  |
| 0  | 0  | 0  | 0 | 0  | 0  | 0  |
| 0  | 0  | 0  | 0 | 8  | 0  | 0  |
| 0  | 0  | 14 | 0 | 0  | 0  | 0  |
| 11 | 0  | 2  | 1 | 20 | 0  | 2  |
| 20 | 0  | 0  | 0 | 0  | 0  | 0  |
| 2  | 0  | 0  | 0 | 0  | 0  | 0  |
| 0  | 0  | 3  | 0 | 13 | 0  | 0  |
| 0  | 0  | 0  | 0 | 0  | 0  | 1  |
| 0  | 1  | 7  | 0 | 0  | 0  | 0  |
| 0  | 0  | 0  | 0 | 0  | 15 | 0  |
| 0  | 0  | 0  | 0 | 0  | 0  | 0  |
| 0  | 0  | 3  | 0 | 0  | 0  | 0  |
| 0  | 0  | 5  | 2 | 0  | 12 | 0  |
| 2  | 1  | 4  | 0 | 1  | 1  | 0  |
| 0  | 1  | 3  | 0 | 2  | 1  | 0  |
| 1  | 5  | 2  | 0 | 3  | 0  | 1  |
| 4  | 1  | 3  | 1 | 12 | 0  | 6  |
| 6  | 0  | 1  | 0 | 1  | 0  | 1  |
| 0  | 0  | 4  | 0 | 21 | 1  | 2  |
| 0  | 0  | 0  | 0 | 0  | 0  | 0  |
| 0  | 0  | 0  | 0 | 0  | 0  | 0  |
| 0  | 0  | 0  | 0 | 0  | 0  | 0  |
| 0  | 0  | 0  | 0 | 0  | 0  | 2  |
| 0  | 0  | 0  | 0 | 0  | 0  | 0  |
| 7  | 0  | 0  | 0 | 0  | 0  | 0  |
| 0  | 2  | 9  | 0 | 0  | 0  | 0  |
| 2  | 0  | 0  | 0 | 7  | 0  | 5  |
| 4  | 2  | 0  | 0 | 0  | 0  | 0  |
| 0  | 1  | 6  | 0 | 0  | 0  | 0  |
| 1  | 0  | 0  | 0 | 0  | 0  | 2  |

|    |    |     |    |     |     |     |
|----|----|-----|----|-----|-----|-----|
| 2  | 0  | 0   | 0  | 9   | 0   | 0   |
| 0  | 0  | 1   | 0  | 0   | 0   | 0   |
| 2  | 0  | 0   | 0  | 0   | 0   | 0   |
| 0  | 0  | 0   | 0  | 0   | 0   | 0   |
| 0  | 0  | 0   | 0  | 0   | 0   | 0   |
| 0  | 0  | 1   | 0  | 0   | 0   | 0   |
| 0  | 0  | 0   | 0  | 0   | 0   | 0   |
| 0  | 2  | 0   | 0  | 0   | 0   | 0   |
| 0  | 0  | 0   | 0  | 0   | 0   | 0   |
| 1  | 3  | 2   | 0  | 3   | 0   | 2   |
| 0  | 0  | 1   | 0  | 0   | 0   | 0   |
| 0  | 0  | 0   | 0  | 0   | 0   | 0   |
| 0  | 0  | 0   | 0  | 0   | 0   | 0   |
| 0  | 0  | 0   | 0  | 1   | 0   | 0   |
| 0  | 0  | 0   | 0  | 0   | 0   | 0   |
| 0  | 0  | 0   | 0  | 0   | 0   | 0   |
| 0  | 0  | 0   | 0  | 0   | 0   | 0   |
| 0  | 0  | 0   | 0  | 0   | 0   | 0   |
| 0  | 0  | 0   | 0  | 0   | 0   | 0   |
| 0  | 0  | 0   | 0  | 0   | 0   | 0   |
| 0  | 0  | 0   | 0  | 3   | 0   | 1   |
| 1  | 0  | 0   | 0  | 0   | 0   | 0   |
| 0  | 0  | 0   | 0  | 0   | 0   | 0   |
| 0  | 0  | 0   | 0  | 0   | 0   | 1   |
| 0  | 0  | 0   | 0  | 0   | 0   | 0   |
| 0  | 0  | 0   | 0  | 0   | 0   | 0   |
| 0  | 0  | 0   | 0  | 0   | 0   | 0   |
| 0  | 0  | 1   | 0  | 0   | 0   | 0   |
| 0  | 0  | 0   | 0  | 0   | 0   | 0   |
| 0  | 0  | 0   | 0  | 0   | 0   | 0   |
| 0  | 0  | 0   | 0  | 0   | 0   | 0   |
| 0  | 0  | 0   | 0  | 0   | 0   | 0   |
| 0  | 0  | 1   | 0  | 0   | 0   | 0   |
| 0  | 0  | 0   | 0  | 0   | 0   | 0   |
| 0  | 0  | 0   | 0  | 0   | 0   | 0   |
| 5  | 1  | 16  | 4  | 57  | 0   | 3   |
| 0  | 0  | 10  | 0  | 4   | 0   | 0   |
| 0  | 0  | 1   | 0  | 0   | 0   | 2   |
| 4  | 0  | 0   | 0  | 0   | 0   | 0   |
| 2  | 0  | 0   | 0  | 0   | 0   | 0   |
| 0  | 0  | 1   | 0  | 0   | 0   | 3   |
| 10 | 5  | 179 | 49 | 71  | 14  | 27  |
| 0  | 17 | 165 | 0  | 80  | 0   | 271 |
| 0  | 0  | 65  | 11 | 109 | 0   | 20  |
| 37 | 0  | 124 | 9  | 132 | 0   | 56  |
| 3  | 8  | 15  | 0  | 36  | 0   | 20  |
| 0  | 0  | 11  | 0  | 0   | 0   | 5   |
| 0  | 0  | 0   | 1  | 2   | 0   | 1   |
| 0  | 58 | 56  | 29 | 405 | 1   | 140 |
| 4  | 0  | 2   | 0  | 0   | 0   | 1   |
| 2  | 0  | 1   | 4  | 0   | 0   | 0   |
| 1  | 0  | 0   | 0  | 0   | 0   | 0   |
| 0  | 0  | 0   | 0  | 0   | 0   | 0   |
| 0  | 1  | 0   | 0  | 0   | 110 | 51  |

|    |     |     |     |     |      |     |
|----|-----|-----|-----|-----|------|-----|
| 50 | 0   | 82  | 22  | 117 | 0    | 31  |
| 23 | 0   | 57  | 2   | 21  | 0    | 38  |
| 17 | 0   | 4   | 2   | 29  | 0    | 23  |
| 4  | 0   | 5   | 0   | 12  | 0    | 3   |
| 0  | 0   | 0   | 0   | 0   | 0    | 0   |
| 1  | 0   | 0   | 0   | 1   | 0    | 0   |
| 46 | 39  | 50  | 816 | 450 | 1180 | 213 |
| 50 | 1   | 66  | 1   | 99  | 0    | 26  |
| 64 | 14  | 362 | 66  | 304 | 0    | 71  |
| 9  | 5   | 188 | 0   | 17  | 0    | 72  |
| 0  | 1   | 55  | 2   | 71  | 0    | 30  |
| 2  | 11  | 33  | 0   | 0   | 0    | 0   |
| 0  | 0   | 37  | 7   | 8   | 0    | 1   |
| 0  | 0   | 0   | 9   | 49  | 0    | 0   |
| 0  | 0   | 4   | 0   | 6   | 1    | 0   |
| 0  | 0   | 0   | 0   | 0   | 9    | 0   |
| 0  | 0   | 2   | 0   | 0   | 0    | 0   |
| 0  | 0   | 0   | 0   | 0   | 0    | 0   |
| 5  | 6   | 314 | 12  | 201 | 0    | 292 |
| 0  | 0   | 1   | 0   | 0   | 0    | 0   |
| 0  | 0   | 11  | 0   | 0   | 0    | 26  |
| 9  | 0   | 16  | 0   | 0   | 0    | 5   |
| 3  | 0   | 2   | 0   | 0   | 0    | 0   |
| 5  | 0   | 0   | 0   | 0   | 0    | 0   |
| 1  | 0   | 0   | 0   | 0   | 0    | 0   |
| 0  | 0   | 0   | 0   | 0   | 0    | 0   |
| 4  | 1   | 5   | 1   | 0   | 1    | 2   |
| 0  | 0   | 0   | 0   | 0   | 120  | 1   |
| 0  | 0   | 0   | 0   | 0   | 0    | 0   |
| 0  | 0   | 0   | 0   | 0   | 0    | 0   |
| 0  | 0   | 0   | 0   | 0   | 0    | 0   |
| 0  | 0   | 5   | 0   | 0   | 0    | 0   |
| 15 | 0   | 0   | 0   | 0   | 0    | 0   |
| 4  | 124 | 21  | 50  | 33  | 0    | 0   |
| 9  | 0   | 0   | 0   | 0   | 4    | 9   |
| 0  | 0   | 0   | 0   | 0   | 0    | 0   |
| 0  | 0   | 0   | 0   | 0   | 0    | 0   |
| 0  | 0   | 0   | 0   | 0   | 4    | 0   |
| 0  | 6   | 0   | 0   | 0   | 0    | 0   |
| 1  | 0   | 0   | 0   | 0   | 0    | 0   |
| 6  | 0   | 0   | 0   | 0   | 91   | 5   |
| 0  | 0   | 0   | 0   | 0   | 0    | 0   |
| 20 | 1   | 27  | 4   | 14  | 0    | 5   |
| 0  | 0   | 3   | 0   | 0   | 0    | 0   |
| 0  | 0   | 2   | 0   | 0   | 0    | 0   |
| 0  | 0   | 0   | 0   | 0   | 0    | 0   |
| 0  | 0   | 0   | 0   | 0   | 0    | 0   |
| 0  | 0   | 0   | 0   | 0   | 0    | 0   |

|     |     |      |     |     |     |     |
|-----|-----|------|-----|-----|-----|-----|
| 0   | 0   | 0    | 0   | 0   | 0   | 0   |
| 0   | 0   | 0    | 0   | 0   | 0   | 0   |
| 35  | 343 | 373  | 138 | 330 | 309 | 381 |
| 0   | 0   | 0    | 0   | 1   | 0   | 0   |
| 0   | 0   | 0    | 0   | 0   | 0   | 0   |
| 0   | 0   | 0    | 0   | 0   | 0   | 0   |
| 0   | 0   | 0    | 0   | 0   | 0   | 0   |
| 0   | 0   | 0    | 0   | 0   | 0   | 0   |
| 0   | 0   | 0    | 0   | 0   | 0   | 0   |
| 0   | 2   | 0    | 0   | 0   | 0   | 0   |
| 1   | 0   | 9    | 2   | 14  | 0   | 33  |
| 0   | 0   | 0    | 0   | 0   | 0   | 0   |
| 0   | 0   | 0    | 0   | 0   | 0   | 0   |
| 0   | 0   | 0    | 0   | 0   | 0   | 0   |
| 0   | 1   | 2    | 0   | 0   | 0   | 0   |
| 0   | 0   | 0    | 0   | 6   | 0   | 0   |
| 0   | 0   | 0    | 0   | 0   | 0   | 0   |
| 0   | 0   | 0    | 0   | 0   | 0   | 0   |
| 0   | 10  | 10   | 0   | 0   | 0   | 0   |
| 9   | 0   | 1    | 0   | 0   | 7   | 4   |
| 0   | 0   | 0    | 0   | 0   | 0   | 0   |
| 0   | 0   | 0    | 0   | 0   | 0   | 0   |
| 0   | 0   | 0    | 0   | 0   | 0   | 0   |
| 1   | 0   | 2    | 0   | 0   | 0   | 2   |
| 3   | 3   | 2    | 0   | 1   | 0   | 3   |
| 3   | 4   | 0    | 0   | 0   | 0   | 0   |
| 0   | 0   | 3    | 0   | 0   | 0   | 0   |
| 0   | 0   | 0    | 0   | 0   | 0   | 0   |
| 0   | 5   | 2    | 23  | 0   | 0   | 3   |
| 0   | 0   | 0    | 0   | 0   | 0   | 0   |
| 0   | 0   | 0    | 0   | 0   | 0   | 0   |
| 16  | 0   | 0    | 2   | 0   | 25  | 1   |
| 0   | 0   | 0    | 0   | 0   | 0   | 0   |
| 0   | 0   | 0    | 0   | 0   | 0   | 0   |
| 0   | 0   | 0    | 0   | 0   | 0   | 0   |
| 0   | 0   | 0    | 0   | 0   | 0   | 0   |
| 0   | 0   | 0    | 0   | 0   | 0   | 3   |
| 0   | 0   | 0    | 0   | 0   | 0   | 0   |
| 0   | 0   | 0    | 0   | 0   | 0   | 0   |
| 0   | 0   | 0    | 0   | 0   | 0   | 0   |
| 0   | 0   | 0    | 0   | 0   | 0   | 0   |
| 11  | 34  | 25   | 20  | 11  | 50  | 4   |
| 0   | 0   | 0    | 0   | 0   | 0   | 0   |
| 0   | 0   | 0    | 0   | 0   | 0   | 0   |
| 573 | 695 | 1051 | 519 | 290 | 760 | 503 |
| 30  | 41  | 7    | 114 | 37  | 5   | 29  |
| 522 | 664 | 366  | 305 | 476 | 42  | 22  |
| 197 | 615 | 380  | 182 | 548 | 39  | 126 |
| 46  | 343 | 63   | 242 | 74  | 416 | 36  |

|    |     |     |    |     |    |     |
|----|-----|-----|----|-----|----|-----|
| 25 | 86  | 84  | 10 | 2   | 9  | 1   |
| 93 | 206 | 100 | 59 | 17  | 60 | 193 |
| 9  | 20  | 9   | 12 | 1   | 3  | 1   |
| 3  | 12  | 0   | 14 | 11  | 5  | 0   |
| 2  | 26  | 16  | 9  | 29  | 0  | 6   |
| 2  | 22  | 15  | 15 | 21  | 3  | 0   |
| 2  | 18  | 0   | 32 | 0   | 11 | 0   |
| 10 | 19  | 38  | 0  | 3   | 0  | 16  |
| 6  | 4   | 9   | 0  | 5   | 4  | 0   |
| 8  | 0   | 0   | 0  | 0   | 1  | 0   |
| 3  | 1   | 8   | 0  | 3   | 1  | 1   |
| 5  | 15  | 15  | 3  | 0   | 4  | 2   |
| 0  | 0   | 4   | 3  | 0   | 0  | 0   |
| 0  | 13  | 15  | 14 | 6   | 4  | 1   |
| 1  | 41  | 0   | 0  | 0   | 0  | 0   |
| 4  | 4   | 5   | 3  | 0   | 3  | 0   |
| 0  | 0   | 11  | 0  | 0   | 2  | 0   |
| 4  | 35  | 43  | 19 | 112 | 1  | 46  |
| 8  | 0   | 0   | 0  | 0   | 67 | 5   |
| 3  | 0   | 0   | 0  | 0   | 1  | 0   |
| 0  | 0   | 9   | 0  | 0   | 0  | 0   |
| 1  | 4   | 0   | 42 | 0   | 0  | 0   |
| 0  | 0   | 0   | 0  | 0   | 0  | 0   |
| 0  | 0   | 0   | 0  | 0   | 0  | 0   |
| 0  | 0   | 2   | 0  | 0   | 0  | 0   |
| 0  | 2   | 2   | 0  | 8   | 4  | 22  |
| 1  | 0   | 1   | 1  | 0   | 0  | 3   |
| 0  | 6   | 3   | 0  | 0   | 0  | 0   |
| 0  | 0   | 3   | 0  | 0   | 0  | 17  |
| 1  | 0   | 0   | 0  | 0   | 0  | 0   |
| 0  | 0   | 0   | 0  | 0   | 0  | 15  |
| 0  | 0   | 2   | 0  | 0   | 0  | 2   |
| 23 | 1   | 0   | 0  | 0   | 0  | 0   |
| 0  | 0   | 0   | 0  | 1   | 1  | 2   |
| 0  | 0   | 0   | 0  | 0   | 0  | 0   |
| 0  | 0   | 0   | 7  | 1   | 1  | 1   |
| 0  | 0   | 0   | 0  | 0   | 0  | 0   |
| 0  | 0   | 0   | 0  | 0   | 0  | 0   |
| 0  | 1   | 0   | 0  | 0   | 0  | 0   |
| 0  | 0   | 0   | 0  | 0   | 0  | 0   |
| 0  | 0   | 0   | 0  | 0   | 0  | 0   |
| 0  | 0   | 0   | 0  | 0   | 0  | 0   |
| 0  | 2   | 0   | 0  | 0   | 3  | 2   |
| 0  | 0   | 0   | 0  | 0   | 0  | 0   |
| 0  | 0   | 0   | 0  | 0   | 0  | 0   |
| 0  | 0   | 0   | 0  | 0   | 0  | 0   |
| 0  | 0   | 0   | 0  | 0   | 0  | 0   |
| 0  | 0   | 0   | 2  | 9   | 0  | 0   |
| 0  | 4   | 0   | 0  | 0   | 0  | 0   |
| 0  | 0   | 0   | 0  | 9   | 0  | 0   |

|     |     |     |     |     |     |     |
|-----|-----|-----|-----|-----|-----|-----|
| 0   | 0   | 0   | 2   | 0   | 1   | 0   |
| 0   | 0   | 0   | 0   | 0   | 1   | 0   |
| 0   | 0   | 0   | 3   | 0   | 0   | 0   |
| 0   | 0   | 0   | 3   | 0   | 0   | 0   |
| 0   | 0   | 0   | 0   | 0   | 0   | 0   |
| 7   | 9   | 4   | 25  | 24  | 66  | 1   |
| 0   | 0   | 0   | 0   | 0   | 0   | 0   |
| 113 | 5   | 302 | 238 | 540 | 142 | 251 |
| 0   | 0   | 1   | 1   | 1   | 0   | 0   |
| 0   | 0   | 0   | 0   | 0   | 0   | 0   |
| 0   | 0   | 0   | 0   | 0   | 0   | 1   |
| 0   | 0   | 0   | 0   | 0   | 0   | 0   |
| 3   | 0   | 0   | 0   | 2   | 0   | 38  |
| 0   | 0   | 0   | 0   | 0   | 0   | 0   |
| 1   | 0   | 0   | 0   | 0   | 0   | 0   |
| 0   | 0   | 0   | 0   | 0   | 0   | 0   |
| 1   | 0   | 0   | 0   | 0   | 0   | 0   |
| 8   | 0   | 0   | 0   | 0   | 29  | 525 |
| 0   | 0   | 0   | 8   | 0   | 76  | 4   |
| 0   | 0   | 0   | 0   | 0   | 75  | 0   |
| 0   | 0   | 0   | 0   | 0   | 0   | 0   |
| 0   | 0   | 0   | 0   | 0   | 0   | 0   |
| 0   | 0   | 0   | 0   | 0   | 35  | 1   |
| 0   | 0   | 0   | 0   | 0   | 0   | 0   |
| 0   | 0   | 0   | 0   | 0   | 0   | 0   |
| 0   | 0   | 0   | 0   | 0   | 0   | 0   |
| 0   | 0   | 0   | 0   | 0   | 3   | 0   |
| 0   | 0   | 0   | 0   | 0   | 0   | 0   |
| 0   | 0   | 0   | 0   | 0   | 0   | 0   |
| 8   | 1   | 5   | 0   | 0   | 0   | 3   |
| 2   | 40  | 23  | 16  | 10  | 6   | 0   |
| 3   | 0   | 0   | 0   | 0   | 0   | 0   |
| 0   | 0   | 0   | 0   | 0   | 0   | 0   |
| 0   | 0   | 0   | 0   | 0   | 0   | 0   |
| 0   | 18  | 18  | 0   | 0   | 0   | 0   |
| 1   | 7   | 7   | 0   | 14  | 0   | 0   |
| 88  | 164 | 52  | 944 | 372 | 395 | 32  |
| 0   | 0   | 0   | 0   | 0   | 0   | 0   |
| 4   | 0   | 0   | 0   | 0   | 0   | 0   |
| 0   | 0   | 0   | 0   | 0   | 0   | 0   |
| 0   | 0   | 0   | 0   | 6   | 0   | 0   |
| 0   | 0   | 0   | 3   | 0   | 1   | 0   |
| 0   | 0   | 0   | 0   | 0   | 0   | 0   |
| 0   | 0   | 0   | 0   | 0   | 0   | 0   |
| 9   | 0   | 0   | 0   | 0   | 100 | 1   |
| 0   | 0   | 0   | 0   | 0   | 0   | 0   |
| 0   | 0   | 0   | 0   | 0   | 0   | 0   |
| 0   | 1   | 3   | 0   | 0   | 29  | 0   |





|     |     |     |     |    |     |     |
|-----|-----|-----|-----|----|-----|-----|
| 0   | 0   | 0   | 0   | 0  | 0   | 0   |
| 196 | 70  | 97  | 115 | 15 | 680 | 121 |
| 37  | 10  | 13  | 72  | 6  | 119 | 49  |
| 21  | 36  | 41  | 168 | 70 | 84  | 2   |
| 3   | 0   | 0   | 0   | 0  | 0   | 0   |
| 0   | 8   | 0   | 0   | 0  | 0   | 0   |
| 0   | 4   | 3   | 0   | 2  | 3   | 0   |
| 9   | 0   | 0   | 0   | 0  | 0   | 0   |
| 0   | 0   | 0   | 0   | 0  | 0   | 0   |
| 18  | 3   | 6   | 9   | 0  | 25  | 6   |
| 0   | 3   | 5   | 0   | 4  | 0   | 6   |
| 0   | 0   | 0   | 0   | 0  | 0   | 0   |
| 0   | 0   | 0   | 0   | 0  | 0   | 0   |
| 0   | 3   | 2   | 0   | 0  | 0   | 0   |
| 5   | 6   | 13  | 0   | 0  | 0   | 0   |
| 4   | 0   | 1   | 0   | 0  | 0   | 2   |
| 2   | 0   | 0   | 0   | 3  | 0   | 0   |
| 0   | 0   | 0   | 12  | 0  | 0   | 0   |
| 0   | 0   | 0   | 0   | 0  | 0   | 0   |
| 5   | 1   | 1   | 6   | 3  | 0   | 0   |
| 5   | 1   | 2   | 0   | 6  | 0   | 0   |
| 0   | 0   | 1   | 0   | 0  | 0   | 4   |
| 0   | 0   | 0   | 0   | 0  | 0   | 0   |
| 0   | 0   | 3   | 0   | 2  | 3   | 2   |
| 0   | 0   | 0   | 0   | 0  | 0   | 0   |
| 6   | 0   | 0   | 0   | 0  | 0   | 0   |
| 0   | 0   | 0   | 0   | 0  | 0   | 0   |
| 0   | 0   | 0   | 0   | 0  | 0   | 0   |
| 0   | 0   | 0   | 0   | 0  | 0   | 2   |
| 0   | 0   | 0   | 0   | 0  | 0   | 0   |
| 0   | 0   | 0   | 0   | 0  | 0   | 0   |
| 4   | 0   | 0   | 0   | 0  | 0   | 0   |
| 3   | 0   | 8   | 0   | 0  | 0   | 0   |
| 16  | 31  | 18  | 5   | 0  | 201 | 15  |
| 20  | 132 | 77  | 3   | 0  | 32  | 19  |
| 60  | 0   | 41  | 36  | 72 | 206 | 137 |
| 84  | 1   | 2   | 10  | 0  | 170 | 8   |
| 10  | 4   | 5   | 0   | 0  | 0   | 0   |
| 16  | 22  | 52  | 22  | 42 | 6   | 30  |
| 56  | 103 | 103 | 27  | 68 | 28  | 23  |
| 0   | 16  | 5   | 0   | 0  | 18  | 10  |
| 30  | 0   | 4   | 2   | 0  | 38  | 1   |
| 0   | 123 | 74  | 0   | 21 | 1   | 4   |
| 9   | 2   | 13  | 2   | 44 | 3   | 39  |
| 7   | 4   | 3   | 0   | 3  | 1   | 0   |
| 15  | 13  | 58  | 6   | 0  | 12  | 3   |
| 5   | 0   | 1   | 0   | 15 | 0   | 0   |
| 8   | 0   | 3   | 0   | 11 | 0   | 28  |



|      |      |      |      |       |     |      |
|------|------|------|------|-------|-----|------|
| 273  | 1978 | 2246 | 2420 | 13183 | 253 | 1085 |
| 57   | 13   | 28   | 7    | 215   | 126 | 202  |
| 0    | 0    | 0    | 0    | 0     | 0   | 0    |
| 0    | 0    | 0    | 0    | 0     | 0   | 0    |
| 4    | 0    | 1    | 0    | 4     | 0   | 0    |
| 0    | 1    | 0    | 0    | 1     | 0   | 0    |
| 0    | 0    | 0    | 0    | 0     | 0   | 0    |
| 0    | 0    | 0    | 0    | 0     | 0   | 0    |
| 0    | 0    | 0    | 1    | 1     | 0   | 0    |
| 0    | 0    | 0    | 0    | 0     | 0   | 0    |
| 0    | 0    | 0    | 0    | 0     | 0   | 0    |
| 0    | 0    | 0    | 0    | 0     | 0   | 0    |
| 5    | 9    | 11   | 2    | 18    | 2   | 26   |
| 0    | 126  | 198  | 0    | 12    | 0   | 3    |
| 313  | 1    | 0    | 2    | 6     | 413 | 339  |
| 0    | 0    | 0    | 0    | 0     | 0   | 0    |
| 0    | 0    | 0    | 0    | 0     | 0   | 0    |
| 0    | 0    | 0    | 0    | 0     | 0   | 0    |
| 0    | 0    | 0    | 0    | 0     | 0   | 0    |
| 59   | 17   | 14   | 6    | 5     | 86  | 17   |
| 37   | 1    | 4    | 1    | 1     | 1   | 0    |
| 0    | 0    | 0    | 0    | 0     | 0   | 0    |
| 0    | 0    | 1    | 0    | 0     | 0   | 0    |
| 5    | 0    | 0    | 0    | 2     | 0   | 0    |
| 4909 | 26   | 13   | 135  | 49    | 202 | 51   |
| 0    | 0    | 0    | 0    | 0     | 0   | 0    |
| 2    | 0    | 0    | 0    | 0     | 0   | 0    |
| 682  | 19   | 17   | 112  | 45    | 56  | 4    |
| 0    | 23   | 30   | 51   | 17    | 10  | 21   |
| 390  | 37   | 44   | 184  | 29    | 105 | 67   |
| 114  | 0    | 4    | 72   | 31    | 99  | 16   |
| 500  | 63   | 36   | 1    | 2     | 0   | 2    |
| 10   | 27   | 39   | 98   | 12    | 37  | 24   |
| 0    | 6    | 8    | 82   | 145   | 2   | 3    |
| 27   | 89   | 67   | 117  | 3     | 10  | 1    |
| 2    | 0    | 4    | 8    | 2     | 5   | 3    |
| 153  | 11   | 5    | 10   | 12    | 0   | 0    |
| 0    | 0    | 0    | 0    | 0     | 0   | 0    |
| 1    | 0    | 0    | 0    | 0     | 0   | 0    |
| 0    | 0    | 0    | 0    | 0     | 0   | 0    |
| 0    | 0    | 0    | 0    | 0     | 0   | 0    |
| 0    | 0    | 0    | 0    | 0     | 0   | 0    |
| 0    | 0    | 0    | 0    | 0     | 0   | 0    |
| 51   | 85   | 3    | 184  | 32    | 109 | 86   |
| 1154 | 88   | 35   | 13   | 69    | 10  | 9    |
| 0    | 0    | 2    | 0    | 0     | 0   | 0    |
| 3    | 0    | 0    | 14   | 5     | 45  | 5    |
| 1    | 0    | 0    | 0    | 0     | 0   | 0    |

|      |      |      |      |      |      |      |
|------|------|------|------|------|------|------|
| 1    | 0    | 0    | 0    | 0    | 0    | 0    |
| 0    | 0    | 0    | 0    | 0    | 0    | 0    |
| 2    | 0    | 0    | 0    | 0    | 0    | 0    |
| 8    | 0    | 0    | 0    | 0    | 0    | 0    |
| 0    | 0    | 0    | 0    | 0    | 0    | 0    |
| 0    | 0    | 0    | 0    | 0    | 0    | 0    |
| 0    | 0    | 0    | 0    | 0    | 0    | 0    |
| 0    | 0    | 2    | 0    | 0    | 1    | 3    |
| 0    | 0    | 0    | 0    | 0    | 0    | 0    |
| 2    | 0    | 20   | 245  | 726  | 3    | 109  |
| 0    | 0    | 4    | 0    | 14   | 0    | 0    |
| 6    | 0    | 12   | 1    | 1    | 0    | 0    |
| 0    | 0    | 2    | 0    | 5    | 0    | 0    |
| 0    | 0    | 0    | 0    | 0    | 0    | 0    |
| 0    | 0    | 0    | 0    | 0    | 0    | 0    |
| 5743 | 354  | 195  | 1558 | 1777 | 293  | 58   |
| 2    | 101  | 210  | 710  | 990  | 404  | 148  |
| 69   | 6    | 3    | 53   | 78   | 9    | 2    |
| 0    | 0    | 0    | 28   | 2    | 7    | 0    |
| 4    | 0    | 0    | 10   | 1    | 1    | 0    |
| 5    | 1    | 1    | 2    | 2    | 0    | 0    |
| 1    | 1    | 0    | 1    | 2    | 0    | 0    |
| 4    | 0    | 0    | 5    | 3    | 2    | 0    |
| 1    | 0    | 1    | 1    | 2    | 0    | 0    |
| 6    | 3    | 3    | 2    | 9    | 1    | 0    |
| 30   | 3    | 1    | 20   | 27   | 8    | 0    |
| 1    | 0    | 1    | 1    | 0    | 0    | 0    |
| 0    | 0    | 0    | 0    | 0    | 0    | 0    |
| 52   | 20   | 14   | 28   | 10   | 29   | 4    |
| 257  | 19   | 13   | 30   | 9    | 16   | 9    |
| 419  | 49   | 44   | 115  | 85   | 8    | 7    |
| 73   | 15   | 5    | 64   | 59   | 33   | 4    |
| 190  | 23   | 19   | 50   | 7    | 42   | 3    |
| 0    | 0    | 0    | 0    | 0    | 0    | 0    |
| 0    | 0    | 0    | 0    | 0    | 0    | 0    |
| 0    | 0    | 0    | 0    | 0    | 0    | 0    |
| 0    | 0    | 0    | 0    | 0    | 1    | 0    |
| 0    | 0    | 0    | 1    | 0    | 1    | 0    |
| 1206 | 1626 | 1031 | 1017 | 2682 | 1002 | 1729 |
| 1    | 25   | 255  | 42   | 808  | 34   | 452  |
| 52   | 3    | 138  | 193  | 768  | 173  | 424  |
| 75   | 3    | 77   | 30   | 923  | 9    | 390  |
| 1    | 26   | 70   | 44   | 177  | 5    | 18   |
| 0    | 0    | 1    | 0    | 0    | 0    | 5    |
| 0    | 0    | 0    | 0    | 38   | 0    | 11   |
| 1    | 0    | 2    | 0    | 5    | 0    | 5    |
| 0    | 0    | 6    | 1    | 8    | 0    | 14   |
| 0    | 0    | 0    | 0    | 0    | 0    | 0    |

|     |     |     |    |     |     |     |
|-----|-----|-----|----|-----|-----|-----|
| 0   | 0   | 0   | 0  | 0   | 0   | 0   |
| 0   | 1   | 0   | 0  | 0   | 2   | 0   |
| 0   | 0   | 0   | 0  | 0   | 0   | 0   |
| 0   | 0   | 0   | 0  | 0   | 0   | 0   |
| 1   | 0   | 1   | 0  | 0   | 0   | 0   |
| 0   | 0   | 0   | 0  | 0   | 0   | 0   |
| 0   | 0   | 1   | 0  | 0   | 0   | 1   |
| 0   | 0   | 1   | 0  | 0   | 0   | 3   |
| 0   | 0   | 0   | 3  | 0   | 0   | 0   |
| 0   | 3   | 2   | 0  | 2   | 1   | 1   |
| 0   | 0   | 0   | 0  | 1   | 0   | 0   |
| 0   | 0   | 0   | 0  | 0   | 0   | 0   |
| 0   | 0   | 0   | 0  | 0   | 0   | 0   |
| 0   | 0   | 0   | 0  | 0   | 0   | 0   |
| 0   | 0   | 0   | 0  | 0   | 0   | 0   |
| 0   | 0   | 0   | 0  | 0   | 0   | 0   |
| 0   | 0   | 0   | 0  | 0   | 0   | 0   |
| 9   | 30  | 33  | 5  | 26  | 2   | 0   |
| 6   | 1   | 0   | 0  | 0   | 0   | 0   |
| 120 | 23  | 7   | 51 | 111 | 0   | 1   |
| 0   | 0   | 0   | 1  | 0   | 1   | 0   |
| 9   | 14  | 1   | 0  | 1   | 5   | 0   |
| 0   | 0   | 0   | 0  | 0   | 52  | 14  |
| 0   | 0   | 0   | 0  | 7   | 0   | 0   |
| 0   | 0   | 0   | 0  | 0   | 0   | 0   |
| 0   | 0   | 0   | 0  | 0   | 0   | 0   |
| 101 | 205 | 164 | 89 | 98  | 93  | 83  |
| 0   | 109 | 25  | 3  | 6   | 0   | 0   |
| 0   | 0   | 1   | 0  | 29  | 0   | 0   |
| 0   | 0   | 0   | 0  | 0   | 0   | 0   |
| 0   | 0   | 0   | 0  | 0   | 0   | 9   |
| 6   | 3   | 393 | 11 | 195 | 0   | 317 |
| 5   | 1   | 23  | 2  | 10  | 486 | 36  |
| 0   | 0   | 0   | 0  | 0   | 64  | 7   |
| 0   | 0   | 7   | 0  | 0   | 0   | 0   |
| 26  | 0   | 0   | 0  | 0   | 0   | 0   |
| 0   | 0   | 0   | 0  | 0   | 0   | 0   |
| 1   | 0   | 0   | 0  | 0   | 0   | 0   |
| 0   | 0   | 0   | 0  | 0   | 0   | 0   |
| 0   | 0   | 1   | 6  | 1   | 2   | 0   |
| 0   | 0   | 0   | 0  | 0   | 0   | 0   |
| 0   | 2   | 0   | 0  | 0   | 0   | 0   |
| 0   | 0   | 0   | 0  | 0   | 3   | 1   |
| 1   | 0   | 0   | 0  | 0   | 1   | 0   |
| 26  | 9   | 10  | 0  | 0   | 0   | 0   |
| 3   | 0   | 0   | 12 | 1   | 2   | 0   |
| 0   | 0   | 2   | 0  | 0   | 0   | 3   |
| 1   | 1   | 0   | 0  | 0   | 0   | 0   |
| 0   | 0   | 11  | 0  | 0   | 0   | 0   |

|      |      |      |      |     |      |     |
|------|------|------|------|-----|------|-----|
| 0    | 0    | 0    | 0    | 0   | 0    | 0   |
| 0    | 0    | 0    | 0    | 0   | 0    | 0   |
| 1308 | 1784 | 1093 | 1009 | 386 | 1720 | 439 |
| 45   | 38   | 28   | 84   | 4   | 133  | 5   |
| 293  | 166  | 218  | 390  | 318 | 1223 | 215 |
| 162  | 6    | 155  | 5    | 39  | 0    | 55  |
| 19   | 20   | 32   | 47   | 87  | 133  | 12  |
| 342  | 50   | 622  | 75   | 942 | 13   | 447 |
| 1    | 1    | 78   | 10   | 64  | 2    | 39  |
| 39   | 38   | 13   | 94   | 3   | 19   | 0   |
| 536  | 0    | 17   | 95   | 80  | 457  | 24  |
| 1    | 0    | 98   | 4    | 67  | 0    | 10  |
| 36   | 65   | 62   | 57   | 68  | 11   | 30  |
| 11   | 21   | 2    | 103  | 24  | 422  | 44  |
| 14   | 61   | 135  | 25   | 120 | 66   | 24  |
| 5    | 209  | 148  | 106  | 48  | 89   | 1   |
| 3    | 0    | 77   | 3    | 21  | 0    | 5   |
| 0    | 9    | 6    | 0    | 0   | 0    | 0   |
| 34   | 106  | 62   | 55   | 8   | 34   | 3   |
| 0    | 2    | 34   | 0    | 0   | 0    | 0   |
| 0    | 0    | 9    | 0    | 7   | 0    | 0   |
| 1    | 0    | 0    | 0    | 18  | 0    | 16  |
| 6    | 1    | 18   | 28   | 60  | 92   | 1   |
| 75   | 12   | 91   | 59   | 120 | 45   | 29  |
| 23   | 26   | 23   | 7    | 0   | 3    | 3   |
| 64   | 71   | 73   | 5    | 5   | 0    | 3   |
| 0    | 0    | 22   | 10   | 44  | 6    | 24  |
| 71   | 0    | 0    | 7    | 0   | 0    | 0   |
| 1    | 1    | 25   | 3    | 45  | 0    | 15  |
| 6    | 0    | 7    | 0    | 0   | 0    | 13  |
| 0    | 1    | 5    | 19   | 24  | 31   | 1   |
| 0    | 0    | 116  | 1    | 9   | 0    | 9   |
| 0    | 0    | 1    | 0    | 0   | 0    | 0   |
| 0    | 0    | 19   | 0    | 0   | 0    | 0   |
| 11   | 1    | 67   | 0    | 10  | 0    | 3   |
| 16   | 0    | 2    | 3    | 17  | 1    | 8   |
| 7    | 3    | 20   | 1    | 78  | 0    | 44  |
| 0    | 0    | 0    | 0    | 13  | 0    | 0   |
| 0    | 0    | 2    | 1    | 34  | 0    | 11  |
| 6    | 0    | 26   | 0    | 4   | 0    | 3   |
| 0    | 0    | 0    | 0    | 0   | 0    | 0   |
| 0    | 0    | 36   | 0    | 4   | 0    | 5   |
| 0    | 0    | 1    | 0    | 0   | 0    | 0   |
| 0    | 0    | 1    | 5    | 29  | 0    | 0   |
| 0    | 0    | 1    | 0    | 0   | 0    | 0   |
| 81   | 0    | 3    | 0    | 1   | 0    | 1   |
| 0    | 0    | 0    | 0    | 23  | 0    | 24  |
| 0    | 0    | 5    | 0    | 11  | 0    | 0   |

|    |    |    |    |    |     |    |
|----|----|----|----|----|-----|----|
| 2  | 0  | 0  | 0  | 0  | 0   | 0  |
| 1  | 0  | 11 | 0  | 6  | 0   | 7  |
| 3  | 3  | 4  | 0  | 0  | 1   | 2  |
| 0  | 0  | 0  | 4  | 0  | 0   | 0  |
| 0  | 0  | 0  | 0  | 0  | 0   | 0  |
| 0  | 0  | 1  | 0  | 0  | 0   | 5  |
| 0  | 0  | 0  | 0  | 0  | 0   | 0  |
| 31 | 0  | 0  | 0  | 0  | 0   | 0  |
| 3  | 2  | 12 | 0  | 0  | 2   | 0  |
| 5  | 0  | 3  | 0  | 10 | 0   | 1  |
| 0  | 2  | 0  | 0  | 0  | 3   | 1  |
| 18 | 0  | 0  | 0  | 0  | 0   | 0  |
| 32 | 0  | 0  | 0  | 0  | 0   | 0  |
| 0  | 0  | 4  | 0  | 0  | 0   | 0  |
| 4  | 0  | 19 | 0  | 0  | 0   | 0  |
| 11 | 0  | 0  | 0  | 0  | 0   | 0  |
| 0  | 0  | 4  | 0  | 0  | 0   | 0  |
| 15 | 0  | 0  | 0  | 0  | 0   | 3  |
| 0  | 0  | 0  | 0  | 0  | 0   | 0  |
| 0  | 0  | 0  | 0  | 0  | 0   | 10 |
| 6  | 0  | 0  | 0  | 0  | 0   | 0  |
| 0  | 0  | 0  | 0  | 0  | 0   | 4  |
| 6  | 0  | 0  | 0  | 0  | 0   | 0  |
| 0  | 0  | 0  | 0  | 0  | 0   | 0  |
| 6  | 0  | 0  | 0  | 0  | 0   | 0  |
| 4  | 0  | 4  | 0  | 0  | 0   | 0  |
| 0  | 0  | 1  | 0  | 0  | 0   | 0  |
| 0  | 0  | 0  | 0  | 7  | 0   | 1  |
| 0  | 0  | 0  | 0  | 2  | 0   | 4  |
| 0  | 0  | 0  | 0  | 0  | 0   | 0  |
| 0  | 0  | 2  | 0  | 0  | 0   | 0  |
| 5  | 0  | 0  | 0  | 0  | 0   | 0  |
| 1  | 0  | 0  | 0  | 0  | 0   | 0  |
| 0  | 0  | 0  | 0  | 0  | 0   | 0  |
| 1  | 2  | 1  | 0  | 0  | 0   | 0  |
| 0  | 0  | 0  | 0  | 0  | 0   | 0  |
| 0  | 0  | 0  | 0  | 0  | 0   | 0  |
| 0  | 0  | 0  | 0  | 0  | 0   | 0  |
| 0  | 0  | 0  | 0  | 0  | 1   | 0  |
| 5  | 0  | 0  | 0  | 1  | 0   | 0  |
| 2  | 0  | 0  | 0  | 0  | 0   | 0  |
| 0  | 0  | 4  | 0  | 0  | 0   | 0  |
| 0  | 0  | 0  | 0  | 0  | 0   | 0  |
| 0  | 0  | 0  | 0  | 0  | 0   | 0  |
| 4  | 9  | 38 | 35 | 24 | 231 | 20 |
| 2  | 1  | 8  | 0  | 5  | 0   | 0  |
| 0  | 12 | 1  | 30 | 42 | 20  | 33 |
| 0  | 0  | 0  | 1  | 0  | 6   | 0  |

|      |      |      |      |      |      |      |
|------|------|------|------|------|------|------|
| 31   | 0    | 0    | 0    | 0    | 0    | 0    |
| 0    | 0    | 0    | 0    | 0    | 0    | 1    |
| 0    | 0    | 0    | 0    | 0    | 0    | 0    |
| 4    | 35   | 16   | 8    | 4    | 5    | 3    |
| 0    | 0    | 0    | 0    | 0    | 0    | 0    |
| 1    | 0    | 0    | 0    | 0    | 17   | 0    |
| 0    | 0    | 0    | 0    | 0    | 0    | 0    |
| 0    | 0    | 0    | 0    | 0    | 0    | 0    |
| 122  | 111  | 171  | 21   | 57   | 389  | 86   |
| 1718 | 1446 | 1238 | 1399 | 2957 | 3563 | 1549 |
| 57   | 10   | 2    | 27   | 1    | 90   | 12   |
| 7    | 7    | 1    | 1    | 0    | 121  | 16   |
| 61   | 150  | 155  | 158  | 34   | 212  | 37   |
| 18   | 1    | 1    | 14   | 0    | 231  | 5    |
| 9    | 0    | 2    | 0    | 7    | 0    | 27   |
| 25   | 3    | 7    | 14   | 5    | 10   | 9    |
| 22   | 38   | 59   | 52   | 3    | 188  | 85   |
| 4    | 0    | 0    | 9    | 3    | 211  | 5    |
| 0    | 7    | 3    | 0    | 0    | 0    | 0    |
| 39   | 6    | 8    | 0    | 13   | 4    | 19   |
| 7    | 3    | 6    | 6    | 0    | 1    | 2    |
| 4    | 9    | 16   | 1    | 5    | 2    | 1    |
| 0    | 4    | 7    | 15   | 1    | 4    | 0    |
| 0    | 0    | 0    | 0    | 0    | 0    | 0    |
| 0    | 8    | 5    | 1    | 0    | 2    | 0    |
| 2    | 0    | 1    | 0    | 2    | 3    | 8    |
| 1    | 0    | 0    | 1    | 0    | 0    | 0    |
| 18   | 4    | 5    | 2    | 5    | 7    | 2    |
| 3    | 0    | 1    | 1    | 5    | 1    | 1    |
| 0    | 0    | 0    | 0    | 0    | 0    | 0    |
| 2    | 1    | 0    | 1    | 0    | 9    | 0    |
| 0    | 1    | 0    | 0    | 0    | 0    | 0    |
| 2    | 1    | 1    | 4    | 7    | 2    | 5    |
| 0    | 0    | 0    | 1    | 20   | 0    | 5    |
| 0    | 0    | 0    | 0    | 0    | 0    | 0    |
| 0    | 0    | 0    | 0    | 0    | 0    | 0    |
| 3    | 0    | 1    | 2    | 1    | 0    | 0    |
| 3    | 0    | 0    | 3    | 5    | 0    | 2    |
| 0    | 0    | 2    | 0    | 0    | 0    | 0    |
| 56   | 0    | 0    | 1    | 0    | 0    | 0    |
| 0    | 0    | 0    | 0    | 0    | 0    | 1    |
| 0    | 0    | 0    | 0    | 0    | 0    | 0    |
| 0    | 1    | 22   | 0    | 0    | 0    | 0    |
| 0    | 0    | 0    | 0    | 0    | 0    | 0    |
| 1    | 0    | 0    | 0    | 0    | 0    | 0    |
| 0    | 0    | 0    | 0    | 0    | 4    | 0    |
| 0    | 0    | 0    | 0    | 0    | 2    | 0    |
| 0    | 0    | 0    | 6    | 8    | 0    | 0    |





|     |     |     |     |     |     |    |
|-----|-----|-----|-----|-----|-----|----|
| 0   | 0   | 0   | 0   | 0   | 0   | 0  |
| 105 | 135 | 117 | 346 | 88  | 378 | 34 |
| 59  | 21  | 98  | 35  | 113 | 38  | 80 |
| 26  | 36  | 31  | 58  | 15  | 200 | 13 |
| 11  | 81  | 74  | 90  | 5   | 221 | 12 |
| 33  | 16  | 25  | 4   | 6   | 2   | 0  |
| 30  | 35  | 15  | 15  | 3   | 4   | 0  |
| 22  | 5   | 0   | 0   | 0   | 59  | 4  |
| 5   | 5   | 8   | 4   | 1   | 11  | 4  |
| 30  | 12  | 44  | 19  | 48  | 11  | 47 |
| 0   | 1   | 5   | 41  | 11  | 6   | 1  |
| 0   | 6   | 10  | 1   | 3   | 0   | 4  |
| 0   | 1   | 0   | 1   | 0   | 0   | 1  |
| 0   | 0   | 0   | 0   | 0   | 0   | 0  |
| 0   | 0   | 0   | 0   | 1   | 0   | 0  |
| 0   | 0   | 0   | 0   | 0   | 0   | 0  |
| 3   | 4   | 6   | 4   | 4   | 8   | 1  |
| 5   | 0   | 1   | 2   | 3   | 1   | 0  |
| 0   | 0   | 1   | 0   | 0   | 0   | 0  |
| 1   | 0   | 0   | 0   | 1   | 0   | 0  |
| 0   | 0   | 1   | 0   | 4   | 0   | 14 |
| 0   | 0   | 0   | 1   | 0   | 1   | 0  |
| 0   | 0   | 1   | 4   | 0   | 1   | 2  |
| 0   | 0   | 1   | 0   | 0   | 0   | 0  |
| 0   | 0   | 0   | 0   | 0   | 0   | 0  |
| 0   | 0   | 0   | 0   | 0   | 0   | 1  |
| 0   | 0   | 0   | 0   | 0   | 0   | 0  |
| 5   | 0   | 0   | 1   | 0   | 0   | 0  |
| 0   | 1   | 0   | 1   | 0   | 0   | 0  |
| 0   | 0   | 0   | 0   | 0   | 0   | 0  |
| 0   | 0   | 0   | 0   | 0   | 0   | 0  |
| 0   | 0   | 0   | 0   | 0   | 0   | 0  |
| 0   | 0   | 0   | 0   | 0   | 0   | 0  |
| 0   | 0   | 0   | 0   | 0   | 0   | 0  |
| 0   | 1   | 0   | 0   | 0   | 0   | 0  |
| 0   | 0   | 0   | 0   | 0   | 0   | 0  |
| 0   | 0   | 0   | 0   | 0   | 0   | 0  |
| 59  | 113 | 65  | 293 | 5   | 91  | 1  |
| 7   | 15  | 17  | 131 | 44  | 38  | 7  |
| 4   | 5   | 4   | 155 | 27  | 30  | 0  |
| 0   | 0   | 0   | 0   | 0   | 0   | 0  |
| 7   | 3   | 5   | 53  | 0   | 10  | 0  |
| 0   | 0   | 0   | 1   | 144 | 0   | 90 |
| 8   | 0   | 0   | 0   | 0   | 0   | 0  |
| 12  | 3   | 4   | 0   | 0   | 1   | 0  |
| 0   | 0   | 0   | 0   | 0   | 0   | 0  |
| 0   | 0   | 0   | 0   | 0   | 0   | 0  |
| 0   | 0   | 0   | 0   | 0   | 0   | 0  |
| 0   | 0   | 0   | 0   | 0   | 0   | 0  |





|     |     |      |    |     |    |     |
|-----|-----|------|----|-----|----|-----|
| 19  | 0   | 55   | 1  | 47  | 0  | 46  |
| 0   | 0   | 0    | 0  | 0   | 0  | 0   |
| 3   | 0   | 0    | 0  | 0   | 0  | 0   |
| 3   | 185 | 388  | 19 | 11  | 0  | 9   |
| 0   | 0   | 0    | 0  | 0   | 5  | 0   |
| 0   | 0   | 0    | 0  | 0   | 0  | 0   |
| 32  | 28  | 9    | 6  | 18  | 37 | 18  |
| 0   | 0   | 0    | 0  | 0   | 0  | 0   |
| 0   | 0   | 1    | 0  | 1   | 0  | 2   |
| 0   | 0   | 0    | 6  | 0   | 0  | 0   |
| 3   | 0   | 1    | 0  | 0   | 0  | 3   |
| 3   | 0   | 0    | 0  | 0   | 0  | 8   |
| 2   | 1   | 20   | 1  | 13  | 0  | 24  |
| 0   | 0   | 0    | 0  | 0   | 0  | 0   |
| 222 | 52  | 2448 | 11 | 154 | 0  | 400 |
| 1   | 0   | 5    | 0  | 1   | 0  | 5   |
| 0   | 0   | 0    | 0  | 0   | 0  | 1   |
| 0   | 0   | 0    | 0  | 0   | 0  | 0   |
| 0   | 0   | 3    | 0  | 0   | 0  | 5   |
| 0   | 0   | 0    | 0  | 13  | 0  | 4   |
| 0   | 0   | 0    | 0  | 0   | 0  | 0   |
| 0   | 0   | 0    | 0  | 0   | 0  | 0   |
| 1   | 0   | 21   | 0  | 0   | 0  | 2   |
| 0   | 0   | 0    | 0  | 0   | 0  | 0   |
| 0   | 0   | 1    | 0  | 0   | 0  | 0   |
| 2   | 0   | 2    | 0  | 0   | 0  | 0   |
| 0   | 0   | 2    | 0  | 4   | 0  | 6   |

| 124.SUR | 124.DCM | 125.SUR | 125.DCM |
|---------|---------|---------|---------|
| 0       | 0       | 0       | 0       |
| 0       | 39      | 0       | 8       |
| 0       | 6       | 0       | 0       |
| 0       | 6       | 0       | 2       |
| 0       | 0       | 0       | 0       |
| 0       | 3       | 0       | 0       |
| 0       | 0       | 0       | 0       |
| 0       | 24      | 11      | 11      |
| 0       | 7       | 0       | 2       |
| 0       | 0       | 0       | 0       |
| 0       | 2       | 0       | 2       |
| 0       | 0       | 0       | 0       |
| 0       | 0       | 0       | 0       |
| 0       | 0       | 0       | 10      |
| 0       | 0       | 0       | 0       |
| 3       | 0       | 1       | 0       |
| 4       | 408     | 3       | 114     |
| 726     | 165     | 557     | 59      |
| 0       | 3       | 518     | 0       |
| 12      | 2       | 4       | 10      |
| 13      | 5       | 0       | 0       |
| 0       | 0       | 0       | 0       |
| 0       | 0       | 0       | 23      |
| 0       | 0       | 0       | 0       |
| 0       | 0       | 0       | 0       |
| 0       | 0       | 0       | 0       |
| 0       | 0       | 0       | 0       |
| 0       | 0       | 0       | 0       |
| 0       | 0       | 0       | 0       |
| 0       | 0       | 0       | 0       |
| 0       | 0       | 0       | 0       |
| 0       | 0       | 0       | 0       |
| 0       | 0       | 0       | 0       |
| 0       | 0       | 0       | 0       |
| 0       | 0       | 0       | 0       |
| 7       | 8       | 0       | 4       |
| 7       | 0       | 0       | 0       |
| 0       | 0       | 0       | 0       |
| 0       | 0       | 0       | 0       |
| 5       | 586     | 30      | 631     |
| 887     | 51      | 100     | 0       |
| 195     | 124     | 56      | 28      |
| 0       | 0       | 0       | 0       |
| 1       | 142     | 0       | 13      |
| 0       | 0       | 0       | 0       |
| 365     | 160     | 13      | 0       |
| 7       | 3       | 160     | 19      |
| 0       | 12      | 0       | 32      |
| 0       | 0       | 0       | 2       |
| 2       | 12      | 0       | 9       |

|     |     |     |     |
|-----|-----|-----|-----|
| 0   | 0   | 0   | 4   |
| 0   | 0   | 0   | 0   |
| 0   | 45  | 0   | 79  |
| 1   | 45  | 0   | 15  |
| 0   | 15  | 0   | 0   |
| 0   | 21  | 0   | 1   |
| 0   | 4   | 0   | 0   |
| 0   | 0   | 7   | 3   |
| 0   | 0   | 0   | 0   |
| 0   | 0   | 0   | 106 |
| 3   | 0   | 3   | 0   |
| 0   | 0   | 0   | 0   |
| 0   | 2   | 0   | 0   |
| 0   | 0   | 0   | 0   |
| 0   | 9   | 0   | 0   |
| 0   | 0   | 0   | 0   |
| 0   | 0   | 0   | 6   |
| 0   | 3   | 0   | 0   |
| 0   | 0   | 0   | 0   |
| 0   | 0   | 0   | 0   |
| 0   | 0   | 0   | 2   |
| 0   | 0   | 0   | 0   |
| 0   | 0   | 0   | 0   |
| 0   | 0   | 0   | 0   |
| 0   | 0   | 0   | 0   |
| 0   | 0   | 0   | 0   |
| 0   | 0   | 1   | 0   |
| 0   | 0   | 0   | 1   |
| 0   | 0   | 0   | 0   |
| 0   | 2   | 0   | 5   |
| 0   | 4   | 0   | 1   |
| 0   | 0   | 0   | 0   |
| 0   | 0   | 0   | 0   |
| 0   | 0   | 0   | 0   |
| 0   | 0   | 0   | 0   |
| 0   | 0   | 0   | 0   |
| 0   | 0   | 0   | 0   |
| 0   | 0   | 0   | 0   |
| 0   | 0   | 0   | 0   |
| 0   | 0   | 0   | 0   |
| 0   | 0   | 0   | 0   |
| 125 | 220 | 287 | 441 |
| 0   | 0   | 10  | 2   |
| 8   | 6   | 26  | 0   |
| 2   | 295 | 0   | 133 |
| 16  | 1   | 0   | 1   |
| 0   | 0   | 0   | 2   |
| 0   | 0   | 0   | 7   |
| 0   | 0   | 0   | 0   |
| 0   | 0   | 0   | 0   |

|      |    |    |   |
|------|----|----|---|
| 0    | 0  | 0  | 1 |
| 0    | 0  | 0  | 0 |
| 0    | 0  | 0  | 0 |
| 0    | 0  | 0  | 0 |
| 0    | 0  | 0  | 0 |
| 0    | 0  | 0  | 0 |
| 0    | 0  | 0  | 0 |
| 0    | 0  | 0  | 0 |
| 0    | 0  | 0  | 0 |
| 0    | 0  | 0  | 0 |
| 0    | 0  | 0  | 0 |
| 0    | 0  | 0  | 0 |
| 0    | 0  | 0  | 0 |
| 1466 | 3  | 21 | 4 |
| 0    | 0  | 0  | 0 |
| 0    | 0  | 0  | 0 |
| 0    | 0  | 0  | 0 |
| 0    | 0  | 0  | 0 |
| 52   | 0  | 0  | 0 |
| 0    | 0  | 0  | 0 |
| 0    | 1  | 0  | 0 |
| 0    | 2  | 0  | 3 |
| 1    | 0  | 0  | 3 |
| 0    | 0  | 0  | 8 |
| 45   | 21 | 4  | 0 |
| 3    | 3  | 0  | 0 |
| 54   | 0  | 1  | 0 |
| 0    | 0  | 0  | 0 |
| 0    | 1  | 0  | 0 |
| 0    | 0  | 0  | 0 |
| 0    | 0  | 0  | 0 |
| 0    | 0  | 0  | 0 |
| 0    | 1  | 0  | 4 |
| 0    | 9  | 0  | 6 |
| 0    | 2  | 0  | 3 |
| 43   | 0  | 0  | 0 |
| 0    | 28 | 0  | 0 |
| 0    | 0  | 0  | 0 |
| 0    | 3  | 0  | 1 |
| 0    | 0  | 0  | 0 |
| 0    | 2  | 0  | 0 |
| 0    | 0  | 0  | 0 |
| 0    | 0  | 0  | 0 |
| 0    | 0  | 0  | 0 |
| 0    | 0  | 0  | 0 |
| 0    | 0  | 0  | 7 |
| 0    | 0  | 0  | 0 |



|    |    |     |     |
|----|----|-----|-----|
| 0  | 7  | 0   | 0   |
| 0  | 0  | 0   | 0   |
| 12 | 53 | 8   | 0   |
| 0  | 0  | 0   | 6   |
| 0  | 0  | 0   | 0   |
| 0  | 0  | 0   | 0   |
| 0  | 0  | 0   | 0   |
| 0  | 0  | 0   | 0   |
| 0  | 0  | 0   | 1   |
| 60 | 0  | 0   | 0   |
| 0  | 0  | 0   | 0   |
| 0  | 0  | 0   | 0   |
| 18 | 72 | 169 | 214 |
| 0  | 0  | 0   | 0   |
| 3  | 19 | 0   | 6   |
| 5  | 64 | 4   | 0   |
| 0  | 4  | 0   | 0   |
| 0  | 0  | 0   | 0   |
| 11 | 0  | 0   | 0   |
| 0  | 0  | 0   | 0   |
| 0  | 0  | 0   | 0   |
| 0  | 12 | 0   | 0   |
| 0  | 0  | 2   | 0   |
| 0  | 0  | 0   | 0   |
| 1  | 0  | 0   | 0   |
| 0  | 3  | 0   | 0   |
| 0  | 0  | 0   | 0   |
| 0  | 0  | 0   | 0   |
| 0  | 0  | 0   | 67  |
| 1  | 0  | 0   | 1   |
| 0  | 0  | 0   | 0   |
| 2  | 0  | 0   | 147 |
| 0  | 0  | 0   | 0   |
| 0  | 10 | 0   | 2   |
| 0  | 0  | 0   | 0   |
| 0  | 0  | 0   | 0   |
| 0  | 0  | 0   | 0   |
| 0  | 0  | 0   | 0   |
| 0  | 0  | 7   | 0   |
| 2  | 0  | 0   | 6   |
| 0  | 0  | 0   | 4   |
| 0  | 0  | 0   | 0   |
| 2  | 3  | 0   | 0   |
| 0  | 34 | 1   | 80  |
| 0  | 5  | 0   | 23  |
| 0  | 0  | 0   | 0   |
| 0  | 12 | 3   | 9   |
| 0  | 4  | 0   | 27  |

|      |      |     |      |
|------|------|-----|------|
| 0    | 3    | 0   | 26   |
| 1    | 2    | 5   | 46   |
| 0    | 0    | 0   | 0    |
| 0    | 0    | 0   | 0    |
| 0    | 0    | 0   | 0    |
| 0    | 2    | 0   | 5    |
| 1    | 19   | 0   | 1    |
| 0    | 0    | 0   | 1    |
| 0    | 0    | 6   | 0    |
| 0    | 0    | 0   | 23   |
| 0    | 0    | 0   | 0    |
| 0    | 0    | 0   | 0    |
| 0    | 0    | 0   | 0    |
| 0    | 1    | 0   | 0    |
| 0    | 0    | 0   | 0    |
| 0    | 0    | 0   | 0    |
| 0    | 0    | 0   | 0    |
| 0    | 1    | 0   | 1    |
| 0    | 0    | 1   | 0    |
| 7    | 39   | 0   | 3    |
| 0    | 52   | 0   | 27   |
| 0    | 0    | 0   | 0    |
| 0    | 0    | 0   | 0    |
| 1109 | 3342 | 708 | 3429 |
| 49   | 11   | 18  | 70   |
| 43   | 0    | 0   | 32   |
| 0    | 0    | 0   | 0    |
| 0    | 0    | 0   | 0    |
| 0    | 0    | 0   | 0    |
| 0    | 1    | 0   | 0    |
| 0    | 0    | 0   | 0    |
| 0    | 0    | 0   | 2    |
| 0    | 0    | 0   | 0    |
| 0    | 0    | 0   | 0    |
| 0    | 0    | 0   | 0    |
| 0    | 0    | 0   | 0    |
| 66   | 171  | 21  | 309  |
| 33   | 23   | 4   | 28   |
| 10   | 0    | 2   | 12   |
| 17   | 21   | 31  | 42   |
| 0    | 44   | 0   | 4    |
| 0    | 1    | 0   | 0    |
| 0    | 0    | 0   | 0    |
| 0    | 0    | 0   | 0    |
| 0    | 1    | 0   | 3    |
| 0    | 0    | 1   | 29   |
| 0    | 0    | 0   | 0    |
| 0    | 1    | 0   | 1    |

|     |      |     |     |
|-----|------|-----|-----|
| 0   | 1    | 0   | 0   |
| 0   | 4    | 0   | 0   |
| 0   | 0    | 0   | 0   |
| 0   | 0    | 0   | 50  |
| 0   | 0    | 0   | 0   |
| 0   | 0    | 0   | 0   |
| 0   | 0    | 0   | 0   |
| 0   | 0    | 0   | 1   |
| 0   | 0    | 0   | 4   |
| 0   | 0    | 0   | 1   |
| 0   | 0    | 0   | 0   |
| 0   | 0    | 0   | 0   |
| 0   | 0    | 0   | 0   |
| 0   | 0    | 0   | 0   |
| 0   | 0    | 0   | 1   |
| 0   | 0    | 0   | 0   |
| 0   | 0    | 0   | 0   |
| 0   | 0    | 0   | 0   |
| 0   | 0    | 0   | 0   |
| 5   | 0    | 0   | 0   |
| 0   | 0    | 0   | 0   |
| 2   | 3    | 271 | 3   |
| 1   | 1    | 0   | 0   |
| 262 | 2971 | 116 | 245 |
| 6   | 0    | 24  | 0   |
| 2   | 10   | 2   | 4   |
| 0   | 2    | 2   | 1   |
| 2   | 0    | 0   | 0   |
| 0   | 0    | 0   | 0   |
| 0   | 1    | 0   | 0   |
| 0   | 0    | 0   | 0   |
| 0   | 0    | 0   | 0   |
| 0   | 2    | 0   | 0   |
| 0   | 12   | 0   | 0   |
| 0   | 0    | 0   | 0   |
| 0   | 0    | 0   | 0   |
| 0   | 0    | 0   | 0   |
| 0   | 0    | 0   | 31  |
| 0   | 1    | 0   | 2   |
| 0   | 6    | 0   | 4   |
| 0   | 5    | 0   | 3   |
| 0   | 0    | 0   | 0   |
| 0   | 0    | 0   | 0   |
| 0   | 0    | 0   | 0   |
| 0   | 0    | 0   | 0   |
| 0   | 0    | 0   | 0   |
| 0   | 2    | 0   | 3   |
| 0   | 0    | 0   | 3   |

|      |      |      |     |
|------|------|------|-----|
| 0    | 3    | 0    | 10  |
| 0    | 1    | 0    | 1   |
| 0    | 0    | 0    | 0   |
| 0    | 0    | 84   | 170 |
| 0    | 0    | 0    | 0   |
| 5    | 0    | 29   | 0   |
| 200  | 7    | 37   | 293 |
| 0    | 0    | 0    | 0   |
| 0    | 0    | 0    | 1   |
| 0    | 0    | 0    | 0   |
| 0    | 0    | 0    | 0   |
| 1982 | 4356 | 3452 | 519 |
| 517  | 104  | 97   | 2   |
| 153  | 483  | 311  | 26  |
| 273  | 266  | 291  | 28  |
| 368  | 102  | 162  | 32  |
| 142  | 176  | 22   | 1   |
| 24   | 38   | 9    | 12  |
| 3    | 16   | 3    | 11  |
| 3    | 177  | 1    | 22  |
| 0    | 66   | 2    | 107 |
| 24   | 293  | 98   | 68  |
| 0    | 0    | 0    | 1   |
| 22   | 57   | 2    | 6   |
| 0    | 21   | 0    | 8   |
| 0    | 0    | 0    | 86  |
| 0    | 0    | 0    | 8   |
| 0    | 0    | 0    | 2   |
| 0    | 0    | 0    | 0   |
| 2    | 24   | 0    | 0   |
| 0    | 71   | 0    | 19  |
| 0    | 0    | 0    | 0   |
| 4    | 4    | 0    | 0   |
| 0    | 2    | 0    | 1   |
| 0    | 0    | 0    | 8   |
| 0    | 0    | 0    | 0   |
| 64   | 81   | 20   | 21  |
| 0    | 5    | 0    | 88  |
| 1    | 36   | 0    | 47  |
| 0    | 0    | 0    | 0   |
| 0    | 90   | 0    | 15  |
| 2    | 1    | 6    | 0   |
| 9    | 13   | 0    | 16  |
| 0    | 0    | 0    | 116 |
| 0    | 0    | 0    | 0   |
| 0    | 11   | 0    | 11  |
| 2    | 15   | 0    | 50  |
| 0    | 0    | 0    | 77  |



|    |     |    |      |
|----|-----|----|------|
| 0  | 4   | 0  | 1    |
| 1  | 0   | 0  | 0    |
| 0  | 0   | 0  | 0    |
| 0  | 0   | 1  | 0    |
| 0  | 0   | 0  | 0    |
| 0  | 0   | 0  | 0    |
| 0  | 0   | 0  | 4    |
| 0  | 0   | 0  | 0    |
| 0  | 0   | 0  | 0    |
| 1  | 1   | 0  | 0    |
| 0  | 3   | 0  | 3    |
| 0  | 0   | 0  | 0    |
| 0  | 0   | 0  | 0    |
| 0  | 1   | 0  | 1    |
| 0  | 0   | 0  | 0    |
| 0  | 0   | 0  | 0    |
| 0  | 0   | 0  | 0    |
| 0  | 0   | 0  | 0    |
| 1  | 0   | 0  | 0    |
| 0  | 0   | 0  | 0    |
| 0  | 0   | 0  | 0    |
| 0  | 0   | 0  | 0    |
| 0  | 0   | 0  | 0    |
| 0  | 1   | 0  | 0    |
| 0  | 0   | 0  | 3    |
| 0  | 0   | 0  | 0    |
| 0  | 0   | 0  | 0    |
| 0  | 0   | 0  | 0    |
| 1  | 19  | 0  | 84   |
| 0  | 105 | 0  | 0    |
| 0  | 6   | 0  | 3    |
| 0  | 0   | 0  | 0    |
| 0  | 0   | 0  | 0    |
| 0  | 0   | 0  | 0    |
| 57 | 94  | 52 | 5    |
| 0  | 78  | 5  | 339  |
| 0  | 295 | 0  | 1395 |
| 0  | 41  | 0  | 81   |
| 0  | 6   | 0  | 92   |
| 0  | 0   | 0  | 0    |
| 0  | 0   | 0  | 8    |
| 3  | 88  | 0  | 7    |
| 0  | 2   | 2  | 0    |
| 0  | 2   | 1  | 0    |
| 0  | 0   | 0  | 0    |
| 0  | 0   | 0  | 0    |
| 0  | 0   | 0  | 0    |

|     |     |     |     |
|-----|-----|-----|-----|
| 10  | 64  | 8   | 8   |
| 1   | 147 | 0   | 45  |
| 0   | 97  | 0   | 14  |
| 0   | 9   | 2   | 1   |
| 0   | 1   | 0   | 0   |
| 0   | 0   | 0   | 0   |
| 118 | 9   | 321 | 557 |
| 0   | 20  | 0   | 20  |
| 32  | 207 | 4   | 83  |
| 1   | 28  | 6   | 338 |
| 0   | 39  | 0   | 13  |
| 2   | 0   | 2   | 0   |
| 4   | 20  | 0   | 2   |
| 0   | 2   | 0   | 8   |
| 0   | 0   | 0   | 0   |
| 0   | 0   | 0   | 0   |
| 0   | 1   | 0   | 0   |
| 0   | 0   | 0   | 0   |
| 18  | 197 | 41  | 196 |
| 0   | 0   | 0   | 0   |
| 0   | 0   | 0   | 2   |
| 0   | 9   | 0   | 36  |
| 0   | 0   | 0   | 2   |
| 0   | 0   | 0   | 0   |
| 0   | 0   | 0   | 2   |
| 0   | 0   | 0   | 9   |
| 0   | 0   | 4   | 2   |
| 0   | 0   | 0   | 0   |
| 0   | 0   | 0   | 0   |
| 0   | 0   | 0   | 0   |
| 0   | 0   | 0   | 0   |
| 0   | 0   | 0   | 0   |
| 0   | 0   | 0   | 0   |
| 0   | 0   | 0   | 0   |
| 1   | 0   | 0   | 0   |
| 1   | 0   | 0   | 0   |
| 0   | 0   | 0   | 0   |
| 0   | 0   | 0   | 0   |
| 0   | 0   | 0   | 0   |
| 0   | 0   | 0   | 0   |
| 0   | 0   | 0   | 0   |
| 0   | 0   | 0   | 0   |
| 0   | 0   | 0   | 0   |
| 0   | 0   | 0   | 0   |
| 0   | 0   | 0   | 0   |
| 0   | 5   | 0   | 18  |
| 0   | 0   | 0   | 0   |
| 0   | 0   | 0   | 0   |
| 0   | 0   | 0   | 0   |
| 0   | 0   | 0   | 0   |
| 0   | 0   | 0   | 0   |

|      |     |      |     |
|------|-----|------|-----|
| 0    | 0   | 0    | 0   |
| 0    | 0   | 0    | 0   |
| 70   | 345 | 39   | 102 |
| 0    | 0   | 0    | 3   |
| 0    | 0   | 0    | 0   |
| 0    | 0   | 0    | 0   |
| 0    | 0   | 0    | 0   |
| 0    | 0   | 0    | 0   |
| 0    | 0   | 0    | 0   |
| 0    | 0   | 0    | 0   |
| 0    | 7   | 0    | 146 |
| 0    | 0   | 0    | 0   |
| 0    | 0   | 0    | 0   |
| 0    | 0   | 0    | 0   |
| 8    | 0   | 0    | 0   |
| 0    | 0   | 0    | 0   |
| 0    | 0   | 0    | 0   |
| 0    | 0   | 0    | 0   |
| 0    | 0   | 0    | 0   |
| 0    | 0   | 2    | 0   |
| 0    | 0   | 0    | 0   |
| 0    | 0   | 0    | 0   |
| 0    | 0   | 0    | 0   |
| 0    | 1   | 2    | 0   |
| 0    | 0   | 0    | 1   |
| 0    | 0   | 0    | 1   |
| 0    | 0   | 0    | 0   |
| 2    | 0   | 1    | 0   |
| 1    | 0   | 1    | 0   |
| 0    | 0   | 0    | 0   |
| 129  | 2   | 24   | 0   |
| 0    | 0   | 0    | 0   |
| 0    | 0   | 0    | 0   |
| 0    | 0   | 0    | 0   |
| 0    | 0   | 0    | 0   |
| 4    | 0   | 0    | 0   |
| 0    | 0   | 0    | 0   |
| 0    | 0   | 0    | 0   |
| 0    | 0   | 0    | 0   |
| 154  | 0   | 2    | 0   |
| 0    | 0   | 0    | 0   |
| 0    | 0   | 1    | 0   |
| 3032 | 198 | 1016 | 454 |
| 2    | 0   | 4    | 3   |
| 13   | 9   | 3    | 92  |
| 89   | 125 | 27   | 57  |
| 32   | 24  | 111  | 98  |



|    |    |    |    |
|----|----|----|----|
| 11 | 10 | 9  | 0  |
| 94 | 5  | 41 | 19 |
| 14 | 0  | 0  | 0  |
| 3  | 0  | 5  | 4  |
| 3  | 3  | 2  | 5  |
| 12 | 8  | 10 | 8  |
| 13 | 0  | 7  | 0  |
| 0  | 16 | 0  | 13 |
| 44 | 0  | 8  | 0  |
| 0  | 0  | 0  | 0  |
| 8  | 4  | 0  | 2  |
| 3  | 6  | 3  | 3  |
| 0  | 0  | 0  | 0  |
| 3  | 0  | 1  | 0  |
| 1  | 0  | 2  | 0  |
| 9  | 2  | 3  | 0  |
| 0  | 0  | 0  | 0  |
| 4  | 15 | 16 | 9  |
| 5  | 0  | 4  | 40 |
| 0  | 0  | 1  | 0  |
| 0  | 0  | 0  | 0  |
| 4  | 0  | 3  | 0  |
| 1  | 96 | 0  | 0  |
| 0  | 0  | 0  | 0  |
| 0  | 0  | 0  | 0  |
| 3  | 7  | 7  | 9  |
| 1  | 0  | 0  | 3  |
| 0  | 0  | 0  | 0  |
| 0  | 0  | 0  | 5  |
| 0  | 0  | 0  | 0  |
| 0  | 2  | 0  | 0  |
| 0  | 0  | 0  | 4  |
| 0  | 0  | 0  | 5  |
| 0  | 0  | 0  | 0  |
| 0  | 0  | 0  | 0  |
| 1  | 3  | 0  | 0  |
| 0  | 2  | 0  | 0  |
| 0  | 0  | 0  | 0  |
| 0  | 0  | 2  | 0  |
| 0  | 0  | 0  | 0  |
| 0  | 0  | 0  | 0  |
| 9  | 0  | 0  | 0  |
| 0  | 0  | 0  | 0  |
| 0  | 0  | 0  | 0  |
| 0  | 0  | 0  | 0  |
| 0  | 2  | 0  | 0  |
| 0  | 0  | 0  | 0  |
| 0  | 1  | 0  | 0  |

|     |     |     |     |
|-----|-----|-----|-----|
| 0   | 0   | 0   | 0   |
| 0   | 0   | 0   | 0   |
| 0   | 0   | 0   | 0   |
| 0   | 0   | 0   | 0   |
| 1   | 0   | 0   | 0   |
| 12  | 0   | 4   | 4   |
| 0   | 0   | 0   | 0   |
| 451 | 662 | 241 | 165 |
| 0   | 1   | 0   | 0   |
| 0   | 0   | 0   | 0   |
| 0   | 3   | 0   | 1   |
| 0   | 0   | 0   | 0   |
| 0   | 6   | 0   | 0   |
| 0   | 0   | 0   | 0   |
| 0   | 0   | 0   | 18  |
| 0   | 0   | 0   | 0   |
| 0   | 0   | 0   | 0   |
| 187 | 85  | 0   | 8   |
| 0   | 0   | 1   | 3   |
| 0   | 0   | 0   | 1   |
| 0   | 0   | 0   | 0   |
| 0   | 0   | 2   | 2   |
| 0   | 0   | 0   | 0   |
| 0   | 0   | 0   | 0   |
| 0   | 0   | 0   | 0   |
| 0   | 0   | 0   | 0   |
| 0   | 0   | 0   | 0   |
| 0   | 0   | 0   | 0   |
| 0   | 0   | 0   | 0   |
| 0   | 0   | 0   | 1   |
| 48  | 3   | 31  | 0   |
| 0   | 0   | 1   | 0   |
| 0   | 0   | 0   | 0   |
| 0   | 0   | 0   | 0   |
| 0   | 0   | 0   | 0   |
| 0   | 8   | 0   | 15  |
| 281 | 2   | 271 | 367 |
| 0   | 0   | 1   | 0   |
| 0   | 0   | 1   | 0   |
| 0   | 0   | 0   | 0   |
| 0   | 0   | 0   | 0   |
| 1   | 0   | 1   | 0   |
| 0   | 0   | 0   | 0   |
| 0   | 0   | 0   | 0   |
| 208 | 0   | 3   | 0   |
| 0   | 0   | 0   | 0   |
| 0   | 0   | 1   | 0   |
| 0   | 0   | 0   | 0   |



|      |    |     |    |
|------|----|-----|----|
| 3    | 0  | 0   | 0  |
| 4778 | 13 | 513 | 51 |
| 369  | 1  | 48  | 12 |
| 173  | 1  | 34  | 5  |
| 0    | 0  | 0   | 0  |
| 0    | 0  | 0   | 0  |
| 8    | 0  | 2   | 0  |
| 1    | 0  | 0   | 0  |
| 0    | 0  | 0   | 0  |
| 113  | 0  | 47  | 0  |
| 0    | 0  | 0   | 0  |
| 0    | 0  | 0   | 0  |
| 0    | 0  | 0   | 0  |
| 0    | 0  | 1   | 0  |
| 9    | 0  | 2   | 0  |
| 0    | 1  | 0   | 1  |
| 0    | 0  | 0   | 0  |
| 0    | 0  | 0   | 0  |
| 0    | 0  | 0   | 0  |
| 12   | 0  | 0   | 0  |
| 1    | 0  | 4   | 1  |
| 0    | 5  | 0   | 2  |
| 0    | 0  | 0   | 0  |
| 1    | 0  | 0   | 0  |
| 0    | 0  | 0   | 0  |
| 0    | 0  | 0   | 1  |
| 0    | 0  | 0   | 0  |
| 0    | 0  | 0   | 0  |
| 0    | 0  | 0   | 0  |
| 0    | 0  | 0   | 0  |
| 0    | 0  | 0   | 0  |
| 0    | 0  | 0   | 0  |
| 1    | 0  | 0   | 0  |
| 307  | 0  | 40  | 0  |
| 627  | 2  | 26  | 3  |
| 923  | 19 | 138 | 85 |
| 552  | 0  | 262 | 43 |
| 0    | 0  | 2   | 0  |
| 14   | 7  | 48  | 89 |
| 93   | 20 | 16  | 39 |
| 81   | 3  | 5   | 0  |
| 175  | 0  | 54  | 1  |
| 0    | 0  | 0   | 4  |
| 20   | 11 | 1   | 28 |
| 5    | 0  | 0   | 0  |
| 54   | 7  | 2   | 0  |
| 0    | 0  | 0   | 0  |
| 1    | 3  | 0   | 29 |

|   |    |   |    |
|---|----|---|----|
| 0 | 0  | 0 | 0  |
| 0 | 0  | 0 | 0  |
| 0 | 0  | 0 | 0  |
| 0 | 0  | 0 | 0  |
| 0 | 0  | 0 | 0  |
| 0 | 0  | 0 | 6  |
| 0 | 0  | 0 | 0  |
| 0 | 0  | 0 | 0  |
| 0 | 0  | 0 | 0  |
| 0 | 0  | 0 | 0  |
| 0 | 0  | 0 | 0  |
| 0 | 0  | 0 | 0  |
| 0 | 0  | 0 | 0  |
| 0 | 0  | 0 | 0  |
| 0 | 0  | 0 | 1  |
| 0 | 0  | 0 | 0  |
| 0 | 0  | 0 | 0  |
| 0 | 11 | 0 | 0  |
| 0 | 3  | 0 | 0  |
| 0 | 0  | 0 | 0  |
| 0 | 0  | 0 | 0  |
| 5 | 0  | 1 | 0  |
| 0 | 0  | 0 | 0  |
| 0 | 0  | 0 | 0  |
| 0 | 0  | 0 | 0  |
| 1 | 0  | 0 | 0  |
| 0 | 2  | 0 | 0  |
| 0 | 0  | 0 | 0  |
| 2 | 0  | 1 | 5  |
| 0 | 0  | 0 | 5  |
| 0 | 0  | 0 | 1  |
| 0 | 0  | 0 | 0  |
| 0 | 0  | 0 | 0  |
| 0 | 0  | 0 | 0  |
| 0 | 0  | 0 | 0  |
| 0 | 0  | 0 | 0  |
| 0 | 0  | 0 | 0  |
| 0 | 0  | 0 | 0  |
| 0 | 0  | 0 | 0  |
| 0 | 0  | 0 | 0  |
| 0 | 0  | 1 | 0  |
| 6 | 0  | 5 | 11 |
| 0 | 0  | 0 | 0  |
| 0 | 0  | 0 | 1  |
| 0 | 0  | 0 | 0  |
| 0 | 0  | 0 | 0  |
| 0 | 0  | 0 | 0  |
| 0 | 0  | 0 | 0  |

|      |    |     |      |
|------|----|-----|------|
| 1792 | 78 | 671 | 1802 |
| 1542 | 29 | 102 | 65   |
| 0    | 0  | 0   | 0    |
| 0    | 0  | 0   | 0    |
| 0    | 3  | 0   | 0    |
| 1    | 0  | 0   | 2    |
| 0    | 0  | 0   | 0    |
| 0    | 0  | 0   | 0    |
| 0    | 0  | 0   | 0    |
| 0    | 0  | 0   | 0    |
| 0    | 0  | 0   | 0    |
| 0    | 0  | 0   | 0    |
| 20   | 0  | 14  | 44   |
| 0    | 0  | 0   | 2    |
| 770  | 2  | 96  | 104  |
| 0    | 0  | 0   | 0    |
| 0    | 0  | 0   | 0    |
| 0    | 0  | 0   | 0    |
| 0    | 0  | 0   | 0    |
| 11   | 1  | 4   | 3    |
| 1    | 0  | 0   | 1    |
| 0    | 0  | 0   | 0    |
| 0    | 0  | 0   | 0    |
| 0    | 0  | 0   | 0    |
| 5509 | 21 | 60  | 16   |
| 0    | 0  | 0   | 0    |
| 0    | 0  | 0   | 0    |
| 26   | 2  | 36  | 81   |
| 41   | 1  | 18  | 20   |
| 1281 | 12 | 138 | 35   |
| 1257 | 1  | 81  | 21   |
| 131  | 1  | 8   | 3    |
| 351  | 7  | 58  | 88   |
| 5    | 0  | 0   | 0    |
| 125  | 1  | 57  | 13   |
| 39   | 0  | 4   | 0    |
| 1    | 0  | 2   | 3    |
| 0    | 0  | 0   | 0    |
| 0    | 0  | 0   | 0    |
| 0    | 0  | 0   | 0    |
| 0    | 0  | 0   | 0    |
| 0    | 0  | 0   | 0    |
| 0    | 0  | 0   | 0    |
| 65   | 1  | 131 | 116  |
| 129  | 1  | 23  | 44   |
| 0    | 0  | 0   | 0    |
| 311  | 1  | 9   | 1    |
| 0    | 0  | 1   | 0    |

|      |     |     |      |
|------|-----|-----|------|
| 0    | 0   | 0   | 0    |
| 1    | 0   | 0   | 0    |
| 0    | 0   | 0   | 0    |
| 0    | 0   | 1   | 0    |
| 0    | 0   | 0   | 0    |
| 0    | 0   | 0   | 0    |
| 0    | 0   | 0   | 0    |
| 4    | 0   | 0   | 0    |
| 0    | 0   | 0   | 0    |
| 35   | 39  | 4   | 53   |
| 0    | 3   | 0   | 3    |
| 0    | 0   | 0   | 0    |
| 0    | 0   | 0   | 0    |
| 0    | 0   | 0   | 0    |
| 0    | 0   | 0   | 0    |
| 631  | 2   | 177 | 81   |
| 202  | 4   | 133 | 91   |
| 27   | 0   | 2   | 1    |
| 12   | 0   | 6   | 3    |
| 3    | 0   | 0   | 0    |
| 2    | 0   | 2   | 0    |
| 0    | 0   | 0   | 0    |
| 0    | 0   | 0   | 0    |
| 2    | 0   | 0   | 0    |
| 1    | 0   | 0   | 0    |
| 10   | 0   | 2   | 0    |
| 1    | 0   | 0   | 0    |
| 0    | 0   | 0   | 0    |
| 205  | 0   | 1   | 0    |
| 89   | 0   | 12  | 7    |
| 61   | 0   | 1   | 1    |
| 66   | 2   | 37  | 26   |
| 253  | 0   | 47  | 2    |
| 0    | 0   | 0   | 0    |
| 0    | 0   | 0   | 0    |
| 0    | 0   | 0   | 0    |
| 0    | 0   | 0   | 0    |
| 2    | 0   | 1   | 0    |
| 1877 | 239 | 172 | 1046 |
| 52   | 34  | 5   | 151  |
| 208  | 44  | 13  | 90   |
| 13   | 33  | 4   | 174  |
| 41   | 6   | 1   | 8    |
| 0    | 4   | 0   | 1    |
| 0    | 19  | 0   | 4    |
| 0    | 0   | 0   | 2    |
| 0    | 0   | 0   | 0    |
| 0    | 0   | 0   | 0    |

|     |     |    |    |
|-----|-----|----|----|
| 0   | 0   | 0  | 0  |
| 0   | 0   | 0  | 0  |
| 0   | 0   | 0  | 0  |
| 0   | 0   | 0  | 0  |
| 0   | 0   | 0  | 0  |
| 0   | 0   | 0  | 0  |
| 0   | 0   | 0  | 0  |
| 0   | 0   | 0  | 0  |
| 0   | 0   | 0  | 2  |
| 0   | 0   | 0  | 1  |
| 0   | 0   | 0  | 1  |
| 0   | 0   | 0  | 0  |
| 0   | 0   | 0  | 0  |
| 0   | 0   | 0  | 0  |
| 0   | 0   | 0  | 0  |
| 6   | 0   | 0  | 0  |
| 0   | 0   | 2  | 0  |
| 22  | 1   | 2  | 0  |
| 0   | 0   | 0  | 0  |
| 5   | 0   | 0  | 1  |
| 129 | 6   | 33 | 0  |
| 6   | 0   | 5  | 0  |
| 1   | 0   | 0  | 0  |
| 0   | 9   | 0  | 0  |
| 0   | 0   | 0  | 0  |
| 0   | 0   | 0  | 0  |
| 695 | 6   | 83 | 96 |
| 1   | 0   | 0  | 0  |
| 0   | 3   | 0  | 0  |
| 0   | 0   | 0  | 0  |
| 1   | 0   | 0  | 0  |
| 0   | 148 | 0  | 21 |
| 0   | 0   | 0  | 5  |
| 0   | 0   | 0  | 0  |
| 0   | 13  | 1  | 2  |
| 0   | 0   | 0  | 5  |
| 0   | 1   | 0  | 0  |
| 0   | 0   | 0  | 0  |
| 0   | 0   | 0  | 0  |
| 2   | 0   | 0  | 2  |
| 0   | 0   | 0  | 0  |
| 0   | 0   | 0  | 0  |
| 0   | 0   | 0  | 0  |
| 3   | 0   | 0  | 0  |
| 1   | 0   | 0  | 0  |
| 19  | 0   | 1  | 0  |
| 0   | 0   | 0  | 4  |
| 0   | 0   | 1  | 0  |
| 0   | 0   | 0  | 0  |



|      |     |      |     |
|------|-----|------|-----|
| 0    | 0   | 0    | 0   |
| 0    | 0   | 0    | 0   |
| 3642 | 226 | 1272 | 102 |
| 229  | 0   | 1079 | 120 |
| 1243 | 98  | 383  | 36  |
| 2    | 26  | 0    | 85  |
| 236  | 12  | 77   | 0   |
| 169  | 627 | 130  | 305 |
| 4    | 21  | 13   | 29  |
| 26   | 0   | 37   | 6   |
| 462  | 43  | 119  | 0   |
| 2    | 5   | 0    | 0   |
| 83   | 23  | 49   | 8   |
| 680  | 64  | 454  | 19  |
| 290  | 202 | 748  | 52  |
| 251  | 4   | 80   | 2   |
| 2    | 17  | 0    | 13  |
| 0    | 0   | 1    | 0   |
| 103  | 1   | 157  | 1   |
| 0    | 0   | 0    | 0   |
| 0    | 1   | 0    | 0   |
| 0    | 6   | 0    | 1   |
| 108  | 17  | 14   | 1   |
| 161  | 33  | 34   | 20  |
| 23   | 0   | 15   | 7   |
| 47   | 4   | 25   | 6   |
| 18   | 52  | 49   | 33  |
| 0    | 0   | 0    | 0   |
| 0    | 51  | 0    | 17  |
| 0    | 0   | 0    | 9   |
| 81   | 2   | 54   | 2   |
| 3    | 4   | 0    | 2   |
| 0    | 0   | 0    | 0   |
| 1    | 0   | 0    | 0   |
| 0    | 5   | 0    | 13  |
| 2    | 2   | 3    | 0   |
| 0    | 14  | 0    | 19  |
| 2    | 6   | 0    | 0   |
| 0    | 5   | 0    | 0   |
| 1    | 26  | 0    | 4   |
| 0    | 0   | 0    | 0   |
| 0    | 35  | 0    | 6   |
| 0    | 0   | 0    | 0   |
| 3    | 1   | 2    | 0   |
| 0    | 0   | 0    | 0   |
| 0    | 1   | 0    | 3   |
| 0    | 8   | 0    | 0   |
| 0    | 2   | 0    | 0   |

|     |    |    |    |
|-----|----|----|----|
| 0   | 0  | 0  | 0  |
| 0   | 6  | 0  | 2  |
| 12  | 0  | 0  | 0  |
| 1   | 19 | 0  | 15 |
| 0   | 9  | 0  | 2  |
| 0   | 0  | 0  | 0  |
| 0   | 0  | 0  | 0  |
| 0   | 0  | 0  | 0  |
| 3   | 0  | 2  | 2  |
| 0   | 5  | 0  | 0  |
| 0   | 2  | 1  | 0  |
| 0   | 0  | 0  | 0  |
| 0   | 0  | 0  | 0  |
| 0   | 0  | 0  | 14 |
| 0   | 0  | 0  | 0  |
| 0   | 0  | 0  | 0  |
| 0   | 0  | 0  | 1  |
| 0   | 0  | 0  | 13 |
| 0   | 0  | 0  | 0  |
| 0   | 0  | 0  | 2  |
| 0   | 0  | 0  | 0  |
| 0   | 0  | 0  | 0  |
| 0   | 0  | 0  | 4  |
| 0   | 0  | 0  | 0  |
| 0   | 0  | 0  | 0  |
| 0   | 0  | 0  | 0  |
| 0   | 0  | 0  | 0  |
| 0   | 0  | 0  | 0  |
| 0   | 0  | 0  | 0  |
| 0   | 0  | 0  | 0  |
| 0   | 0  | 0  | 0  |
| 0   | 2  | 0  | 1  |
| 0   | 0  | 0  | 0  |
| 0   | 0  | 0  | 0  |
| 0   | 0  | 0  | 0  |
| 0   | 0  | 0  | 0  |
| 0   | 0  | 0  | 0  |
| 0   | 0  | 0  | 0  |
| 0   | 0  | 0  | 0  |
| 2   | 0  | 0  | 0  |
| 0   | 0  | 0  | 0  |
| 0   | 0  | 0  | 0  |
| 0   | 0  | 0  | 0  |
| 1   | 0  | 1  | 0  |
| 1   | 1  | 0  | 0  |
| 0   | 0  | 0  | 0  |
| 0   | 0  | 0  | 0  |
| 0   | 0  | 0  | 0  |
| 0   | 0  | 0  | 0  |
| 268 | 19 | 48 | 6  |
| 12  | 1  | 2  | 0  |
| 24  | 5  | 1  | 15 |
| 6   | 0  | 13 | 0  |

|      |     |      |     |
|------|-----|------|-----|
| 0    | 0   | 0    | 0   |
| 1    | 0   | 1    | 0   |
| 0    | 0   | 0    | 0   |
| 14   | 3   | 5    | 0   |
| 0    | 0   | 0    | 0   |
| 0    | 0   | 5    | 0   |
| 0    | 0   | 0    | 0   |
| 0    | 0   | 0    | 0   |
| 674  | 134 | 74   | 24  |
| 6787 | 619 | 2145 | 918 |
| 474  | 9   | 22   | 4   |
| 37   | 1   | 23   | 1   |
| 853  | 25  | 410  | 43  |
| 489  | 5   | 41   | 3   |
| 0    | 9   | 0    | 0   |
| 33   | 1   | 6    | 1   |
| 24   | 2   | 309  | 61  |
| 231  | 1   | 62   | 1   |
| 1    | 0   | 1    | 0   |
| 20   | 0   | 6    | 1   |
| 28   | 0   | 2    | 4   |
| 26   | 3   | 1    | 2   |
| 6    | 0   | 17   | 1   |
| 0    | 0   | 0    | 0   |
| 13   | 0   | 3    | 0   |
| 2    | 1   | 0    | 4   |
| 1    | 0   | 0    | 0   |
| 38   | 1   | 6    | 1   |
| 1    | 0   | 1    | 1   |
| 0    | 0   | 0    | 0   |
| 9    | 0   | 2    | 0   |
| 0    | 0   | 0    | 0   |
| 6    | 2   | 1    | 2   |
| 1    | 3   | 0    | 0   |
| 0    | 0   | 0    | 0   |
| 0    | 0   | 0    | 0   |
| 0    | 0   | 0    | 1   |
| 0    | 1   | 8    | 0   |
| 0    | 0   | 0    | 0   |
| 1    | 0   | 0    | 0   |
| 0    | 0   | 0    | 0   |
| 0    | 0   | 0    | 0   |
| 0    | 0   | 4    | 0   |
| 0    | 0   | 0    | 0   |
| 0    | 0   | 0    | 0   |
| 0    | 0   | 0    | 0   |
| 5    | 0   | 0    | 1   |
| 0    | 0   | 2    | 2   |







|      |    |     |    |
|------|----|-----|----|
| 0    | 0  | 0   | 3  |
| 2795 | 11 | 155 | 25 |
| 328  | 2  | 18  | 5  |
| 0    | 0  | 0   | 0  |
| 0    | 0  | 0   | 0  |
| 0    | 0  | 3   | 0  |
| 0    | 4  | 0   | 1  |
| 0    | 0  | 0   | 0  |
| 0    | 0  | 0   | 0  |
| 1560 | 21 | 110 | 10 |
| 824  | 9  | 81  | 21 |
| 6    | 5  | 0   | 0  |
| 0    | 10 | 0   | 1  |
| 0    | 0  | 0   | 0  |
| 0    | 0  | 0   | 0  |
| 0    | 8  | 0   | 2  |
| 13   | 7  | 0   | 0  |
| 0    | 0  | 0   | 1  |
| 0    | 0  | 0   | 0  |
| 0    | 5  | 0   | 0  |
| 0    | 0  | 0   | 0  |
| 0    | 0  | 0   | 0  |
| 0    | 0  | 0   | 0  |
| 0    | 0  | 0   | 0  |
| 0    | 0  | 0   | 0  |
| 0    | 0  | 0   | 0  |
| 0    | 0  | 0   | 0  |
| 0    | 0  | 0   | 0  |
| 0    | 0  | 0   | 0  |
| 0    | 0  | 0   | 0  |
| 0    | 0  | 0   | 0  |
| 0    | 0  | 0   | 0  |
| 0    | 0  | 0   | 0  |
| 0    | 0  | 1   | 0  |
| 0    | 0  | 0   | 0  |
| 0    | 0  | 0   | 0  |
| 31   | 2  | 0   | 4  |
| 2    | 0  | 0   | 0  |
| 0    | 0  | 0   | 0  |
| 0    | 0  | 0   | 0  |
| 0    | 0  | 0   | 0  |
| 0    | 0  | 0   | 0  |
| 0    | 0  | 0   | 0  |
| 52   | 10 | 122 | 26 |
| 1    | 1  | 0   | 9  |
| 0    | 0  | 0   | 53 |
| 0    | 0  | 0   | 11 |
| 14   | 0  | 2   | 2  |
| 0    | 0  | 0   | 0  |
| 0    | 0  | 2   | 0  |
| 0    | 0  | 0   | 6  |

































































| Blast % similarity | Blast Hit Genbank |
|--------------------|-------------------|
| 83.78%             | KF607087          |
| 83.78%             | KC139715          |
| 84.68%             | KC139715          |
| 81.98%             | KC139717          |
| 81.08%             | KC139715          |
| 82.88%             | KC139717          |
| 81.08%             | KC139715          |
| 88.8%              | AF060455          |
| 88.8%              | AF060455          |
| 97.56%             | KF569684          |
| 87.7%              | KF569684          |
| 86.06%             | KF569684          |
| 90.16%             | KF569684          |
| 84.92%             | JF747213          |
| 87.12%             | U82204            |
| 85.6%              | JF747212          |
| 88.7%              | AF060453          |
| 90.16%             | JF747216          |
| 100.0%             | HM215507          |
| 88.52%             | M97908            |
| 82.11%             | DQ388599          |
| 90.24%             | M97908            |
| 88.52%             | M97908            |
| 89.34%             | M97908            |
| 85.24%             | M97908            |
| 95.93%             | M97908            |
| 98.37%             | DQ388599          |
| 90.98%             | M97908            |
| 99.18%             | JF747216          |
| 89.34%             | JF747215          |
| 89.34%             | HM140394          |
| 96.74%             | HM140394          |
| 88.52%             | JF747217          |
| 86.88%             | JF747218          |
| 89.34%             | JF747218          |
| 93.49%             | JF747217          |
| 99.19%             | GQ259748          |
| 81.14%             | GQ259748          |
| 91.86%             | GQ259748          |
| 83.6%              | GQ259748          |
| 87.7%              | EU264562          |
| 87.7%              | GQ259748          |
| 86.88%             | EU264562          |
| 85.24%             | GQ259748          |
| 83.6%              | GQ259748          |
| 86.06%             | GQ259748          |
| 86.06%             | EU264562          |

|        |          |
|--------|----------|
| 86.88% | GQ259748 |
| 84.42% | GQ259748 |
| 80.32% | GQ259748 |
| 85.24% | GQ259748 |
| 90.16% | GQ259748 |
| 83.6%  | GQ259748 |
| 84.42% | GQ259748 |
| 84.42% | GQ259748 |
| 95.12% | EU264562 |
| 81.14% | GQ259748 |
| 85.24% | GQ259748 |
| 83.6%  | EU264562 |
| 84.42% | GQ259748 |
| 86.06% | GQ259748 |
| 85.24% | EU264562 |
| 85.24% | GQ259748 |
| 84.42% | EU264562 |
| 84.42% | GQ259748 |
| 86.17% | EU264562 |
| 85.24% | EU264562 |
| 86.06% | EU264562 |
| 92.68% | GQ259748 |
| 98.37% | GQ259748 |
| 95.12% | GQ259748 |
| 83.6%  | GQ259748 |
| 85.24% | GQ259748 |
| 86.06% | GQ259748 |
| 84.42% | GQ259748 |
| 97.56% | GQ259748 |
| 86.88% | JQ723962 |
| 88.52% | JQ723962 |
| 87.7%  | JQ723962 |
| 90.16% | EU264564 |
| 95.93% | AF060454 |
| 81.3%  | JQ356868 |
| 98.37% | AF060452 |
| 100.0% | AF060452 |
| 87.7%  | AF300288 |
| 99.18% | AF300286 |
| 92.15% | JN412739 |
| 100.0% | JN412737 |
| 95.04% | JN084213 |
| 86.0%  | JN084213 |
| 97.0%  | JN084213 |
| 87.0%  | JN412739 |
| 85.57% | JN412738 |
| 94.0%  | JN412740 |
| 96.0%  | JN412737 |

|        |          |
|--------|----------|
| 84.46% | JN412738 |
| 92.0%  | JN412737 |
| 98.0%  | JN412740 |
| 96.38% | JN412737 |
| 84.15% | JN412739 |
| 100.0% | HQ227994 |
| 95.09% | HQ227994 |
| 93.06% | HQ227994 |
| 94.0%  | HQ227994 |
| 96.03% | HQ227994 |
| 100.0% | HQ227920 |
| 93.0%  | HQ227994 |
| 98.0%  | HQ227994 |
| 82.56% | JF263448 |
| 95.93% | FJ876971 |
| 88.61% | FJ876971 |
| 87.7%  | FJ876971 |
| 98.37% | FJ876971 |
| 95.93% | FJ876971 |
| 99.06% | U57771   |
| 97.19% | U57771   |
| 80.0%  | DQ487196 |
| 81.73% | JF263447 |
| 83.65% | JF263447 |
| 83.49% | JF263447 |
| 87.7%  | FJ875140 |
| 87.8%  | FJ875140 |
| 88.52% | FJ875140 |
| 89.34% | FJ875140 |
| 85.24% | FJ875140 |
| 80.18% | DQ411860 |
| 95.28% | DQ411860 |
| 84.61% | JF263444 |
| 84.61% | JF263444 |
| 83.8%  | JF263444 |
| 84.61% | JF263444 |
| 98.11% | Z22931   |
| 96.0%  | JF263451 |
| 94.0%  | Z22931   |
| 81.13% | DQ411863 |
| 91.5%  | HM581673 |
| 82.24% | U80313   |
| 83.48% | U80313   |
| 93.45% | AY102173 |
| 91.58% | GQ351698 |
| 97.19% | L26448   |
| 80.73% | EF123708 |
| 97.19% | KC493570 |

|        |          |
|--------|----------|
| 80.9%  | AF298821 |
| 80.55% | AB794977 |
| 80.23% | AB555711 |
| 80.73% | AB555712 |
| 80.37% | AB555711 |
| 83.33% | AB555712 |
| 86.2%  | AB555711 |
| 80.55% | AB555712 |
| 82.4%  | AB795029 |
| 84.25% | AB555710 |
| 81.98% | U57769   |
| 80.55% | AB794982 |
| 86.06% | HQ668466 |
| 88.52% | HQ668466 |
| 83.47% | EU286811 |
| 83.47% | EU286811 |
| 85.95% | EU286811 |
| 84.29% | HQ668466 |
| 87.8%  | HQ668466 |
| 83.47% | HQ668466 |
| 84.29% | HQ668466 |
| 82.78% | HQ668466 |
| 81.81% | HQ668466 |
| 83.47% | EU286811 |
| 83.47% | HQ668466 |
| 81.66% | HQ668466 |
| 81.3%  | HQ668466 |
| 91.26% | EU264560 |
| 83.87% | KC832955 |
| 85.18% | KC832955 |
| 94.3%  | KC832949 |
| 89.34% | X65149   |
| 92.68% | X65149   |
| 89.34% | X65149   |
| 87.8%  | X65149   |
| 88.52% | X65149   |
| 97.56% | X65149   |
| 97.34% | DQ232761 |
| 93.22% | HQ591488 |
| 100.0% | HQ591488 |
| 90.83% | HQ591488 |
| 91.52% | HQ591473 |
| 94.87% | EU503535 |
| 93.22% | EU503534 |
| 88.42% | EU503534 |
| 88.79% | EU503534 |
| 93.22% | EU503534 |
| 92.37% | EU503534 |

|        |          |
|--------|----------|
| 88.88% | EU503534 |
| 87.28% | EU503535 |
| 90.51% | EU503534 |
| 88.33% | EU503534 |
| 92.37% | EU503534 |
| 93.16% | EU503534 |
| 95.72% | EU503535 |
| 94.01% | EU503535 |
| 94.06% | EU503535 |
| 91.52% | EU503534 |
| 92.37% | EU503535 |
| 92.3%  | EU503535 |
| 90.67% | EU503535 |
| 92.24% | EU503534 |
| 91.52% | EU503535 |
| 87.06% | EU503534 |
| 91.52% | EU503534 |
| 92.37% | EU503534 |
| 93.1%  | EU503534 |
| 87.06% | EU503538 |
| 93.16% | EU503538 |
| 86.55% | EU503536 |
| 85.34% | EU503538 |
| 99.14% | EU503539 |
| 88.88% | EU503539 |
| 91.45% | EU503539 |
| 89.16% | EU503539 |
| 98.29% | EU503539 |
| 89.91% | EU503539 |
| 96.58% | EU503539 |
| 84.61% | EU503539 |
| 96.58% | EU503539 |
| 87.17% | EU503539 |
| 96.58% | EU503539 |
| 98.29% | EU503539 |
| 98.3%  | KF516511 |
| 91.52% | KF516511 |
| 90.67% | KF516511 |
| 91.52% | KF516511 |
| 98.3%  | KF516511 |
| 90.67% | KF516511 |
| 89.83% | KF516511 |
| 90.67% | KF516511 |
| 92.37% | KF516511 |
| 90.67% | KF516511 |
| 88.42% | KF516511 |
| 88.98% | KF516511 |
| 93.22% | KF516511 |



|        |          |
|--------|----------|
| 91.52% | KF516511 |
| 87.6%  | KF516511 |
| 92.37% | KF516511 |
| 94.06% | KF516511 |
| 90.67% | KF516511 |
| 95.76% | KF516511 |
| 91.52% | KF516511 |
| 95.76% | KF516511 |
| 97.45% | KF516511 |
| 91.52% | KF516511 |
| 96.61% | KF516511 |
| 92.37% | KF516511 |
| 88.98% | KF516511 |
| 88.98% | KF516511 |
| 88.33% | KF516511 |
| 89.83% | KF516511 |
| 99.15% | KF516511 |
| 81.96% | HQ446276 |
| 81.81% | HQ446276 |
| 85.0%  | HQ446277 |
| 85.0%  | HQ446277 |
| 100.0% | X56171   |
| 86.17% | HE819879 |
| 90.0%  | HM030738 |
| 90.9%  | HM030738 |
| 88.33% | HM030738 |
| 90.0%  | HM030738 |
| 86.66% | HM030738 |
| 88.33% | HM030738 |
| 88.33% | HM030738 |
| 87.6%  | HM030738 |
| 87.7%  | HM030738 |
| 88.33% | AF255357 |
| 88.33% | AF255357 |
| 86.77% | AF255357 |
| 86.88% | AF255357 |
| 100.0% | EF417835 |
| 80.9%  | EF599288 |
| 81.65% | AY788099 |
| 80.9%  | EF569682 |
| 80.0%  | EF599288 |
| 82.88% | EF599288 |
| 80.9%  | EF569682 |
| 82.56% | JQ663868 |
| 82.72% | EF599288 |
| 99.08% | AY788099 |
| 81.65% | JQ663869 |
| 82.4%  | JQ663869 |

|        |          |
|--------|----------|
| 84.4%  | JQ663869 |
| 80.73% | JQ663869 |
| 94.33% | GU187058 |
| 94.49% | DQ662847 |
| 100.0% | KF524423 |
| 100.0% | KF524426 |
| 100.0% | DQ868351 |
| 89.81% | DQ868350 |
| 98.14% | DQ662855 |
| 97.22% | AF429897 |
| 94.44% | DQ868352 |
| 88.42% | FJ870103 |
| 85.95% | FJ870103 |
| 87.6%  | FJ870103 |
| 87.6%  | FJ870103 |
| 86.77% | FJ870103 |
| 89.25% | FJ870103 |
| 90.83% | FJ870103 |
| 85.95% | FJ870103 |
| 89.25% | FJ870103 |
| 89.25% | FJ870103 |
| 90.9%  | FJ870103 |
| 85.83% | FJ870103 |
| 89.25% | FJ870103 |
| 85.0%  | FJ870103 |
| 84.16% | FJ870103 |
| 86.66% | FJ870103 |
| 88.33% | FJ870103 |
| 89.25% | FJ870103 |
| 85.12% | FJ870103 |
| 86.06% | FJ870103 |
| 85.83% | FJ870103 |
| 95.04% | FJ870103 |
| 90.16% | FJ870103 |
| 89.25% | FJ870103 |
| 85.12% | FJ870103 |
| 90.16% | FJ870103 |
| 89.25% | FJ870103 |
| 90.08% | FJ870103 |
| 87.6%  | FJ870103 |
| 85.95% | FJ870103 |
| 89.25% | FJ870103 |
| 87.6%  | FJ870103 |
| 87.7%  | FJ870103 |
| 85.83% | FJ870103 |
| 88.42% | FJ870103 |
| 80.83% | FJ870103 |
| 84.16% | FJ870103 |

|        |          |
|--------|----------|
| 89.25% | FJ870103 |
| 88.42% | FJ870103 |
| 89.16% | FJ870103 |
| 87.6%  | FJ870103 |
| 90.08% | FJ870103 |
| 86.77% | FJ870103 |
| 90.0%  | FJ870103 |
| 87.6%  | FJ870103 |
| 87.7%  | FJ870103 |
| 85.12% | FJ870103 |
| 85.12% | FJ870103 |
| 89.16% | FJ870103 |
| 88.42% | FJ870103 |
| 86.66% | FJ870103 |
| 89.25% | FJ870103 |
| 80.83% | FJ870103 |
| 85.12% | FJ870103 |
| 86.88% | FJ870103 |
| 84.29% | FJ870103 |
| 90.08% | FJ870103 |
| 85.12% | FJ870103 |
| 88.52% | FJ870103 |
| 90.0%  | FJ870103 |
| 90.0%  | FJ870103 |
| 87.6%  | FJ870103 |
| 86.06% | FJ870103 |
| 86.77% | FJ870103 |
| 89.34% | FJ870103 |
| 86.77% | FJ870103 |
| 85.83% | FJ870103 |
| 85.95% | FJ870103 |
| 88.42% | FJ870103 |
| 88.42% | FJ870103 |
| 88.42% | FJ870103 |
| 89.25% | FJ870103 |
| 85.24% | FJ870103 |
| 85.12% | FJ870103 |
| 87.6%  | FJ870103 |
| 87.6%  | FJ870103 |
| 87.6%  | FJ870103 |
| 88.42% | FJ870103 |
| 87.5%  | FJ870103 |
| 89.25% | FJ870103 |
| 85.12% | FJ870103 |
| 88.42% | FJ870103 |
| 86.77% | FJ870103 |
| 84.16% | FJ870103 |
| 85.12% | FJ870103 |

|        |          |
|--------|----------|
| 86.77% | FJ870103 |
| 88.42% | FJ870103 |
| 86.66% | FJ870103 |
| 87.6%  | FJ870103 |
| 85.95% | FJ870103 |
| 85.95% | FJ870103 |
| 84.29% | FJ870103 |
| 88.42% | FJ870103 |
| 85.12% | FJ870103 |
| 88.42% | FJ870103 |
| 86.77% | FJ870103 |
| 87.6%  | FJ870103 |
| 88.42% | FJ870103 |
| 84.42% | FJ870103 |
| 88.52% | FJ870103 |
| 89.34% | FJ870103 |
| 87.6%  | FJ870103 |
| 87.6%  | FJ870103 |
| 89.25% | FJ870103 |
| 90.98% | FJ870103 |
| 90.9%  | FJ870103 |
| 85.95% | FJ870103 |
| 85.95% | FJ870103 |
| 80.99% | FJ870103 |
| 88.42% | FJ870103 |
| 88.42% | FJ870103 |
| 85.95% | FJ870103 |
| 85.12% | FJ870103 |
| 85.83% | FJ870103 |
| 86.88% | KF301567 |
| 89.43% | KF301567 |
| 88.52% | KF301567 |
| 86.88% | KF301567 |
| 87.7%  | KF301567 |
| 88.52% | KF301567 |
| 90.0%  | JX310020 |
| 90.83% | JX310020 |
| 92.43% | JX310020 |
| 83.33% | JX310020 |
| 91.59% | JX310020 |
| 91.59% | JX310020 |
| 90.75% | JX310020 |
| 84.29% | FJ868186 |
| 85.12% | FJ868186 |
| 82.92% | FJ868188 |
| 81.81% | FJ868186 |
| 87.5%  | FJ868186 |
| 95.53% | HM236335 |

|        |          |
|--------|----------|
| 87.7%  | AY881632 |
| 89.43% | AY881632 |
| 93.49% | AY881632 |
| 90.24% | AY881632 |
| 87.7%  | AY881632 |
| 88.52% | AY881632 |
| 86.88% | KF878932 |
| 89.34% | KF878932 |
| 86.88% | KF878932 |
| 90.16% | KF878932 |
| 88.52% | KF878932 |
| 89.34% | KF878932 |
| 90.16% | KF878932 |
| 80.48% | KF878931 |
| 88.52% | KF878932 |
| 93.54% | JQ723963 |
| 88.52% | JQ723963 |
| 89.43% | KF878932 |
| 86.06% | FJ876969 |
| 84.42% | FJ876969 |
| 90.16% | GQ292767 |
| 83.73% | EU744176 |
| 86.88% | EU744176 |
| 80.32% | FJ876969 |
| 81.14% | GQ292767 |
| 81.96% | EU744176 |
| 86.44% | U51554   |
| 93.33% | U51554   |
| 88.33% | U51554   |
| 88.23% | U51554   |
| 85.12% | U51554   |
| 85.0%  | U51554   |
| 100.0% | AY103189 |
| 81.03% | JN885085 |
| 96.55% | AY103189 |
| 94.82% | AY103189 |
| 98.24% | HM236336 |
| 93.91% | HM236336 |
| 80.0%  | AY103191 |
| 87.28% | FJ858379 |
| 94.91% | GQ214552 |
| 94.06% | GQ214552 |
| 85.12% | AY212805 |
| 85.0%  | AY212805 |
| 86.77% | AY212805 |
| 87.93% | AY541690 |
| 90.67% | JN885091 |
| 87.28% | HM768743 |

|        |               |
|--------|---------------|
| 98.27% | HM236338      |
| 95.68% | FJ648350      |
| 99.13% | AY835669      |
| 93.85% | FJ899594      |
| 99.05% | AY835669      |
| 93.1%  | AY835669      |
| 100.0% | AY833087      |
| 93.1%  | AY835669      |
| 95.32% | AY835669      |
| 85.59% | EF158848      |
| 80.7%  | JN885083      |
| 100.0% | GQ465466      |
| 98.27% | Z22881        |
| 87.93% | AY103190      |
| 100.0% | AY103190      |
| 87.82% | EF486866      |
| 100.0% | EF486866      |
| 81.35% | JX310012      |
| 90.24% | Z29517 Z29539 |
| 93.38% | AF527756      |
| 83.03% | HQ445964      |
| 97.39% | JN867021      |
| 98.26% | JN867021      |
| 88.98% | FJ998031      |
| 88.88% | FJ998031      |
| 88.03% | FJ998031      |
| 84.61% | FJ998033      |
| 88.03% | FJ998034      |
| 91.45% | FJ998034      |
| 89.74% | FJ998034      |
| 91.37% | FJ998036      |
| 87.17% | FJ870068      |
| 97.41% | DQ057347      |
| 85.47% | FJ868205      |
| 86.95% | AY378112      |
| 86.2%  | JN867020      |
| 87.93% | JN867020      |
| 83.62% | JN867020      |
| 84.48% | JN867020      |
| 82.9%  | JN867020      |
| 86.44% | FJ868204      |
| 85.59% | FJ868204      |
| 84.61% | FJ870071      |
| 88.23% | FJ870070      |
| 88.13% | FJ870070      |
| 89.16% | FJ870070      |
| 92.37% | FJ870070      |
| 93.33% | FJ870070      |

|        |          |
|--------|----------|
| 89.91% | FJ870070 |
| 91.59% | FJ870070 |
| 93.27% | FJ870070 |
| 88.23% | FJ870070 |
| 93.27% | FJ870070 |
| 88.23% | FJ870070 |
| 84.03% | FJ870070 |
| 95.79% | FJ870070 |
| 90.75% | FJ870070 |
| 85.71% | FJ870070 |
| 93.27% | FJ870070 |
| 94.11% | FJ870070 |
| 91.59% | FJ870070 |
| 93.27% | FJ870070 |
| 88.13% | FJ870070 |
| 85.71% | FJ870070 |
| 87.39% | FJ870070 |
| 93.27% | FJ870070 |
| 91.59% | FJ870070 |
| 93.27% | FJ870070 |
| 88.23% | FJ870070 |
| 86.55% | FJ870070 |
| 91.59% | FJ870070 |
| 90.75% | FJ870070 |
| 88.23% | FJ870070 |
| 94.11% | FJ870070 |
| 91.59% | FJ870070 |
| 89.91% | FJ870070 |
| 87.39% | FJ870070 |
| 92.43% | FJ870070 |
| 89.07% | FJ870070 |
| 87.5%  | FJ870070 |
| 91.59% | FJ870070 |
| 90.75% | FJ870070 |
| 89.91% | FJ870070 |
| 93.27% | FJ870070 |
| 94.11% | FJ870070 |
| 85.71% | FJ870070 |
| 90.0%  | FJ870070 |
| 92.43% | FJ870070 |
| 92.43% | FJ870070 |
| 93.91% | FJ870070 |
| 89.83% | FJ870070 |
| 93.27% | FJ870070 |
| 91.66% | FJ870070 |
| 91.59% | FJ870070 |
| 91.59% | FJ870070 |
| 89.07% | FJ870070 |

|        |          |
|--------|----------|
| 91.52% | FJ870070 |
| 92.43% | FJ870070 |
| 89.07% | FJ870070 |
| 92.43% | FJ870070 |
| 100.0% | AF300282 |
| 85.59% | AF300283 |
| 91.3%  | AF300282 |
| 87.39% | FJ998037 |
| 86.55% | FJ998037 |
| 87.28% | FJ865206 |
| 82.14% | FJ865206 |
| 98.14% | FJ865207 |
| 99.07% | FJ865207 |
| 96.29% | FJ865207 |
| 86.84% | AY102174 |
| 94.69% | AY331804 |
| 94.64% | AY331805 |
| 98.23% | EU600180 |
| 97.34% | DQ834370 |
| 98.23% | AY331804 |
| 90.51% | AY331804 |
| 92.92% | DQ834370 |
| 93.8%  | AY331804 |
| 100.0% | AY331805 |
| 94.69% | DQ834370 |
| 85.71% | AY331804 |
| 88.79% | AY331804 |
| 90.43% | AY331804 |
| 89.43% | EF014286 |
| 85.0%  | FJ858213 |
| 84.16% | FJ858213 |
| 87.8%  | AM292313 |
| 83.73% | AM292313 |
| 85.36% | AM292312 |
| 82.92% | DQ487194 |
| 95.04% | FJ858215 |
| 99.16% | FJ858217 |
| 84.42% | FJ858217 |
| 83.33% | FJ858217 |
| 86.77% | FJ858217 |
| 94.11% | FJ858217 |
| 95.83% | FJ858217 |
| 87.6%  | AM412525 |
| 94.21% | AM412525 |
| 98.34% | AM412525 |
| 94.21% | AM412525 |
| 89.43% | HM215513 |
| 91.05% | HM215513 |



|        |          |
|--------|----------|
| 94.26% | AM412525 |
| 94.21% | DQ270014 |
| 83.47% | AM412525 |
| 94.21% | AM412525 |
| 80.16% | AM412525 |
| 86.06% | AB486009 |
| 86.88% | X71140   |
| 88.52% | X71140   |
| 94.3%  | X71140   |
| 100.0% | FJ876965 |
| 96.69% | FJ876965 |
| 95.04% | FJ876965 |
| 98.34% | AY541683 |
| 95.04% | AY541683 |
| 88.61% | FJ876963 |
| 90.08% | JQ781699 |
| 93.49% | FJ876963 |
| 100.0% | JQ781699 |
| 90.98% | JQ781699 |
| 95.86% | JQ781699 |
| 90.9%  | AY541683 |
| 91.73% | JQ781699 |
| 91.05% | FJ876963 |
| 90.9%  | JQ781699 |
| 90.98% | JQ781699 |
| 95.12% | FJ876963 |
| 90.98% | AY541683 |
| 93.38% | JQ781699 |
| 90.24% | JQ781699 |
| 92.68% | FJ876963 |
| 89.43% | FJ876963 |
| 86.99% | FJ876963 |
| 97.52% | AY541683 |
| 89.43% | FJ876963 |
| 97.52% | AY541683 |
| 93.49% | FJ876963 |
| 87.8%  | FJ876963 |
| 92.56% | JQ781699 |
| 92.56% | AY541683 |
| 87.8%  | FJ876963 |
| 92.56% | JQ781699 |
| 89.25% | AY541683 |
| 90.08% | JQ781699 |
| 94.21% | AY541683 |
| 88.42% | AY541683 |
| 95.04% | AY541683 |
| 95.04% | AY541683 |
| 90.08% | AY541683 |

|        |          |
|--------|----------|
| 88.61% | FJ876963 |
| 90.24% | DQ986131 |
| 89.43% | FJ876964 |
| 87.8%  | FJ876964 |
| 95.12% | DQ986131 |
| 82.11% | FJ876964 |
| 87.8%  | FJ876964 |
| 94.3%  | DQ986131 |
| 93.49% | DQ986131 |
| 88.7%  | FJ876964 |
| 94.3%  | DQ986131 |
| 89.43% | FJ876964 |
| 89.43% | FJ876964 |
| 95.93% | FJ876964 |
| 94.3%  | DQ986131 |
| 92.68% | DQ986131 |
| 92.68% | DQ986131 |
| 86.17% | FJ876964 |
| 91.86% | DQ986131 |
| 88.61% | FJ876964 |
| 92.0%  | DQ986131 |
| 92.68% | DQ986131 |
| 91.05% | DQ986131 |
| 95.96% | DQ986131 |
| 88.61% | FJ876964 |
| 90.24% | DQ986131 |
| 89.43% | FJ876964 |
| 94.3%  | DQ986131 |
| 92.68% | FJ876964 |
| 91.93% | DQ986131 |
| 89.43% | FJ876964 |
| 89.51% | DQ986131 |
| 90.16% | AY143573 |
| 89.25% | AY143573 |
| 90.9%  | AY143573 |
| 93.38% | AY143573 |
| 94.26% | AY143573 |
| 90.08% | AY143573 |
| 91.8%  | AY143573 |
| 91.8%  | AY143573 |
| 90.9%  | AY143573 |
| 91.73% | AY143573 |
| 93.38% | AY143573 |
| 90.98% | AY143573 |
| 91.73% | AY143573 |
| 85.83% | AY143573 |
| 92.56% | AY143573 |
| 91.8%  | AY143573 |

|        |          |
|--------|----------|
| 85.83% | AY143573 |
| 85.12% | AY143573 |
| 86.44% | AY143573 |
| 88.42% | AY143573 |
| 84.29% | AY143573 |
| 89.16% | AY143573 |
| 88.42% | AY143573 |
| 84.29% | AY143573 |
| 88.42% | AY143573 |
| 90.08% | AY143573 |
| 86.77% | AY143573 |
| 90.9%  | AY143573 |
| 88.42% | AY143573 |
| 85.83% | AY143573 |
| 88.42% | AY143573 |
| 87.7%  | AY143573 |
| 88.88% | AY143573 |
| 89.25% | AY143573 |
| 88.7%  | DQ393786 |
| 91.86% | DQ393786 |
| 85.36% | DQ393786 |
| 85.36% | DQ393786 |
| 97.56% | AM412524 |
| 97.56% | AM412524 |
| 91.86% | AM412524 |
| 91.86% | AM412524 |
| 92.68% | AM412524 |
| 93.49% | AM412524 |
| 95.93% | AM412524 |
| 99.17% | JQ408172 |
| 100.0% | JQ408166 |
| 98.34% | JQ408166 |
| 99.17% | JQ408166 |
| 99.17% | JQ408166 |
| 97.52% | JQ408166 |
| 98.34% | JQ408166 |
| 96.69% | JQ408166 |
| 98.34% | JQ408166 |
| 98.34% | JQ408166 |
| 99.17% | JQ408166 |
| 82.92% | JX178854 |
| 95.04% | JX178900 |
| 86.17% | JX178900 |
| 98.34% | JQ408162 |
| 100.0% | JX178900 |
| 93.02% | AB640683 |
| 94.21% | EU399542 |
| 85.12% | JX178862 |

|        |          |
|--------|----------|
| 98.36% | JQ924057 |
| 97.52% | JQ924057 |
| 85.12% | JQ924057 |
| 95.86% | JQ924057 |
| 99.18% | JQ924057 |
| 98.34% | JQ924057 |
| 95.04% | JQ924057 |
| 95.53% | JQ924057 |
| 98.34% | JQ924057 |
| 96.69% | JQ924057 |
| 97.52% | JQ924057 |
| 97.52% | JQ924057 |
| 99.17% | EU399538 |
| 100.0% | JQ408169 |
| 98.18% | JX101854 |
| 96.69% | JX000469 |
| 91.93% | JX000467 |
| 89.25% | JX000467 |
| 94.21% | JX000467 |
| 95.86% | AY143568 |
| 95.86% | AY143568 |
| 86.77% | AY143568 |
| 95.04% | AY143568 |
| 95.04% | AY143568 |
| 99.17% | JQ392572 |
| 95.04% | JQ392572 |
| 93.38% | JQ392572 |
| 99.18% | JQ924052 |
| 88.42% | JQ924052 |
| 88.42% | JQ924052 |
| 85.95% | JQ924052 |
| 95.04% | JQ924052 |
| 87.6%  | JQ924052 |
| 95.08% | JQ924052 |
| 88.42% | JQ924052 |
| 88.42% | JQ924052 |
| 93.44% | JQ924052 |
| 90.16% | JQ924052 |
| 97.52% | JQ924052 |
| 91.73% | JQ924052 |
| 88.61% | JQ924052 |
| 96.69% | JQ924052 |
| 96.69% | JQ924052 |
| 100.0% | JQ408175 |
| 97.52% | AY143566 |
| 89.25% | JQ408175 |
| 89.25% | JQ408175 |
| 83.47% | JQ408175 |

|        |          |
|--------|----------|
| 95.08% | JQ408175 |
| 99.17% | AY143566 |
| 99.17% | AY143566 |
| 99.17% | AY143566 |
| 95.53% | AY143566 |
| 93.33% | AY143566 |
| 86.77% | AY143566 |
| 92.68% | JQ837816 |
| 92.68% | JQ837816 |
| 98.37% | JQ924059 |
| 91.05% | JQ924059 |
| 97.52% | EU399530 |
| 88.7%  | JQ924059 |
| 99.18% | JQ924059 |
| 98.37% | JQ924059 |
| 91.4%  | JQ408156 |
| 99.17% | JQ408176 |
| 99.17% | JQ408176 |
| 80.0%  | JQ408156 |
| 96.52% | JQ408176 |
| 98.34% | JQ408176 |
| 100.0% | JQ408176 |
| 99.17% | JQ408176 |
| 96.69% | JQ408176 |
| 99.17% | JQ408176 |
| 99.17% | JQ408176 |
| 98.33% | JQ408156 |
| 93.33% | JQ408156 |
| 96.77% | JQ408159 |
| 96.74% | JQ408159 |
| 98.37% | JN871721 |
| 96.74% | JQ408159 |
| 95.93% | JQ408159 |
| 90.24% | JQ408159 |
| 94.35% | JQ408159 |
| 95.12% | JQ408159 |
| 92.68% | JQ408159 |
| 92.68% | JQ408159 |
| 95.96% | JQ408155 |
| 100.0% | JQ408155 |
| 98.37% | EU399536 |
| 95.12% | JQ408155 |
| 97.56% | JQ408155 |
| 91.93% | EU399536 |
| 94.3%  | EU399536 |
| 98.37% | JQ408155 |
| 98.37% | EU399536 |
| 95.12% | EU399536 |

|        |          |
|--------|----------|
| 91.05% | JQ408155 |
| 94.3%  | JQ408155 |
| 92.68% | JQ408155 |
| 94.3%  | JQ408155 |
| 99.15% | JQ408155 |
| 90.98% | JQ408155 |
| 98.37% | JQ408155 |
| 98.37% | JQ408155 |
| 93.49% | JQ408155 |
| 95.12% | JQ408155 |
| 96.74% | JQ408155 |
| 100.0% | AY143563 |
| 90.32% | AY143563 |
| 94.21% | JQ408171 |
| 90.9%  | JX178773 |
| 87.6%  | JX178773 |
| 88.42% | JX178773 |
| 94.26% | JX178773 |
| 95.08% | JX178773 |
| 82.64% | JX178773 |
| 89.25% | JX178773 |
| 100.0% | EU399535 |
| 88.0%  | EU399535 |
| 80.8%  | JQ837819 |
| 88.88% | EU399535 |
| 95.08% | JQ408160 |
| 100.0% | JQ408160 |
| 95.04% | JQ408160 |
| 86.06% | JQ408160 |
| 95.04% | JQ408160 |
| 81.65% | FJ346568 |
| 100.0% | HM154534 |
| 100.0% | AJ305251 |
| 82.3%  | FR873721 |
| 80.35% | HM140406 |
| 100.0% | EF094972 |
| 85.04% | FJ346568 |
| 97.34% | JF903800 |
| 82.75% | JN172996 |
| 82.75% | JF701983 |
| 84.48% | JF701983 |
| 81.19% | JN172996 |
| 89.34% | AF508778 |
| 89.25% | AF508777 |
| 86.77% | AF508778 |
| 87.6%  | AF508777 |
| 90.9%  | AF508777 |
| 100.0% | KC287214 |

|        |          |
|--------|----------|
| 94.95% | KC287214 |
| 85.48% | JX025560 |
| 84.67% | AY302563 |
| 96.74% | AY302563 |
| 83.73% | AY302563 |
| 83.73% | AY302563 |
| 82.92% | AY302563 |
| 83.06% | AY302563 |
| 82.11% | AY302563 |
| 86.61% | AY302563 |
| 85.36% | AY302563 |
| 83.6%  | AY302563 |
| 85.36% | AY302563 |
| 83.73% | AY302563 |
| 85.36% | AY302563 |
| 82.67% | AY302563 |
| 84.12% | AY302563 |
| 84.55% | AY302563 |
| 83.73% | AY302563 |
| 82.11% | AY302563 |
| 84.55% | AY302563 |
| 82.25% | AY302563 |
| 86.17% | AY302563 |
| 83.73% | AY302563 |
| 86.17% | AY302563 |
| 84.55% | AY302563 |
| 82.92% | AY302563 |
| 84.55% | AY302563 |
| 83.2%  | AY302563 |
| 83.73% | AY302563 |
| 82.25% | AY302563 |
| 83.87% | AY302563 |
| 83.73% | AY302563 |
| 83.06% | AY302563 |
| 86.99% | AY302563 |
| 84.0%  | AY302563 |
| 83.73% | AY302563 |
| 82.11% | AY302563 |
| 83.73% | AY302563 |
| 82.11% | AY302563 |
| 83.87% | AY302563 |
| 81.3%  | AY302563 |
| 85.36% | AY302563 |
| 82.11% | AY302563 |
| 81.74% | AY302563 |
| 82.92% | AY302563 |
| 84.67% | AY302563 |
| 82.92% | AY302563 |

|        |          |
|--------|----------|
| 85.48% | AY302563 |
| 82.11% | AY302563 |
| 83.73% | AY302563 |
| 84.55% | AY302563 |
| 84.92% | AY302563 |
| 84.55% | AY302563 |
| 82.92% | AY302563 |
| 85.36% | AY302563 |
| 83.73% | AY302563 |
| 80.64% | AY302563 |
| 83.87% | AY302563 |
| 81.74% | AY302563 |
| 83.87% | AY302563 |
| 84.55% | AY302563 |
| 83.73% | AY302563 |
| 82.11% | AY302563 |
| 84.25% | AY302563 |
| 83.73% | AY302563 |
| 81.3%  | AY302563 |
| 83.73% | AY302563 |
| 84.8%  | AY302563 |
| 83.73% | AY302563 |
| 83.06% | AY302563 |
| 82.11% | AY302563 |
| 80.48% | AY302563 |
| 86.99% | AY302563 |
| 81.3%  | AY302563 |
| 86.17% | AY302563 |
| 86.17% | AY302563 |
| 93.54% | AY302563 |
| 82.25% | AY302563 |
| 82.92% | AY302563 |
| 82.11% | AY302563 |
| 98.37% | AY302563 |
| 83.73% | AY302563 |
| 83.2%  | AY302563 |
| 81.6%  | AY302563 |
| 82.11% | AY302563 |
| 82.92% | AY302563 |
| 84.55% | AY302563 |
| 84.55% | AY302563 |
| 80.48% | AY302563 |
| 85.36% | AY302563 |
| 83.73% | AY302563 |
| 99.19% | FJ422990 |
| 90.24% | FJ876958 |
| 80.48% | FJ422988 |
| 90.4%  | FJ422988 |



|        |          |
|--------|----------|
| 95.96% | FJ422990 |
| 87.3%  | FJ422988 |
| 86.88% | FJ377547 |
| 98.38% | EF486862 |
| 95.96% | EF486862 |
| 95.96% | EF486862 |
| 95.96% | EF486862 |
| 88.42% | FJ422991 |
| 98.38% | FJ543107 |
| 98.38% | JF791016 |
| 92.74% | FJ543107 |
| 94.35% | JF791016 |
| 93.49% | JX178850 |
| 92.68% | JX178826 |
| 95.96% | JF791016 |
| 96.77% | JF791016 |
| 95.16% | JF791016 |
| 92.74% | JX178826 |
| 95.16% | JF791016 |
| 96.77% | JF791016 |
| 98.37% | JX178850 |
| 98.38% | JF791016 |
| 96.77% | JF791016 |
| 98.37% | JX178850 |
| 96.74% | JX178850 |
| 97.58% | AY541684 |
| 91.93% | JX178850 |
| 97.58% | JF791016 |
| 95.96% | JF791016 |
| 94.35% | FJ543107 |
| 99.19% | JF791016 |
| 95.96% | JF791016 |
| 98.38% | JF791016 |
| 99.19% | JF791016 |
| 86.06% | DQ662848 |
| 91.05% | DQ662848 |
| 96.82% | JF791016 |
| 98.38% | JF791016 |
| 95.96% | JF791016 |
| 98.38% | JF791016 |
| 93.54% | FJ543107 |
| 83.73% | JX178826 |
| 94.35% | JF791016 |
| 93.54% | JX178850 |
| 96.77% | JF791016 |
| 89.51% | AY143564 |
| 99.19% | JF791016 |
| 87.2%  | U97112   |

|        |          |
|--------|----------|
| 84.55% | JX178850 |
| 98.38% | JF791016 |
| 95.96% | JF791016 |
| 88.61% | JX178850 |
| 93.49% | JX178850 |
| 96.77% | JF791016 |
| 91.05% | JF791016 |
| 97.58% | JF791016 |
| 95.16% | FJ543107 |
| 94.35% | FJ543107 |
| 97.58% | JF791016 |
| 97.58% | JF791016 |
| 96.77% | FJ543107 |
| 98.38% | JF791016 |
| 95.12% | JF791016 |
| 97.58% | JF791016 |
| 95.93% | DQ662848 |
| 90.32% | FJ543107 |
| 97.58% | JF791016 |
| 98.38% | JF791016 |
| 94.4%  | JF791016 |
| 91.05% | DQ662848 |
| 91.86% | JX178850 |
| 98.38% | JF791016 |
| 94.3%  | JX178850 |
| 88.7%  | FJ543107 |
| 86.99% | JX178850 |
| 94.3%  | U97112   |
| 87.09% | JF791016 |
| 97.58% | JF791016 |
| 96.77% | JF791016 |
| 98.4%  | JF791016 |
| 97.58% | JF791016 |
| 87.09% | JF791016 |
| 95.16% | JF791016 |
| 91.93% | JF791016 |
| 88.61% | JX178850 |
| 91.12% | FJ543107 |
| 95.96% | FJ543107 |
| 94.35% | FJ543107 |
| 96.77% | JF791016 |
| 97.58% | JF791016 |
| 97.58% | JF791016 |
| 98.36% | JF791016 |
| 96.77% | JF791016 |
| 96.77% | JF791016 |
| 94.3%  | FJ543107 |
| 97.56% | JF791016 |

|        |          |
|--------|----------|
| 86.17% | DQ811090 |
| 94.65% | FJ422993 |
| 96.0%  | JX178820 |
| 91.93% | JX178806 |
| 84.67% | JX178806 |
| 86.4%  | JX178820 |
| 87.4%  | FJ422993 |
| 83.2%  | JX178802 |
| 90.4%  | JX178820 |
| 98.38% | JX178820 |
| 92.74% | FJ422993 |
| 97.58% | FJ422993 |
| 93.54% | JX178820 |
| 95.16% | JX178820 |
| 95.96% | JX178820 |
| 89.51% | JX178788 |
| 99.19% | JX178820 |
| 96.0%  | FJ422993 |
| 96.85% | JX178820 |
| 99.19% | FJ422993 |
| 98.38% | JX178820 |
| 99.19% | JX178820 |
| 98.38% | JX178820 |
| 95.16% | FJ422993 |
| 89.43% | JX178820 |
| 98.38% | FJ422993 |
| 95.96% | JX178820 |
| 99.19% | JX178820 |
| 97.58% | JX178820 |
| 98.38% | FJ422993 |
| 95.16% | JX178820 |
| 86.29% | FJ422993 |
| 95.16% | JX178820 |
| 99.19% | JX178820 |
| 99.19% | JX178820 |
| 91.12% | JX178800 |
| 95.96% | FJ422994 |
| 90.4%  | FJ422994 |
| 94.3%  | FJ422994 |
| 95.12% | FJ422994 |
| 87.2%  | FJ422994 |
| 83.06% | FJ422994 |
| 87.9%  | FJ422994 |
| 89.43% | FJ422994 |
| 87.8%  | FJ422994 |
| 86.99% | FJ715634 |
| 94.3%  | FJ422994 |
| 93.49% | FJ422994 |

|        |               |
|--------|---------------|
| 95.12% | FJ422994      |
| 83.73% | FJ715634      |
| 94.3%  | FJ422994      |
| 86.17% | FJ715634      |
| 88.7%  | FJ422994      |
| 95.12% | FJ422994      |
| 90.32% | FJ422994      |
| 91.05% | FJ422994      |
| 86.99% | FJ422994      |
| 94.3%  | FJ422994      |
| 95.12% | FJ422994      |
| 80.48% | FJ422994      |
| 94.3%  | FJ422994      |
| 94.3%  | FJ422994      |
| 95.79% | FJ422994      |
| 89.51% | FJ422994      |
| 86.99% | FJ715634      |
| 94.91% | AY217727      |
| 98.3%  | X65153        |
| 89.74% | AY217727      |
| 90.08% | AY547545      |
| 83.87% | DQ503583      |
| 87.2%  | DQ503583      |
| 83.06% | DQ503583      |
| 89.6%  | DQ503583      |
| 98.37% | EU399529      |
| 89.43% | JX946277      |
| 91.86% | JX946277      |
| 88.61% | DQ022065      |
| 92.56% | AF164125      |
| 89.43% | AM412772      |
| 86.77% | AF508764      |
| 91.8%  | FN429123      |
| 87.6%  | JX139117      |
| 86.77% | JX139117      |
| 86.99% | FJ870099      |
| 86.99% | EF194083      |
| 86.17% | FJ870099      |
| 86.99% | FJ870099      |
| 86.17% | EF194083      |
| 96.74% | EF194081      |
| 90.9%  | FM209294      |
| 88.42% | AF508768      |
| 90.98% | AF508772      |
| 85.12% | FM209295      |
| 90.9%  | X03947 M14600 |
| 90.08% | JQ723980      |
| 90.24% | GU170843      |

|        |          |
|--------|----------|
| 86.29% | AM412774 |
| 85.03% | X53485   |
| 90.08% | X53485   |
| 89.25% | X53485   |
| 89.25% | X53485   |
| 89.25% | X53485   |
| 91.73% | AJ310485 |
| 88.42% | FJ870089 |
| 91.59% | FJ008721 |
| 82.5%  | KC991098 |
| 90.24% | AB449362 |
| 91.05% | AB449362 |
| 90.24% | AB449362 |
| 90.24% | AB449362 |
| 96.74% | HQ699895 |
| 91.05% | AB449362 |
| 89.43% | AB449362 |
| 92.68% | AB449362 |
| 90.24% | AB449362 |
| 91.93% | AB449362 |
| 90.24% | AB449362 |
| 84.67% | AB449362 |
| 85.95% | AB449365 |
| 88.61% | AB449362 |
| 84.55% | AB449362 |
| 95.12% | HQ699895 |
| 88.61% | AB449362 |
| 88.61% | AB449362 |
| 87.7%  | FJ156105 |
| 96.58% | DQ059583 |
| 96.58% | DQ059583 |
| 96.74% | HM623916 |
| 88.61% | EU220227 |
| 95.93% | EU220227 |
| 100.0% | HM623917 |
| 86.88% | DQ359728 |
| 80.16% | FJ775723 |
| 82.64% | DQ227798 |
| 86.77% | JQ723985 |
| 96.74% | AY294646 |
| 90.9%  | JQ723985 |
| 90.08% | JQ723985 |
| 90.16% | JQ723985 |
| 90.08% | JQ723985 |
| 90.08% | JQ723985 |
| 92.56% | JQ723985 |
| 91.73% | JQ723985 |
| 86.17% | JQ723985 |

|        |          |
|--------|----------|
| 87.9%  | DQ490236 |
| 83.8%  | AM295495 |
| 81.48% | AM295495 |
| 81.65% | DQ168806 |
| 81.81% | DQ168806 |
| 99.13% | EU583992 |
| 96.42% | EU583993 |
| 92.85% | AJ537427 |
| 91.96% | AJ537427 |
| 95.53% | EU583993 |
| 82.3%  | AJ277877 |
| 97.27% | AF527758 |
| 82.52% | U24248   |
| 85.29% | U24248   |
| 82.07% | JX015375 |
| 81.73% | JX015378 |
| 83.65% | JX015378 |
| 82.52% | JQ768407 |
| 82.52% | JQ768407 |
| 81.73% | JX015378 |
| 83.8%  | JX015375 |
| 82.07% | JX015373 |
| 83.01% | JX015375 |
| 82.69% | JX015378 |
| 80.18% | JX015375 |
| 83.8%  | JQ768407 |
| 82.69% | FJ463746 |
